# Supplementary material
Source: publisher site journal article supplement (https://www.dovepress.com/article/supplementary_file/567582/567582%20Revised%20Supplementary%20Tables%201-16.xlsx)
Supplement: Supplementary file 1 [file 567582%20Revised%20Supplementary%20Tables%201-16.xlsx]

## Sheet: Table S1
Table S1. Absolute abundance of microbial species in CRSwNP and control groups (metagenomics)
kingdom	phylum	class	order	family	genus	species	CRSwNP-1	CRSwNP-2	CRSwNP-3	CRSwNP-4	CRSwNP-5	CRSwNP-6	CRSwNP-7	CRSwNP-8	CRSwNP-9	CRSwNP-10	HC-1	HC-2	HC-3	HC-4	HC-5	HC-6	HC-7	HC-8	HC-9	HC-10
Unassigned	Unassigned	Unassigned	Unassigned	Unassigned	Unassigned	Unassigned	9674	11126	8865	1858	9570	3814	7255	5058	7420	5116	32	6357	7832	9049	7470	6457	11583	6892	8138	5245
k__Archaea	p__Candidatus_Altiarchaeota	c__Unclassified	o__Candidatus_Altiarchaeales	f__Unclassified	g__Candidatus_Altiarchaeum	s__Candidatus_Altiarchaeum_sp._CG2_30_32_3053	0	0	0	0	0	0	0	0	4	0	0	0	0	0	0	0	0	0	0	0
k__Archaea	p__Candidatus_Altiarchaeota	c__Unclassified	o__Candidatus_Altiarchaeales	f__Unclassified	g__Unclassified	s__Candidatus_Altiarchaeales_archaeon	5	0	0	0	0	0	0	0	0	3	0	0	0	0	0	0	0	0	0	3
k__Archaea	p__Candidatus_Bathyarchaeota	c__Unclassified	o__Unclassified	f__Unclassified	g__Unclassified	s__Candidatus_Bathyarchaeota_archaeon	0	0	0	5	0	0	0	0	0	0	0	3	0	0	0	0	0	0	0	0
k__Archaea	p__Candidatus_Heimdallarchaeota	c__Unclassified	o__Unclassified	f__Unclassified	g__Unclassified	s__Candidatus_Heimdallarchaeota_archaeon_B3_Heim	0	0	0	0	0	0	0	33	0	0	0	0	0	0	0	0	0	0	0	0
k__Archaea	p__Candidatus_Heimdallarchaeota	c__Unclassified	o__Unclassified	f__Unclassified	g__Unclassified	s__Candidatus_Heimdallarchaeota_archaeon_LC_2	0	0	0	0	0	0	0	0	0	0	0	0	0	0	0	0	0	0	0	0
k__Archaea	p__Candidatus_Lokiarchaeota	c__Unclassified	o__Unclassified	f__Unclassified	g__Unclassified	s__Candidatus_Lokiarchaeota_archaeon_CR_4	0	0	0	16	0	0	0	0	0	0	0	0	0	0	0	0	0	0	0	0
k__Archaea	p__Candidatus_Micrarchaeota	c__Candidatus_Micrarchaeia	o__Candidatus_Micrarchaeales	f__Candidatus_Micrarchaeaceae	g__Candidatus_Micrarchaeum	s__Candidatus_Micrarchaeum_acidiphilum	0	7	0	0	0	0	0	0	0	0	0	0	0	0	0	0	0	0	0	0
k__Archaea	p__Candidatus_Thermoplasmatota	c__Candidatus_Poseidoniia	o__Candidatus_Poseidoniales	f__Unclassified	g__Unclassified	s__Candidatus_Poseidoniales_archaeon	3	3	25	0	0	0	0	0	0	5	0	0	0	0	0	0	3	0	4	0
k__Archaea	p__Candidatus_Thermoplasmatota	c__Thermoplasmata	o__Methanomassiliicoccales	f__Methanomassiliicoccaceae	g__Methanomassiliicoccus	s__Candidatus_Methanomassiliicoccus_intestinalis	0	0	0	63	0	0	0	0	0	0	0	0	0	0	0	0	0	0	0	0
k__Archaea	p__Candidatus_Thermoplasmatota	c__Thermoplasmata	o__Methanomassiliicoccales	f__Methanomassiliicoccaceae	g__Methanomassiliicoccus	s__Methanomassiliicoccus_luminyensis	0	0	0	37	0	0	0	0	0	0	0	0	0	0	0	0	0	0	0	0
k__Archaea	p__Candidatus_Thermoplasmatota	c__Thermoplasmata	o__Thermoplasmatales	f__Ferroplasmaceae	g__Acidiplasma	s__Acidiplasma_cupricumulans	48	15	183	0	184	132	321	189	51	76	0	325	0	78	73	80	208	56	126	66
k__Archaea	p__Candidatus_Thermoplasmatota	c__Thermoplasmata	o__Thermoplasmatales	f__Ferroplasmaceae	g__Ferroplasma	s__Ferroplasma_sp._Type_II	0	5	0	0	0	0	0	0	0	0	0	0	0	0	0	0	0	0	0	0
k__Archaea	p__Candidatus_Thermoplasmatota	c__Thermoplasmata	o__Thermoplasmatales	f__Unclassified	g__Unclassified	s__Thermoplasmatales_archaeon_ex4572_165	0	0	0	0	0	0	5	0	0	0	0	0	0	0	0	0	0	0	0	0
k__Archaea	p__Candidatus_Thermoplasmatota	c__Thermoplasmata	o__Unclassified	f__Unclassified	g__Unclassified	s__Thermoplasmata_archaeon	12	0	0	0	0	0	0	10	3	0	0	0	5	0	0	0	0	0	12	0
k__Archaea	p__Candidatus_Thermoplasmatota	c__Thermoplasmata	o__Unclassified	f__Unclassified	g__Unclassified	s__Thermoplasmata_archaeon_M11B2D	0	0	0	0	0	3	0	0	0	0	0	0	0	0	0	0	0	0	0	0
k__Archaea	p__Candidatus_Thermoplasmatota	c__Unclassified	o__Unclassified	f__Unclassified	g__Aciduliprofundum	s__Aciduliprofundum_sp._MAR08_339	0	0	0	0	0	0	0	0	0	29	0	0	0	0	0	0	0	0	0	0
k__Archaea	p__Candidatus_Thorarchaeota	c__Unclassified	o__Unclassified	f__Unclassified	g__Unclassified	s__Candidatus_Thorarchaeota_archaeon	0	0	0	5	0	0	0	0	0	0	0	0	0	0	0	0	0	0	0	0
k__Archaea	p__Candidatus_Verstraetearchaeota	c__Unclassified	o__Unclassified	f__Unclassified	g__Unclassified	s__Candidatus_Verstraetearchaeota_archaeon	0	0	0	0	0	0	0	0	0	10	0	0	0	0	0	0	0	0	0	0
k__Archaea	p__Candidatus_Woesearchaeota	c__Unclassified	o__Unclassified	f__Unclassified	g__Unclassified	s__Candidatus_Woesearchaeota_archaeon	0	0	0	0	0	0	0	0	0	0	0	0	0	0	0	0	0	22	0	0
k__Archaea	p__Candidatus_Woesearchaeota	c__Unclassified	o__Unclassified	f__Unclassified	g__Unclassified	s__Candidatus_Woesearchaeota_archaeon_CG07_land_8_20_14_0_80_44_23	0	33	0	0	0	0	0	0	0	0	0	0	0	0	0	0	0	0	0	0
k__Archaea	p__Candidatus_Woesearchaeota	c__Unclassified	o__Unclassified	f__Unclassified	g__Unclassified	s__Candidatus_Woesearchaeota_archaeon_CG10_big_fil_rev_8_21_14_0_10_45_16	0	0	0	0	0	0	0	0	0	0	0	0	14	0	0	0	0	0	0	0
k__Archaea	p__Crenarchaeota	c__Thermoprotei	o__Sulfolobales	f__Sulfolobaceae	g__Sulfolobus	s__Sulfolobus_sp._SCGC_AB_777_G05	0	0	0	0	0	0	0	0	0	0	0	0	4	0	0	0	0	0	0	0
k__Archaea	p__Crenarchaeota	c__Thermoprotei	o__Thermoproteales	f__Thermoproteaceae	g__Caldivirga	s__Caldivirga_sp._JCHS_4	0	0	0	0	0	0	0	0	0	30	0	0	0	0	0	0	0	0	0	0
k__Archaea	p__Crenarchaeota	c__Thermoprotei	o__Thermoproteales	f__Thermoproteaceae	g__Thermoproteus	s__Thermoproteus_sp._CP80	0	0	0	3	0	0	0	0	0	0	0	0	0	0	0	0	0	0	0	0
k__Archaea	p__Crenarchaeota	c__Thermoprotei	o__Thermoproteales	f__Thermoproteaceae	g__Thermoproteus	s__Thermoproteus_sp._JCHS_4	0	0	0	0	0	0	0	0	0	3	0	0	0	0	0	0	0	0	0	0
k__Archaea	p__Euryarchaeota	c__Archaeoglobi	o__Archaeoglobales	f__Unclassified	g__Unclassified	s__Archaeoglobales_archaeon	0	0	0	0	0	0	0	0	0	7	0	0	0	0	0	0	0	0	0	0
k__Archaea	p__Euryarchaeota	c__Candidatus_Methanofastidiosa	o__Unclassified	f__Unclassified	g__Candidatus_Methanofastidiosum	s__Candidatus_Methanofastidiosum_methylthiophilus	0	0	0	0	0	0	0	0	0	4	0	0	0	0	0	0	0	0	0	0
k__Archaea	p__Euryarchaeota	c__Halobacteria	o__Halobacteriales	f__Haloarculaceae	g__Natronomonas	s__Natronomonas_sp._CBA1133	0	0	0	0	0	0	0	0	0	0	0	0	0	0	0	0	0	0	0	0
k__Archaea	p__Euryarchaeota	c__Halobacteria	o__Halobacteriales	f__Halococcaceae	g__Halococcus	s__Halococcus_morrhuae	0	4	0	0	0	0	0	0	0	0	0	0	0	0	0	0	0	0	0	0
k__Archaea	p__Euryarchaeota	c__Halobacteria	o__Halobacteriales	f__Halococcaceae	g__Halococcus	s__Halococcus_sediminicola	221	0	0	0	0	0	0	0	0	0	0	0	0	0	0	0	0	0	0	0
k__Archaea	p__Euryarchaeota	c__Halobacteria	o__Halobacteriales	f__Unclassified	g__Unclassified	s__Halobacteriales_archaeon_QH_7_65_31	0	80	0	0	0	0	0	0	0	0	0	0	0	0	0	0	0	0	0	0
k__Archaea	p__Euryarchaeota	c__Methanobacteria	o__Methanobacteriales	f__Methanobacteriaceae	g__Methanobacterium	s__Methanobacterium_sp._Maddingley_MBC34	0	5	0	0	0	0	0	0	0	0	0	0	0	0	0	0	0	0	0	0
k__Archaea	p__Euryarchaeota	c__Methanobacteria	o__Methanobacteriales	f__Methanobacteriaceae	g__Methanobrevibacter	s__Methanobrevibacter_arboriphilus	0	0	0	3	0	0	0	0	0	6	0	0	0	0	0	0	0	0	0	0
k__Archaea	p__Euryarchaeota	c__Methanobacteria	o__Methanobacteriales	f__Methanobacteriaceae	g__Methanobrevibacter	s__Methanobrevibacter_millerae	0	0	0	5	0	0	0	0	0	0	0	0	0	0	0	0	0	0	0	0
k__Archaea	p__Euryarchaeota	c__Methanobacteria	o__Methanobacteriales	f__Methanobacteriaceae	g__Methanobrevibacter	s__Methanobrevibacter_ruminantium	0	17	0	0	0	0	0	0	0	0	0	0	0	0	0	0	0	0	0	0
k__Archaea	p__Euryarchaeota	c__Methanobacteria	o__Methanobacteriales	f__Methanobacteriaceae	g__Methanosphaera	s__Methanosphaera_sp._SHI613	0	7	0	0	0	0	0	0	0	0	0	0	0	0	0	0	0	0	0	0
k__Archaea	p__Euryarchaeota	c__Methanobacteria	o__Methanobacteriales	f__Methanobacteriaceae	g__Methanosphaera	s__Methanosphaera_sp._rholeuAM270	0	38	0	0	0	0	0	0	0	0	0	0	0	0	0	0	0	0	0	0
k__Archaea	p__Euryarchaeota	c__Methanobacteria	o__Methanobacteriales	f__Methanobacteriaceae	g__Methanosphaera	s__Methanosphaera_sp._rholeuAM6	0	0	0	0	0	0	0	0	0	4	0	0	0	0	0	0	0	0	0	0
k__Archaea	p__Euryarchaeota	c__Methanobacteria	o__Methanobacteriales	f__Unclassified	g__Unclassified	s__Methanobacteriales_archaeon_HGW_Methanobacteriales_2	0	7	0	0	0	0	0	0	0	0	0	0	0	0	0	0	0	0	0	0
k__Archaea	p__Euryarchaeota	c__Methanococci	o__Methanococcales	f__Methanocaldococcaceae	g__Methanotorris	s__Methanotorris_formicicus	0	0	0	3	0	0	0	0	0	0	0	0	0	0	0	0	0	0	0	0
k__Archaea	p__Euryarchaeota	c__Methanomicrobia	o__Methanomicrobiales	f__Methanocorpusculaceae	g__Methanocorpusculum	s__Methanocorpusculum_bavaricum	0	0	0	9	0	0	0	0	0	0	0	0	0	0	0	0	0	0	0	0
k__Archaea	p__Euryarchaeota	c__Methanomicrobia	o__Methanomicrobiales	f__Methanomicrobiaceae	g__Methanoculleus	s__Methanoculleus_taiwanensis	0	34	0	0	0	0	0	0	0	0	0	0	0	0	0	0	0	0	0	0
k__Archaea	p__Euryarchaeota	c__Methanomicrobia	o__Methanomicrobiales	f__Methanomicrobiaceae	g__Methanomicrobium	s__Methanomicrobium_mobile	0	23	0	0	0	0	0	0	0	11	0	0	0	0	0	0	0	0	0	0
k__Archaea	p__Euryarchaeota	c__Methanomicrobia	o__Methanomicrobiales	f__Methanomicrobiaceae	g__Methanoplanus	s__Methanoplanus_limicola	0	0	0	0	0	0	0	0	0	0	0	0	0	0	0	0	0	0	0	0
k__Archaea	p__Euryarchaeota	c__Methanomicrobia	o__Methanomicrobiales	f__Methanospirillaceae	g__Methanospirillum	s__Methanospirillum_stamsii	0	0	0	0	0	0	0	0	0	0	0	0	0	0	0	0	0	3	0	0
k__Archaea	p__Euryarchaeota	c__Methanomicrobia	o__Methanomicrobiales	f__Unclassified	g__Unclassified	s__methanogenic_archaeon_mixed_culture_ISO4_G1	0	0	0	0	0	0	0	0	0	0	0	0	0	0	0	0	0	0	0	0
k__Archaea	p__Euryarchaeota	c__Methanomicrobia	o__Methanophagales	f__Unclassified	g__Unclassified	s__Methanophagales_archaeon	0	0	0	0	0	0	0	0	4	0	0	0	0	0	0	0	0	0	0	0
k__Archaea	p__Euryarchaeota	c__Methanomicrobia	o__Methanosarcinales	f__Candidatus_Methanoperedenaceae	g__Candidatus_Methanoperedens	s__Candidatus_Methanoperedens_nitroreducens	0	4	0	0	0	0	0	0	0	0	0	0	0	0	0	0	0	0	0	0
k__Archaea	p__Euryarchaeota	c__Methanomicrobia	o__Methanosarcinales	f__Methanosarcinaceae	g__Methanococcoides	s__Methanococcoides_burtonii	0	0	0	7	0	0	0	0	0	0	0	0	0	0	0	0	0	0	0	0
k__Archaea	p__Euryarchaeota	c__Methanomicrobia	o__Methanosarcinales	f__Methanosarcinaceae	g__Methanococcoides	s__Methanococcoides_methylutens	0	0	0	3	0	0	0	0	0	0	0	0	0	0	0	0	0	0	0	0
k__Archaea	p__Euryarchaeota	c__Methanomicrobia	o__Methanosarcinales	f__Methanosarcinaceae	g__Methanosarcina	s__Methanosarcina_mazei	5	0	0	0	0	0	0	0	0	0	0	0	0	0	0	0	0	0	0	0
k__Archaea	p__Euryarchaeota	c__Methanomicrobia	o__Methanosarcinales	f__Methanosarcinaceae	g__Methanosarcina	s__Methanosarcina_sp._1.H.A.2.2	5	0	0	0	0	0	0	0	0	0	0	0	0	0	0	0	0	0	0	0
k__Archaea	p__Euryarchaeota	c__Methanomicrobia	o__Methanosarcinales	f__Methanosarcinaceae	g__Methanosarcina	s__Methanosarcina_sp._Kolksee	0	0	0	6	0	0	0	0	0	0	0	0	0	0	0	0	0	0	0	0
k__Archaea	p__Euryarchaeota	c__Methanomicrobia	o__Methanosarcinales	f__Methermicoccaceae	g__Methermicoccus	s__Methermicoccus_shengliensis	0	0	0	7	0	0	0	0	0	0	0	0	0	0	0	0	0	0	0	0
k__Archaea	p__Euryarchaeota	c__Methanomicrobia	o__Methanosarcinales	f__Unclassified	g__Unclassified	s__Methanosarcinales_archaeon	3	0	0	17	0	2	0	0	10	18	0	0	0	0	0	8	8	0	10	0
k__Archaea	p__Euryarchaeota	c__Nanohaloarchaea	o__Unclassified	f__Unclassified	g__Unclassified	s__Nanohaloarchaea_archaeon_SW_4_43_9	0	0	0	17	0	0	0	0	0	5	0	0	0	0	0	0	0	0	0	0
k__Archaea	p__Euryarchaeota	c__Thermococci	o__Thermococcales	f__Thermococcaceae	g__Thermococcus	s__Thermococcus_barophilus	0	0	0	11	0	0	0	0	0	0	0	0	0	0	0	0	0	0	0	0
k__Archaea	p__Euryarchaeota	c__Thermococci	o__Thermococcales	f__Thermococcaceae	g__Thermococcus	s__Thermococcus_nautili	0	62	0	0	0	0	0	0	0	0	0	0	0	0	0	0	0	0	0	0
k__Archaea	p__Euryarchaeota	c__Unclassified	o__Unclassified	f__Unclassified	g__Unclassified	s__Euryarchaeota_archaeon	64	0	0	4	0	7	4	0	7	23	0	21	0	2	3	98	0	0	17	4
k__Archaea	p__Euryarchaeota	c__Unclassified	o__Unclassified	f__Unclassified	g__Unclassified	s__Euryarchaeota_archaeon_RBG_13_31_8	0	0	0	0	0	0	0	0	0	4	0	0	0	0	0	0	0	0	0	0
k__Archaea	p__Euryarchaeota	c__Unclassified	o__Unclassified	f__Unclassified	g__Unclassified	s__Euryarchaeota_archaeon_SM23_78	0	0	0	0	0	0	0	0	0	0	0	0	0	0	3	0	0	0	0	0
k__Archaea	p__Euryarchaeota	c__Unclassified	o__Unclassified	f__Unclassified	g__Unclassified	s__Euryarchaeota_archaeon_TMED192	0	9	0	0	0	0	0	0	0	0	0	0	0	0	0	0	0	0	0	0
k__Archaea	p__Euryarchaeota	c__Unclassified	o__Unclassified	f__Unclassified	g__Unclassified	s__Euryarchaeota_archaeon_TMED215	0	0	0	0	0	0	0	0	0	0	0	0	0	0	0	0	0	0	0	0
k__Archaea	p__Euryarchaeota	c__Unclassified	o__Unclassified	f__Unclassified	g__Unclassified	s__uncultured_marine_group_II_III_euryarchaeote_KM3_203_B10	0	0	0	0	0	0	0	0	0	6	0	0	0	0	0	0	0	0	0	0
k__Archaea	p__Euryarchaeota	c__Unclassified	o__Unclassified	f__Unclassified	g__Unclassified	s__uncultured_marine_group_II_III_euryarchaeote_KM3_87_G01	26	0	0	0	0	51	0	130	0	169	0	0	82	0	0	0	0	0	0	0
k__Archaea	p__Thaumarchaeota	c__Unclassified	o__Nitrosopumilales	f__Nitrosopumilaceae	g__Nitrosopumilus	s__Nitrosopumilus_maritimus	0	0	0	0	0	0	0	13	0	0	0	0	0	0	0	0	0	0	5	0
k__Archaea	p__Thaumarchaeota	c__Unclassified	o__Unclassified	f__Unclassified	g__Candidatus_Nitrosotalea	s__Candidatus_Nitrosotalea_bavarica	0	0	0	4	0	0	0	0	0	0	0	0	0	0	0	0	0	0	0	0
k__Archaea	p__Thaumarchaeota	c__Unclassified	o__Unclassified	f__Unclassified	g__Candidatus_Nitrosotalea	s__Candidatus_Nitrosotalea_devanaterra	4	0	0	0	0	0	0	0	0	0	0	0	0	0	0	0	0	0	0	0
k__Archaea	p__Thaumarchaeota	c__Unclassified	o__Unclassified	f__Unclassified	g__Unclassified	s__Thaumarchaeota_archaeon	0	0	0	0	0	0	0	0	0	0	0	0	0	0	5	0	0	0	0	0
k__Archaea	p__Unclassified	c__Unclassified	o__Unclassified	f__Unclassified	g__Unclassified	s__Candidatus_Pacearchaeota_archaeon	0	3	0	4	0	0	0	0	0	18	0	0	0	0	0	0	0	0	0	0
k__Archaea	p__Unclassified	c__Unclassified	o__Unclassified	f__Unclassified	g__Unclassified	s__Unclassified	0	0	0	27	0	0	0	0	0	0	0	0	0	0	0	0	0	0	0	0
k__Archaea	p__Unclassified	c__Unclassified	o__Unclassified	f__Unclassified	g__Unclassified	s__archaeon	26	6	79	32	33	14	21	74	200	55	0	14	9	18	31	15	153	10	65	20
k__Archaea	p__Unclassified	c__Unclassified	o__Unclassified	f__Unclassified	g__Unclassified	s__archaeon_CG10_big_fil_rev_8_21_14_0_10_43_11	0	0	0	8	0	0	0	0	0	0	0	0	0	0	0	0	0	0	0	0
k__Archaea	p__Unclassified	c__Unclassified	o__Unclassified	f__Unclassified	g__Unclassified	s__archaeon_GW2011_AR18	0	0	0	6	0	0	0	0	0	0	0	0	0	0	0	0	0	0	0	0
k__Bacteria	p__Acidobacteria	c__Acidobacteriia	o__Acidobacteriales	f__Acidobacteriaceae	g__Bryocella	s__Bryocella_elongata	0	0	0	13	0	0	0	0	0	0	0	0	0	0	0	0	0	0	0	0
k__Bacteria	p__Acidobacteria	c__Acidobacteriia	o__Acidobacteriales	f__Acidobacteriaceae	g__Candidatus_Koribacter	s__Candidatus_Koribacter_versatilis	0	0	0	0	0	0	0	0	0	0	0	0	0	0	0	0	4	0	0	0
k__Bacteria	p__Acidobacteria	c__Acidobacteriia	o__Acidobacteriales	f__Acidobacteriaceae	g__Candidatus_Sulfotelmatobacter	s__Candidatus_Sulfotelmatobacter_sp._SbA7	0	0	0	0	0	3	0	0	0	0	0	0	0	0	0	0	0	0	0	0
k__Bacteria	p__Acidobacteria	c__Acidobacteriia	o__Acidobacteriales	f__Acidobacteriaceae	g__Edaphobacter	s__Edaphobacter_modestus	0	0	0	4	0	0	0	0	0	0	0	0	0	0	0	0	0	0	0	0
k__Bacteria	p__Acidobacteria	c__Acidobacteriia	o__Acidobacteriales	f__Unclassified	g__Unclassified	s__Acidobacteriales_bacterium_13_1_40CM_3_55_5	0	0	0	0	0	0	0	62	0	0	0	0	0	0	0	0	0	0	0	0
k__Bacteria	p__Acidobacteria	c__Acidobacteriia	o__Bryobacterales	f__Unclassified	g__Unclassified	s__Bryobacterales_bacterium_KBS_96	4	0	0	0	0	0	0	0	0	0	0	0	0	0	0	0	0	0	0	0
k__Bacteria	p__Acidobacteria	c__Acidobacteriia	o__Unclassified	f__Unclassified	g__Unclassified	s__Acidobacteriia_bacterium	0	0	0	0	0	0	0	0	0	4	0	0	0	0	0	0	0	0	4	0
k__Bacteria	p__Acidobacteria	c__Blastocatellia	o__Unclassified	f__Unclassified	g__Chloracidobacterium	s__Chloracidobacterium_sp._CP2_5A	0	0	4	0	0	0	0	0	0	0	0	0	0	0	0	0	0	0	0	0
k__Bacteria	p__Acidobacteria	c__Blastocatellia	o__Unclassified	f__Unclassified	g__Chloracidobacterium	s__Chloracidobacterium_thermophilum	0	0	0	0	0	0	0	0	0	0	0	0	0	0	0	0	14	0	0	0
k__Bacteria	p__Acidobacteria	c__Holophagae	o__Holophagales	f__Holophagaceae	g__Holophaga	s__Holophaga_foetida	0	0	0	0	0	0	0	0	0	0	0	0	0	0	0	0	0	0	0	0
k__Bacteria	p__Acidobacteria	c__Unclassified	o__Unclassified	f__Unclassified	g__Unclassified	s__Acidobacteria_bacterium	51	0	0	59	0	0	52	0	99	14	0	5	8	0	24	9	18	0	8	9
k__Bacteria	p__Acidobacteria	c__Unclassified	o__Unclassified	f__Unclassified	g__Unclassified	s__Acidobacteria_bacterium_37_65_4	0	0	3	0	0	0	0	0	0	0	0	0	0	0	0	0	0	0	0	0
k__Bacteria	p__Acidobacteria	c__Unclassified	o__Unclassified	f__Unclassified	g__Unclassified	s__Acidobacteria_bacterium_RIFCSPLOWO2_02_FULL_64_15	0	3	0	0	0	0	0	0	0	0	0	0	0	0	0	0	6	0	0	0
k__Bacteria	p__Acidobacteria	c__Unclassified	o__Unclassified	f__Unclassified	g__Unclassified	s__Acidobacteria_bacterium_RIFCSPLOWO2_12_FULL_66_21	0	0	0	0	0	0	0	0	0	6	0	0	3	0	0	0	0	0	3	0
k__Bacteria	p__Acidobacteria	c__Unclassified	o__Unclassified	f__Unclassified	g__Unclassified	s__Acidobacteria_bacterium_RIFCSPLOWO2_12_FULL_67_14b	3	0	0	0	0	0	0	0	0	0	0	0	0	0	0	0	0	0	0	0
k__Bacteria	p__Actinobacteria	c__Acidimicrobiia	o__Acidimicrobiales	f__Acidimicrobiaceae	g__Ferrithrix	s__Ferrithrix_thermotolerans	0	0	0	0	0	0	0	0	5	0	0	0	0	0	0	0	0	0	0	0
k__Bacteria	p__Actinobacteria	c__Actinomycetia	o__Actinomycetales	f__Actinomycetaceae	g__Actinobaculum	s__Actinobaculum_massiliense	4	0	0	0	0	0	0	0	0	0	0	0	0	0	0	0	0	0	0	0
k__Bacteria	p__Actinobacteria	c__Actinomycetia	o__Actinomycetales	f__Actinomycetaceae	g__Actinobaculum	s__Actinobaculum_sp._352	0	23	0	15	0	0	0	0	0	0	0	0	0	0	0	0	0	0	0	0
k__Bacteria	p__Actinobacteria	c__Actinomycetia	o__Actinomycetales	f__Actinomycetaceae	g__Actinobaculum	s__Actinobaculum_sp._oral_taxon_183	0	4	0	0	0	0	0	0	0	0	0	0	0	0	0	0	0	0	0	0
k__Bacteria	p__Actinobacteria	c__Actinomycetia	o__Actinomycetales	f__Actinomycetaceae	g__Actinobaculum	s__Actinobaculum_suis	0	27	0	18	0	0	0	0	0	10	0	0	0	0	0	0	0	0	0	0
k__Bacteria	p__Actinobacteria	c__Actinomycetia	o__Actinomycetales	f__Actinomycetaceae	g__Actinomyces	s__Actinomyces_bouchesdurhonensis	285	4062	92	2202	0	7	205	0	6	2027	0	0	0	0	0	0	0	0	0	0
k__Bacteria	p__Actinobacteria	c__Actinomycetia	o__Actinomycetales	f__Actinomycetaceae	g__Actinomyces	s__Actinomyces_bovis	6	0	3	11	0	0	0	0	0	8	0	0	0	0	0	0	0	0	0	0
k__Bacteria	p__Actinobacteria	c__Actinomycetia	o__Actinomycetales	f__Actinomycetaceae	g__Actinomyces	s__Actinomyces_culturomici	0	32	0	3	0	0	0	0	3	30	0	0	0	0	0	0	0	0	0	0
k__Bacteria	p__Actinobacteria	c__Actinomycetia	o__Actinomycetales	f__Actinomycetaceae	g__Actinomyces	s__Actinomyces_dentalis	0	3	0	0	0	0	0	0	0	0	0	0	0	0	0	0	0	0	0	0
k__Bacteria	p__Actinobacteria	c__Actinomycetia	o__Actinomycetales	f__Actinomycetaceae	g__Actinomyces	s__Actinomyces_denticolens	10	0	0	17	0	0	0	0	0	14	0	0	0	0	0	0	0	0	0	0
k__Bacteria	p__Actinobacteria	c__Actinomycetia	o__Actinomycetales	f__Actinomycetaceae	g__Actinomyces	s__Actinomyces_gaoshouyii	0	13	0	0	0	0	0	0	0	0	0	0	0	0	0	0	0	0	0	0
k__Bacteria	p__Actinobacteria	c__Actinomycetia	o__Actinomycetales	f__Actinomycetaceae	g__Actinomyces	s__Actinomyces_gerencseriae	7	91	0	9	0	0	0	0	0	0	0	0	0	0	0	0	0	0	0	0
k__Bacteria	p__Actinobacteria	c__Actinomycetia	o__Actinomycetales	f__Actinomycetaceae	g__Actinomyces	s__Actinomyces_glycerinitolerans	0	0	0	18	0	0	0	0	0	30	0	0	0	0	0	0	0	0	0	0
k__Bacteria	p__Actinobacteria	c__Actinomycetia	o__Actinomycetales	f__Actinomycetaceae	g__Actinomyces	s__Actinomyces_graevenitzii	16653	35572	97	38220	0	14	1878	3	21	16628	0	0	0	0	0	0	0	0	0	0
k__Bacteria	p__Actinobacteria	c__Actinomycetia	o__Actinomycetales	f__Actinomycetaceae	g__Actinomyces	s__Actinomyces_howellii	0	9	0	88	0	0	0	0	0	76	0	0	0	0	0	0	0	0	0	0
k__Bacteria	p__Actinobacteria	c__Actinomycetia	o__Actinomycetales	f__Actinomycetaceae	g__Actinomyces	s__Actinomyces_israelii	0	8	0	7	0	0	0	0	0	0	0	0	0	0	0	0	0	0	0	0
k__Bacteria	p__Actinobacteria	c__Actinomycetia	o__Actinomycetales	f__Actinomycetaceae	g__Actinomyces	s__Actinomyces_johnsonii	0	4	0	55	0	0	0	0	0	23	0	0	0	0	0	0	0	0	0	0
k__Bacteria	p__Actinobacteria	c__Actinomycetia	o__Actinomycetales	f__Actinomycetaceae	g__Actinomyces	s__Actinomyces_lilanjuaniae	0	0	0	33	0	0	0	0	0	24	0	0	0	0	0	0	0	0	0	0
k__Bacteria	p__Actinobacteria	c__Actinomycetia	o__Actinomycetales	f__Actinomycetaceae	g__Actinomyces	s__Actinomyces_marseillensis	0	12	0	0	0	0	0	0	0	0	0	0	0	0	0	0	0	0	0	0
k__Bacteria	p__Actinobacteria	c__Actinomycetia	o__Actinomycetales	f__Actinomycetaceae	g__Actinomyces	s__Actinomyces_massiliensis	0	45	0	0	0	0	0	0	0	0	0	0	0	0	0	0	0	0	0	0
k__Bacteria	p__Actinobacteria	c__Actinomycetia	o__Actinomycetales	f__Actinomycetaceae	g__Actinomyces	s__Actinomyces_mediterranea	6	43	0	21	0	0	0	0	0	10	0	0	0	0	0	0	0	0	0	0
k__Bacteria	p__Actinobacteria	c__Actinomycetia	o__Actinomycetales	f__Actinomycetaceae	g__Actinomyces	s__Actinomyces_minihominis	8	0	0	0	0	0	0	0	0	0	0	0	0	0	0	0	0	0	0	0
k__Bacteria	p__Actinobacteria	c__Actinomycetia	o__Actinomycetales	f__Actinomycetaceae	g__Actinomyces	s__Actinomyces_naeslundii	38	60	0	74	0	0	0	0	0	31	0	0	0	0	0	0	0	0	0	0
k__Bacteria	p__Actinobacteria	c__Actinomycetia	o__Actinomycetales	f__Actinomycetaceae	g__Actinomyces	s__Actinomyces_oricola	16	29	0	16	0	0	0	0	0	10	0	0	0	0	0	0	0	0	0	0
k__Bacteria	p__Actinobacteria	c__Actinomycetia	o__Actinomycetales	f__Actinomycetaceae	g__Actinomyces	s__Actinomyces_oris	16	196	0	13	0	0	0	0	0	9	0	0	0	0	0	0	0	0	0	0
k__Bacteria	p__Actinobacteria	c__Actinomycetia	o__Actinomycetales	f__Actinomycetaceae	g__Actinomyces	s__Actinomyces_pacaensis	98	12	0	0	0	0	0	0	0	6	0	0	0	0	0	0	0	0	0	0
k__Bacteria	p__Actinobacteria	c__Actinomycetia	o__Actinomycetales	f__Actinomycetaceae	g__Actinomyces	s__Actinomyces_polynesiensis	0	8	0	0	0	0	0	0	0	0	0	0	0	0	0	0	0	0	0	0
k__Bacteria	p__Actinobacteria	c__Actinomycetia	o__Actinomycetales	f__Actinomycetaceae	g__Actinomyces	s__Actinomyces_radicidentis	0	0	0	6	0	0	0	0	0	0	0	0	0	0	0	0	0	0	0	0
k__Bacteria	p__Actinobacteria	c__Actinomycetia	o__Actinomycetales	f__Actinomycetaceae	g__Actinomyces	s__Actinomyces_ruminicola	0	5	0	0	0	0	0	0	0	0	0	0	0	0	0	0	0	0	0	0
k__Bacteria	p__Actinobacteria	c__Actinomycetia	o__Actinomycetales	f__Actinomycetaceae	g__Actinomyces	s__Actinomyces_slackii	8	3	0	0	0	0	0	0	0	0	0	0	0	0	0	0	0	0	0	0
k__Bacteria	p__Actinobacteria	c__Actinomycetia	o__Actinomycetales	f__Actinomycetaceae	g__Actinomyces	s__Actinomyces_sp.	47	147	0	146	0	0	2	0	0	108	0	0	0	0	0	0	0	0	0	0
k__Bacteria	p__Actinobacteria	c__Actinomycetia	o__Actinomycetales	f__Actinomycetaceae	g__Actinomyces	s__Actinomyces_sp._Chiba101	0	0	0	19	0	0	0	0	0	0	0	0	0	0	0	0	0	0	0	0
k__Bacteria	p__Actinobacteria	c__Actinomycetia	o__Actinomycetales	f__Actinomycetaceae	g__Actinomyces	s__Actinomyces_sp._CtC_72	0	0	0	0	0	0	0	0	0	6	0	0	0	0	0	0	0	0	0	0
k__Bacteria	p__Actinobacteria	c__Actinomycetia	o__Actinomycetales	f__Actinomycetaceae	g__Actinomyces	s__Actinomyces_sp._HMSC035G02	917	1274	2	650	0	0	7	0	6	1369	0	0	0	0	0	0	0	0	0	0
k__Bacteria	p__Actinobacteria	c__Actinomycetia	o__Actinomycetales	f__Actinomycetaceae	g__Actinomyces	s__Actinomyces_sp._HMSC062G12	6	63	0	47	0	0	0	0	0	26	0	0	0	0	0	0	0	0	0	0
k__Bacteria	p__Actinobacteria	c__Actinomycetia	o__Actinomycetales	f__Actinomycetaceae	g__Actinomyces	s__Actinomyces_sp._HMSC065F11	0	0	0	35	0	0	0	0	0	24	0	0	0	0	0	0	0	0	0	0
k__Bacteria	p__Actinobacteria	c__Actinomycetia	o__Actinomycetales	f__Actinomycetaceae	g__Actinomyces	s__Actinomyces_sp._HMSC065F12	0	33	0	0	0	0	0	0	0	10	0	0	0	0	0	0	0	0	0	0
k__Bacteria	p__Actinobacteria	c__Actinomycetia	o__Actinomycetales	f__Actinomycetaceae	g__Actinomyces	s__Actinomyces_sp._HMSC075B09	0	0	0	0	0	0	0	0	0	5	0	0	0	0	0	0	0	0	0	0
k__Bacteria	p__Actinobacteria	c__Actinomycetia	o__Actinomycetales	f__Actinomycetaceae	g__Actinomyces	s__Actinomyces_sp._HMSC075C01	0	113	0	6	0	0	0	0	0	8	0	0	0	0	0	0	0	0	0	0
k__Bacteria	p__Actinobacteria	c__Actinomycetia	o__Actinomycetales	f__Actinomycetaceae	g__Actinomyces	s__Actinomyces_sp._HMSC08A09	0	3	0	0	0	0	0	0	0	0	0	0	0	0	0	0	0	0	0	0
k__Bacteria	p__Actinobacteria	c__Actinomycetia	o__Actinomycetales	f__Actinomycetaceae	g__Actinomyces	s__Actinomyces_sp._HPA0247	656	2782	16	1182	0	0	114	0	30	1121	0	0	0	0	0	0	0	0	0	0
k__Bacteria	p__Actinobacteria	c__Actinomycetia	o__Actinomycetales	f__Actinomycetaceae	g__Actinomyces	s__Actinomyces_sp._ICM39	4245	8836	98	3852	0	4	250	0	18	5369	0	0	0	0	0	0	0	0	0	0
k__Bacteria	p__Actinobacteria	c__Actinomycetia	o__Actinomycetales	f__Actinomycetaceae	g__Actinomyces	s__Actinomyces_sp._ICM47	1442	97474	351	18885	0	0	506	0	6	6392	0	0	0	0	0	0	0	0	0	0
k__Bacteria	p__Actinobacteria	c__Actinomycetia	o__Actinomycetales	f__Actinomycetaceae	g__Actinomyces	s__Actinomyces_sp._ICM54	1325	1871	15	427	0	0	31	0	12	916	0	0	0	0	0	0	0	0	0	0
k__Bacteria	p__Actinobacteria	c__Actinomycetia	o__Actinomycetales	f__Actinomycetaceae	g__Actinomyces	s__Actinomyces_sp._ICM58	917	19753	125	5503	0	14	672	0	10	3662	0	0	0	0	0	0	0	0	0	0
k__Bacteria	p__Actinobacteria	c__Actinomycetia	o__Actinomycetales	f__Actinomycetaceae	g__Actinomyces	s__Actinomyces_sp._Marseille_P3109	0	4	0	0	0	0	0	0	0	0	0	0	0	0	0	0	0	0	0	0
k__Bacteria	p__Actinobacteria	c__Actinomycetia	o__Actinomycetales	f__Actinomycetaceae	g__Actinomyces	s__Actinomyces_sp._S6_Spd3	1619	9597	0	416	0	4	13	0	3	4319	0	0	0	0	0	0	0	0	0	0
k__Bacteria	p__Actinobacteria	c__Actinomycetia	o__Actinomycetales	f__Actinomycetaceae	g__Actinomyces	s__Actinomyces_sp._oral_taxon_170	0	3	0	4	0	0	0	0	0	0	0	0	0	0	0	0	0	0	0	0
k__Bacteria	p__Actinobacteria	c__Actinomycetia	o__Actinomycetales	f__Actinomycetaceae	g__Actinomyces	s__Actinomyces_sp._oral_taxon_171	6	3	0	0	0	0	0	0	0	0	0	0	0	0	0	0	0	0	0	0
k__Bacteria	p__Actinobacteria	c__Actinomycetia	o__Actinomycetales	f__Actinomycetaceae	g__Actinomyces	s__Actinomyces_sp._oral_taxon_172	411	9912	169	2690	0	5	217	0	2	1623	0	0	0	0	0	0	0	0	0	0
k__Bacteria	p__Actinobacteria	c__Actinomycetia	o__Actinomycetales	f__Actinomycetaceae	g__Actinomyces	s__Actinomyces_sp._oral_taxon_175	0	12	0	0	0	0	0	0	0	0	0	0	0	0	0	0	0	0	0	0
k__Bacteria	p__Actinobacteria	c__Actinomycetia	o__Actinomycetales	f__Actinomycetaceae	g__Actinomyces	s__Actinomyces_sp._oral_taxon_178	40	43	0	11	0	0	0	0	0	7	0	0	0	0	0	0	0	0	0	0
k__Bacteria	p__Actinobacteria	c__Actinomycetia	o__Actinomycetales	f__Actinomycetaceae	g__Actinomyces	s__Actinomyces_sp._oral_taxon_180	95	600	7	241	0	2	33	0	5	313	0	0	0	0	0	0	0	0	0	0
k__Bacteria	p__Actinobacteria	c__Actinomycetia	o__Actinomycetales	f__Actinomycetaceae	g__Actinomyces	s__Actinomyces_sp._oral_taxon_181	403	2934	0	195	0	3	0	0	0	3264	0	0	0	0	0	0	0	0	0	0
k__Bacteria	p__Actinobacteria	c__Actinomycetia	o__Actinomycetales	f__Actinomycetaceae	g__Actinomyces	s__Actinomyces_sp._oral_taxon_414	0	3	0	0	0	0	0	0	0	0	0	0	0	0	0	0	0	0	0	0
k__Bacteria	p__Actinobacteria	c__Actinomycetia	o__Actinomycetales	f__Actinomycetaceae	g__Actinomyces	s__Actinomyces_sp._oral_taxon_448	8	83	0	36	0	0	4	0	0	15	0	0	0	0	0	0	0	0	0	0
k__Bacteria	p__Actinobacteria	c__Actinomycetia	o__Actinomycetales	f__Actinomycetaceae	g__Actinomyces	s__Actinomyces_sp._oral_taxon_848	138	0	0	0	0	0	0	0	0	8	0	0	0	0	0	0	0	0	0	0
k__Bacteria	p__Actinobacteria	c__Actinomycetia	o__Actinomycetales	f__Actinomycetaceae	g__Actinomyces	s__Actinomyces_sp._oral_taxon_849	3	8	0	17	0	0	0	0	0	8	0	0	0	0	0	0	0	0	0	0
k__Bacteria	p__Actinobacteria	c__Actinomycetia	o__Actinomycetales	f__Actinomycetaceae	g__Actinomyces	s__Actinomyces_sp._oral_taxon_877	36	214	4	97	0	0	0	0	0	104	0	0	0	0	0	0	0	0	0	0
k__Bacteria	p__Actinobacteria	c__Actinomycetia	o__Actinomycetales	f__Actinomycetaceae	g__Actinomyces	s__Actinomyces_sp._oral_taxon_897	0	43	0	6	0	0	0	0	0	0	0	0	0	0	0	0	0	0	0	0
k__Bacteria	p__Actinobacteria	c__Actinomycetia	o__Actinomycetales	f__Actinomycetaceae	g__Actinomyces	s__Actinomyces_sp._ph3	65	617	0	69	0	0	0	0	0	608	0	0	0	0	0	0	0	0	0	0
k__Bacteria	p__Actinobacteria	c__Actinomycetia	o__Actinomycetales	f__Actinomycetaceae	g__Actinomyces	s__Actinomyces_succiniciruminis	0	0	0	62	0	0	0	0	0	42	0	0	0	0	0	0	0	0	0	0
k__Bacteria	p__Actinobacteria	c__Actinomycetia	o__Actinomycetales	f__Actinomycetaceae	g__Actinomyces	s__Actinomyces_timonensis	0	46	2	14	0	0	0	0	0	0	0	0	0	0	0	0	0	0	0	0
k__Bacteria	p__Actinobacteria	c__Actinomycetia	o__Actinomycetales	f__Actinomycetaceae	g__Actinomyces	s__Actinomyces_urinae	0	16	0	7	0	0	0	0	0	25	0	0	0	0	0	0	0	0	0	0
k__Bacteria	p__Actinobacteria	c__Actinomycetia	o__Actinomycetales	f__Actinomycetaceae	g__Actinomyces	s__Actinomyces_urogenitalis	8	125	0	104	0	0	0	0	6	9	0	0	0	0	0	0	0	0	0	0
k__Bacteria	p__Actinobacteria	c__Actinomycetia	o__Actinomycetales	f__Actinomycetaceae	g__Actinomyces	s__Actinomyces_viscosus	0	59	0	6	0	0	0	0	0	5	0	0	0	0	0	0	0	0	0	0
k__Bacteria	p__Actinobacteria	c__Actinomycetia	o__Actinomycetales	f__Actinomycetaceae	g__Actinomyces	s__Actinomyces_vulturis	4	38	0	0	0	0	0	0	0	23	0	0	0	0	0	0	0	0	0	0
k__Bacteria	p__Actinobacteria	c__Actinomycetia	o__Actinomycetales	f__Actinomycetaceae	g__Actinomyces	s__Unclassified	2472	13756	135	7469	0	20	373	0	92	7716	0	0	0	0	0	0	0	0	0	0
k__Bacteria	p__Actinobacteria	c__Actinomycetia	o__Actinomycetales	f__Actinomycetaceae	g__Actinotignum	s__Actinotignum_schaalii	0	91	0	14	0	0	0	0	0	0	0	0	0	0	0	0	0	0	0	0
k__Bacteria	p__Actinobacteria	c__Actinomycetia	o__Actinomycetales	f__Actinomycetaceae	g__Ancrocorticia	s__Ancrocorticia_populi	0	0	0	20	0	0	0	0	0	5	0	0	0	0	0	0	0	0	0	0
k__Bacteria	p__Actinobacteria	c__Actinomycetia	o__Actinomycetales	f__Actinomycetaceae	g__Arcanobacterium	s__Arcanobacterium_haemolyticum	0	4	0	16	0	0	0	0	0	0	0	0	0	0	0	0	0	0	0	0
k__Bacteria	p__Actinobacteria	c__Actinomycetia	o__Actinomycetales	f__Actinomycetaceae	g__Arcanobacterium	s__Arcanobacterium_phocae	14	112	0	16	0	0	0	0	0	39	0	0	0	0	0	0	0	0	0	0
k__Bacteria	p__Actinobacteria	c__Actinomycetia	o__Actinomycetales	f__Actinomycetaceae	g__Arcanobacterium	s__Arcanobacterium_sp._S3PF19	0	0	0	0	0	0	7	0	0	0	0	0	0	0	0	0	0	0	0	0
k__Bacteria	p__Actinobacteria	c__Actinomycetia	o__Actinomycetales	f__Actinomycetaceae	g__Arcanobacterium	s__Arcanobacterium_urinimassiliense	0	28	0	14	0	0	0	0	0	3	0	0	0	0	0	0	0	0	0	0
k__Bacteria	p__Actinobacteria	c__Actinomycetia	o__Actinomycetales	f__Actinomycetaceae	g__Boudabousia	s__Boudabousia_liubingyangii	5	0	0	0	0	0	0	0	0	0	0	0	0	0	0	0	0	0	0	0
k__Bacteria	p__Actinobacteria	c__Actinomycetia	o__Actinomycetales	f__Actinomycetaceae	g__Boudabousia	s__Boudabousia_marimammalium	10	138	0	19	0	0	2	0	0	6	0	0	0	0	0	0	0	0	0	0
k__Bacteria	p__Actinobacteria	c__Actinomycetia	o__Actinomycetales	f__Actinomycetaceae	g__Boudabousia	s__Boudabousia_tangfeifanii	0	0	7	0	0	0	0	0	0	0	0	0	0	0	0	0	0	0	0	0
k__Bacteria	p__Actinobacteria	c__Actinomycetia	o__Actinomycetales	f__Actinomycetaceae	g__Buchananella	s__Buchananella_hordeovulneris	0	0	0	9	0	0	6	0	0	0	0	0	0	0	0	0	0	0	0	0
k__Bacteria	p__Actinobacteria	c__Actinomycetia	o__Actinomycetales	f__Actinomycetaceae	g__Fannyhessea	s__Fannyhessea_vaginae	12	8	6	9	0	0	13	0	0	4	0	0	0	8	0	0	0	14	95	0
k__Bacteria	p__Actinobacteria	c__Actinomycetia	o__Actinomycetales	f__Actinomycetaceae	g__Flaviflexus	s__Flaviflexus_ciconiae	0	0	0	0	0	0	0	0	0	14	0	0	0	0	0	0	0	0	0	0
k__Bacteria	p__Actinobacteria	c__Actinomycetia	o__Actinomycetales	f__Actinomycetaceae	g__Gleimia	s__Gleimia_coleocanis	6	0	0	0	0	0	0	0	0	0	0	0	0	0	0	0	0	0	0	0
k__Bacteria	p__Actinobacteria	c__Actinomycetia	o__Actinomycetales	f__Actinomycetaceae	g__Gleimia	s__Gleimia_europaea	0	0	0	26	0	0	0	0	3	18	0	0	0	0	0	0	0	0	0	0
k__Bacteria	p__Actinobacteria	c__Actinomycetia	o__Actinomycetales	f__Actinomycetaceae	g__Gleimia	s__Gleimia_hominis	6	10	0	11	0	0	0	0	0	5	0	0	0	0	0	0	0	0	0	0
k__Bacteria	p__Actinobacteria	c__Actinomycetia	o__Actinomycetales	f__Actinomycetaceae	g__Mobiluncus	s__Mobiluncus_curtisii	0	26	0	7	0	0	0	0	3	0	0	0	0	0	0	0	0	0	0	0
k__Bacteria	p__Actinobacteria	c__Actinomycetia	o__Actinomycetales	f__Actinomycetaceae	g__Mobiluncus	s__Mobiluncus_mulieris	6	16	0	22	0	3	8	0	0	17	0	0	0	0	0	0	0	0	0	0
k__Bacteria	p__Actinobacteria	c__Actinomycetia	o__Actinomycetales	f__Actinomycetaceae	g__Neoactinobaculum	s__Neoactinobaculum_massilliense	0	3	0	0	0	0	9	0	0	11	0	0	0	0	0	0	0	0	0	0
k__Bacteria	p__Actinobacteria	c__Actinomycetia	o__Actinomycetales	f__Actinomycetaceae	g__Schaalia	s__Schaalia_canis	2	11	0	6	0	0	0	0	0	0	0	0	0	0	0	0	0	0	0	0
k__Bacteria	p__Actinobacteria	c__Actinomycetia	o__Actinomycetales	f__Actinomycetaceae	g__Schaalia	s__Schaalia_cardiffensis	0	0	0	40	0	0	0	0	3	23	0	0	0	0	0	0	0	0	0	0
k__Bacteria	p__Actinobacteria	c__Actinomycetia	o__Actinomycetales	f__Actinomycetaceae	g__Schaalia	s__Schaalia_georgiae	4	169	0	161	0	0	3	0	5	127	0	0	0	0	0	0	0	0	0	0
k__Bacteria	p__Actinobacteria	c__Actinomycetia	o__Actinomycetales	f__Actinomycetaceae	g__Schaalia	s__Schaalia_meyeri	37	592	5	138	0	0	0	0	0	65	0	0	0	0	0	0	0	0	0	0
k__Bacteria	p__Actinobacteria	c__Actinomycetia	o__Actinomycetales	f__Actinomycetaceae	g__Schaalia	s__Schaalia_odontolytica	6045	6534	81	3390	0	4	122	0	35	5083	0	0	0	0	0	0	0	0	0	0
k__Bacteria	p__Actinobacteria	c__Actinomycetia	o__Actinomycetales	f__Actinomycetaceae	g__Schaalia	s__Schaalia_radingae	0	0	0	8	0	0	0	0	0	0	0	0	0	0	0	0	0	0	0	0
k__Bacteria	p__Actinobacteria	c__Actinomycetia	o__Actinomycetales	f__Actinomycetaceae	g__Schaalia	s__Schaalia_suimastitidis	0	0	3	7	0	0	0	0	0	9	0	0	0	0	0	0	0	0	0	0
k__Bacteria	p__Actinobacteria	c__Actinomycetia	o__Actinomycetales	f__Actinomycetaceae	g__Schaalia	s__Schaalia_turicensis	0	47	0	40	0	0	1	0	4	126	0	0	0	0	0	0	0	0	0	0
k__Bacteria	p__Actinobacteria	c__Actinomycetia	o__Actinomycetales	f__Actinomycetaceae	g__Schaalia	s__Schaalia_vaccimaxillae	10	0	0	0	0	0	0	0	0	9	0	0	0	0	0	0	0	0	0	0
k__Bacteria	p__Actinobacteria	c__Actinomycetia	o__Actinomycetales	f__Actinomycetaceae	g__Schaalia	s__Unclassified	0	0	149	14	0	0	0	0	0	5	0	0	0	0	0	0	0	0	0	0
k__Bacteria	p__Actinobacteria	c__Actinomycetia	o__Actinomycetales	f__Actinomycetaceae	g__Trueperella	s__Trueperella_bialowiezensis	0	0	0	7	0	0	0	0	0	0	0	0	0	0	0	0	0	0	0	0
k__Bacteria	p__Actinobacteria	c__Actinomycetia	o__Actinomycetales	f__Actinomycetaceae	g__Trueperella	s__Trueperella_pyogenes	11	370	0	58	0	0	14	0	0	223	0	0	0	0	0	0	0	0	0	0
k__Bacteria	p__Actinobacteria	c__Actinomycetia	o__Actinomycetales	f__Actinomycetaceae	g__Unclassified	s__Unclassified	5908	14790	268	6936	0	8	674	0	37	8068	0	0	0	0	0	0	0	0	0	0
k__Bacteria	p__Actinobacteria	c__Actinomycetia	o__Actinomycetales	f__Actinomycetaceae	g__Varibaculum	s__Varibaculum_cambriense	0	61	0	52	0	0	0	0	0	9	0	0	0	0	0	0	0	0	0	0
k__Bacteria	p__Actinobacteria	c__Actinomycetia	o__Actinomycetales	f__Actinomycetaceae	g__Varibaculum	s__Varibaculum_massiliense	0	0	9	20	0	0	0	0	0	5	0	0	0	0	0	0	0	0	0	0
k__Bacteria	p__Actinobacteria	c__Actinomycetia	o__Actinomycetales	f__Actinomycetaceae	g__Varibaculum	s__Varibaculum_timonense	0	60	0	10	0	0	0	0	0	0	0	0	0	0	0	0	0	0	0	0
k__Bacteria	p__Actinobacteria	c__Actinomycetia	o__Actinomycetales	f__Actinomycetaceae	g__Varibaculum	s__Varibaculum_vaginae	0	0	0	4	0	0	0	0	0	0	0	0	0	0	0	0	0	0	0	0
k__Bacteria	p__Actinobacteria	c__Actinomycetia	o__Actinomycetales	f__Unclassified	g__Unclassified	s__Actinomycetales_bacterium_TMED115	0	0	0	0	0	0	3	0	0	0	0	0	0	0	0	0	4	0	0	0
k__Bacteria	p__Actinobacteria	c__Actinomycetia	o__Actinopolysporales	f__Actinopolysporaceae	g__Actinopolyspora	s__Actinopolyspora_halophila	0	0	0	20	0	0	0	0	0	0	0	0	0	0	0	0	0	0	0	0
k__Bacteria	p__Actinobacteria	c__Actinomycetia	o__Bifidobacteriales	f__Bifidobacteriaceae	g__Aeriscardovia	s__Aeriscardovia_aeriphila	0	0	0	3	0	0	0	0	0	0	0	0	0	0	0	0	0	0	0	0
k__Bacteria	p__Actinobacteria	c__Actinomycetia	o__Bifidobacteriales	f__Bifidobacteriaceae	g__Alloscardovia	s__Alloscardovia_criceti	0	104	0	7	0	0	0	0	0	5	0	0	0	0	0	0	0	0	0	0
k__Bacteria	p__Actinobacteria	c__Actinomycetia	o__Bifidobacteriales	f__Bifidobacteriaceae	g__Alloscardovia	s__Alloscardovia_macacae	0	0	0	65	0	0	0	0	0	0	0	0	0	0	0	0	0	0	0	0
k__Bacteria	p__Actinobacteria	c__Actinomycetia	o__Bifidobacteriales	f__Bifidobacteriaceae	g__Alloscardovia	s__Alloscardovia_omnicolens	6	16	0	0	0	0	0	0	0	6	0	0	0	0	0	0	0	0	0	0
k__Bacteria	p__Actinobacteria	c__Actinomycetia	o__Bifidobacteriales	f__Bifidobacteriaceae	g__Alloscardovia	s__Alloscardovia_sp._HMSC034E08	0	0	0	10	0	0	0	0	0	0	0	0	0	0	0	0	0	0	0	0
k__Bacteria	p__Actinobacteria	c__Actinomycetia	o__Bifidobacteriales	f__Bifidobacteriaceae	g__Bifidobacterium	s__Bifidobacterium_adolescentis	0	67	0	0	0	0	0	0	0	0	0	0	0	0	0	0	0	0	0	0
k__Bacteria	p__Actinobacteria	c__Actinomycetia	o__Bifidobacteriales	f__Bifidobacteriaceae	g__Bifidobacterium	s__Bifidobacterium_aemilianum	0	0	0	0	0	0	0	0	0	13	0	0	0	0	0	0	0	0	0	0
k__Bacteria	p__Actinobacteria	c__Actinomycetia	o__Bifidobacteriales	f__Bifidobacteriaceae	g__Bifidobacterium	s__Bifidobacterium_animalis	0	0	0	0	0	0	0	0	0	0	0	0	0	0	0	0	0	0	0	0
k__Bacteria	p__Actinobacteria	c__Actinomycetia	o__Bifidobacteriales	f__Bifidobacteriaceae	g__Bifidobacterium	s__Bifidobacterium_asteroides	0	33	0	0	0	0	0	0	0	0	0	0	0	0	0	0	0	0	0	0
k__Bacteria	p__Actinobacteria	c__Actinomycetia	o__Bifidobacteriales	f__Bifidobacteriaceae	g__Bifidobacterium	s__Bifidobacterium_biavatii	0	0	0	0	0	0	0	0	0	13	0	0	0	0	0	0	0	0	0	0
k__Bacteria	p__Actinobacteria	c__Actinomycetia	o__Bifidobacteriales	f__Bifidobacteriaceae	g__Bifidobacterium	s__Bifidobacterium_bohemicum	0	0	0	0	0	0	0	0	0	23	0	0	0	0	0	0	0	0	0	0
k__Bacteria	p__Actinobacteria	c__Actinomycetia	o__Bifidobacteriales	f__Bifidobacteriaceae	g__Bifidobacterium	s__Bifidobacterium_breve	0	17	0	4	0	0	0	0	8	21	0	0	0	0	0	0	4	0	0	0
k__Bacteria	p__Actinobacteria	c__Actinomycetia	o__Bifidobacteriales	f__Bifidobacteriaceae	g__Bifidobacterium	s__Bifidobacterium_callitrichidarum	0	12	0	0	0	0	0	0	0	0	0	0	0	0	0	0	0	0	0	0
k__Bacteria	p__Actinobacteria	c__Actinomycetia	o__Bifidobacteriales	f__Bifidobacteriaceae	g__Bifidobacterium	s__Bifidobacterium_catenulatum	0	0	0	0	0	0	6	0	0	0	0	0	0	0	0	0	0	0	0	0
k__Bacteria	p__Actinobacteria	c__Actinomycetia	o__Bifidobacteriales	f__Bifidobacteriaceae	g__Bifidobacterium	s__Bifidobacterium_coryneforme	0	0	0	0	0	0	0	0	0	5	0	0	7	0	0	0	0	7	0	0
k__Bacteria	p__Actinobacteria	c__Actinomycetia	o__Bifidobacteriales	f__Bifidobacteriaceae	g__Bifidobacterium	s__Bifidobacterium_dentium	3	4	0	7	0	0	0	0	0	0	0	0	0	0	0	0	0	0	0	0
k__Bacteria	p__Actinobacteria	c__Actinomycetia	o__Bifidobacteriales	f__Bifidobacteriaceae	g__Bifidobacterium	s__Bifidobacterium_gallicum	0	14	0	0	0	0	0	0	0	0	0	0	0	0	0	0	0	0	0	0
k__Bacteria	p__Actinobacteria	c__Actinomycetia	o__Bifidobacteriales	f__Bifidobacteriaceae	g__Bifidobacterium	s__Bifidobacterium_lemurum	13	7	0	0	0	0	0	0	0	8	0	0	0	0	0	0	0	0	0	0
k__Bacteria	p__Actinobacteria	c__Actinomycetia	o__Bifidobacteriales	f__Bifidobacteriaceae	g__Bifidobacterium	s__Bifidobacterium_longum	0	87	0	33	0	4	0	0	0	34	0	0	0	0	0	0	0	0	0	0
k__Bacteria	p__Actinobacteria	c__Actinomycetia	o__Bifidobacteriales	f__Bifidobacteriaceae	g__Bifidobacterium	s__Bifidobacterium_magnum	0	6	0	0	0	0	0	0	0	0	0	0	0	0	0	0	0	0	0	0
k__Bacteria	p__Actinobacteria	c__Actinomycetia	o__Bifidobacteriales	f__Bifidobacteriaceae	g__Bifidobacterium	s__Bifidobacterium_mongoliense	3	0	0	0	0	0	0	0	0	0	0	0	0	0	0	0	0	0	0	0
k__Bacteria	p__Actinobacteria	c__Actinomycetia	o__Bifidobacteriales	f__Bifidobacteriaceae	g__Bifidobacterium	s__Bifidobacterium_moukalabense	0	99	0	83	0	0	0	0	0	0	0	0	0	0	0	0	0	0	0	0
k__Bacteria	p__Actinobacteria	c__Actinomycetia	o__Bifidobacteriales	f__Bifidobacteriaceae	g__Bifidobacterium	s__Bifidobacterium_parmae	0	0	0	0	0	0	3	0	0	0	0	0	0	0	0	0	0	0	0	0
k__Bacteria	p__Actinobacteria	c__Actinomycetia	o__Bifidobacteriales	f__Bifidobacteriaceae	g__Bifidobacterium	s__Bifidobacterium_porcinum	0	0	0	0	0	0	0	0	0	0	0	0	0	0	0	0	0	0	0	0
k__Bacteria	p__Actinobacteria	c__Actinomycetia	o__Bifidobacteriales	f__Bifidobacteriaceae	g__Bifidobacterium	s__Bifidobacterium_pseudocatenulatum	3	76	0	0	0	0	0	0	0	0	0	0	0	0	0	0	0	0	0	0
k__Bacteria	p__Actinobacteria	c__Actinomycetia	o__Bifidobacteriales	f__Bifidobacteriaceae	g__Bifidobacterium	s__Bifidobacterium_pseudolongum	17	5	0	12	0	0	0	0	0	0	0	0	0	0	0	0	0	0	0	0
k__Bacteria	p__Actinobacteria	c__Actinomycetia	o__Bifidobacteriales	f__Bifidobacteriaceae	g__Bifidobacterium	s__Bifidobacterium_pullorum	0	6	0	0	0	0	0	0	0	0	0	0	0	0	0	0	0	0	0	0
k__Bacteria	p__Actinobacteria	c__Actinomycetia	o__Bifidobacteriales	f__Bifidobacteriaceae	g__Bifidobacterium	s__Bifidobacterium_samirii	0	0	0	0	0	4	0	0	0	0	0	0	0	0	0	0	0	0	0	0
k__Bacteria	p__Actinobacteria	c__Actinomycetia	o__Bifidobacteriales	f__Bifidobacteriaceae	g__Bifidobacterium	s__Bifidobacterium_sp._MSTE12	0	0	0	0	0	0	0	0	0	3	0	0	0	0	0	0	0	0	0	0
k__Bacteria	p__Actinobacteria	c__Actinomycetia	o__Bifidobacteriales	f__Bifidobacteriaceae	g__Bifidobacterium	s__Bifidobacterium_stellenboschense	0	0	0	20	0	0	0	0	0	0	0	0	0	0	0	0	0	0	0	0
k__Bacteria	p__Actinobacteria	c__Actinomycetia	o__Bifidobacteriales	f__Bifidobacteriaceae	g__Bifidobacterium	s__Bifidobacterium_thermacidophilum	0	0	0	26	0	0	0	0	0	13	0	0	0	0	0	0	0	0	0	0
k__Bacteria	p__Actinobacteria	c__Actinomycetia	o__Bifidobacteriales	f__Bifidobacteriaceae	g__Bifidobacterium	s__Bifidobacterium_thermophilum	0	0	0	0	0	0	0	0	0	4	0	0	0	0	0	0	0	0	0	0
k__Bacteria	p__Actinobacteria	c__Actinomycetia	o__Bifidobacteriales	f__Bifidobacteriaceae	g__Bifidobacterium	s__Bifidobacterium_vansinderenii	0	0	0	4	0	0	0	0	0	0	0	0	0	0	0	0	0	0	0	0
k__Bacteria	p__Actinobacteria	c__Actinomycetia	o__Bifidobacteriales	f__Bifidobacteriaceae	g__Bifidobacterium	s__Unclassified	9	12	0	21	0	0	11	0	0	11	0	0	0	0	0	0	0	0	0	0
k__Bacteria	p__Actinobacteria	c__Actinomycetia	o__Bifidobacteriales	f__Bifidobacteriaceae	g__Gardnerella	s__Gardnerella_vaginalis	0	46	0	59	0	0	0	0	0	238	0	0	0	0	0	0	0	0	0	0
k__Bacteria	p__Actinobacteria	c__Actinomycetia	o__Bifidobacteriales	f__Bifidobacteriaceae	g__Parascardovia	s__Parascardovia_denticolens	16	46	0	0	0	0	0	0	0	11	0	0	0	0	0	0	0	0	0	0
k__Bacteria	p__Actinobacteria	c__Actinomycetia	o__Bifidobacteriales	f__Bifidobacteriaceae	g__Pseudoscardovia	s__Pseudoscardovia_radai	0	20	0	0	0	0	0	0	0	8	0	0	0	0	0	0	0	0	0	0
k__Bacteria	p__Actinobacteria	c__Actinomycetia	o__Bifidobacteriales	f__Bifidobacteriaceae	g__Pseudoscardovia	s__Pseudoscardovia_suis	0	0	0	0	0	0	0	0	0	3	0	0	0	0	0	0	0	0	0	0
k__Bacteria	p__Actinobacteria	c__Actinomycetia	o__Bifidobacteriales	f__Bifidobacteriaceae	g__Scardovia	s__Scardovia_wiggsiae	0	20	0	0	0	0	0	0	0	0	0	0	0	0	0	0	0	0	0	0
k__Bacteria	p__Actinobacteria	c__Actinomycetia	o__Bifidobacteriales	f__Bifidobacteriaceae	g__Unclassified	s__Bifidobacteriaceae_bacterium_NR047	0	8	0	0	0	0	0	0	0	0	0	0	0	0	0	0	0	0	0	0
k__Bacteria	p__Actinobacteria	c__Actinomycetia	o__Bifidobacteriales	f__Bifidobacteriaceae	g__Unclassified	s__Unclassified	3	8	0	0	0	0	0	0	0	0	0	0	0	0	0	0	0	0	0	0
k__Bacteria	p__Actinobacteria	c__Actinomycetia	o__Corynebacteriales	f__Corynebacteriaceae	g__Corynebacterium	s__Corynebacterium_accolens	17	0	0	0	0	0	11	0	75	0	0	6	0	0	0	0	11	0	404	4
k__Bacteria	p__Actinobacteria	c__Actinomycetia	o__Corynebacteriales	f__Corynebacteriaceae	g__Corynebacterium	s__Corynebacterium_amycolatum	13	0	0	0	0	0	0	0	0	0	0	0	0	0	0	0	0	0	0	0
k__Bacteria	p__Actinobacteria	c__Actinomycetia	o__Corynebacteriales	f__Corynebacteriaceae	g__Corynebacterium	s__Corynebacterium_appendicis	0	0	0	30	0	0	0	0	0	0	0	0	0	0	0	0	0	0	0	0
k__Bacteria	p__Actinobacteria	c__Actinomycetia	o__Corynebacteriales	f__Corynebacteriaceae	g__Corynebacterium	s__Corynebacterium_aquilae	43	0	0	0	0	0	0	0	0	33	0	0	0	0	0	0	0	0	0	0
k__Bacteria	p__Actinobacteria	c__Actinomycetia	o__Corynebacteriales	f__Corynebacteriaceae	g__Corynebacterium	s__Corynebacterium_argentoratense	0	0	0	0	0	30	0	0	0	3262	0	0	0	0	0	0	0	0	0	0
k__Bacteria	p__Actinobacteria	c__Actinomycetia	o__Corynebacteriales	f__Corynebacteriaceae	g__Corynebacterium	s__Corynebacterium_aurimucosum	0	0	0	0	0	0	0	0	0	0	0	36	0	0	0	0	130	0	9	0
k__Bacteria	p__Actinobacteria	c__Actinomycetia	o__Corynebacteriales	f__Corynebacteriaceae	g__Corynebacterium	s__Corynebacterium_bouchesdurhonense	0	0	0	0	0	0	0	0	4	0	0	0	0	0	0	0	0	0	0	0
k__Bacteria	p__Actinobacteria	c__Actinomycetia	o__Corynebacteriales	f__Corynebacteriaceae	g__Corynebacterium	s__Corynebacterium_caspium	0	0	0	56	0	0	0	0	0	0	0	0	0	0	0	0	0	0	0	0
k__Bacteria	p__Actinobacteria	c__Actinomycetia	o__Corynebacteriales	f__Corynebacteriaceae	g__Corynebacterium	s__Corynebacterium_choanae	0	45	0	25	0	0	0	0	0	0	0	0	0	0	0	0	0	0	0	0
k__Bacteria	p__Actinobacteria	c__Actinomycetia	o__Corynebacteriales	f__Corynebacteriaceae	g__Corynebacterium	s__Corynebacterium_ciconiae	0	0	0	7	0	0	0	0	0	0	0	0	0	0	0	0	0	0	0	0
k__Bacteria	p__Actinobacteria	c__Actinomycetia	o__Corynebacteriales	f__Corynebacteriaceae	g__Corynebacterium	s__Corynebacterium_crudilactis	0	4	0	0	0	0	0	0	0	0	0	0	0	0	0	0	0	0	0	0
k__Bacteria	p__Actinobacteria	c__Actinomycetia	o__Corynebacteriales	f__Corynebacteriaceae	g__Corynebacterium	s__Corynebacterium_dentalis	0	17	0	0	0	0	0	0	0	0	0	0	0	0	0	0	0	0	0	0
k__Bacteria	p__Actinobacteria	c__Actinomycetia	o__Corynebacteriales	f__Corynebacteriaceae	g__Corynebacterium	s__Corynebacterium_deserti	0	6	0	0	0	0	0	0	0	0	0	0	0	0	0	0	0	0	0	0
k__Bacteria	p__Actinobacteria	c__Actinomycetia	o__Corynebacteriales	f__Corynebacteriaceae	g__Corynebacterium	s__Corynebacterium_diphtheriae	0	68	64	5	8	0	4	0	14	29	0	3	0	0	0	0	33	0	47	36
k__Bacteria	p__Actinobacteria	c__Actinomycetia	o__Corynebacteriales	f__Corynebacteriaceae	g__Corynebacterium	s__Corynebacterium_durum	0	0	0	0	0	0	0	0	0	0	0	0	0	0	0	0	3	0	0	0
k__Bacteria	p__Actinobacteria	c__Actinomycetia	o__Corynebacteriales	f__Corynebacteriaceae	g__Corynebacterium	s__Corynebacterium_efficiens	0	0	0	0	0	0	0	0	0	0	0	0	0	0	0	0	3	0	0	0
k__Bacteria	p__Actinobacteria	c__Actinomycetia	o__Corynebacteriales	f__Corynebacteriaceae	g__Corynebacterium	s__Corynebacterium_falsenii	9	0	0	0	0	0	0	0	0	0	0	0	0	0	0	0	0	0	0	0
k__Bacteria	p__Actinobacteria	c__Actinomycetia	o__Corynebacteriales	f__Corynebacteriaceae	g__Corynebacterium	s__Corynebacterium_flavescens	0	0	0	0	0	0	0	0	3	0	0	0	0	0	0	0	0	0	0	0
k__Bacteria	p__Actinobacteria	c__Actinomycetia	o__Corynebacteriales	f__Corynebacteriaceae	g__Corynebacterium	s__Corynebacterium_freneyi	3	3	0	0	0	0	0	0	0	0	0	0	0	0	0	0	0	0	0	0
k__Bacteria	p__Actinobacteria	c__Actinomycetia	o__Corynebacteriales	f__Corynebacteriaceae	g__Corynebacterium	s__Corynebacterium_glucuronolyticum	0	0	0	0	0	0	0	0	0	0	0	0	0	0	0	0	3	0	0	0
k__Bacteria	p__Actinobacteria	c__Actinomycetia	o__Corynebacteriales	f__Corynebacteriaceae	g__Corynebacterium	s__Corynebacterium_glutamicum	0	0	0	0	0	0	0	0	0	12	0	0	0	0	0	0	0	0	13	0
k__Bacteria	p__Actinobacteria	c__Actinomycetia	o__Corynebacteriales	f__Corynebacteriaceae	g__Corynebacterium	s__Corynebacterium_gottingense	0	0	0	0	0	0	0	0	0	0	0	0	0	0	0	0	0	0	0	0
k__Bacteria	p__Actinobacteria	c__Actinomycetia	o__Corynebacteriales	f__Corynebacteriaceae	g__Corynebacterium	s__Corynebacterium_halotolerans	0	0	0	0	0	0	0	0	3	0	0	0	0	0	0	0	0	0	0	0
k__Bacteria	p__Actinobacteria	c__Actinomycetia	o__Corynebacteriales	f__Corynebacteriaceae	g__Corynebacterium	s__Corynebacterium_heidelbergense	0	0	0	6	0	0	0	0	0	0	0	0	0	0	0	0	3	0	0	0
k__Bacteria	p__Actinobacteria	c__Actinomycetia	o__Corynebacteriales	f__Corynebacteriaceae	g__Corynebacterium	s__Corynebacterium_jeikeium	275	683	9	146	0	6	17	0	18	146	0	99	0	0	0	0	37	0	0	0
k__Bacteria	p__Actinobacteria	c__Actinomycetia	o__Corynebacteriales	f__Corynebacteriaceae	g__Corynebacterium	s__Corynebacterium_kefirresidentii	0	0	0	0	0	0	0	0	0	0	0	0	0	0	0	0	33	0	8	0
k__Bacteria	p__Actinobacteria	c__Actinomycetia	o__Corynebacteriales	f__Corynebacteriaceae	g__Corynebacterium	s__Corynebacterium_kroppenstedtii	0	0	0	0	0	0	0	0	0	0	0	0	0	0	0	0	0	0	5	0
k__Bacteria	p__Actinobacteria	c__Actinomycetia	o__Corynebacteriales	f__Corynebacteriaceae	g__Corynebacterium	s__Corynebacterium_kutscheri	0	0	0	0	0	0	0	0	0	4	0	0	0	0	0	0	0	0	0	0
k__Bacteria	p__Actinobacteria	c__Actinomycetia	o__Corynebacteriales	f__Corynebacteriaceae	g__Corynebacterium	s__Corynebacterium_lactis	0	0	0	3	0	0	0	0	0	0	0	0	0	0	0	0	0	0	0	0
k__Bacteria	p__Actinobacteria	c__Actinomycetia	o__Corynebacteriales	f__Corynebacteriaceae	g__Corynebacterium	s__Corynebacterium_lipophiloflavum	0	4	0	0	0	0	0	0	0	0	0	0	0	0	0	0	0	0	0	0
k__Bacteria	p__Actinobacteria	c__Actinomycetia	o__Corynebacteriales	f__Corynebacteriaceae	g__Corynebacterium	s__Corynebacterium_lowii	0	0	0	0	0	0	0	0	3	0	0	0	0	0	0	0	0	0	0	0
k__Bacteria	p__Actinobacteria	c__Actinomycetia	o__Corynebacteriales	f__Corynebacteriaceae	g__Corynebacterium	s__Corynebacterium_macginleyi	83	0	0	0	0	0	0	0	6	0	0	0	0	0	0	0	0	0	296	0
k__Bacteria	p__Actinobacteria	c__Actinomycetia	o__Corynebacteriales	f__Corynebacteriaceae	g__Corynebacterium	s__Corynebacterium_mastitidis	61	39	0	0	0	0	0	0	0	0	0	0	0	0	0	0	0	0	0	0
k__Bacteria	p__Actinobacteria	c__Actinomycetia	o__Corynebacteriales	f__Corynebacteriaceae	g__Corynebacterium	s__Corynebacterium_matruchotii	6	0	0	176	0	0	0	0	0	0	0	0	0	0	0	0	0	0	0	0
k__Bacteria	p__Actinobacteria	c__Actinomycetia	o__Corynebacteriales	f__Corynebacteriaceae	g__Corynebacterium	s__Corynebacterium_minutissimum	0	24	0	6	0	0	0	0	0	7	0	3	0	0	0	0	0	0	329	0
k__Bacteria	p__Actinobacteria	c__Actinomycetia	o__Corynebacteriales	f__Corynebacteriaceae	g__Corynebacterium	s__Corynebacterium_mustelae	0	14	0	14	0	0	0	0	0	4	0	0	0	0	0	0	0	0	0	0
k__Bacteria	p__Actinobacteria	c__Actinomycetia	o__Corynebacteriales	f__Corynebacteriaceae	g__Corynebacterium	s__Corynebacterium_otitidis	0	0	0	3	0	0	0	0	0	0	0	0	0	0	0	0	0	0	0	0
k__Bacteria	p__Actinobacteria	c__Actinomycetia	o__Corynebacteriales	f__Corynebacteriaceae	g__Corynebacterium	s__Corynebacterium_pacaense	0	0	0	0	0	0	0	0	14	0	0	0	0	0	0	0	0	0	0	0
k__Bacteria	p__Actinobacteria	c__Actinomycetia	o__Corynebacteriales	f__Corynebacteriaceae	g__Corynebacterium	s__Corynebacterium_pelargi	0	0	0	0	0	0	0	0	0	0	0	0	0	0	0	0	0	0	0	0
k__Bacteria	p__Actinobacteria	c__Actinomycetia	o__Corynebacteriales	f__Corynebacteriaceae	g__Corynebacterium	s__Corynebacterium_phocae	0	0	0	3	0	0	0	0	0	0	0	0	0	0	0	0	0	0	7	0
k__Bacteria	p__Actinobacteria	c__Actinomycetia	o__Corynebacteriales	f__Corynebacteriaceae	g__Corynebacterium	s__Corynebacterium_phoceense	0	0	0	0	0	0	0	0	3	0	0	0	0	0	0	0	0	0	0	0
k__Bacteria	p__Actinobacteria	c__Actinomycetia	o__Corynebacteriales	f__Corynebacteriaceae	g__Corynebacterium	s__Corynebacterium_pollutisoli	0	0	0	0	0	0	0	0	9	0	0	0	0	0	0	0	0	0	0	0
k__Bacteria	p__Actinobacteria	c__Actinomycetia	o__Corynebacteriales	f__Corynebacteriaceae	g__Corynebacterium	s__Corynebacterium_propinquum	0	328	9	23	0	0	47	0	582	24	0	0	0	218	0	0	0	0	2	491
k__Bacteria	p__Actinobacteria	c__Actinomycetia	o__Corynebacteriales	f__Corynebacteriaceae	g__Corynebacterium	s__Corynebacterium_pseudodiphtheriticum	0	0	0	10	0	0	0	0	1782	0	0	0	0	157	0	0	8	0	0	44
k__Bacteria	p__Actinobacteria	c__Actinomycetia	o__Corynebacteriales	f__Corynebacteriaceae	g__Corynebacterium	s__Corynebacterium_pseudogenitalium	0	0	0	0	0	0	0	0	0	0	0	221	0	0	0	0	1010	0	9	0
k__Bacteria	p__Actinobacteria	c__Actinomycetia	o__Corynebacteriales	f__Corynebacteriaceae	g__Corynebacterium	s__Corynebacterium_pseudotuberculosis	0	0	0	0	0	0	0	0	3	0	0	0	0	0	0	0	0	0	0	0
k__Bacteria	p__Actinobacteria	c__Actinomycetia	o__Corynebacteriales	f__Corynebacteriaceae	g__Corynebacterium	s__Corynebacterium_pyruviciproducens	137	411	5	46	0	3	0	0	9	45	0	5	0	0	0	0	0	0	5	0
k__Bacteria	p__Actinobacteria	c__Actinomycetia	o__Corynebacteriales	f__Corynebacteriaceae	g__Corynebacterium	s__Corynebacterium_renale	0	0	0	4	0	0	0	0	0	0	0	0	0	0	0	0	0	0	0	0
k__Bacteria	p__Actinobacteria	c__Actinomycetia	o__Corynebacteriales	f__Corynebacteriaceae	g__Corynebacterium	s__Corynebacterium_resistens	3	24	0	14	0	0	0	0	8	0	0	10	0	0	0	0	17	0	0	0
k__Bacteria	p__Actinobacteria	c__Actinomycetia	o__Corynebacteriales	f__Corynebacteriaceae	g__Corynebacterium	s__Corynebacterium_segmentosum	3	0	0	0	0	0	0	0	0	0	0	0	0	0	0	0	0	0	27	0
k__Bacteria	p__Actinobacteria	c__Actinomycetia	o__Corynebacteriales	f__Corynebacteriaceae	g__Corynebacterium	s__Corynebacterium_senegalense	0	0	0	24	0	0	0	0	0	0	0	0	0	0	0	0	0	0	0	0
k__Bacteria	p__Actinobacteria	c__Actinomycetia	o__Corynebacteriales	f__Corynebacteriaceae	g__Corynebacterium	s__Corynebacterium_simulans	0	0	0	0	0	0	0	0	0	0	0	0	0	0	0	0	0	0	3	0
k__Bacteria	p__Actinobacteria	c__Actinomycetia	o__Corynebacteriales	f__Corynebacteriaceae	g__Corynebacterium	s__Corynebacterium_sp.	0	28	0	3	0	0	0	0	0	0	0	0	0	0	0	0	0	0	0	0
k__Bacteria	p__Actinobacteria	c__Actinomycetia	o__Corynebacteriales	f__Corynebacteriaceae	g__Corynebacterium	s__Corynebacterium_sp._13CS0277	0	0	0	0	0	0	0	0	0	11	0	0	0	0	0	0	0	0	0	0
k__Bacteria	p__Actinobacteria	c__Actinomycetia	o__Corynebacteriales	f__Corynebacteriaceae	g__Corynebacterium	s__Corynebacterium_sp._CMW7794	0	0	0	0	0	0	0	0	0	0	0	7	0	0	0	0	3	0	0	0
k__Bacteria	p__Actinobacteria	c__Actinomycetia	o__Corynebacteriales	f__Corynebacteriaceae	g__Corynebacterium	s__Corynebacterium_sp._EPI_003_04_2554_SCH2473622	0	0	0	0	0	0	0	0	206	0	0	0	0	1	0	0	0	0	0	0
k__Bacteria	p__Actinobacteria	c__Actinomycetia	o__Corynebacteriales	f__Corynebacteriaceae	g__Corynebacterium	s__Corynebacterium_sp._HMSC035E02	0	0	0	0	0	0	0	0	0	0	0	3	0	0	0	0	0	0	0	0
k__Bacteria	p__Actinobacteria	c__Actinomycetia	o__Corynebacteriales	f__Corynebacteriaceae	g__Corynebacterium	s__Corynebacterium_sp._HMSC036D03	0	0	0	0	0	0	0	0	0	0	0	0	0	0	0	0	0	0	0	0
k__Bacteria	p__Actinobacteria	c__Actinomycetia	o__Corynebacteriales	f__Corynebacteriaceae	g__Corynebacterium	s__Corynebacterium_sp._HMSC04H06	0	0	0	0	0	0	0	0	0	0	0	0	0	0	0	0	0	0	0	0
k__Bacteria	p__Actinobacteria	c__Actinomycetia	o__Corynebacteriales	f__Corynebacteriaceae	g__Corynebacterium	s__Corynebacterium_sp._HMSC055A01	0	0	0	0	0	0	0	0	0	0	0	0	0	0	0	0	4	0	0	0
k__Bacteria	p__Actinobacteria	c__Actinomycetia	o__Corynebacteriales	f__Corynebacteriaceae	g__Corynebacterium	s__Corynebacterium_sp._HMSC056F09	0	0	0	0	0	0	0	0	0	0	0	0	0	0	0	0	0	0	0	0
k__Bacteria	p__Actinobacteria	c__Actinomycetia	o__Corynebacteriales	f__Corynebacteriaceae	g__Corynebacterium	s__Corynebacterium_sp._HMSC058E07	0	0	0	0	0	0	0	0	0	0	0	0	0	0	0	0	0	0	36	0
k__Bacteria	p__Actinobacteria	c__Actinomycetia	o__Corynebacteriales	f__Corynebacteriaceae	g__Corynebacterium	s__Corynebacterium_sp._HMSC05H05	0	0	0	0	0	0	0	0	17	0	0	0	0	3	0	0	22	0	0	0
k__Bacteria	p__Actinobacteria	c__Actinomycetia	o__Corynebacteriales	f__Corynebacteriaceae	g__Corynebacterium	s__Corynebacterium_sp._HMSC066C02	0	19	0	0	0	0	0	0	0	0	0	0	0	0	0	0	0	0	0	0
k__Bacteria	p__Actinobacteria	c__Actinomycetia	o__Corynebacteriales	f__Corynebacteriaceae	g__Corynebacterium	s__Corynebacterium_sp._HMSC069E04	0	0	0	0	0	0	0	0	0	0	0	0	0	0	0	0	0	0	0	0
k__Bacteria	p__Actinobacteria	c__Actinomycetia	o__Corynebacteriales	f__Corynebacteriaceae	g__Corynebacterium	s__Corynebacterium_sp._HMSC06D04	0	0	0	0	0	0	0	0	0	0	0	0	0	0	0	0	0	0	0	0
k__Bacteria	p__Actinobacteria	c__Actinomycetia	o__Corynebacteriales	f__Corynebacteriaceae	g__Corynebacterium	s__Corynebacterium_sp._HMSC070H05	0	0	0	0	0	0	0	0	0	0	0	0	0	0	0	0	0	0	4	0
k__Bacteria	p__Actinobacteria	c__Actinomycetia	o__Corynebacteriales	f__Corynebacteriaceae	g__Corynebacterium	s__Corynebacterium_sp._HMSC072A02	0	0	0	0	0	0	0	0	0	0	0	0	0	0	0	0	0	0	3	0
k__Bacteria	p__Actinobacteria	c__Actinomycetia	o__Corynebacteriales	f__Corynebacteriaceae	g__Corynebacterium	s__Corynebacterium_sp._HMSC076C10	0	0	0	0	0	0	0	0	0	0	0	0	0	0	0	0	32	0	0	0
k__Bacteria	p__Actinobacteria	c__Actinomycetia	o__Corynebacteriales	f__Corynebacteriaceae	g__Corynebacterium	s__Corynebacterium_sp._HMSC078A10	0	0	0	0	0	0	0	0	0	0	0	7	0	0	0	0	13	0	0	0
k__Bacteria	p__Actinobacteria	c__Actinomycetia	o__Corynebacteriales	f__Corynebacteriaceae	g__Corynebacterium	s__Corynebacterium_sp._HMSC08C04	0	0	0	0	0	0	0	0	0	4	0	0	0	0	0	0	0	0	21	0
k__Bacteria	p__Actinobacteria	c__Actinomycetia	o__Corynebacteriales	f__Corynebacteriaceae	g__Corynebacterium	s__Corynebacterium_sp._HMSC08D02	0	0	0	0	0	0	0	0	0	8	0	0	0	0	0	0	95	0	6	0
k__Bacteria	p__Actinobacteria	c__Actinomycetia	o__Corynebacteriales	f__Corynebacteriaceae	g__Corynebacterium	s__Corynebacterium_sp._HMSC11D10	0	0	0	0	0	0	0	0	0	0	0	0	0	0	0	0	0	0	43	0
k__Bacteria	p__Actinobacteria	c__Actinomycetia	o__Corynebacteriales	f__Corynebacteriaceae	g__Corynebacterium	s__Corynebacterium_sp._HMSC11E11	0	0	0	5	0	0	0	0	0	0	0	0	0	0	0	0	0	0	0	0
k__Bacteria	p__Actinobacteria	c__Actinomycetia	o__Corynebacteriales	f__Corynebacteriaceae	g__Corynebacterium	s__Corynebacterium_sp._HMSC28B08	0	0	0	5	0	0	0	0	0	0	0	0	0	0	0	0	0	0	0	0
k__Bacteria	p__Actinobacteria	c__Actinomycetia	o__Corynebacteriales	f__Corynebacteriaceae	g__Corynebacterium	s__Corynebacterium_sp._KPL1818	0	0	0	0	0	0	0	0	0	4	0	6	0	0	0	0	3	0	229	0
k__Bacteria	p__Actinobacteria	c__Actinomycetia	o__Corynebacteriales	f__Corynebacteriaceae	g__Corynebacterium	s__Corynebacterium_sp._KPL1824	0	0	0	0	0	0	0	0	0	0	0	0	0	0	0	0	0	0	194	0
k__Bacteria	p__Actinobacteria	c__Actinomycetia	o__Corynebacteriales	f__Corynebacteriaceae	g__Corynebacterium	s__Corynebacterium_sp._KPL1855	8	0	0	0	0	0	0	0	0	0	0	0	0	0	0	0	0	0	89	0
k__Bacteria	p__Actinobacteria	c__Actinomycetia	o__Corynebacteriales	f__Corynebacteriaceae	g__Corynebacterium	s__Corynebacterium_sp._KPL1856	3	0	0	0	0	0	0	0	0	0	0	43	0	0	0	0	31	0	4	0
k__Bacteria	p__Actinobacteria	c__Actinomycetia	o__Corynebacteriales	f__Corynebacteriaceae	g__Corynebacterium	s__Corynebacterium_sp._KPL1860	0	0	0	0	0	0	0	0	0	0	0	8	0	0	0	0	18	0	0	0
k__Bacteria	p__Actinobacteria	c__Actinomycetia	o__Corynebacteriales	f__Corynebacteriaceae	g__Corynebacterium	s__Corynebacterium_sp._KPL1986	0	0	0	0	0	0	0	0	0	0	0	0	0	0	0	0	0	0	3	0
k__Bacteria	p__Actinobacteria	c__Actinomycetia	o__Corynebacteriales	f__Corynebacteriaceae	g__Corynebacterium	s__Corynebacterium_sp._KPL1989	0	0	0	0	0	0	0	0	11	0	0	0	0	0	0	0	0	0	0	0
k__Bacteria	p__Actinobacteria	c__Actinomycetia	o__Corynebacteriales	f__Corynebacteriaceae	g__Corynebacterium	s__Corynebacterium_sp._KPL1995	0	0	0	0	0	0	0	0	261	0	0	0	0	6	0	0	0	0	0	74
k__Bacteria	p__Actinobacteria	c__Actinomycetia	o__Corynebacteriales	f__Corynebacteriaceae	g__Corynebacterium	s__Corynebacterium_sp._KPL1996	0	0	0	0	0	0	0	0	0	0	0	0	0	0	0	0	0	0	25	0
k__Bacteria	p__Actinobacteria	c__Actinomycetia	o__Corynebacteriales	f__Corynebacteriaceae	g__Corynebacterium	s__Corynebacterium_sp._L2_79_05	88	253	0	35	0	0	5	0	0	50	0	0	0	0	0	0	3	0	0	3
k__Bacteria	p__Actinobacteria	c__Actinomycetia	o__Corynebacteriales	f__Corynebacteriaceae	g__Corynebacterium	s__Corynebacterium_sp._MC3	0	0	0	0	0	0	0	0	0	0	0	0	0	0	0	0	4	0	0	0
k__Bacteria	p__Actinobacteria	c__Actinomycetia	o__Corynebacteriales	f__Corynebacteriaceae	g__Corynebacterium	s__Corynebacterium_sp._NML130628	0	0	0	0	0	0	0	0	0	0	0	0	0	0	0	0	4	0	0	0
k__Bacteria	p__Actinobacteria	c__Actinomycetia	o__Corynebacteriales	f__Corynebacteriaceae	g__Corynebacterium	s__Corynebacterium_sp._YIM_101343	0	0	0	0	0	0	8	0	0	0	0	0	0	0	0	0	0	0	0	0
k__Bacteria	p__Actinobacteria	c__Actinomycetia	o__Corynebacteriales	f__Corynebacteriaceae	g__Corynebacterium	s__Corynebacterium_sphenisci	0	0	0	0	0	0	0	0	0	0	0	0	0	0	0	0	3	0	0	0
k__Bacteria	p__Actinobacteria	c__Actinomycetia	o__Corynebacteriales	f__Corynebacteriaceae	g__Corynebacterium	s__Corynebacterium_striatum	62	881	0	0	0	15	4	0	42	3	0	29	0	0	0	0	69	0	98	0
k__Bacteria	p__Actinobacteria	c__Actinomycetia	o__Corynebacteriales	f__Corynebacteriaceae	g__Corynebacterium	s__Corynebacterium_testudinoris	0	5	0	0	0	0	0	0	0	0	0	0	0	0	0	0	0	0	0	0
k__Bacteria	p__Actinobacteria	c__Actinomycetia	o__Corynebacteriales	f__Corynebacteriaceae	g__Corynebacterium	s__Corynebacterium_timonense	7	0	0	0	0	0	0	0	0	0	0	0	0	0	0	0	0	0	0	0
k__Bacteria	p__Actinobacteria	c__Actinomycetia	o__Corynebacteriales	f__Corynebacteriaceae	g__Corynebacterium	s__Corynebacterium_tuberculostearicum	0	30	0	0	0	0	0	0	0	0	0	41	0	0	0	0	222	0	0	0
k__Bacteria	p__Actinobacteria	c__Actinomycetia	o__Corynebacteriales	f__Corynebacteriaceae	g__Corynebacterium	s__Corynebacterium_tuscaniense	5	25	0	2	0	0	0	0	0	0	0	0	0	0	0	0	0	0	0	0
k__Bacteria	p__Actinobacteria	c__Actinomycetia	o__Corynebacteriales	f__Corynebacteriaceae	g__Corynebacterium	s__Corynebacterium_ulcerans	0	0	0	0	0	0	0	0	0	5	0	0	0	0	0	0	0	0	0	0
k__Bacteria	p__Actinobacteria	c__Actinomycetia	o__Corynebacteriales	f__Corynebacteriaceae	g__Corynebacterium	s__Corynebacterium_urealyticum	0	0	0	8	0	0	0	0	0	0	0	4	0	3	0	0	8	0	8	0
k__Bacteria	p__Actinobacteria	c__Actinomycetia	o__Corynebacteriales	f__Corynebacteriaceae	g__Corynebacterium	s__Corynebacterium_urinipleomorphum	0	0	0	0	0	0	0	0	4	0	0	0	0	0	0	0	0	0	0	0
k__Bacteria	p__Actinobacteria	c__Actinomycetia	o__Corynebacteriales	f__Corynebacteriaceae	g__Corynebacterium	s__Corynebacterium_variabile	0	0	0	0	0	0	0	0	3	0	0	0	0	0	0	0	0	0	0	0
k__Bacteria	p__Actinobacteria	c__Actinomycetia	o__Corynebacteriales	f__Corynebacteriaceae	g__Corynebacterium	s__Corynebacterium_vitaeruminis	0	0	0	8	0	0	0	0	0	23	0	0	0	0	0	0	0	0	0	0
k__Bacteria	p__Actinobacteria	c__Actinomycetia	o__Corynebacteriales	f__Corynebacteriaceae	g__Corynebacterium	s__Corynebacterium_xerosis	0	0	0	0	0	0	0	0	5	0	0	0	0	0	0	0	0	0	0	0
k__Bacteria	p__Actinobacteria	c__Actinomycetia	o__Corynebacteriales	f__Corynebacteriaceae	g__Corynebacterium	s__Unclassified	98	61	0	124	0	13	54	0	502	36	0	341	0	21	0	0	453	0	543	194
k__Bacteria	p__Actinobacteria	c__Actinomycetia	o__Corynebacteriales	f__Dietziaceae	g__Dietzia	s__Dietzia_cinnamea	0	0	0	0	0	0	0	0	0	5	0	0	0	0	0	0	0	0	0	0
k__Bacteria	p__Actinobacteria	c__Actinomycetia	o__Corynebacteriales	f__Dietziaceae	g__Dietzia	s__Dietzia_kunjamensis	0	0	0	5	0	0	0	0	0	0	0	0	0	0	0	0	0	0	0	0
k__Bacteria	p__Actinobacteria	c__Actinomycetia	o__Corynebacteriales	f__Dietziaceae	g__Dietzia	s__Dietzia_maris	0	9	0	0	0	0	0	0	0	0	0	0	0	0	0	0	0	0	0	0
k__Bacteria	p__Actinobacteria	c__Actinomycetia	o__Corynebacteriales	f__Dietziaceae	g__Dietzia	s__Dietzia_sp._UCD_THP	0	15	0	0	0	0	0	0	0	0	0	0	0	0	0	0	0	0	0	0
k__Bacteria	p__Actinobacteria	c__Actinomycetia	o__Corynebacteriales	f__Gordoniaceae	g__Gordonia	s__Gordonia_aichiensis	0	0	0	43	0	0	0	0	0	0	0	0	0	0	0	0	0	0	0	0
k__Bacteria	p__Actinobacteria	c__Actinomycetia	o__Corynebacteriales	f__Gordoniaceae	g__Gordonia	s__Gordonia_araii	0	0	0	4	0	0	0	0	0	0	0	0	0	0	0	0	0	0	0	0
k__Bacteria	p__Actinobacteria	c__Actinomycetia	o__Corynebacteriales	f__Gordoniaceae	g__Gordonia	s__Gordonia_sedimidis	0	0	0	0	0	0	0	54	10	0	0	0	0	0	20	0	10	6	0	5
k__Bacteria	p__Actinobacteria	c__Actinomycetia	o__Corynebacteriales	f__Gordoniaceae	g__Gordonia	s__Gordonia_sp.	0	3	0	13	0	0	0	0	0	0	0	0	0	0	0	0	0	0	0	0
k__Bacteria	p__Actinobacteria	c__Actinomycetia	o__Corynebacteriales	f__Gordoniaceae	g__Gordonia	s__Gordonia_sp._KTR9	0	36	0	0	0	0	0	0	0	0	0	0	0	0	0	0	0	0	0	0
k__Bacteria	p__Actinobacteria	c__Actinomycetia	o__Corynebacteriales	f__Gordoniaceae	g__Millisia	s__Millisia_brevis	0	5	0	4	0	0	0	0	0	0	0	0	0	0	0	0	0	0	0	0
k__Bacteria	p__Actinobacteria	c__Actinomycetia	o__Corynebacteriales	f__Lawsonellaceae	g__Lawsonella	s__Lawsonella_clevelandensis	0	0	0	9934	0	0	0	0	0	0	0	0	0	0	0	0	0	0	0	0
k__Bacteria	p__Actinobacteria	c__Actinomycetia	o__Corynebacteriales	f__Mycobacteriaceae	g__Mycobacterium	s__Mycobacterium_asiaticum	0	9	0	0	0	0	0	0	0	0	0	0	0	0	0	0	0	0	0	0
k__Bacteria	p__Actinobacteria	c__Actinomycetia	o__Corynebacteriales	f__Mycobacteriaceae	g__Mycobacterium	s__Mycobacterium_colombiense	0	0	0	0	0	0	0	0	0	0	0	0	0	0	0	0	0	0	7	0
k__Bacteria	p__Actinobacteria	c__Actinomycetia	o__Corynebacteriales	f__Mycobacteriaceae	g__Mycobacterium	s__Mycobacterium_sp._1554424.7	0	0	5	7	0	0	0	0	0	17	0	0	0	0	0	0	0	0	0	0
k__Bacteria	p__Actinobacteria	c__Actinomycetia	o__Corynebacteriales	f__Mycobacteriaceae	g__Mycobacterium	s__Mycobacterium_sp._852013_50091_SCH5140682	0	0	0	0	0	0	0	0	0	75	0	0	0	0	0	0	0	0	0	0
k__Bacteria	p__Actinobacteria	c__Actinomycetia	o__Corynebacteriales	f__Mycobacteriaceae	g__Mycobacterium	s__Mycobacterium_sp._AT1	0	0	0	0	0	0	0	0	0	0	0	0	0	0	0	0	0	0	0	0
k__Bacteria	p__Actinobacteria	c__Actinomycetia	o__Corynebacteriales	f__Mycobacteriaceae	g__Mycobacterium	s__Mycobacterium_sp._MFM001	0	13	0	0	0	0	0	0	0	0	0	0	0	0	0	0	0	0	0	0
k__Bacteria	p__Actinobacteria	c__Actinomycetia	o__Corynebacteriales	f__Mycobacteriaceae	g__Mycobacterium	s__Mycobacterium_sp._UM_Kg1	0	0	0	6	0	0	0	0	0	0	0	0	0	0	0	0	0	0	0	0
k__Bacteria	p__Actinobacteria	c__Actinomycetia	o__Corynebacteriales	f__Mycobacteriaceae	g__Mycobacterium	s__Mycobacterium_sp._shizuoka_1	0	0	0	3	0	0	0	0	0	0	0	0	0	0	0	0	0	0	0	0
k__Bacteria	p__Actinobacteria	c__Actinomycetia	o__Corynebacteriales	f__Mycobacteriaceae	g__Mycobacterium	s__Mycobacterium_tuberculosis	12757	13154	7019	6549	6395	10927	6561	10190	12903	8459	1038	4682	5022	7205	15886	6645	16254	6206	10230	6067
k__Bacteria	p__Actinobacteria	c__Actinomycetia	o__Corynebacteriales	f__Mycobacteriaceae	g__Mycobacteroides	s__Mycobacteroides_abscessus	1374	2295	15	739	0	21	335	3	1359	1306	119	0	7008	0	0	0	232	0	0	644
k__Bacteria	p__Actinobacteria	c__Actinomycetia	o__Corynebacteriales	f__Mycobacteriaceae	g__Mycobacteroides	s__Mycobacteroides_chelonae	0	0	0	0	0	0	0	0	0	48	0	0	5	15	0	0	0	0	0	0
k__Bacteria	p__Actinobacteria	c__Actinomycetia	o__Corynebacteriales	f__Mycobacteriaceae	g__Mycobacteroides	s__Mycobacteroides_immunogenum	0	0	0	0	0	0	0	0	0	4	0	0	0	0	0	0	0	0	0	0
k__Bacteria	p__Actinobacteria	c__Actinomycetia	o__Corynebacteriales	f__Mycobacteriaceae	g__Mycobacteroides	s__Unclassified	0	4	0	0	0	0	0	0	0	0	0	0	0	0	0	0	0	0	0	0
k__Bacteria	p__Actinobacteria	c__Actinomycetia	o__Corynebacteriales	f__Mycobacteriaceae	g__Mycolicibacterium	s__Mycolicibacterium_acapulense	0	0	0	5	0	0	0	0	0	0	0	0	0	0	0	0	0	0	0	0
k__Bacteria	p__Actinobacteria	c__Actinomycetia	o__Corynebacteriales	f__Mycobacteriaceae	g__Mycolicibacterium	s__Mycolicibacterium_agri	0	10	0	0	0	0	0	0	0	0	0	0	0	0	0	0	0	0	0	0
k__Bacteria	p__Actinobacteria	c__Actinomycetia	o__Corynebacteriales	f__Mycobacteriaceae	g__Mycolicibacterium	s__Mycolicibacterium_aromaticivorans	0	0	0	3	0	0	0	0	0	5	0	0	0	0	0	0	0	0	0	0
k__Bacteria	p__Actinobacteria	c__Actinomycetia	o__Corynebacteriales	f__Mycobacteriaceae	g__Mycolicibacterium	s__Mycolicibacterium_conceptionense	4	0	0	0	0	0	0	0	0	0	0	0	0	0	0	0	0	0	0	0
k__Bacteria	p__Actinobacteria	c__Actinomycetia	o__Corynebacteriales	f__Mycobacteriaceae	g__Mycolicibacterium	s__Mycolicibacterium_elephantis	0	0	0	0	0	0	0	0	0	3	0	0	0	0	0	0	0	0	0	0
k__Bacteria	p__Actinobacteria	c__Actinomycetia	o__Corynebacteriales	f__Mycobacteriaceae	g__Mycolicibacterium	s__Mycolicibacterium_moriokaense	0	0	10	0	0	0	0	0	0	0	0	0	6	0	0	0	11	0	0	0
k__Bacteria	p__Actinobacteria	c__Actinomycetia	o__Corynebacteriales	f__Mycobacteriaceae	g__Mycolicibacterium	s__Mycolicibacterium_mucogenicum	43	0	0	0	0	0	0	0	0	0	0	0	0	0	0	0	0	0	0	0
k__Bacteria	p__Actinobacteria	c__Actinomycetia	o__Corynebacteriales	f__Mycobacteriaceae	g__Mycolicibacterium	s__Mycolicibacterium_rhodesiae	0	0	0	0	0	0	0	0	0	38	0	0	0	0	0	0	0	0	0	0
k__Bacteria	p__Actinobacteria	c__Actinomycetia	o__Corynebacteriales	f__Mycobacteriaceae	g__Mycolicibacterium	s__Mycolicibacterium_smegmatis	0	0	0	0	0	0	0	0	0	3	0	0	0	0	0	0	0	0	0	0
k__Bacteria	p__Actinobacteria	c__Actinomycetia	o__Corynebacteriales	f__Mycobacteriaceae	g__Mycolicibacterium	s__Mycolicibacterium_sphagni	0	0	0	14	0	0	0	0	0	0	0	0	0	0	0	0	0	0	0	0
k__Bacteria	p__Actinobacteria	c__Actinomycetia	o__Corynebacteriales	f__Mycobacteriaceae	g__Unclassified	s__Unclassified	0	0	0	6	0	11916	0	0	0	0	0	0	0	0	0	0	0	0	0	0
k__Bacteria	p__Actinobacteria	c__Actinomycetia	o__Corynebacteriales	f__Nocardiaceae	g__Nocardia	s__Nocardia_araoensis	0	0	0	3	0	0	0	0	0	0	0	0	0	0	0	0	0	0	0	0
k__Bacteria	p__Actinobacteria	c__Actinomycetia	o__Corynebacteriales	f__Nocardiaceae	g__Nocardia	s__Nocardia_concava	0	5	0	0	0	0	0	0	0	0	0	0	0	0	0	0	0	0	0	0
k__Bacteria	p__Actinobacteria	c__Actinomycetia	o__Corynebacteriales	f__Nocardiaceae	g__Nocardia	s__Nocardia_harenae	0	5	0	0	0	0	0	0	0	0	0	0	0	0	0	0	0	0	0	0
k__Bacteria	p__Actinobacteria	c__Actinomycetia	o__Corynebacteriales	f__Nocardiaceae	g__Nocardia	s__Nocardia_niwae	5	0	0	0	0	0	0	0	0	12	0	0	0	0	0	0	0	0	0	0
k__Bacteria	p__Actinobacteria	c__Actinomycetia	o__Corynebacteriales	f__Nocardiaceae	g__Nocardia	s__Nocardia_thailandica	0	0	0	0	0	0	0	0	15	0	0	0	0	0	0	0	0	0	0	0
k__Bacteria	p__Actinobacteria	c__Actinomycetia	o__Corynebacteriales	f__Nocardiaceae	g__Nocardia	s__Nocardia_uniformis	0	0	0	10	0	0	0	0	0	0	0	0	0	0	0	0	0	0	0	0
k__Bacteria	p__Actinobacteria	c__Actinomycetia	o__Corynebacteriales	f__Nocardiaceae	g__Nocardia	s__Nocardia_vulneris	0	0	0	0	0	0	0	0	0	9	0	0	0	0	0	0	0	0	0	0
k__Bacteria	p__Actinobacteria	c__Actinomycetia	o__Corynebacteriales	f__Nocardiaceae	g__Rhodococcus	s__Rhodococcus_fascians	0	0	0	7	0	0	0	0	0	0	0	0	0	0	0	0	0	0	0	0
k__Bacteria	p__Actinobacteria	c__Actinomycetia	o__Corynebacteriales	f__Nocardiaceae	g__Rhodococcus	s__Rhodococcus_rhodochrous	0	0	0	0	0	0	0	0	0	16	0	0	0	0	0	0	0	0	0	0
k__Bacteria	p__Actinobacteria	c__Actinomycetia	o__Corynebacteriales	f__Nocardiaceae	g__Rhodococcus	s__Rhodococcus_ruber	0	0	0	0	0	0	0	0	0	8	0	0	0	0	0	0	0	0	0	0
k__Bacteria	p__Actinobacteria	c__Actinomycetia	o__Corynebacteriales	f__Nocardiaceae	g__Rhodococcus	s__Rhodococcus_sp._AG1013	0	0	0	4	0	0	0	0	0	0	0	0	0	0	0	0	0	0	0	0
k__Bacteria	p__Actinobacteria	c__Actinomycetia	o__Corynebacteriales	f__Nocardiaceae	g__Rhodococcus	s__Rhodococcus_sp._AW25M09	4	0	0	4	0	0	0	0	0	0	0	0	0	0	0	0	0	0	0	0
k__Bacteria	p__Actinobacteria	c__Actinomycetia	o__Corynebacteriales	f__Nocardiaceae	g__Rhodococcus	s__Rhodococcus_sp._M8	0	0	0	0	0	0	0	12	2234	0	0	0	0	0	0	0	0	116	0	0
k__Bacteria	p__Actinobacteria	c__Actinomycetia	o__Corynebacteriales	f__Nocardiaceae	g__Rhodococcus	s__Rhodococcus_sp._OK302	0	0	0	0	0	0	0	0	0	12	0	0	0	0	0	0	0	0	0	0
k__Bacteria	p__Actinobacteria	c__Actinomycetia	o__Corynebacteriales	f__Nocardiaceae	g__Rhodococcus	s__Rhodococcus_sp._P27	0	0	0	21	0	0	2	0	2	8	0	0	0	0	0	0	0	0	0	0
k__Bacteria	p__Actinobacteria	c__Actinomycetia	o__Corynebacteriales	f__Nocardiaceae	g__Rhodococcus	s__Rhodococcus_sp._RD6.2	0	0	0	21	0	0	0	0	0	0	0	0	0	0	0	0	0	0	0	0
k__Bacteria	p__Actinobacteria	c__Actinomycetia	o__Corynebacteriales	f__Nocardiaceae	g__Rhodococcus	s__Rhodococcus_sp._WMMA185	0	0	0	0	0	0	6	0	0	0	0	0	0	0	0	0	0	0	0	0
k__Bacteria	p__Actinobacteria	c__Actinomycetia	o__Corynebacteriales	f__Nocardiaceae	g__Rhodococcus	s__Rhodococcus_tukisamuensis	0	0	0	0	0	0	0	0	0	3	0	0	0	0	0	0	0	0	0	0
k__Bacteria	p__Actinobacteria	c__Actinomycetia	o__Corynebacteriales	f__Nocardiaceae	g__Rhodococcus	s__Unclassified	15	0	0	0	0	0	0	0	0	0	0	0	0	0	0	0	0	0	0	0
k__Bacteria	p__Actinobacteria	c__Actinomycetia	o__Corynebacteriales	f__Nocardiaceae	g__Williamsia	s__Williamsia_sp._1135	0	0	0	3	0	0	0	0	0	0	0	0	0	0	0	0	0	0	0	0
k__Bacteria	p__Actinobacteria	c__Actinomycetia	o__Corynebacteriales	f__Segniliparaceae	g__Segniliparus	s__Segniliparus_rugosus	0	0	0	0	0	0	0	0	0	0	0	0	0	0	0	3	0	0	0	0
k__Bacteria	p__Actinobacteria	c__Actinomycetia	o__Corynebacteriales	f__Unclassified	g__Unclassified	s__Unclassified	0	0	0	11	0	0	0	0	0	0	0	0	0	0	0	0	0	0	0	0
k__Bacteria	p__Actinobacteria	c__Actinomycetia	o__Cryptosporangiales	f__Cryptosporangiaceae	g__Cryptosporangium	s__Cryptosporangium_aurantiacum	0	0	0	0	0	0	6	0	0	0	0	0	0	0	0	0	0	0	0	0
k__Bacteria	p__Actinobacteria	c__Actinomycetia	o__Frankiales	f__Frankiaceae	g__Frankia	s__Frankia_canadensis	0	0	0	0	1709	0	0	623	0	0	0	0	0	0	0	0	0	0	0	0
k__Bacteria	p__Actinobacteria	c__Actinomycetia	o__Frankiales	f__Frankiaceae	g__Frankia	s__Frankia_sp._BMG5.23	0	0	0	12	0	0	0	0	0	0	0	0	0	0	0	0	0	0	0	0
k__Bacteria	p__Actinobacteria	c__Actinomycetia	o__Frankiales	f__Frankiaceae	g__Frankia	s__Frankia_sp._BMG5.36	0	0	0	10	0	0	0	0	0	0	0	0	0	0	0	0	0	0	0	0
k__Bacteria	p__Actinobacteria	c__Actinomycetia	o__Frankiales	f__Frankiaceae	g__Frankia	s__Frankia_sp._Ea1.12	0	0	0	0	0	0	76	0	0	0	0	0	0	0	0	0	0	0	0	0
k__Bacteria	p__Actinobacteria	c__Actinomycetia	o__Frankiales	f__Frankiaceae	g__Frankia	s__Frankia_sp._R43	0	109	0	0	0	0	0	0	0	0	0	0	0	0	0	0	0	0	0	0
k__Bacteria	p__Actinobacteria	c__Actinomycetia	o__Frankiales	f__Unclassified	g__Unclassified	s__Frankiales_bacterium	0	4	0	0	0	0	0	0	0	0	0	0	0	0	0	0	0	0	0	0
k__Bacteria	p__Actinobacteria	c__Actinomycetia	o__Geodermatophilales	f__Geodermatophilaceae	g__Blastococcus	s__Blastococcus_litoris	0	0	0	0	0	0	0	0	0	0	0	0	0	0	0	0	0	0	0	25
k__Bacteria	p__Actinobacteria	c__Actinomycetia	o__Geodermatophilales	f__Geodermatophilaceae	g__Geodermatophilus	s__Geodermatophilus_africanus	0	0	0	0	0	0	0	0	0	20	0	0	0	0	0	0	0	0	0	0
k__Bacteria	p__Actinobacteria	c__Actinomycetia	o__Geodermatophilales	f__Geodermatophilaceae	g__Geodermatophilus	s__Geodermatophilus_obscurus	0	0	0	0	0	0	0	0	0	0	0	0	0	7	0	0	0	0	0	0
k__Bacteria	p__Actinobacteria	c__Actinomycetia	o__Geodermatophilales	f__Geodermatophilaceae	g__Unclassified	s__Geodermatophilaceae_bacterium_URHB0048	0	0	0	0	0	0	0	0	0	0	0	0	0	0	0	0	0	0	0	0
k__Bacteria	p__Actinobacteria	c__Actinomycetia	o__Glycomycetales	f__Glycomycetaceae	g__Glycomyces	s__Glycomyces_xiaoerkulensis	0	0	0	4	0	0	0	0	0	0	0	0	0	0	0	0	0	0	0	0
k__Bacteria	p__Actinobacteria	c__Actinomycetia	o__Jiangellales	f__Jiangellaceae	g__Jiangella	s__Jiangella_anatolica	4	0	0	0	0	0	0	0	0	0	0	0	0	0	0	0	0	0	0	0
k__Bacteria	p__Actinobacteria	c__Actinomycetia	o__Jiangellales	f__Jiangellaceae	g__Phytoactinopolyspora	s__Phytoactinopolyspora_halophila	0	0	0	5	0	0	0	0	0	0	0	0	0	0	0	0	0	0	0	0
k__Bacteria	p__Actinobacteria	c__Actinomycetia	o__Kineosporiales	f__Kineosporiaceae	g__Kineococcus	s__Kineococcus_radiotolerans	0	0	0	0	0	0	0	0	0	5	0	0	0	0	0	0	0	0	0	0
k__Bacteria	p__Actinobacteria	c__Actinomycetia	o__Micrococcales	f__Beutenbergiaceae	g__Miniimonas	s__Miniimonas_sp._S16	0	0	0	3	0	0	0	0	0	0	0	0	0	0	0	0	0	0	0	0
k__Bacteria	p__Actinobacteria	c__Actinomycetia	o__Micrococcales	f__Beutenbergiaceae	g__Serinibacter	s__Serinibacter_arcticus	0	0	0	0	0	0	0	0	0	4	0	0	0	0	0	0	0	0	0	0
k__Bacteria	p__Actinobacteria	c__Actinomycetia	o__Micrococcales	f__Bogoriellaceae	g__Georgenia	s__Georgenia_satyanarayanai	0	26	0	0	0	0	0	0	0	0	0	0	0	0	0	0	0	0	0	0
k__Bacteria	p__Actinobacteria	c__Actinomycetia	o__Micrococcales	f__Bogoriellaceae	g__Georgenia	s__Georgenia_sp._SYP_B2076	48	0	0	0	0	0	0	0	0	0	0	0	0	0	0	0	0	0	0	0
k__Bacteria	p__Actinobacteria	c__Actinomycetia	o__Micrococcales	f__Bogoriellaceae	g__Georgenia	s__Unclassified	0	0	0	5	0	0	0	0	0	0	0	0	0	0	0	0	0	0	0	0
k__Bacteria	p__Actinobacteria	c__Actinomycetia	o__Micrococcales	f__Brevibacteriaceae	g__Brevibacterium	s__Brevibacterium_aurantiacum	0	8	0	0	0	0	0	0	0	0	0	0	0	0	0	0	0	0	0	0
k__Bacteria	p__Actinobacteria	c__Actinomycetia	o__Micrococcales	f__Brevibacteriaceae	g__Brevibacterium	s__Brevibacterium_ihuae	0	0	0	0	0	0	0	16	0	0	0	0	0	0	0	0	0	0	0	0
k__Bacteria	p__Actinobacteria	c__Actinomycetia	o__Micrococcales	f__Brevibacteriaceae	g__Brevibacterium	s__Brevibacterium_paucivorans	0	0	0	0	0	0	0	0	6	0	0	0	0	0	0	0	0	0	0	0
k__Bacteria	p__Actinobacteria	c__Actinomycetia	o__Micrococcales	f__Brevibacteriaceae	g__Brevibacterium	s__Brevibacterium_ravenspurgense	0	0	0	0	0	0	0	0	0	5	0	0	0	0	0	0	0	0	0	0
k__Bacteria	p__Actinobacteria	c__Actinomycetia	o__Micrococcales	f__Brevibacteriaceae	g__Brevibacterium	s__Brevibacterium_senegalense	0	0	0	0	0	0	0	0	0	0	0	0	0	0	0	0	0	0	0	0
k__Bacteria	p__Actinobacteria	c__Actinomycetia	o__Micrococcales	f__Brevibacteriaceae	g__Brevibacterium	s__Brevibacterium_sp._Mu109	0	0	0	0	0	0	0	0	0	8	0	0	0	0	0	0	0	0	0	0
k__Bacteria	p__Actinobacteria	c__Actinomycetia	o__Micrococcales	f__Cellulomonadaceae	g__Cellulomonas	s__Cellulomonas_flavigena	0	71	7	79	0	0	5	0	0	45	0	0	0	0	0	0	0	0	0	0
k__Bacteria	p__Actinobacteria	c__Actinomycetia	o__Micrococcales	f__Cellulomonadaceae	g__Cellulomonas	s__Cellulomonas_sp._HLT2_17	0	13	0	0	0	0	0	0	0	10	0	0	0	0	0	0	0	0	0	0
k__Bacteria	p__Actinobacteria	c__Actinomycetia	o__Micrococcales	f__Cellulomonadaceae	g__Cellulomonas	s__Cellulomonas_sp._HZM	0	15	0	0	0	0	0	0	0	0	0	0	0	0	0	0	0	0	0	0
k__Bacteria	p__Actinobacteria	c__Actinomycetia	o__Micrococcales	f__Cellulomonadaceae	g__Cellulomonas	s__Cellulomonas_sp._PSBB021	0	0	0	13	0	0	0	0	0	0	0	0	0	0	0	0	0	0	0	0
k__Bacteria	p__Actinobacteria	c__Actinomycetia	o__Micrococcales	f__Cellulomonadaceae	g__Cellulomonas	s__Cellulomonas_sp._WB94	0	21	0	0	0	0	0	0	0	0	0	0	0	0	0	0	0	0	0	0
k__Bacteria	p__Actinobacteria	c__Actinomycetia	o__Micrococcales	f__Cellulomonadaceae	g__Oerskovia	s__Oerskovia_sp._Root22	0	0	0	0	0	0	0	0	0	0	0	0	0	0	0	0	0	0	0	0
k__Bacteria	p__Actinobacteria	c__Actinomycetia	o__Micrococcales	f__Demequinaceae	g__Demequina	s__Demequina_globuliformis	0	0	0	4	0	0	0	0	0	0	0	0	0	0	0	0	0	0	0	0
k__Bacteria	p__Actinobacteria	c__Actinomycetia	o__Micrococcales	f__Demequinaceae	g__Demequina	s__Demequina_lutea	0	0	0	0	0	0	5	0	0	0	0	0	0	0	0	0	0	0	0	0
k__Bacteria	p__Actinobacteria	c__Actinomycetia	o__Micrococcales	f__Demequinaceae	g__Demequina	s__Demequina_oxidasica	0	0	0	0	0	0	0	0	0	4	0	0	0	0	0	0	0	0	0	0
k__Bacteria	p__Actinobacteria	c__Actinomycetia	o__Micrococcales	f__Demequinaceae	g__Demequina	s__Demequina_sp._NBRC_110056	0	0	0	56	0	0	0	0	0	0	0	0	0	0	0	0	0	0	0	0
k__Bacteria	p__Actinobacteria	c__Actinomycetia	o__Micrococcales	f__Dermabacteraceae	g__Brachybacterium	s__Brachybacterium_avium	0	0	0	5	0	0	0	0	0	0	0	0	0	0	0	0	0	0	0	0
k__Bacteria	p__Actinobacteria	c__Actinomycetia	o__Micrococcales	f__Dermabacteraceae	g__Brachybacterium	s__Brachybacterium_endophyticum	0	0	0	0	0	0	0	0	0	0	0	0	0	0	0	0	0	0	0	0
k__Bacteria	p__Actinobacteria	c__Actinomycetia	o__Micrococcales	f__Dermabacteraceae	g__Brachybacterium	s__Brachybacterium_faecium	0	17	0	3	0	0	0	0	0	0	0	0	0	0	0	0	0	0	0	0
k__Bacteria	p__Actinobacteria	c__Actinomycetia	o__Micrococcales	f__Dermabacteraceae	g__Brachybacterium	s__Brachybacterium_muris	11	0	0	0	0	0	0	0	0	0	0	0	0	0	0	0	0	0	0	0
k__Bacteria	p__Actinobacteria	c__Actinomycetia	o__Micrococcales	f__Dermabacteraceae	g__Brachybacterium	s__Brachybacterium_phenoliresistens	0	0	0	32	0	0	0	0	0	0	0	0	0	0	0	0	0	0	0	0
k__Bacteria	p__Actinobacteria	c__Actinomycetia	o__Micrococcales	f__Dermabacteraceae	g__Brachybacterium	s__Brachybacterium_sp._EE_P12	6	0	0	0	0	0	0	0	0	0	0	0	0	0	0	0	0	0	0	0
k__Bacteria	p__Actinobacteria	c__Actinomycetia	o__Micrococcales	f__Dermabacteraceae	g__Dermabacter	s__Dermabacter_hominis	0	0	0	4	0	0	0	0	0	0	0	0	0	0	0	0	0	0	0	0
k__Bacteria	p__Actinobacteria	c__Actinomycetia	o__Micrococcales	f__Dermabacteraceae	g__Dermabacter	s__Dermabacter_sp._HFH0086	0	23	0	0	0	0	0	0	0	4	0	0	0	0	0	0	0	0	0	0
k__Bacteria	p__Actinobacteria	c__Actinomycetia	o__Micrococcales	f__Dermabacteraceae	g__Dermabacter	s__Dermabacter_vaginalis	0	0	0	0	0	0	6	0	0	0	0	0	0	0	0	0	5	0	0	0
k__Bacteria	p__Actinobacteria	c__Actinomycetia	o__Micrococcales	f__Dermacoccaceae	g__Flexivirga	s__Flexivirga_caeni	0	0	0	0	0	0	0	6	0	0	0	0	0	0	0	0	0	0	0	0
k__Bacteria	p__Actinobacteria	c__Actinomycetia	o__Micrococcales	f__Dermatophilaceae	g__Mobilicoccus	s__Mobilicoccus_pelagius	0	0	0	0	0	0	0	0	0	3	0	0	0	0	0	0	0	0	0	0
k__Bacteria	p__Actinobacteria	c__Actinomycetia	o__Micrococcales	f__Intrasporangiaceae	g__Intrasporangium	s__Intrasporangium_oryzae	0	0	0	0	0	0	0	12	0	0	0	0	0	0	2	0	0	0	0	0
k__Bacteria	p__Actinobacteria	c__Actinomycetia	o__Micrococcales	f__Intrasporangiaceae	g__Janibacter	s__Janibacter_limosus	0	0	0	3	0	0	0	0	0	0	0	0	0	0	0	0	0	0	0	0
k__Bacteria	p__Actinobacteria	c__Actinomycetia	o__Micrococcales	f__Intrasporangiaceae	g__Knoellia	s__Knoellia_remsis	0	0	0	25	0	0	0	0	0	0	0	0	0	0	0	0	0	0	0	0
k__Bacteria	p__Actinobacteria	c__Actinomycetia	o__Micrococcales	f__Intrasporangiaceae	g__Terrabacter	s__Terrabacter_sp._28	0	0	0	0	0	0	62	0	0	0	0	0	0	0	0	0	0	0	3	0
k__Bacteria	p__Actinobacteria	c__Actinomycetia	o__Micrococcales	f__Intrasporangiaceae	g__Tetrasphaera	s__Tetrasphaera_australiensis	0	0	0	0	0	0	0	0	0	0	0	0	0	0	0	0	0	0	0	0
k__Bacteria	p__Actinobacteria	c__Actinomycetia	o__Micrococcales	f__Intrasporangiaceae	g__Tetrasphaera	s__Tetrasphaera_japonica	16	0	0	10	0	0	0	0	0	0	0	0	0	0	0	0	0	0	0	80
k__Bacteria	p__Actinobacteria	c__Actinomycetia	o__Micrococcales	f__Jonesiaceae	g__Flavimobilis	s__Flavimobilis_soli	4	0	0	0	0	0	0	0	0	0	0	0	0	0	0	0	0	0	0	0
k__Bacteria	p__Actinobacteria	c__Actinomycetia	o__Micrococcales	f__Kytococcaceae	g__Kytococcus	s__Kytococcus_aerolatus	0	0	0	0	0	0	0	0	0	3	0	0	0	0	0	0	0	0	0	0
k__Bacteria	p__Actinobacteria	c__Actinomycetia	o__Micrococcales	f__Kytococcaceae	g__Kytococcus	s__Kytococcus_sedentarius	69	871	3	322	0	8	22	0	11	304	0	0	0	0	0	0	0	0	0	0
k__Bacteria	p__Actinobacteria	c__Actinomycetia	o__Micrococcales	f__Microbacteriaceae	g__Agromyces	s__Agromyces_atrinae	0	3	0	0	0	0	0	0	0	0	0	0	0	0	0	0	0	0	0	0
k__Bacteria	p__Actinobacteria	c__Actinomycetia	o__Micrococcales	f__Microbacteriaceae	g__Candidatus_Lumbricidophila	s__Candidatus_Lumbricidophila_eiseniae	0	40	0	0	0	0	0	0	0	33	0	0	0	0	0	0	0	0	0	0
k__Bacteria	p__Actinobacteria	c__Actinomycetia	o__Micrococcales	f__Microbacteriaceae	g__Clavibacter	s__Clavibacter_michiganensis	0	0	0	0	0	0	0	0	0	20	0	0	0	0	0	0	0	0	0	0
k__Bacteria	p__Actinobacteria	c__Actinomycetia	o__Micrococcales	f__Microbacteriaceae	g__Cryobacterium	s__Cryobacterium_levicorallinum	0	0	0	0	0	0	5	0	0	0	0	0	0	0	0	0	0	0	0	0
k__Bacteria	p__Actinobacteria	c__Actinomycetia	o__Micrococcales	f__Microbacteriaceae	g__Cryobacterium	s__Cryobacterium_luteum	0	0	0	7	0	0	0	0	0	0	0	0	0	0	0	0	0	0	0	0
k__Bacteria	p__Actinobacteria	c__Actinomycetia	o__Micrococcales	f__Microbacteriaceae	g__Curtobacterium	s__Curtobacterium_ammoniigenes	0	16	0	5	0	0	0	0	0	0	0	0	0	0	0	0	0	0	0	0
k__Bacteria	p__Actinobacteria	c__Actinomycetia	o__Micrococcales	f__Microbacteriaceae	g__Curtobacterium	s__Curtobacterium_oceanosedimentum	0	0	0	0	0	0	0	0	0	3	0	0	0	0	0	0	0	0	0	0
k__Bacteria	p__Actinobacteria	c__Actinomycetia	o__Micrococcales	f__Microbacteriaceae	g__Curtobacterium	s__Curtobacterium_sp._314Chir4.1	0	0	0	0	0	0	0	0	0	0	0	0	0	0	0	0	0	0	0	0
k__Bacteria	p__Actinobacteria	c__Actinomycetia	o__Micrococcales	f__Microbacteriaceae	g__Curtobacterium	s__Curtobacterium_sp._Leaf261	0	0	0	29	0	0	0	0	0	18	0	0	0	0	0	0	0	0	0	0
k__Bacteria	p__Actinobacteria	c__Actinomycetia	o__Micrococcales	f__Microbacteriaceae	g__Curtobacterium	s__Curtobacterium_sp._MCBD17_021	3	0	0	0	0	0	0	0	0	0	0	0	0	0	0	0	0	0	0	0
k__Bacteria	p__Actinobacteria	c__Actinomycetia	o__Micrococcales	f__Microbacteriaceae	g__Curtobacterium	s__Curtobacterium_sp._MCSS17_007	0	0	0	0	0	0	9	0	0	0	0	0	0	0	0	0	0	0	0	0
k__Bacteria	p__Actinobacteria	c__Actinomycetia	o__Micrococcales	f__Microbacteriaceae	g__Curtobacterium	s__Curtobacterium_sp._S6	0	0	0	0	0	0	7	0	0	0	0	0	0	0	0	0	0	0	0	0
k__Bacteria	p__Actinobacteria	c__Actinomycetia	o__Micrococcales	f__Microbacteriaceae	g__Frondihabitans	s__Frondihabitans_australicus	0	8	0	0	0	0	0	0	0	0	0	0	0	0	0	0	0	0	0	0
k__Bacteria	p__Actinobacteria	c__Actinomycetia	o__Micrococcales	f__Microbacteriaceae	g__Glaciibacter	s__Glaciibacter_superstes	0	12	0	0	0	0	0	0	0	0	0	0	0	0	0	0	0	0	0	0
k__Bacteria	p__Actinobacteria	c__Actinomycetia	o__Micrococcales	f__Microbacteriaceae	g__Gulosibacter	s__Gulosibacter_sp._10	8	4	0	0	0	0	0	0	0	0	0	0	0	0	0	0	0	0	0	0
k__Bacteria	p__Actinobacteria	c__Actinomycetia	o__Micrococcales	f__Microbacteriaceae	g__Gulosibacter	s__Gulosibacter_sp._Marseille_P7157	4	0	0	0	0	0	0	0	0	0	0	0	0	0	0	0	0	0	0	0
k__Bacteria	p__Actinobacteria	c__Actinomycetia	o__Micrococcales	f__Microbacteriaceae	g__Leifsonia	s__Leifsonia_xyli	0	19	0	0	0	0	0	0	0	0	0	0	0	0	0	0	0	0	0	0
k__Bacteria	p__Actinobacteria	c__Actinomycetia	o__Micrococcales	f__Microbacteriaceae	g__Leucobacter	s__Leucobacter_chironomi	0	0	0	0	0	0	0	0	0	0	0	0	0	0	0	0	0	0	0	0
k__Bacteria	p__Actinobacteria	c__Actinomycetia	o__Micrococcales	f__Microbacteriaceae	g__Leucobacter	s__Leucobacter_chromiiresistens	0	0	0	0	0	0	0	0	0	3	0	0	0	0	0	0	0	0	0	0
k__Bacteria	p__Actinobacteria	c__Actinomycetia	o__Micrococcales	f__Microbacteriaceae	g__Leucobacter	s__Leucobacter_komagatae	0	19	0	29	0	0	0	0	0	8	0	0	0	0	0	0	0	0	0	0
k__Bacteria	p__Actinobacteria	c__Actinomycetia	o__Micrococcales	f__Microbacteriaceae	g__Leucobacter	s__Leucobacter_luti	31	0	0	0	0	0	4	0	0	13	0	0	0	0	0	0	0	0	0	0
k__Bacteria	p__Actinobacteria	c__Actinomycetia	o__Micrococcales	f__Microbacteriaceae	g__Leucobacter	s__Leucobacter_sp._UCD_THU	0	0	0	0	0	0	0	0	0	0	0	0	0	0	0	0	0	0	0	0
k__Bacteria	p__Actinobacteria	c__Actinomycetia	o__Micrococcales	f__Microbacteriaceae	g__Leucobacter	s__Leucobacter_triazinivorans	0	0	0	0	0	0	0	0	0	0	0	0	0	0	0	0	0	0	0	0
k__Bacteria	p__Actinobacteria	c__Actinomycetia	o__Micrococcales	f__Microbacteriaceae	g__Microbacterium	s__Microbacterium_arborescens	38	51	126	94	26	82	19	110	280	139	2	85	62	102	111	100	150	68	101	108
k__Bacteria	p__Actinobacteria	c__Actinomycetia	o__Micrococcales	f__Microbacteriaceae	g__Microbacterium	s__Microbacterium_esteraromaticum	27	26	110	35	7	15	7	122	26	26	0	0	23	83	0	18	59	36	4	81
k__Bacteria	p__Actinobacteria	c__Actinomycetia	o__Micrococcales	f__Microbacteriaceae	g__Microbacterium	s__Microbacterium_gubbeenense	0	3	0	12	0	0	0	0	0	0	0	0	0	0	0	0	0	0	0	0
k__Bacteria	p__Actinobacteria	c__Actinomycetia	o__Micrococcales	f__Microbacteriaceae	g__Microbacterium	s__Microbacterium_indicum	0	0	0	4	0	0	0	0	0	0	0	0	0	0	0	0	0	0	0	0
k__Bacteria	p__Actinobacteria	c__Actinomycetia	o__Micrococcales	f__Microbacteriaceae	g__Microbacterium	s__Microbacterium_sp._13_71_7	0	0	0	0	0	0	0	0	0	3	0	0	0	0	0	0	0	0	0	0
k__Bacteria	p__Actinobacteria	c__Actinomycetia	o__Micrococcales	f__Microbacteriaceae	g__Microbacterium	s__Microbacterium_sp._AISO3	0	0	0	0	0	0	55	50	0	0	0	0	0	0	60	0	6	0	0	0
k__Bacteria	p__Actinobacteria	c__Actinomycetia	o__Micrococcales	f__Microbacteriaceae	g__Microbacterium	s__Microbacterium_sp._B24	0	0	0	0	0	0	0	0	0	34	0	0	0	0	0	0	0	0	0	0
k__Bacteria	p__Actinobacteria	c__Actinomycetia	o__Micrococcales	f__Microbacteriaceae	g__Microbacterium	s__Microbacterium_sp._Leaf151	0	5	0	0	0	0	2	0	0	25	0	0	0	0	0	0	0	0	0	0
k__Bacteria	p__Actinobacteria	c__Actinomycetia	o__Micrococcales	f__Microbacteriaceae	g__Microbacterium	s__Microbacterium_sp._Leaf436	0	27	0	0	0	0	0	0	0	0	0	0	0	0	0	0	0	0	0	0
k__Bacteria	p__Actinobacteria	c__Actinomycetia	o__Micrococcales	f__Microbacteriaceae	g__Microbacterium	s__Microbacterium_sp._SCN_71_17	0	0	0	3	0	0	0	0	0	0	0	0	0	0	0	0	0	0	0	0
k__Bacteria	p__Actinobacteria	c__Actinomycetia	o__Micrococcales	f__Microbacteriaceae	g__Microterricola	s__Microterricola_viridarii	0	0	0	0	0	0	0	0	0	0	0	0	0	0	0	0	0	0	0	0
k__Bacteria	p__Actinobacteria	c__Actinomycetia	o__Micrococcales	f__Microbacteriaceae	g__Mycetocola	s__Mycetocola_miduiensis	0	0	0	0	0	0	0	0	0	0	0	0	0	0	0	0	0	0	0	3
k__Bacteria	p__Actinobacteria	c__Actinomycetia	o__Micrococcales	f__Microbacteriaceae	g__Mycetocola	s__Mycetocola_tolaasinivorans	5	0	0	0	0	0	0	0	0	0	0	0	0	0	0	0	0	0	0	0
k__Bacteria	p__Actinobacteria	c__Actinomycetia	o__Micrococcales	f__Microbacteriaceae	g__Plantibacter	s__Plantibacter_flavus	0	99	0	0	0	0	0	0	0	10	0	0	0	0	0	0	0	0	0	0
k__Bacteria	p__Actinobacteria	c__Actinomycetia	o__Micrococcales	f__Microbacteriaceae	g__Pseudoclavibacter	s__Pseudoclavibacter_soli	0	0	0	0	0	0	7	0	0	0	0	0	0	0	0	0	0	0	0	0
k__Bacteria	p__Actinobacteria	c__Actinomycetia	o__Micrococcales	f__Microbacteriaceae	g__Pseudoclavibacter	s__Pseudoclavibacter_sp._RFBA6	0	0	0	5	0	0	0	0	0	0	0	0	0	0	0	0	0	0	0	0
k__Bacteria	p__Actinobacteria	c__Actinomycetia	o__Micrococcales	f__Microbacteriaceae	g__Rathayibacter	s__Rathayibacter_festucae	0	38	0	0	0	0	0	0	0	0	0	0	0	0	0	0	0	0	0	0
k__Bacteria	p__Actinobacteria	c__Actinomycetia	o__Micrococcales	f__Microbacteriaceae	g__Rathayibacter	s__Rathayibacter_sp._AY1F3	0	0	0	4	0	0	8	0	0	0	0	0	0	0	0	0	0	0	0	0
k__Bacteria	p__Actinobacteria	c__Actinomycetia	o__Micrococcales	f__Microbacteriaceae	g__Rathayibacter	s__Rathayibacter_sp._PhB127	0	32	0	0	0	0	0	0	0	0	0	0	0	0	0	0	0	0	0	0
k__Bacteria	p__Actinobacteria	c__Actinomycetia	o__Micrococcales	f__Microbacteriaceae	g__Rathayibacter	s__Unclassified	0	20	0	0	0	0	0	0	0	0	0	0	0	0	0	0	0	0	0	0
k__Bacteria	p__Actinobacteria	c__Actinomycetia	o__Micrococcales	f__Microbacteriaceae	g__Subtercola	s__Subtercola_sp._Z020	0	0	0	0	0	0	34	0	0	0	0	0	0	0	0	0	0	0	0	0
k__Bacteria	p__Actinobacteria	c__Actinomycetia	o__Micrococcales	f__Micrococcaceae	g__Arthrobacter	s__Arthrobacter_castelli	0	31	0	11	0	0	0	0	0	13	0	0	0	0	0	0	0	0	0	0
k__Bacteria	p__Actinobacteria	c__Actinomycetia	o__Micrococcales	f__Micrococcaceae	g__Arthrobacter	s__Arthrobacter_crystallopoietes	162	94	0	22	0	5	72	0	7	33	0	0	0	0	0	0	0	0	0	0
k__Bacteria	p__Actinobacteria	c__Actinomycetia	o__Micrococcales	f__Micrococcaceae	g__Arthrobacter	s__Arthrobacter_sp._AFG7.2	0	12	0	12	0	0	0	0	0	0	0	0	0	0	0	0	0	0	0	0
k__Bacteria	p__Actinobacteria	c__Actinomycetia	o__Micrococcales	f__Micrococcaceae	g__Arthrobacter	s__Arthrobacter_sp._Bz4	0	0	0	0	0	0	0	0	0	0	0	0	0	0	0	0	0	0	0	0
k__Bacteria	p__Actinobacteria	c__Actinomycetia	o__Micrococcales	f__Micrococcaceae	g__Arthrobacter	s__Arthrobacter_sp._D2	26	24	0	15	26	171	0	156	67	27	0	18	0	38	8	34	38	0	57	0
k__Bacteria	p__Actinobacteria	c__Actinomycetia	o__Micrococcales	f__Micrococcaceae	g__Arthrobacter	s__Arthrobacter_sp._DWC3	12	18	20	13	10	67	13	109	104	66	0	0	30	0	44	13	22	17	49	4
k__Bacteria	p__Actinobacteria	c__Actinomycetia	o__Micrococcales	f__Micrococcaceae	g__Arthrobacter	s__Arthrobacter_sp._EpRS71	0	0	0	0	0	0	0	0	0	0	0	0	0	0	0	0	0	0	0	0
k__Bacteria	p__Actinobacteria	c__Actinomycetia	o__Micrococcales	f__Micrococcaceae	g__Arthrobacter	s__Arthrobacter_sp._Hiyo8	0	0	0	0	0	0	0	0	0	0	0	0	0	0	0	0	0	0	0	0
k__Bacteria	p__Actinobacteria	c__Actinomycetia	o__Micrococcales	f__Micrococcaceae	g__Arthrobacter	s__Arthrobacter_sp._Leaf234	0	5	0	0	0	0	0	0	0	0	0	0	0	0	0	0	0	0	0	0
k__Bacteria	p__Actinobacteria	c__Actinomycetia	o__Micrococcales	f__Micrococcaceae	g__Arthrobacter	s__Arthrobacter_sp._MWB30	0	80	0	0	0	0	45	0	0	197	0	0	0	0	0	0	0	0	0	0
k__Bacteria	p__Actinobacteria	c__Actinomycetia	o__Micrococcales	f__Micrococcaceae	g__Arthrobacter	s__Arthrobacter_sp._MYb227	0	9	0	0	0	0	0	0	0	0	0	0	0	0	0	0	0	0	0	0
k__Bacteria	p__Actinobacteria	c__Actinomycetia	o__Micrococcales	f__Micrococcaceae	g__Arthrobacter	s__Arthrobacter_sp._SX1312	0	0	0	0	0	0	6	5	0	0	0	8	0	5	0	0	5	0	0	0
k__Bacteria	p__Actinobacteria	c__Actinomycetia	o__Micrococcales	f__Micrococcaceae	g__Arthrobacter	s__Arthrobacter_sp._Soil761	0	0	0	0	0	0	0	0	0	4	0	0	0	0	0	0	0	0	0	0
k__Bacteria	p__Actinobacteria	c__Actinomycetia	o__Micrococcales	f__Micrococcaceae	g__Arthrobacter	s__Arthrobacter_sp._Soil763	0	5	0	0	0	0	0	0	0	0	0	0	0	0	0	0	0	0	0	0
k__Bacteria	p__Actinobacteria	c__Actinomycetia	o__Micrococcales	f__Micrococcaceae	g__Arthrobacter	s__Arthrobacter_sp._Soil764	0	0	0	0	0	14	0	0	0	0	0	0	0	0	0	0	0	0	0	0
k__Bacteria	p__Actinobacteria	c__Actinomycetia	o__Micrococcales	f__Micrococcaceae	g__Arthrobacter	s__Arthrobacter_sp._UNC362MFTsu5.1	0	0	0	0	0	0	0	0	0	0	0	0	0	0	0	0	0	0	0	0
k__Bacteria	p__Actinobacteria	c__Actinomycetia	o__Micrococcales	f__Micrococcaceae	g__Arthrobacter	s__Arthrobacter_sp._YC_RL1	0	0	0	3	0	0	0	0	0	0	0	0	0	0	0	0	0	0	0	0
k__Bacteria	p__Actinobacteria	c__Actinomycetia	o__Micrococcales	f__Micrococcaceae	g__Arthrobacter	s__Arthrobacter_sp._cf158	0	14	0	0	0	0	0	0	0	0	0	0	0	0	0	0	0	0	0	0
k__Bacteria	p__Actinobacteria	c__Actinomycetia	o__Micrococcales	f__Micrococcaceae	g__Arthrobacter	s__Arthrobacter_stackebrandtii	0	7	0	0	0	51	9	35	0	112	0	0	0	0	4	0	15	0	6	0
k__Bacteria	p__Actinobacteria	c__Actinomycetia	o__Micrococcales	f__Micrococcaceae	g__Arthrobacter	s__Arthrobacter_woluwensis	0	5	0	0	0	0	0	0	0	0	0	0	0	0	0	0	0	0	0	0
k__Bacteria	p__Actinobacteria	c__Actinomycetia	o__Micrococcales	f__Micrococcaceae	g__Arthrobacter	s__Unclassified	0	5	0	0	0	7	0	0	0	27	0	0	0	0	0	0	0	0	0	0
k__Bacteria	p__Actinobacteria	c__Actinomycetia	o__Micrococcales	f__Micrococcaceae	g__Enteractinococcus	s__Enteractinococcus_helveticum	0	0	0	0	0	0	0	0	0	10	0	0	0	0	0	0	0	0	0	0
k__Bacteria	p__Actinobacteria	c__Actinomycetia	o__Micrococcales	f__Micrococcaceae	g__Glutamicibacter	s__Glutamicibacter_arilaitensis	0	0	4	15	0	0	7	0	0	0	0	0	0	0	0	0	0	0	0	0
k__Bacteria	p__Actinobacteria	c__Actinomycetia	o__Micrococcales	f__Micrococcaceae	g__Glutamicibacter	s__Glutamicibacter_sp._BW77	0	34	0	4	0	0	0	0	0	0	0	0	0	0	0	0	0	0	0	0
k__Bacteria	p__Actinobacteria	c__Actinomycetia	o__Micrococcales	f__Micrococcaceae	g__Kocuria	s__Kocuria_flava	0	5	0	0	0	0	0	0	0	0	0	0	0	0	0	0	0	0	0	0
k__Bacteria	p__Actinobacteria	c__Actinomycetia	o__Micrococcales	f__Micrococcaceae	g__Kocuria	s__Kocuria_palustris	0	28	0	0	0	0	0	0	0	7	0	0	0	0	0	0	0	0	0	0
k__Bacteria	p__Actinobacteria	c__Actinomycetia	o__Micrococcales	f__Micrococcaceae	g__Kocuria	s__Kocuria_rhizophila	7	0	0	6	0	0	0	0	5	11	0	0	0	0	0	0	0	0	0	0
k__Bacteria	p__Actinobacteria	c__Actinomycetia	o__Micrococcales	f__Micrococcaceae	g__Kocuria	s__Kocuria_rosea	0	0	0	0	0	5	0	0	0	0	0	0	0	0	0	0	0	0	0	0
k__Bacteria	p__Actinobacteria	c__Actinomycetia	o__Micrococcales	f__Micrococcaceae	g__Kocuria	s__Kocuria_soli	4	9	0	0	0	0	0	0	0	0	0	0	0	0	0	0	0	0	0	0
k__Bacteria	p__Actinobacteria	c__Actinomycetia	o__Micrococcales	f__Micrococcaceae	g__Kocuria	s__Kocuria_sp._CNJ_770	0	17	0	0	0	0	0	0	0	0	0	0	0	0	0	0	0	0	0	0
k__Bacteria	p__Actinobacteria	c__Actinomycetia	o__Micrococcales	f__Micrococcaceae	g__Kocuria	s__Kocuria_sp._CPCC_104605	0	0	0	0	0	0	7	0	0	0	0	0	0	0	0	0	0	0	0	0
k__Bacteria	p__Actinobacteria	c__Actinomycetia	o__Micrococcales	f__Micrococcaceae	g__Micrococcus	s__Micrococcus_luteus	0	0	0	0	0	0	0	0	0	0	0	0	0	0	0	0	0	0	0	0
k__Bacteria	p__Actinobacteria	c__Actinomycetia	o__Micrococcales	f__Micrococcaceae	g__Micrococcus	s__Micrococcus_sp._RIT608	0	9	0	0	0	0	0	0	0	0	0	0	0	0	0	0	0	0	0	0
k__Bacteria	p__Actinobacteria	c__Actinomycetia	o__Micrococcales	f__Micrococcaceae	g__Micrococcus	s__Micrococcus_terreus	0	0	0	0	0	0	0	0	0	0	0	0	0	0	0	0	0	0	0	0
k__Bacteria	p__Actinobacteria	c__Actinomycetia	o__Micrococcales	f__Micrococcaceae	g__Micrococcus	s__Unclassified	0	14	0	0	0	0	0	0	0	0	0	0	0	0	0	0	0	0	0	0
k__Bacteria	p__Actinobacteria	c__Actinomycetia	o__Micrococcales	f__Micrococcaceae	g__Nesterenkonia	s__Nesterenkonia_alba	0	0	0	0	0	0	0	0	0	6	0	0	0	0	0	0	0	0	0	0
k__Bacteria	p__Actinobacteria	c__Actinomycetia	o__Micrococcales	f__Micrococcaceae	g__Nesterenkonia	s__Nesterenkonia_muleiensis	0	0	0	6	0	0	0	0	0	0	0	0	0	0	0	0	0	0	0	0
k__Bacteria	p__Actinobacteria	c__Actinomycetia	o__Micrococcales	f__Micrococcaceae	g__Nesterenkonia	s__Nesterenkonia_natronophila	0	0	0	0	0	0	0	0	0	11	0	0	0	0	0	0	0	0	0	0
k__Bacteria	p__Actinobacteria	c__Actinomycetia	o__Micrococcales	f__Micrococcaceae	g__Pseudarthrobacter	s__Pseudarthrobacter_equi	0	6	0	0	0	0	0	0	0	0	0	0	0	0	0	0	0	0	0	0
k__Bacteria	p__Actinobacteria	c__Actinomycetia	o__Micrococcales	f__Micrococcaceae	g__Pseudarthrobacter	s__Pseudarthrobacter_sp._AG30	36	0	0	0	0	0	0	0	11	0	0	0	0	0	0	0	0	0	0	0
k__Bacteria	p__Actinobacteria	c__Actinomycetia	o__Micrococcales	f__Micrococcaceae	g__Pseudarthrobacter	s__Pseudarthrobacter_sulfonivorans	0	0	0	0	0	0	0	0	0	0	0	0	0	0	0	0	0	0	4	0
k__Bacteria	p__Actinobacteria	c__Actinomycetia	o__Micrococcales	f__Micrococcaceae	g__Pseudoglutamicibacter	s__Pseudoglutamicibacter_albus	0	0	0	8	0	0	0	0	0	0	0	0	0	0	0	0	0	0	0	0
k__Bacteria	p__Actinobacteria	c__Actinomycetia	o__Micrococcales	f__Micrococcaceae	g__Rothia	s__Rothia_aeria	649	192	18	152	0	6	25	0	41	80	0	0	0	0	0	0	0	0	0	0
k__Bacteria	p__Actinobacteria	c__Actinomycetia	o__Micrococcales	f__Micrococcaceae	g__Rothia	s__Rothia_dentocariosa	4327	663	68	322	0	59	87	0	116	328	0	0	0	0	0	0	0	0	0	0
k__Bacteria	p__Actinobacteria	c__Actinomycetia	o__Micrococcales	f__Micrococcaceae	g__Rothia	s__Rothia_mucilaginosa	110386	62237	6348	21385	0	3049	8568	4	10022	26306	0	0	0	0	0	0	0	0	0	0
k__Bacteria	p__Actinobacteria	c__Actinomycetia	o__Micrococcales	f__Micrococcaceae	g__Rothia	s__Rothia_sp._HMSC036D11	58	0	0	0	0	0	0	0	15	0	0	0	0	0	0	0	0	0	0	0
k__Bacteria	p__Actinobacteria	c__Actinomycetia	o__Micrococcales	f__Micrococcaceae	g__Rothia	s__Rothia_sp._HMSC058E10	13	30	0	0	0	0	0	0	0	0	0	0	0	0	0	0	0	0	0	0
k__Bacteria	p__Actinobacteria	c__Actinomycetia	o__Micrococcales	f__Micrococcaceae	g__Rothia	s__Rothia_sp._HMSC061C12	364	127	17	126	0	0	35	0	15	140	0	0	0	0	0	0	0	0	0	0
k__Bacteria	p__Actinobacteria	c__Actinomycetia	o__Micrococcales	f__Micrococcaceae	g__Rothia	s__Rothia_sp._HMSC061D12	499	355	38	133	0	18	38	0	54	182	0	0	0	0	0	0	0	0	0	0
k__Bacteria	p__Actinobacteria	c__Actinomycetia	o__Micrococcales	f__Micrococcaceae	g__Rothia	s__Rothia_sp._HMSC061E04	543	396	80	108	0	14	95	0	83	183	0	0	0	0	0	0	0	0	0	0
k__Bacteria	p__Actinobacteria	c__Actinomycetia	o__Micrococcales	f__Micrococcaceae	g__Rothia	s__Rothia_sp._HMSC062F03	95	1027	0	11	0	30	22	0	16	25	0	0	0	0	0	0	0	0	0	0
k__Bacteria	p__Actinobacteria	c__Actinomycetia	o__Micrococcales	f__Micrococcaceae	g__Rothia	s__Rothia_sp._HMSC062H08	287	200	13	133	0	3	73	2	37	138	0	0	0	0	0	0	0	0	0	0
k__Bacteria	p__Actinobacteria	c__Actinomycetia	o__Micrococcales	f__Micrococcaceae	g__Rothia	s__Rothia_sp._HMSC064D08	19	0	0	0	0	0	0	0	0	11	0	0	0	0	0	0	0	0	0	0
k__Bacteria	p__Actinobacteria	c__Actinomycetia	o__Micrococcales	f__Micrococcaceae	g__Rothia	s__Rothia_sp._HMSC064F07	1068	193	23	130	0	19	52	0	41	282	0	0	0	0	0	0	0	0	0	0
k__Bacteria	p__Actinobacteria	c__Actinomycetia	o__Micrococcales	f__Micrococcaceae	g__Rothia	s__Rothia_sp._HMSC065B04	656	181	25	76	0	3	50	0	68	185	0	0	0	0	0	0	0	0	0	0
k__Bacteria	p__Actinobacteria	c__Actinomycetia	o__Micrococcales	f__Micrococcaceae	g__Rothia	s__Rothia_sp._HMSC065C03	917	161	15	114	0	7	19	0	24	123	0	0	0	0	0	0	0	0	0	0
k__Bacteria	p__Actinobacteria	c__Actinomycetia	o__Micrococcales	f__Micrococcaceae	g__Rothia	s__Rothia_sp._HMSC065C12	1315	271	58	155	0	25	184	0	139	268	0	0	0	0	0	0	0	0	0	0
k__Bacteria	p__Actinobacteria	c__Actinomycetia	o__Micrococcales	f__Micrococcaceae	g__Rothia	s__Rothia_sp._HMSC065D02	7	84	0	0	0	0	0	0	0	0	0	0	0	0	0	0	0	0	0	0
k__Bacteria	p__Actinobacteria	c__Actinomycetia	o__Micrococcales	f__Micrococcaceae	g__Rothia	s__Rothia_sp._HMSC065D09	270	77	3	0	0	6	7	0	8	0	0	0	0	0	0	0	0	0	0	0
k__Bacteria	p__Actinobacteria	c__Actinomycetia	o__Micrococcales	f__Micrococcaceae	g__Rothia	s__Rothia_sp._HMSC065G12	25	0	0	5	0	0	0	0	0	0	0	0	0	0	0	0	0	0	0	0
k__Bacteria	p__Actinobacteria	c__Actinomycetia	o__Micrococcales	f__Micrococcaceae	g__Rothia	s__Rothia_sp._HMSC066G02	765	124	21	97	0	0	37	0	49	81	0	0	0	0	0	0	0	0	0	0
k__Bacteria	p__Actinobacteria	c__Actinomycetia	o__Micrococcales	f__Micrococcaceae	g__Rothia	s__Rothia_sp._HMSC066G07	585	563	23	46	0	18	36	0	44	90	0	0	0	0	0	0	0	0	0	0
k__Bacteria	p__Actinobacteria	c__Actinomycetia	o__Micrococcales	f__Micrococcaceae	g__Rothia	s__Rothia_sp._HMSC066H02	0	38	0	0	0	0	4	0	0	0	0	0	0	0	0	0	0	0	0	0
k__Bacteria	p__Actinobacteria	c__Actinomycetia	o__Micrococcales	f__Micrococcaceae	g__Rothia	s__Rothia_sp._HMSC067H10	23	0	0	0	0	0	0	0	0	0	0	0	0	0	0	0	0	0	0	0
k__Bacteria	p__Actinobacteria	c__Actinomycetia	o__Micrococcales	f__Micrococcaceae	g__Rothia	s__Rothia_sp._HMSC068E02	214	48	10	40	0	0	37	0	14	70	0	0	0	0	0	0	0	0	0	0
k__Bacteria	p__Actinobacteria	c__Actinomycetia	o__Micrococcales	f__Micrococcaceae	g__Rothia	s__Rothia_sp._HMSC068F09	65	804	4	33	0	11	28	0	13	63	0	0	0	0	0	0	0	0	0	0
k__Bacteria	p__Actinobacteria	c__Actinomycetia	o__Micrococcales	f__Micrococcaceae	g__Rothia	s__Rothia_sp._HMSC069C01	22	0	0	0	0	0	0	0	10	0	0	0	0	0	0	0	0	0	0	0
k__Bacteria	p__Actinobacteria	c__Actinomycetia	o__Micrococcales	f__Micrococcaceae	g__Rothia	s__Rothia_sp._HMSC069C03	175	152	12	78	0	27	26	5	132	150	0	0	0	0	0	0	0	0	0	0
k__Bacteria	p__Actinobacteria	c__Actinomycetia	o__Micrococcales	f__Micrococcaceae	g__Rothia	s__Rothia_sp._HMSC069C04	826	359	16	48	0	2	65	0	59	114	0	0	0	0	0	0	0	0	0	0
k__Bacteria	p__Actinobacteria	c__Actinomycetia	o__Micrococcales	f__Micrococcaceae	g__Rothia	s__Rothia_sp._HMSC069C10	1024	393	16	72	0	26	40	0	69	124	0	0	0	0	0	0	0	0	0	0
k__Bacteria	p__Actinobacteria	c__Actinomycetia	o__Micrococcales	f__Micrococcaceae	g__Rothia	s__Rothia_sp._HMSC069D01	242	218	74	36	0	7	23	0	32	84	0	0	0	0	0	0	0	0	0	0
k__Bacteria	p__Actinobacteria	c__Actinomycetia	o__Micrococcales	f__Micrococcaceae	g__Rothia	s__Rothia_sp._HMSC071B01	276	231	8	69	0	16	21	0	65	184	0	0	0	0	0	0	0	0	0	0
k__Bacteria	p__Actinobacteria	c__Actinomycetia	o__Micrococcales	f__Micrococcaceae	g__Rothia	s__Rothia_sp._HMSC071C12	1021	288	29	88	0	9	82	0	52	90	0	0	0	0	0	0	0	0	0	0
k__Bacteria	p__Actinobacteria	c__Actinomycetia	o__Micrococcales	f__Micrococcaceae	g__Rothia	s__Rothia_sp._HMSC071F11	15	2	0	0	0	0	0	0	0	0	0	0	0	0	0	0	0	0	0	0
k__Bacteria	p__Actinobacteria	c__Actinomycetia	o__Micrococcales	f__Micrococcaceae	g__Rothia	s__Rothia_sp._HMSC072B03	253	2031	0	29	0	2	23	0	57	58	0	0	0	0	0	0	0	0	0	0
k__Bacteria	p__Actinobacteria	c__Actinomycetia	o__Micrococcales	f__Micrococcaceae	g__Rothia	s__Rothia_sp._HMSC072B04	678	198	21	51	0	5	144	0	41	47	0	0	0	0	0	0	0	0	0	0
k__Bacteria	p__Actinobacteria	c__Actinomycetia	o__Micrococcales	f__Micrococcaceae	g__Rothia	s__Rothia_sp._HMSC072E10	331	1594	3	57	0	5	7	0	0	222	0	0	0	0	0	0	0	0	0	0
k__Bacteria	p__Actinobacteria	c__Actinomycetia	o__Micrococcales	f__Micrococcaceae	g__Rothia	s__Rothia_sp._HMSC073B08	518	360	23	128	0	216	132	0	79	194	0	0	0	0	0	0	0	0	0	0
k__Bacteria	p__Actinobacteria	c__Actinomycetia	o__Micrococcales	f__Micrococcaceae	g__Rothia	s__Rothia_sp._HMSC075F09	0	72	19	86	0	0	9	0	16	91	0	0	0	0	0	0	0	0	0	0
k__Bacteria	p__Actinobacteria	c__Actinomycetia	o__Micrococcales	f__Micrococcaceae	g__Rothia	s__Rothia_sp._HMSC076D04	407	199	27	59	0	3	41	0	39	94	0	0	0	0	0	0	0	0	0	0
k__Bacteria	p__Actinobacteria	c__Actinomycetia	o__Micrococcales	f__Micrococcaceae	g__Rothia	s__Rothia_sp._HMSC078H08	464	466	0	81	0	3	11	0	49	132	0	0	0	0	0	0	0	0	0	0
k__Bacteria	p__Actinobacteria	c__Actinomycetia	o__Micrococcales	f__Micrococcaceae	g__Rothia	s__Rothia_sp._HMSC08A08	22	0	0	0	0	0	0	0	33	0	0	0	0	0	0	0	0	0	0	0
k__Bacteria	p__Actinobacteria	c__Actinomycetia	o__Micrococcales	f__Micrococcaceae	g__Rothia	s__Rothia_sp._HSID18067	70	0	0	7	0	0	0	0	0	4	0	0	0	0	0	0	0	0	0	0
k__Bacteria	p__Actinobacteria	c__Actinomycetia	o__Micrococcales	f__Micrococcaceae	g__Rothia	s__Rothia_sp._HSID18069	130	0	6	7	0	0	0	0	7	11	0	0	0	0	0	0	0	0	0	0
k__Bacteria	p__Actinobacteria	c__Actinomycetia	o__Micrococcales	f__Micrococcaceae	g__Rothia	s__Rothia_sp._ND6WE1A	128	43	4	27	0	0	3	0	9	22	0	0	0	0	0	0	0	0	0	0
k__Bacteria	p__Actinobacteria	c__Actinomycetia	o__Micrococcales	f__Micrococcaceae	g__Rothia	s__Rothia_sp._Olga	60	3	0	3	0	0	0	0	0	0	0	0	0	0	0	0	0	0	0	0
k__Bacteria	p__Actinobacteria	c__Actinomycetia	o__Micrococcales	f__Micrococcaceae	g__Rothia	s__Rothia_sp._T40_1	62	0	0	17	0	0	0	0	0	0	0	0	0	0	0	0	0	0	0	0
k__Bacteria	p__Actinobacteria	c__Actinomycetia	o__Micrococcales	f__Micrococcaceae	g__Rothia	s__Unclassified	77944	45228	4946	13608	0	2567	7229	5	7193	17292	0	4	0	0	0	0	0	0	0	4
k__Bacteria	p__Actinobacteria	c__Actinomycetia	o__Micrococcales	f__Micrococcaceae	g__Unclassified	s__Unclassified	168	111	7	49	0	14	22	0	16	62	0	0	0	0	0	0	0	0	0	0
k__Bacteria	p__Actinobacteria	c__Actinomycetia	o__Micrococcales	f__Micrococcaceae	g__Zhihengliuella	s__Zhihengliuella_sp._ISTPL4	0	0	0	5	0	0	0	0	0	0	0	0	0	0	0	0	0	0	0	0
k__Bacteria	p__Actinobacteria	c__Actinomycetia	o__Micrococcales	f__Promicromonosporaceae	g__Antribacter	s__Antribacter_gilvus	0	0	0	0	0	0	0	0	0	5	0	0	0	0	0	0	0	0	0	0
k__Bacteria	p__Actinobacteria	c__Actinomycetia	o__Micrococcales	f__Promicromonosporaceae	g__Cellulosimicrobium	s__Cellulosimicrobium_cellulans	0	0	0	4	0	0	0	0	0	0	0	0	0	0	0	0	0	0	0	0
k__Bacteria	p__Actinobacteria	c__Actinomycetia	o__Micrococcales	f__Promicromonosporaceae	g__Isoptericola	s__Isoptericola_variabilis	225	703	5	204	0	0	41	0	0	210	0	0	0	0	0	0	0	0	0	0
k__Bacteria	p__Actinobacteria	c__Actinomycetia	o__Micrococcales	f__Promicromonosporaceae	g__Promicromonospora	s__Promicromonospora_sp._AC04	0	0	0	0	0	0	0	0	0	10	0	0	0	0	0	0	0	0	0	0
k__Bacteria	p__Actinobacteria	c__Actinomycetia	o__Micrococcales	f__Promicromonosporaceae	g__Xylanibacterium	s__Xylanibacterium_ulmi	0	24	0	0	0	0	0	0	0	0	0	0	0	0	0	0	0	0	0	0
k__Bacteria	p__Actinobacteria	c__Actinomycetia	o__Micrococcales	f__Promicromonosporaceae	g__Xylanimonas	s__Xylanimonas_allomyrinae	0	0	0	0	0	0	0	0	0	18	0	0	0	0	0	0	0	0	0	0
k__Bacteria	p__Actinobacteria	c__Actinomycetia	o__Micrococcales	f__Promicromonosporaceae	g__Xylanimonas	s__Xylanimonas_cellulosilytica	257	187	4	73	0	0	10	0	5	214	0	0	0	0	0	0	0	0	0	0
k__Bacteria	p__Actinobacteria	c__Actinomycetia	o__Micrococcales	f__Sanguibacteraceae	g__Sanguibacter	s__Sanguibacter_keddieii	466	694	25	820	0	0	45	0	0	4822	0	0	0	0	0	0	0	0	0	0
k__Bacteria	p__Actinobacteria	c__Actinomycetia	o__Micrococcales	f__Unclassified	g__Timonella	s__Timonella_senegalensis	0	0	0	0	0	3	0	0	0	0	0	0	0	0	0	0	0	0	0	0
k__Bacteria	p__Actinobacteria	c__Actinomycetia	o__Micrococcales	f__Unclassified	g__Unclassified	s__Micrococcales_bacterium	0	0	0	10	0	0	0	0	0	0	0	0	0	0	0	0	0	0	0	0
k__Bacteria	p__Actinobacteria	c__Actinomycetia	o__Micrococcales	f__Unclassified	g__Unclassified	s__Micrococcales_bacterium_72_143	0	0	0	0	0	0	0	0	0	3	0	0	0	0	0	0	0	0	0	0
k__Bacteria	p__Actinobacteria	c__Actinomycetia	o__Micrococcales	f__Unclassified	g__Unclassified	s__Unclassified	41	50	0	126	0	7	16	0	0	112	0	0	0	0	0	0	0	0	0	0
k__Bacteria	p__Actinobacteria	c__Actinomycetia	o__Micromonosporales	f__Micromonosporaceae	g__Actinoplanes	s__Actinoplanes_globisporus	0	0	0	0	0	0	0	0	0	0	0	0	0	0	0	0	0	0	0	3
k__Bacteria	p__Actinobacteria	c__Actinomycetia	o__Micromonosporales	f__Micromonosporaceae	g__Actinoplanes	s__Actinoplanes_philippinensis	3	0	0	0	0	0	0	0	0	0	0	0	0	0	0	0	0	0	0	0
k__Bacteria	p__Actinobacteria	c__Actinomycetia	o__Micromonosporales	f__Micromonosporaceae	g__Longispora	s__Longispora_albida	0	21	0	0	0	0	0	0	0	0	0	0	0	0	0	0	0	0	0	0
k__Bacteria	p__Actinobacteria	c__Actinomycetia	o__Micromonosporales	f__Micromonosporaceae	g__Micromonospora	s__Micromonospora_carbonacea	0	0	0	0	0	0	0	0	0	4	0	0	0	0	0	0	0	0	0	0
k__Bacteria	p__Actinobacteria	c__Actinomycetia	o__Micromonosporales	f__Micromonosporaceae	g__Micromonospora	s__Micromonospora_costi	0	0	0	0	0	0	0	0	0	9	0	0	0	0	0	0	0	0	0	0
k__Bacteria	p__Actinobacteria	c__Actinomycetia	o__Micromonosporales	f__Micromonosporaceae	g__Micromonospora	s__Micromonospora_noduli	0	0	0	14	0	0	0	0	0	0	0	0	0	0	0	0	0	0	0	0
k__Bacteria	p__Actinobacteria	c__Actinomycetia	o__Micromonosporales	f__Micromonosporaceae	g__Micromonospora	s__Micromonospora_radicis	0	20	0	0	0	0	0	0	0	0	0	0	0	0	0	0	0	0	0	0
k__Bacteria	p__Actinobacteria	c__Actinomycetia	o__Micromonosporales	f__Micromonosporaceae	g__Micromonospora	s__Micromonospora_sediminicola	0	0	0	0	0	0	0	0	0	4	0	0	0	0	0	0	0	0	0	0
k__Bacteria	p__Actinobacteria	c__Actinomycetia	o__Micromonosporales	f__Micromonosporaceae	g__Micromonospora	s__Micromonospora_sp._Llam0	0	0	0	0	0	0	6	0	0	0	0	7	0	0	0	0	0	0	7	0
k__Bacteria	p__Actinobacteria	c__Actinomycetia	o__Micromonosporales	f__Micromonosporaceae	g__Plantactinospora	s__Plantactinospora_sp._KBS50	0	7	0	0	0	0	0	0	0	0	0	0	0	0	0	0	0	0	0	0
k__Bacteria	p__Actinobacteria	c__Actinomycetia	o__Nakamurellales	f__Nakamurellaceae	g__Nakamurella	s__Nakamurella_multipartita	0	0	0	0	0	0	0	0	0	0	0	0	0	0	0	0	0	0	0	0
k__Bacteria	p__Actinobacteria	c__Actinomycetia	o__Propionibacteriales	f__Kribbellaceae	g__Kribbella	s__Kribbella_catacumbae	0	0	0	0	0	0	0	0	0	0	0	0	0	0	0	0	0	0	0	0
k__Bacteria	p__Actinobacteria	c__Actinomycetia	o__Propionibacteriales	f__Kribbellaceae	g__Kribbella	s__Kribbella_monticola	0	0	0	0	0	0	0	0	0	9	0	0	0	0	0	0	0	0	0	0
k__Bacteria	p__Actinobacteria	c__Actinomycetia	o__Propionibacteriales	f__Kribbellaceae	g__Kribbella	s__Kribbella_sp._ALI_6_A	0	0	0	0	0	0	0	0	0	7	0	0	0	0	0	0	0	0	0	0
k__Bacteria	p__Actinobacteria	c__Actinomycetia	o__Propionibacteriales	f__Nocardioidaceae	g__Aeromicrobium	s__Aeromicrobium_choanae	0	0	0	6	0	0	0	0	0	0	0	0	0	0	0	0	0	0	0	0
k__Bacteria	p__Actinobacteria	c__Actinomycetia	o__Propionibacteriales	f__Nocardioidaceae	g__Mumia	s__Mumia_flava	0	0	0	0	0	0	0	0	0	3	0	0	0	0	0	0	0	0	0	0
k__Bacteria	p__Actinobacteria	c__Actinomycetia	o__Propionibacteriales	f__Nocardioidaceae	g__Nocardioides	s__Nocardioides_alpinus	0	14	0	0	0	0	0	0	0	0	0	0	0	0	0	0	0	0	0	0
k__Bacteria	p__Actinobacteria	c__Actinomycetia	o__Propionibacteriales	f__Nocardioidaceae	g__Nocardioides	s__Nocardioides_iriomotensis	0	5	0	0	0	0	0	0	0	0	0	0	0	0	0	0	0	0	0	0
k__Bacteria	p__Actinobacteria	c__Actinomycetia	o__Propionibacteriales	f__Nocardioidaceae	g__Nocardioides	s__Nocardioides_lianchengensis	0	7	0	0	0	0	0	0	0	0	0	0	0	0	0	0	0	0	0	0
k__Bacteria	p__Actinobacteria	c__Actinomycetia	o__Propionibacteriales	f__Nocardioidaceae	g__Nocardioides	s__Nocardioides_silvaticus	0	0	0	0	0	3	0	36	24	16	0	4	0	0	0	0	17	0	0	0
k__Bacteria	p__Actinobacteria	c__Actinomycetia	o__Propionibacteriales	f__Nocardioidaceae	g__Nocardioides	s__Nocardioides_sp._CF167	0	5	0	0	0	0	0	0	0	0	0	0	0	0	0	0	0	0	0	0
k__Bacteria	p__Actinobacteria	c__Actinomycetia	o__Propionibacteriales	f__Nocardioidaceae	g__Nocardioides	s__Nocardioides_sp._CF204	0	0	0	0	0	0	0	0	0	8	0	0	0	0	0	0	0	0	0	0
k__Bacteria	p__Actinobacteria	c__Actinomycetia	o__Propionibacteriales	f__Nocardioidaceae	g__Nocardioides	s__Nocardioides_sp._YR527	0	0	0	3	0	0	0	0	0	0	0	0	0	0	0	0	0	0	0	0
k__Bacteria	p__Actinobacteria	c__Actinomycetia	o__Propionibacteriales	f__Nocardioidaceae	g__Nocardioides	s__Unclassified	0	0	0	0	0	0	0	0	0	0	0	0	0	0	0	0	0	0	0	0
k__Bacteria	p__Actinobacteria	c__Actinomycetia	o__Propionibacteriales	f__Nocardioidaceae	g__Pimelobacter	s__Pimelobacter_simplex	0	5	0	5	0	0	0	0	0	0	0	0	0	0	0	0	0	0	0	0
k__Bacteria	p__Actinobacteria	c__Actinomycetia	o__Propionibacteriales	f__Nocardioidaceae	g__Propionicimonas	s__Propionicimonas_paludicola	0	22	0	10	0	0	0	0	0	4	0	0	0	0	0	0	0	0	0	0
k__Bacteria	p__Actinobacteria	c__Actinomycetia	o__Propionibacteriales	f__Propionibacteriaceae	g__Acidipropionibacterium	s__Acidipropionibacterium_acidipropionici	0	0	0	0	0	0	0	0	0	0	0	0	0	0	0	0	0	0	0	0
k__Bacteria	p__Actinobacteria	c__Actinomycetia	o__Propionibacteriales	f__Propionibacteriaceae	g__Acidipropionibacterium	s__Acidipropionibacterium_jensenii	0	0	0	0	0	0	0	0	0	5	0	0	0	0	0	0	0	0	0	0
k__Bacteria	p__Actinobacteria	c__Actinomycetia	o__Propionibacteriales	f__Propionibacteriaceae	g__Acidipropionibacterium	s__Acidipropionibacterium_thoenii	0	0	0	0	0	0	0	0	0	3	0	0	0	0	0	0	0	0	0	0
k__Bacteria	p__Actinobacteria	c__Actinomycetia	o__Propionibacteriales	f__Propionibacteriaceae	g__Arachnia	s__Arachnia_propionica	7	0	0	9	0	0	0	0	7	0	0	0	0	0	0	0	0	0	0	0
k__Bacteria	p__Actinobacteria	c__Actinomycetia	o__Propionibacteriales	f__Propionibacteriaceae	g__Brevilactibacter	s__Brevilactibacter_flavus	0	0	0	3	0	0	0	0	0	0	0	0	0	0	0	0	0	0	0	0
k__Bacteria	p__Actinobacteria	c__Actinomycetia	o__Propionibacteriales	f__Propionibacteriaceae	g__Cutibacterium	s__Cutibacterium_acnes	5	77	0	17	0	0	0	0	0	7	1244	0	0	0	0	0	0	0	0	0
k__Bacteria	p__Actinobacteria	c__Actinomycetia	o__Propionibacteriales	f__Propionibacteriaceae	g__Cutibacterium	s__Cutibacterium_avidum	0	17	0	18	0	0	0	0	0	4	0	0	0	0	0	0	0	0	0	0
k__Bacteria	p__Actinobacteria	c__Actinomycetia	o__Propionibacteriales	f__Propionibacteriaceae	g__Cutibacterium	s__Cutibacterium_granulosum	8	0	0	4	0	0	11	0	0	29	0	0	0	0	0	0	0	0	0	0
k__Bacteria	p__Actinobacteria	c__Actinomycetia	o__Propionibacteriales	f__Propionibacteriaceae	g__Desertihabitans	s__Desertihabitans_brevis	0	25	0	0	0	0	0	0	0	0	0	0	0	0	0	0	0	0	0	0
k__Bacteria	p__Actinobacteria	c__Actinomycetia	o__Propionibacteriales	f__Propionibacteriaceae	g__Luteococcus	s__Luteococcus_japonicus	0	0	0	6	0	0	0	0	0	0	0	0	0	0	0	0	0	0	0	0
k__Bacteria	p__Actinobacteria	c__Actinomycetia	o__Propionibacteriales	f__Propionibacteriaceae	g__Microlunatus	s__Microlunatus_flavus	0	0	0	0	0	0	0	0	0	0	0	0	0	0	0	0	0	0	0	0
k__Bacteria	p__Actinobacteria	c__Actinomycetia	o__Propionibacteriales	f__Propionibacteriaceae	g__Nigerium	s__Nigerium_massiliense	0	19	0	0	0	0	0	0	0	0	0	0	0	0	0	0	0	0	0	0
k__Bacteria	p__Actinobacteria	c__Actinomycetia	o__Propionibacteriales	f__Propionibacteriaceae	g__Propionibacterium	s__Propionibacterium_australiense	0	0	0	0	0	0	0	0	0	3	0	0	0	0	0	0	0	0	0	0
k__Bacteria	p__Actinobacteria	c__Actinomycetia	o__Propionibacteriales	f__Propionibacteriaceae	g__Propionibacterium	s__Propionibacterium_freudenreichii	0	177	0	7	0	0	0	0	0	79	0	0	0	0	0	0	0	0	0	0
k__Bacteria	p__Actinobacteria	c__Actinomycetia	o__Propionibacteriales	f__Propionibacteriaceae	g__Propionibacterium	s__Propionibacterium_sp.	0	41	0	0	0	0	0	0	0	27	0	0	0	0	0	0	0	0	0	0
k__Bacteria	p__Actinobacteria	c__Actinomycetia	o__Propionibacteriales	f__Propionibacteriaceae	g__Propionibacterium	s__Propionibacterium_sp._DORA_15	12	47	0	17	0	0	0	0	14	0	0	0	0	0	0	0	0	0	0	0
k__Bacteria	p__Actinobacteria	c__Actinomycetia	o__Propionibacteriales	f__Propionibacteriaceae	g__Propionibacterium	s__Propionibacterium_sp._HGH0353	0	32	0	50	0	0	0	0	0	0	0	0	0	0	0	0	0	0	0	0
k__Bacteria	p__Actinobacteria	c__Actinomycetia	o__Propionibacteriales	f__Propionibacteriaceae	g__Propionibacterium	s__Propionibacterium_sp._KPL1844	0	0	0	0	0	0	0	0	0	6	0	0	0	0	0	0	0	0	0	0
k__Bacteria	p__Actinobacteria	c__Actinomycetia	o__Propionibacteriales	f__Propionibacteriaceae	g__Propionibacterium	s__Propionibacterium_sp._oral_taxon_192	5	0	0	0	0	0	0	0	0	0	0	0	0	0	0	0	0	0	0	0
k__Bacteria	p__Actinobacteria	c__Actinomycetia	o__Propionibacteriales	f__Propionibacteriaceae	g__Propionimicrobium	s__Propionimicrobium_lymphophilum	0	19	0	15	0	0	0	0	0	6	0	0	0	0	0	0	0	0	0	0
k__Bacteria	p__Actinobacteria	c__Actinomycetia	o__Propionibacteriales	f__Propionibacteriaceae	g__Propionimicrobium	s__Propionimicrobium_sp._Marseille_P3275	0	0	0	4	0	0	0	0	0	0	0	0	0	0	0	0	0	0	0	0
k__Bacteria	p__Actinobacteria	c__Actinomycetia	o__Propionibacteriales	f__Propionibacteriaceae	g__Tessaracoccus	s__Tessaracoccus_bendigoensis	0	0	4	0	0	0	0	0	0	0	0	0	0	0	0	0	0	0	0	0
k__Bacteria	p__Actinobacteria	c__Actinomycetia	o__Propionibacteriales	f__Propionibacteriaceae	g__Tessaracoccus	s__Tessaracoccus_sp._ZS01	0	0	0	0	0	0	0	0	0	0	0	0	0	0	0	0	0	0	0	0
k__Bacteria	p__Actinobacteria	c__Actinomycetia	o__Propionibacteriales	f__Propionibacteriaceae	g__Unclassified	s__Unclassified	0	222	0	39	0	0	0	0	0	24	0	0	0	0	0	0	0	0	0	0
k__Bacteria	p__Actinobacteria	c__Actinomycetia	o__Pseudonocardiales	f__Pseudonocardiaceae	g__Actinoalloteichus	s__Actinoalloteichus_hymeniacidonis	0	0	0	0	0	0	0	0	0	14	0	0	0	0	0	0	0	0	0	0
k__Bacteria	p__Actinobacteria	c__Actinomycetia	o__Pseudonocardiales	f__Pseudonocardiaceae	g__Actinokineospora	s__Actinokineospora_alba	0	0	0	0	0	4	0	0	0	0	0	0	0	0	0	0	0	0	0	0
k__Bacteria	p__Actinobacteria	c__Actinomycetia	o__Pseudonocardiales	f__Pseudonocardiaceae	g__Actinokineospora	s__Actinokineospora_enzanensis	0	0	0	3	0	0	0	0	0	0	0	0	0	0	0	0	0	0	0	0
k__Bacteria	p__Actinobacteria	c__Actinomycetia	o__Pseudonocardiales	f__Pseudonocardiaceae	g__Amycolatopsis	s__Amycolatopsis_kentuckyensis	0	3	0	0	0	0	0	0	0	0	0	0	0	0	0	0	0	0	0	0
k__Bacteria	p__Actinobacteria	c__Actinomycetia	o__Pseudonocardiales	f__Pseudonocardiaceae	g__Amycolatopsis	s__Amycolatopsis_mediterranei	0	0	0	0	0	0	0	0	0	0	0	0	0	0	0	0	28	0	0	0
k__Bacteria	p__Actinobacteria	c__Actinomycetia	o__Pseudonocardiales	f__Pseudonocardiaceae	g__Amycolatopsis	s__Amycolatopsis_sacchari	0	0	0	0	11	3	0	0	0	0	0	0	0	0	0	0	0	0	0	0
k__Bacteria	p__Actinobacteria	c__Actinomycetia	o__Pseudonocardiales	f__Pseudonocardiaceae	g__Amycolatopsis	s__Amycolatopsis_sp._WAC_04182	0	25	0	0	0	0	0	0	0	3	0	0	0	0	0	0	0	0	0	0
k__Bacteria	p__Actinobacteria	c__Actinomycetia	o__Pseudonocardiales	f__Pseudonocardiaceae	g__Pseudonocardia	s__Pseudonocardia_ammonioxydans	0	0	0	0	6	0	0	0	0	0	0	0	0	0	0	0	6	0	0	0
k__Bacteria	p__Actinobacteria	c__Actinomycetia	o__Pseudonocardiales	f__Pseudonocardiaceae	g__Pseudonocardia	s__Pseudonocardia_sediminis	0	10	0	4	0	0	0	0	0	0	0	0	0	0	0	0	0	0	0	0
k__Bacteria	p__Actinobacteria	c__Actinomycetia	o__Pseudonocardiales	f__Pseudonocardiaceae	g__Pseudonocardia	s__Pseudonocardia_sp._P2	0	0	0	0	0	0	0	0	12	0	0	0	0	0	0	0	0	0	0	0
k__Bacteria	p__Actinobacteria	c__Actinomycetia	o__Pseudonocardiales	f__Pseudonocardiaceae	g__Pseudonocardia	s__Pseudonocardia_thermophila	0	0	0	6	0	0	0	0	0	0	0	0	0	0	0	0	0	0	0	0
k__Bacteria	p__Actinobacteria	c__Actinomycetia	o__Pseudonocardiales	f__Pseudonocardiaceae	g__Saccharopolyspora	s__Saccharopolyspora_flava	0	0	0	0	0	0	0	0	0	6	0	0	0	0	0	0	0	0	0	0
k__Bacteria	p__Actinobacteria	c__Actinomycetia	o__Pseudonocardiales	f__Pseudonocardiaceae	g__Saccharopolyspora	s__Saccharopolyspora_spinosa	0	4	0	0	0	0	0	0	0	0	0	0	0	0	0	0	0	0	0	0
k__Bacteria	p__Actinobacteria	c__Actinomycetia	o__Pseudonocardiales	f__Pseudonocardiaceae	g__Saccharopolyspora	s__uncultured_Saccharopolyspora_sp.	0	0	0	0	0	0	0	41	10	0	0	0	0	0	0	0	0	0	0	0
k__Bacteria	p__Actinobacteria	c__Actinomycetia	o__Streptomycetales	f__Streptomycetaceae	g__Kitasatospora	s__Kitasatospora_sp._CB02891	0	0	0	0	0	0	0	0	5	0	0	0	0	0	0	0	0	0	0	0
k__Bacteria	p__Actinobacteria	c__Actinomycetia	o__Streptomycetales	f__Streptomycetaceae	g__Streptacidiphilus	s__Streptacidiphilus_melanogenes	0	0	0	0	0	0	0	0	0	0	0	0	0	0	0	7	0	0	0	0
k__Bacteria	p__Actinobacteria	c__Actinomycetia	o__Streptomycetales	f__Streptomycetaceae	g__Streptomyces	s__Streptomyces_albulus	0	0	0	0	0	0	0	0	0	0	0	0	0	0	0	0	0	0	5	0
k__Bacteria	p__Actinobacteria	c__Actinomycetia	o__Streptomycetales	f__Streptomycetaceae	g__Streptomyces	s__Streptomyces_antibioticus	0	0	0	0	0	0	0	5	0	0	0	0	0	0	0	0	0	0	0	0
k__Bacteria	p__Actinobacteria	c__Actinomycetia	o__Streptomycetales	f__Streptomycetaceae	g__Streptomyces	s__Streptomyces_aureocirculatus	0	0	0	0	0	0	3	0	0	0	0	0	0	0	0	0	0	0	0	0
k__Bacteria	p__Actinobacteria	c__Actinomycetia	o__Streptomycetales	f__Streptomycetaceae	g__Streptomyces	s__Streptomyces_barkulensis	0	0	0	0	0	0	3	0	0	0	0	0	0	0	0	0	0	0	0	0
k__Bacteria	p__Actinobacteria	c__Actinomycetia	o__Streptomycetales	f__Streptomycetaceae	g__Streptomyces	s__Streptomyces_cadmiisoli	5	0	0	0	0	0	0	0	0	0	0	0	0	0	0	0	0	0	0	0
k__Bacteria	p__Actinobacteria	c__Actinomycetia	o__Streptomycetales	f__Streptomycetaceae	g__Streptomyces	s__Streptomyces_canus	0	0	0	0	0	0	3	0	0	0	0	0	0	0	0	0	0	0	0	0
k__Bacteria	p__Actinobacteria	c__Actinomycetia	o__Streptomycetales	f__Streptomycetaceae	g__Streptomyces	s__Streptomyces_carpinensis	0	0	0	0	0	0	0	0	0	0	0	0	0	0	0	0	0	0	0	0
k__Bacteria	p__Actinobacteria	c__Actinomycetia	o__Streptomycetales	f__Streptomycetaceae	g__Streptomyces	s__Streptomyces_coelicoflavus	0	8	0	0	0	0	0	0	0	0	0	0	0	0	0	0	0	0	0	0
k__Bacteria	p__Actinobacteria	c__Actinomycetia	o__Streptomycetales	f__Streptomycetaceae	g__Streptomyces	s__Streptomyces_exfoliatus	0	0	0	0	0	0	0	0	0	3	0	0	0	0	0	0	0	0	0	0
k__Bacteria	p__Actinobacteria	c__Actinomycetia	o__Streptomycetales	f__Streptomycetaceae	g__Streptomyces	s__Streptomyces_griseocarneus	0	10	0	0	0	273	0	0	0	274	0	0	0	0	0	0	0	0	0	0
k__Bacteria	p__Actinobacteria	c__Actinomycetia	o__Streptomycetales	f__Streptomycetaceae	g__Streptomyces	s__Streptomyces_longwoodensis	5	0	0	0	0	0	0	0	0	0	0	0	0	0	0	0	0	0	0	0
k__Bacteria	p__Actinobacteria	c__Actinomycetia	o__Streptomycetales	f__Streptomycetaceae	g__Streptomyces	s__Streptomyces_neyagawaensis	6	0	0	0	0	0	0	0	0	0	0	0	0	0	0	0	0	0	0	0
k__Bacteria	p__Actinobacteria	c__Actinomycetia	o__Streptomycetales	f__Streptomycetaceae	g__Streptomyces	s__Streptomyces_niveus	0	0	0	0	0	3	0	0	0	0	0	0	0	0	0	0	0	0	0	0
k__Bacteria	p__Actinobacteria	c__Actinomycetia	o__Streptomycetales	f__Streptomycetaceae	g__Streptomyces	s__Streptomyces_qinglanensis	0	0	0	15	0	0	0	0	0	0	0	0	0	0	0	0	0	0	0	0
k__Bacteria	p__Actinobacteria	c__Actinomycetia	o__Streptomycetales	f__Streptomycetaceae	g__Streptomyces	s__Streptomyces_rubellomurinus	0	0	0	11	0	0	0	0	0	0	0	0	0	0	0	0	0	0	0	0
k__Bacteria	p__Actinobacteria	c__Actinomycetia	o__Streptomycetales	f__Streptomycetaceae	g__Streptomyces	s__Streptomyces_scabiei	8	0	0	0	0	0	0	0	0	0	0	0	0	0	0	0	0	0	0	0
k__Bacteria	p__Actinobacteria	c__Actinomycetia	o__Streptomycetales	f__Streptomycetaceae	g__Streptomyces	s__Streptomyces_sp._111WW2	0	0	0	0	0	5	0	0	0	0	0	0	0	0	0	0	4	0	0	0
k__Bacteria	p__Actinobacteria	c__Actinomycetia	o__Streptomycetales	f__Streptomycetaceae	g__Streptomyces	s__Streptomyces_sp._840.1	0	0	0	0	0	0	0	0	0	8	0	0	0	0	0	0	0	0	0	0
k__Bacteria	p__Actinobacteria	c__Actinomycetia	o__Streptomycetales	f__Streptomycetaceae	g__Streptomyces	s__Streptomyces_sp._ATexAB_D23	0	0	0	0	0	0	0	0	0	9	0	0	0	0	0	0	0	0	0	0
k__Bacteria	p__Actinobacteria	c__Actinomycetia	o__Streptomycetales	f__Streptomycetaceae	g__Streptomyces	s__Streptomyces_sp._Amel2xC10	0	4	0	4	0	0	0	0	0	87	0	0	0	0	0	0	0	0	0	0
k__Bacteria	p__Actinobacteria	c__Actinomycetia	o__Streptomycetales	f__Streptomycetaceae	g__Streptomyces	s__Streptomyces_sp._CNT318	0	0	0	0	0	0	0	0	0	3	0	0	0	0	0	0	0	0	0	0
k__Bacteria	p__Actinobacteria	c__Actinomycetia	o__Streptomycetales	f__Streptomycetaceae	g__Streptomyces	s__Streptomyces_sp._FxanaC1	0	0	0	41	0	0	0	0	0	0	0	0	0	0	0	0	0	0	0	0
k__Bacteria	p__Actinobacteria	c__Actinomycetia	o__Streptomycetales	f__Streptomycetaceae	g__Streptomyces	s__Streptomyces_sp._HCCB10043	0	0	0	0	0	0	0	0	0	10	0	0	0	0	0	0	0	0	0	0
k__Bacteria	p__Actinobacteria	c__Actinomycetia	o__Streptomycetales	f__Streptomycetaceae	g__Streptomyces	s__Streptomyces_sp._MH60	0	37	0	0	16	0	0	41	0	0	0	0	0	0	39	0	0	0	74	0
k__Bacteria	p__Actinobacteria	c__Actinomycetia	o__Streptomycetales	f__Streptomycetaceae	g__Streptomyces	s__Streptomyces_sp._MnatMP_M27	6	66	0	11	0	0	0	0	0	12	0	0	0	0	0	0	0	0	0	0
k__Bacteria	p__Actinobacteria	c__Actinomycetia	o__Streptomycetales	f__Streptomycetaceae	g__Streptomyces	s__Streptomyces_sp._NRRL_F_5135	0	0	0	0	0	0	0	0	0	6	0	0	0	0	0	0	0	0	0	0
k__Bacteria	p__Actinobacteria	c__Actinomycetia	o__Streptomycetales	f__Streptomycetaceae	g__Streptomyces	s__Streptomyces_sp._NRRL_F_5917	0	37	0	0	0	0	0	0	0	0	0	0	0	0	0	0	0	0	0	0
k__Bacteria	p__Actinobacteria	c__Actinomycetia	o__Streptomycetales	f__Streptomycetaceae	g__Streptomyces	s__Streptomyces_sp._NRRL_WC_3618	0	0	0	0	0	0	2	0	0	3	0	0	0	0	0	0	0	0	0	0
k__Bacteria	p__Actinobacteria	c__Actinomycetia	o__Streptomycetales	f__Streptomycetaceae	g__Streptomyces	s__Streptomyces_sp._P3	0	0	0	0	0	0	0	0	0	0	0	0	0	0	0	0	0	0	0	0
k__Bacteria	p__Actinobacteria	c__Actinomycetia	o__Streptomycetales	f__Streptomycetaceae	g__Streptomyces	s__Streptomyces_sp._PT12	0	0	0	0	0	0	0	0	0	0	0	0	0	0	0	11	0	0	5	0
k__Bacteria	p__Actinobacteria	c__Actinomycetia	o__Streptomycetales	f__Streptomycetaceae	g__Streptomyces	s__Streptomyces_sp._PsTaAH_137	0	0	76	0	0	0	0	0	0	2	0	0	0	0	0	0	0	0	0	0
k__Bacteria	p__Actinobacteria	c__Actinomycetia	o__Streptomycetales	f__Streptomycetaceae	g__Streptomyces	s__Streptomyces_sp._RP5T	0	3	0	0	0	0	0	0	0	0	0	0	0	0	0	0	0	0	0	0
k__Bacteria	p__Actinobacteria	c__Actinomycetia	o__Streptomycetales	f__Streptomycetaceae	g__Streptomyces	s__Streptomyces_sp._SMS_SU21	0	59	0	0	0	0	0	0	0	0	0	0	0	0	33	0	46	0	0	0
k__Bacteria	p__Actinobacteria	c__Actinomycetia	o__Streptomycetales	f__Streptomycetaceae	g__Streptomyces	s__Streptomyces_sp._TAA204	4	0	0	0	0	0	0	0	0	0	0	0	0	0	0	0	0	0	0	0
k__Bacteria	p__Actinobacteria	c__Actinomycetia	o__Streptomycetales	f__Streptomycetaceae	g__Streptomyces	s__Streptomyces_sp._WAC00263	0	0	0	0	0	0	0	0	0	0	0	0	0	0	0	0	17	0	0	0
k__Bacteria	p__Actinobacteria	c__Actinomycetia	o__Streptomycetales	f__Streptomycetaceae	g__Streptomyces	s__Streptomyces_sp._WAC06614	0	0	0	0	0	0	0	0	0	0	0	0	0	0	0	0	0	0	0	0
k__Bacteria	p__Actinobacteria	c__Actinomycetia	o__Streptomycetales	f__Streptomycetaceae	g__Streptomyces	s__Streptomyces_sp._WAC07061	0	3	0	0	0	0	0	0	0	0	0	0	0	0	0	0	0	0	0	0
k__Bacteria	p__Actinobacteria	c__Actinomycetia	o__Streptomycetales	f__Streptomycetaceae	g__Streptomyces	s__Streptomyces_sp._WAC_01325	0	0	0	3	0	0	0	0	0	0	0	0	0	0	0	0	0	0	0	0
k__Bacteria	p__Actinobacteria	c__Actinomycetia	o__Streptomycetales	f__Streptomycetaceae	g__Streptomyces	s__Unclassified	0	0	0	0	0	0	0	0	0	18	0	0	0	0	0	0	0	0	4	0
k__Bacteria	p__Actinobacteria	c__Actinomycetia	o__Streptosporangiales	f__Nocardiopsaceae	g__Nocardiopsis	s__Nocardiopsis_alkaliphila	0	32	0	0	0	0	0	0	0	0	0	0	0	0	0	0	0	0	0	0
k__Bacteria	p__Actinobacteria	c__Actinomycetia	o__Streptosporangiales	f__Nocardiopsaceae	g__Nocardiopsis	s__Nocardiopsis_sp._JB363	0	41	0	0	0	0	0	0	0	3	0	0	0	0	0	0	0	0	0	0
k__Bacteria	p__Actinobacteria	c__Actinomycetia	o__Streptosporangiales	f__Nocardiopsaceae	g__Nocardiopsis	s__Nocardiopsis_sp._TSRI0078	0	33	0	0	0	0	0	0	0	0	0	0	0	0	0	0	0	0	0	0
k__Bacteria	p__Actinobacteria	c__Actinomycetia	o__Streptosporangiales	f__Nocardiopsaceae	g__Nocardiopsis	s__Unclassified	0	3	0	0	0	0	0	0	0	5	0	0	0	0	0	0	0	0	0	0
k__Bacteria	p__Actinobacteria	c__Actinomycetia	o__Streptosporangiales	f__Nocardiopsaceae	g__Streptomonospora	s__Streptomonospora_alba	0	0	0	0	0	0	0	0	0	12	0	0	0	0	0	0	0	0	0	0
k__Bacteria	p__Actinobacteria	c__Actinomycetia	o__Streptosporangiales	f__Streptosporangiaceae	g__Bailinhaonella	s__Bailinhaonella_thermotolerans	0	0	0	0	0	0	5	0	0	5	0	0	0	0	0	0	0	0	0	0
k__Bacteria	p__Actinobacteria	c__Actinomycetia	o__Streptosporangiales	f__Streptosporangiaceae	g__Microbispora	s__Microbispora_rosea	19	0	0	0	0	0	0	0	0	0	0	0	0	0	0	0	0	0	0	0
k__Bacteria	p__Actinobacteria	c__Actinomycetia	o__Streptosporangiales	f__Streptosporangiaceae	g__Microbispora	s__Microbispora_sp._GMKU363	0	0	0	4	0	0	0	0	0	5	0	0	0	0	0	0	0	0	0	0
k__Bacteria	p__Actinobacteria	c__Actinomycetia	o__Streptosporangiales	f__Streptosporangiaceae	g__Nonomuraea	s__Nonomuraea_coxensis	0	0	0	7	0	0	0	0	0	0	0	0	0	0	0	0	0	0	0	0
k__Bacteria	p__Actinobacteria	c__Actinomycetia	o__Streptosporangiales	f__Streptosporangiaceae	g__Nonomuraea	s__Nonomuraea_polychroma	0	0	0	4	0	0	0	0	0	0	0	0	0	0	0	0	0	0	0	0
k__Bacteria	p__Actinobacteria	c__Actinomycetia	o__Streptosporangiales	f__Streptosporangiaceae	g__Sphaerisporangium	s__Sphaerisporangium_album	0	8	0	0	0	0	0	0	0	0	0	0	0	0	0	0	0	0	0	0
k__Bacteria	p__Actinobacteria	c__Actinomycetia	o__Streptosporangiales	f__Streptosporangiaceae	g__Spongiactinospora	s__Spongiactinospora_rosea	0	0	0	0	0	0	0	0	0	0	0	0	0	0	0	223	0	0	0	0
k__Bacteria	p__Actinobacteria	c__Actinomycetia	o__Streptosporangiales	f__Streptosporangiaceae	g__Thermobispora	s__Thermobispora_bispora	4	0	0	0	0	0	0	0	0	0	0	0	0	0	0	0	0	0	0	0
k__Bacteria	p__Actinobacteria	c__Actinomycetia	o__Streptosporangiales	f__Thermomonosporaceae	g__Actinomadura	s__Actinomadura_harenae	0	0	0	0	0	0	0	0	0	44	0	0	0	0	0	0	0	0	0	0
k__Bacteria	p__Actinobacteria	c__Actinomycetia	o__Streptosporangiales	f__Thermomonosporaceae	g__Actinomadura	s__Actinomadura_meyerae	7	0	0	0	0	0	0	0	0	0	0	0	0	0	0	0	0	0	0	0
k__Bacteria	p__Actinobacteria	c__Actinomycetia	o__Streptosporangiales	f__Thermomonosporaceae	g__Actinomadura	s__Actinomadura_pelletieri	0	0	0	10	0	0	0	0	0	0	0	0	0	0	0	0	0	0	0	0
k__Bacteria	p__Actinobacteria	c__Actinomycetia	o__Unclassified	f__Unclassified	g__Unclassified	s__Actinobacteria_bacterium_66_15	0	0	0	0	0	0	0	6	0	0	0	0	0	0	0	0	0	0	0	0
k__Bacteria	p__Actinobacteria	c__Actinomycetia	o__Unclassified	f__Unclassified	g__Unclassified	s__Actinobacteria_bacterium_OV450	3	0	0	0	0	0	0	0	0	0	0	0	0	0	0	0	0	0	0	0
k__Bacteria	p__Actinobacteria	c__Actinomycetia	o__Unclassified	f__Unclassified	g__Unclassified	s__Unclassified	7022	16278	452	7127	11	243	1052	90	573	8095	0	148	0	4	0	0	35	0	20	8
k__Bacteria	p__Actinobacteria	c__Coriobacteriia	o__Coriobacteriales	f__Atopobiaceae	g__Atopobium	s__Atopobium_deltae	2	25	0	7	0	0	0	0	5	3	0	0	0	0	0	0	0	0	0	0
k__Bacteria	p__Actinobacteria	c__Coriobacteriia	o__Coriobacteriales	f__Atopobiaceae	g__Atopobium	s__Atopobium_minutum	5	14	0	4	0	0	0	0	0	21	0	0	0	0	0	0	0	0	0	0
k__Bacteria	p__Actinobacteria	c__Coriobacteriia	o__Coriobacteriales	f__Atopobiaceae	g__Atopobium	s__Atopobium_sp._BS2	3	2446	0	239	0	5	0	0	0	453	0	0	0	0	0	0	0	0	0	0
k__Bacteria	p__Actinobacteria	c__Coriobacteriia	o__Coriobacteriales	f__Atopobiaceae	g__Atopobium	s__Atopobium_sp._BV3Ac4	4	0	0	0	0	0	0	0	4	0	0	0	0	0	0	0	0	0	0	0
k__Bacteria	p__Actinobacteria	c__Coriobacteriia	o__Coriobacteriales	f__Atopobiaceae	g__Atopobium	s__Atopobium_sp._HMSC064B08	0	30	0	3	0	0	0	0	0	7	0	0	0	0	0	0	0	0	0	0
k__Bacteria	p__Actinobacteria	c__Coriobacteriia	o__Coriobacteriales	f__Atopobiaceae	g__Atopobium	s__Atopobium_sp._ICM42b	24	1395	0	151	0	3	0	0	0	440	0	0	0	0	0	0	0	0	0	0
k__Bacteria	p__Actinobacteria	c__Coriobacteriia	o__Coriobacteriales	f__Atopobiaceae	g__Atopobium	s__Atopobium_sp._oral_taxon_199	96	99	0	118	0	0	0	0	0	42	0	0	0	0	0	0	0	0	0	0
k__Bacteria	p__Actinobacteria	c__Coriobacteriia	o__Coriobacteriales	f__Atopobiaceae	g__Atopobium	s__Atopobium_sp._oral_taxon_810	0	0	0	4	0	0	0	0	0	28	0	0	0	0	0	0	0	0	0	0
k__Bacteria	p__Actinobacteria	c__Coriobacteriia	o__Coriobacteriales	f__Atopobiaceae	g__Atopobium	s__Unclassified	1	767	0	68	0	0	3	0	0	260	0	0	0	0	0	0	0	0	0	0
k__Bacteria	p__Actinobacteria	c__Coriobacteriia	o__Coriobacteriales	f__Atopobiaceae	g__Lancefieldella	s__Lancefieldella_parvula	191	15399	0	2410	0	37	16	0	0	5728	0	0	0	0	0	0	0	0	0	0
k__Bacteria	p__Actinobacteria	c__Coriobacteriia	o__Coriobacteriales	f__Atopobiaceae	g__Lancefieldella	s__Lancefieldella_rimae	4	137	0	97	0	0	0	0	0	68	0	0	0	0	0	0	0	0	0	0
k__Bacteria	p__Actinobacteria	c__Coriobacteriia	o__Coriobacteriales	f__Atopobiaceae	g__Olsenella	s__Olsenella_phocaeensis	0	8	0	5	0	0	0	0	0	0	0	0	0	0	0	0	0	0	0	0
k__Bacteria	p__Actinobacteria	c__Coriobacteriia	o__Coriobacteriales	f__Atopobiaceae	g__Olsenella	s__Olsenella_profusa	0	4	0	0	0	0	0	0	0	0	0	0	0	0	0	0	0	0	0	0
k__Bacteria	p__Actinobacteria	c__Coriobacteriia	o__Coriobacteriales	f__Atopobiaceae	g__Olsenella	s__Olsenella_sp._AF21_51	0	3	0	0	0	0	0	0	0	0	0	0	0	0	0	0	0	0	0	0
k__Bacteria	p__Actinobacteria	c__Coriobacteriia	o__Coriobacteriales	f__Atopobiaceae	g__Olsenella	s__Olsenella_sp._AM30_3LB	0	81	0	0	0	0	0	0	0	3	0	0	0	0	0	0	0	0	0	0
k__Bacteria	p__Actinobacteria	c__Coriobacteriia	o__Coriobacteriales	f__Atopobiaceae	g__Olsenella	s__Olsenella_sp._An270	0	4	0	0	0	0	0	0	0	0	0	0	0	0	0	0	0	0	0	0
k__Bacteria	p__Actinobacteria	c__Coriobacteriia	o__Coriobacteriales	f__Atopobiaceae	g__Olsenella	s__Olsenella_sp._An293	11	43	0	0	0	0	0	0	0	5	0	0	0	0	0	0	0	0	0	0
k__Bacteria	p__Actinobacteria	c__Coriobacteriia	o__Coriobacteriales	f__Atopobiaceae	g__Olsenella	s__Olsenella_sp._DNF00959	3	33	0	0	0	0	0	0	0	0	0	0	0	0	0	0	0	0	0	0
k__Bacteria	p__Actinobacteria	c__Coriobacteriia	o__Coriobacteriales	f__Atopobiaceae	g__Olsenella	s__Olsenella_sp._GAM18	11	0	0	0	0	0	0	0	0	0	0	0	0	0	0	0	0	0	0	0
k__Bacteria	p__Actinobacteria	c__Coriobacteriia	o__Coriobacteriales	f__Atopobiaceae	g__Olsenella	s__Olsenella_sp._HMSC062G07	0	0	0	10	0	0	0	0	0	9	0	0	0	0	0	0	0	0	0	0
k__Bacteria	p__Actinobacteria	c__Coriobacteriia	o__Coriobacteriales	f__Atopobiaceae	g__Olsenella	s__Olsenella_sp._Marseille_P4559	7	8	4	142	0	0	0	0	3	20	0	0	0	0	0	0	0	0	0	0
k__Bacteria	p__Actinobacteria	c__Coriobacteriia	o__Coriobacteriales	f__Atopobiaceae	g__Olsenella	s__Olsenella_sp._kh2p3	0	9	0	0	0	0	0	0	0	0	0	0	0	0	0	0	0	0	0	0
k__Bacteria	p__Actinobacteria	c__Coriobacteriia	o__Coriobacteriales	f__Atopobiaceae	g__Olsenella	s__Olsenella_sp._oral_taxon_807	0	7	0	0	0	0	0	0	0	3	0	0	0	0	0	0	0	0	0	0
k__Bacteria	p__Actinobacteria	c__Coriobacteriia	o__Coriobacteriales	f__Atopobiaceae	g__Olsenella	s__Olsenella_sp._oral_taxon_809	0	0	0	0	0	0	0	0	0	13	0	0	0	0	0	0	0	0	0	0
k__Bacteria	p__Actinobacteria	c__Coriobacteriia	o__Coriobacteriales	f__Atopobiaceae	g__Olsenella	s__Olsenella_timonensis	0	11	0	0	0	0	0	0	0	4	0	0	0	0	0	0	0	0	0	0
k__Bacteria	p__Actinobacteria	c__Coriobacteriia	o__Coriobacteriales	f__Atopobiaceae	g__Olsenella	s__Olsenella_uli	0	7	0	3	0	0	0	0	0	13	0	0	0	0	0	0	0	0	0	0
k__Bacteria	p__Actinobacteria	c__Coriobacteriia	o__Coriobacteriales	f__Atopobiaceae	g__Olsenella	s__Unclassified	0	0	0	6	0	0	0	0	0	3	0	0	0	0	0	0	0	0	0	0
k__Bacteria	p__Actinobacteria	c__Coriobacteriia	o__Coriobacteriales	f__Atopobiaceae	g__Parafannyhessea	s__Parafannyhessea_umbonata	0	0	0	0	0	0	0	0	0	0	0	0	0	0	0	0	0	0	0	0
k__Bacteria	p__Actinobacteria	c__Coriobacteriia	o__Coriobacteriales	f__Atopobiaceae	g__Paratractidigestivibacter	s__Paratractidigestivibacter_faecalis	0	4	0	0	0	0	0	0	0	0	0	0	0	0	0	0	0	0	0	0
k__Bacteria	p__Actinobacteria	c__Coriobacteriia	o__Coriobacteriales	f__Atopobiaceae	g__Parolsenella	s__Parolsenella_massiliensis	0	4	0	0	0	0	12	0	0	69	0	0	0	0	0	0	0	0	0	0
k__Bacteria	p__Actinobacteria	c__Coriobacteriia	o__Coriobacteriales	f__Atopobiaceae	g__Unclassified	s__Unclassified	29	963	0	216	0	3	0	0	0	503	0	0	0	0	0	0	0	0	0	0
k__Bacteria	p__Actinobacteria	c__Coriobacteriia	o__Coriobacteriales	f__Coriobacteriaceae	g__Collinsella	s__Collinsella_aerofaciens	0	63	0	13	0	0	0	0	0	0	0	0	0	0	0	0	0	0	0	0
k__Bacteria	p__Actinobacteria	c__Coriobacteriia	o__Coriobacteriales	f__Coriobacteriaceae	g__Collinsella	s__Collinsella_intestinalis	0	11	0	0	0	0	0	0	0	0	0	0	0	0	0	0	0	0	0	0
k__Bacteria	p__Actinobacteria	c__Coriobacteriia	o__Coriobacteriales	f__Coriobacteriaceae	g__Collinsella	s__Collinsella_phocaeensis	0	8	0	0	0	0	0	0	0	21	0	0	0	0	0	0	0	0	0	0
k__Bacteria	p__Actinobacteria	c__Coriobacteriia	o__Coriobacteriales	f__Coriobacteriaceae	g__Collinsella	s__Collinsella_sp._AF15_51	0	20	0	29	0	0	0	0	0	0	0	0	0	0	0	0	0	0	0	0
k__Bacteria	p__Actinobacteria	c__Coriobacteriia	o__Coriobacteriales	f__Coriobacteriaceae	g__Collinsella	s__Collinsella_sp._AF16_8	0	13	0	0	0	0	0	0	0	13	0	0	0	0	0	0	0	0	0	0
k__Bacteria	p__Actinobacteria	c__Coriobacteriia	o__Coriobacteriales	f__Coriobacteriaceae	g__Collinsella	s__Collinsella_sp._AF38_3AC	0	13	0	6	0	0	0	0	0	3	0	0	0	0	0	0	0	0	0	0
k__Bacteria	p__Actinobacteria	c__Coriobacteriia	o__Coriobacteriales	f__Coriobacteriaceae	g__Collinsella	s__Collinsella_sp._AM13_34	0	24	0	3	0	3	0	0	0	0	0	0	0	0	0	0	0	0	0	0
k__Bacteria	p__Actinobacteria	c__Coriobacteriia	o__Coriobacteriales	f__Coriobacteriaceae	g__Collinsella	s__Collinsella_sp._AM43_1	0	0	0	0	0	0	0	0	0	6	0	0	0	0	0	0	0	0	0	0
k__Bacteria	p__Actinobacteria	c__Coriobacteriia	o__Coriobacteriales	f__Coriobacteriaceae	g__Collinsella	s__Collinsella_sp._An2	0	0	0	8	0	0	0	0	0	7	0	0	0	0	0	0	0	0	0	0
k__Bacteria	p__Actinobacteria	c__Coriobacteriia	o__Coriobacteriales	f__Coriobacteriaceae	g__Collinsella	s__Collinsella_sp._An268	0	0	0	0	0	0	0	0	0	41	0	0	0	0	0	0	0	0	0	0
k__Bacteria	p__Actinobacteria	c__Coriobacteriia	o__Coriobacteriales	f__Coriobacteriaceae	g__Collinsella	s__Collinsella_sp._An271	0	23	0	0	0	0	0	0	0	0	0	0	0	0	0	0	0	0	0	0
k__Bacteria	p__Actinobacteria	c__Coriobacteriia	o__Coriobacteriales	f__Coriobacteriaceae	g__Collinsella	s__Collinsella_sp._An307	4	0	0	7	0	0	0	0	0	0	0	0	0	0	0	0	0	0	0	0
k__Bacteria	p__Actinobacteria	c__Coriobacteriia	o__Coriobacteriales	f__Coriobacteriaceae	g__Collinsella	s__Collinsella_sp._An7	0	8	0	0	0	0	0	0	0	0	0	0	0	0	0	0	0	0	0	0
k__Bacteria	p__Actinobacteria	c__Coriobacteriia	o__Coriobacteriales	f__Coriobacteriaceae	g__Collinsella	s__Collinsella_sp._CAG_398	2	0	0	0	0	0	0	0	0	29	0	0	0	0	0	0	0	0	0	0
k__Bacteria	p__Actinobacteria	c__Coriobacteriia	o__Coriobacteriales	f__Coriobacteriaceae	g__Collinsella	s__Collinsella_sp._TM05_38	0	0	0	0	0	0	0	0	0	7	0	0	0	0	0	0	0	0	0	0
k__Bacteria	p__Actinobacteria	c__Coriobacteriia	o__Coriobacteriales	f__Coriobacteriaceae	g__Collinsella	s__Collinsella_tanakaei	0	1085	0	23	0	0	2	0	0	0	0	0	0	0	0	0	0	0	0	0
k__Bacteria	p__Actinobacteria	c__Coriobacteriia	o__Coriobacteriales	f__Coriobacteriaceae	g__Collinsella	s__Collinsella_vaginalis	0	0	0	0	0	0	0	0	0	4	0	0	0	0	0	0	0	0	0	0
k__Bacteria	p__Actinobacteria	c__Coriobacteriia	o__Coriobacteriales	f__Coriobacteriaceae	g__Collinsella	s__Unclassified	0	40	0	28	0	0	0	0	0	6	0	0	0	0	0	0	0	0	0	0
k__Bacteria	p__Actinobacteria	c__Coriobacteriia	o__Coriobacteriales	f__Coriobacteriaceae	g__Collinsella	s__uncultured_Collinsella_sp.	0	12	0	0	0	0	0	0	0	0	0	0	0	0	0	0	0	0	0	0
k__Bacteria	p__Actinobacteria	c__Coriobacteriia	o__Coriobacteriales	f__Coriobacteriaceae	g__Coriobacterium	s__Coriobacterium_glomerans	0	3	0	0	0	0	0	0	0	0	0	0	0	0	0	0	0	0	0	0
k__Bacteria	p__Actinobacteria	c__Coriobacteriia	o__Coriobacteriales	f__Coriobacteriaceae	g__Enorma	s__Enorma_massiliensis	0	0	0	0	0	0	0	0	0	28	0	0	0	0	0	0	0	0	0	0
k__Bacteria	p__Actinobacteria	c__Coriobacteriia	o__Coriobacteriales	f__Coriobacteriaceae	g__Enorma	s__Enorma_phocaeensis	0	0	0	0	0	0	0	0	0	0	0	0	0	0	0	0	0	0	0	0
k__Bacteria	p__Actinobacteria	c__Coriobacteriia	o__Coriobacteriales	f__Coriobacteriaceae	g__Parvibacter	s__Parvibacter_caecicola	0	0	0	0	0	0	0	0	0	0	0	0	0	0	0	0	0	0	0	0
k__Bacteria	p__Actinobacteria	c__Coriobacteriia	o__Coriobacteriales	f__Coriobacteriaceae	g__Senegalimassilia	s__Senegalimassilia_faecalis	0	0	0	20	0	0	0	0	0	0	0	0	0	0	0	0	0	0	0	0
k__Bacteria	p__Actinobacteria	c__Coriobacteriia	o__Coriobacteriales	f__Coriobacteriaceae	g__Unclassified	s__Coriobacteriaceae_bacterium	0	11	0	0	0	0	0	0	0	0	0	0	0	0	0	0	0	0	0	0
k__Bacteria	p__Actinobacteria	c__Coriobacteriia	o__Coriobacteriales	f__Coriobacteriaceae	g__Unclassified	s__Coriobacteriaceae_bacterium_BV3Ac1	0	12	0	0	0	0	0	0	0	24	0	0	0	0	0	0	0	0	0	0
k__Bacteria	p__Actinobacteria	c__Coriobacteriia	o__Coriobacteriales	f__Coriobacteriaceae	g__Unclassified	s__Coriobacteriaceae_bacterium_CHKCI002	0	9	0	0	0	0	0	0	0	0	0	0	0	0	0	0	0	0	0	0
k__Bacteria	p__Actinobacteria	c__Coriobacteriia	o__Coriobacteriales	f__Coriobacteriaceae	g__Unclassified	s__Coriobacteriaceae_bacterium_EMTCatB1	8	0	0	0	0	0	0	0	0	0	0	0	0	0	0	0	0	0	0	0
k__Bacteria	p__Actinobacteria	c__Coriobacteriia	o__Coriobacteriales	f__Unclassified	g__Unclassified	s__Coriobacteriales_bacterium_DNF00809	7	13	0	9	0	0	0	0	0	10	0	0	0	0	0	0	0	0	0	0
k__Bacteria	p__Actinobacteria	c__Coriobacteriia	o__Coriobacteriales	f__Unclassified	g__Unclassified	s__Coriobacteriales_bacterium_OH1046	0	35	0	3	0	0	0	0	0	0	0	0	0	0	0	0	0	0	0	0
k__Bacteria	p__Actinobacteria	c__Coriobacteriia	o__Coriobacteriales	f__Unclassified	g__Unclassified	s__Unclassified	0	17	0	0	0	0	0	0	0	0	0	0	0	0	0	0	0	0	0	0
k__Bacteria	p__Actinobacteria	c__Coriobacteriia	o__Eggerthellales	f__Eggerthellaceae	g__Adlercreutzia	s__Adlercreutzia_caecimuris	6	3	0	10	0	0	0	0	0	0	0	0	0	0	0	0	0	0	0	0
k__Bacteria	p__Actinobacteria	c__Coriobacteriia	o__Eggerthellales	f__Eggerthellaceae	g__Adlercreutzia	s__Adlercreutzia_equolifaciens	0	31	0	0	0	0	0	0	0	0	0	0	0	0	0	0	0	0	0	0
k__Bacteria	p__Actinobacteria	c__Coriobacteriia	o__Eggerthellales	f__Eggerthellaceae	g__Adlercreutzia	s__Adlercreutzia_mucosicola	0	0	0	0	0	0	0	0	0	0	0	0	0	0	0	0	0	0	0	0
k__Bacteria	p__Actinobacteria	c__Coriobacteriia	o__Eggerthellales	f__Eggerthellaceae	g__Adlercreutzia	s__Adlercreutzia_sp._Marseille_P7992	0	7	0	0	0	0	0	0	0	0	0	0	0	0	0	0	0	0	0	0
k__Bacteria	p__Actinobacteria	c__Coriobacteriia	o__Eggerthellales	f__Eggerthellaceae	g__Arabia	s__Arabia_massiliensis	0	9	0	0	0	0	0	0	0	0	0	0	0	0	0	0	0	0	0	0
k__Bacteria	p__Actinobacteria	c__Coriobacteriia	o__Eggerthellales	f__Eggerthellaceae	g__Berryella	s__Berryella_intestinalis	0	14	0	0	0	0	0	0	0	0	0	0	0	0	0	0	0	0	0	0
k__Bacteria	p__Actinobacteria	c__Coriobacteriia	o__Eggerthellales	f__Eggerthellaceae	g__Cryptobacterium	s__Cryptobacterium_curtum	9	29	0	5	0	0	0	0	0	6	0	0	0	0	0	0	0	0	0	0
k__Bacteria	p__Actinobacteria	c__Coriobacteriia	o__Eggerthellales	f__Eggerthellaceae	g__Denitrobacterium	s__Denitrobacterium_detoxificans	0	10	0	4	0	0	0	0	0	0	0	0	0	0	0	0	0	0	0	0
k__Bacteria	p__Actinobacteria	c__Coriobacteriia	o__Eggerthellales	f__Eggerthellaceae	g__Eggerthella	s__Eggerthella_lenta	0	138	0	0	0	0	0	0	0	15	0	0	0	0	0	0	0	0	0	0
k__Bacteria	p__Actinobacteria	c__Coriobacteriia	o__Eggerthellales	f__Eggerthellaceae	g__Eggerthella	s__Eggerthella_sp._1_3_56FAA	0	4	0	0	0	0	0	0	0	0	0	0	0	0	0	0	0	0	0	0
k__Bacteria	p__Actinobacteria	c__Coriobacteriia	o__Eggerthellales	f__Eggerthellaceae	g__Eggerthella	s__Eggerthella_sp._51_9	0	70	0	0	0	0	0	0	0	0	0	0	0	0	0	0	0	0	0	0
k__Bacteria	p__Actinobacteria	c__Coriobacteriia	o__Eggerthellales	f__Eggerthellaceae	g__Eggerthella	s__Eggerthella_sp._AM16_19	0	71	0	0	0	0	0	0	0	0	0	0	0	0	0	0	0	0	0	0
k__Bacteria	p__Actinobacteria	c__Coriobacteriia	o__Eggerthellales	f__Eggerthellaceae	g__Eggerthella	s__Eggerthella_sp._CAG_1427	14	0	0	0	0	0	0	0	0	0	0	0	0	0	0	0	0	0	0	0
k__Bacteria	p__Actinobacteria	c__Coriobacteriia	o__Eggerthellales	f__Eggerthellaceae	g__Eggerthella	s__Eggerthella_sp._CAG_298	10	0	0	0	0	0	0	0	7	0	0	0	0	0	0	0	0	0	0	0
k__Bacteria	p__Actinobacteria	c__Coriobacteriia	o__Eggerthellales	f__Eggerthellaceae	g__Eggerthella	s__Eggerthella_sp._CAG_368	0	8	0	0	0	0	0	0	0	0	0	0	0	0	0	0	0	0	0	0
k__Bacteria	p__Actinobacteria	c__Coriobacteriia	o__Eggerthellales	f__Eggerthellaceae	g__Enteroscipio	s__Enteroscipio_rubneri	0	6	0	0	0	0	0	0	0	0	0	0	0	0	0	0	0	0	0	0
k__Bacteria	p__Actinobacteria	c__Coriobacteriia	o__Eggerthellales	f__Eggerthellaceae	g__Gordonibacter	s__Gordonibacter_massiliensis	0	3	0	0	0	0	0	0	0	0	0	0	0	0	0	0	0	0	0	0
k__Bacteria	p__Actinobacteria	c__Coriobacteriia	o__Eggerthellales	f__Eggerthellaceae	g__Gordonibacter	s__Gordonibacter_pamelaeae	0	99	0	0	0	0	0	0	0	0	0	0	0	0	0	0	0	0	0	0
k__Bacteria	p__Actinobacteria	c__Coriobacteriia	o__Eggerthellales	f__Eggerthellaceae	g__Gordonibacter	s__Gordonibacter_sp._28C	14	0	0	0	0	0	0	0	0	0	0	0	0	0	0	0	0	0	0	0
k__Bacteria	p__Actinobacteria	c__Coriobacteriia	o__Eggerthellales	f__Eggerthellaceae	g__Gordonibacter	s__Gordonibacter_sp._An230	0	0	0	0	0	0	0	0	0	5	0	0	0	0	0	0	0	0	0	0
k__Bacteria	p__Actinobacteria	c__Coriobacteriia	o__Eggerthellales	f__Eggerthellaceae	g__Gordonibacter	s__Gordonibacter_sp._Marseille_P4307	5	21	0	5	0	0	0	0	0	5	0	0	0	0	0	0	0	0	0	0
k__Bacteria	p__Actinobacteria	c__Coriobacteriia	o__Eggerthellales	f__Eggerthellaceae	g__Gordonibacter	s__Gordonibacter_urolithinfaciens	0	7	0	0	0	0	0	0	0	0	0	0	0	0	0	0	0	0	0	0
k__Bacteria	p__Actinobacteria	c__Coriobacteriia	o__Eggerthellales	f__Eggerthellaceae	g__Paraeggerthella	s__Paraeggerthella_hongkongensis	0	85	0	0	0	0	0	0	0	0	0	0	0	0	0	0	0	0	0	0
k__Bacteria	p__Actinobacteria	c__Coriobacteriia	o__Eggerthellales	f__Eggerthellaceae	g__Phoenicibacter	s__Phoenicibacter_congonensis	0	7	0	69	0	0	0	0	0	8	0	0	0	0	0	0	0	0	0	0
k__Bacteria	p__Actinobacteria	c__Coriobacteriia	o__Eggerthellales	f__Eggerthellaceae	g__Raoultibacter	s__Raoultibacter_massiliensis	0	0	0	0	0	0	0	0	0	8	0	0	0	0	0	0	0	0	0	0
k__Bacteria	p__Actinobacteria	c__Coriobacteriia	o__Eggerthellales	f__Eggerthellaceae	g__Raoultibacter	s__Raoultibacter_timonensis	0	5	0	0	0	0	0	0	0	0	0	0	0	0	0	0	0	0	0	0
k__Bacteria	p__Actinobacteria	c__Coriobacteriia	o__Eggerthellales	f__Eggerthellaceae	g__Slackia	s__Slackia_exigua	0	19	0	0	0	0	0	0	0	354	0	0	0	0	0	0	0	0	0	0
k__Bacteria	p__Actinobacteria	c__Coriobacteriia	o__Eggerthellales	f__Eggerthellaceae	g__Slackia	s__Slackia_heliotrinireducens	0	24	0	6	0	0	0	0	0	5	0	0	0	0	0	0	0	0	0	0
k__Bacteria	p__Actinobacteria	c__Coriobacteriia	o__Eggerthellales	f__Eggerthellaceae	g__Slackia	s__Slackia_isoflavoniconvertens	0	71	0	0	0	0	0	0	0	35	0	0	0	0	0	0	0	0	0	0
k__Bacteria	p__Actinobacteria	c__Coriobacteriia	o__Eggerthellales	f__Eggerthellaceae	g__Slackia	s__Slackia_piriformis	0	0	0	0	0	0	0	0	0	0	0	0	0	0	0	0	0	0	0	0
k__Bacteria	p__Actinobacteria	c__Coriobacteriia	o__Eggerthellales	f__Eggerthellaceae	g__Unclassified	s__Eggerthellaceae_bacterium_AT8	6	6	0	0	0	0	0	0	0	0	0	0	0	0	0	0	0	0	0	0
k__Bacteria	p__Actinobacteria	c__Coriobacteriia	o__Eggerthellales	f__Eggerthellaceae	g__Unclassified	s__Unclassified	0	29	0	0	0	0	0	0	0	0	0	0	0	0	0	0	0	0	0	0
k__Bacteria	p__Actinobacteria	c__Coriobacteriia	o__Unclassified	f__Unclassified	g__Unclassified	s__Coriobacteriia_bacterium	0	25	0	0	0	0	0	0	0	48	0	0	0	0	0	0	0	0	0	0
k__Bacteria	p__Actinobacteria	c__Coriobacteriia	o__Unclassified	f__Unclassified	g__Unclassified	s__Unclassified	0	40	0	58	0	0	0	0	0	45	0	0	0	0	0	0	0	0	0	0
k__Bacteria	p__Actinobacteria	c__Rubrobacteria	o__Rubrobacterales	f__Rubrobacteraceae	g__Rubrobacter	s__Rubrobacter_aplysinae	0	4	0	0	0	0	0	0	0	0	0	0	0	0	0	0	0	0	0	0
k__Bacteria	p__Actinobacteria	c__Thermoleophilia	o__Solirubrobacterales	f__Conexibacteraceae	g__Conexibacter	s__Conexibacter_woesei	0	7	11	10	0	0	6	16	7	11	0	23	0	11	6	11	19	9	11	0
k__Bacteria	p__Actinobacteria	c__Thermoleophilia	o__Solirubrobacterales	f__Patulibacteraceae	g__Patulibacter	s__Patulibacter_americanus	0	0	0	0	0	0	0	0	0	10	0	0	0	0	0	0	0	0	0	0
k__Bacteria	p__Actinobacteria	c__Thermoleophilia	o__Solirubrobacterales	f__Solirubrobacteraceae	g__Solirubrobacter	s__Solirubrobacter_sp._URHD0082	0	0	0	0	3	0	0	0	0	0	0	0	0	0	0	0	0	0	0	0
k__Bacteria	p__Actinobacteria	c__Unclassified	o__Unclassified	f__Unclassified	g__Unclassified	s__Actinobacteria_bacterium_13_2_20CM_2_71_6	0	0	0	0	0	0	0	0	0	0	0	0	0	0	0	0	0	0	0	0
k__Bacteria	p__Actinobacteria	c__Unclassified	o__Unclassified	f__Unclassified	g__Unclassified	s__Actinobacteria_bacterium_21_64_8	0	3	0	0	0	0	0	0	0	0	0	0	0	0	0	0	0	0	0	0
k__Bacteria	p__Actinobacteria	c__Unclassified	o__Unclassified	f__Unclassified	g__Unclassified	s__Actinobacteria_bacterium_HGW_Actinobacteria_8	0	3	0	0	0	0	0	0	0	5	0	0	0	0	0	0	0	0	0	0
k__Bacteria	p__Actinobacteria	c__Unclassified	o__Unclassified	f__Unclassified	g__Unclassified	s__Actinobacteria_bacterium_RBG_19FT_COMBO_36_27	0	0	0	8	0	0	0	0	0	0	0	0	0	0	0	0	0	0	0	0
k__Bacteria	p__Actinobacteria	c__Unclassified	o__Unclassified	f__Unclassified	g__Unclassified	s__Unclassified	39	224	0	32	0	0	0	0	0	5	0	0	0	0	0	0	0	0	0	0
k__Bacteria	p__Aquificae	c__Aquificae	o__Aquificales	f__Aquificaceae	g__Aquifex	s__Aquifex_sp.	0	20	5	4	25	6	0	3	27	64	0	5	0	0	0	35	45	0	34	0
k__Bacteria	p__Aquificae	c__Aquificae	o__Aquificales	f__Aquificaceae	g__Hydrogenobacter	s__Hydrogenobacter_hydrogenophilus	0	24	0	0	0	0	0	0	0	0	0	0	0	0	0	0	0	0	0	0
k__Bacteria	p__Aquificae	c__Aquificae	o__Aquificales	f__Aquificaceae	g__Hydrogenobaculum	s__Unclassified	0	0	0	7	0	0	0	0	0	0	0	0	0	0	0	0	0	0	0	0
k__Bacteria	p__Aquificae	c__Aquificae	o__Aquificales	f__Hydrogenothermaceae	g__Hydrogenothermus	s__Hydrogenothermus_marinus	0	5	0	0	0	0	0	0	0	0	0	0	0	0	0	0	0	0	0	0
k__Bacteria	p__Aquificae	c__Aquificae	o__Aquificales	f__Hydrogenothermaceae	g__Hydrogenothermus	s__Hydrogenothermus_sp.	0	0	0	0	0	0	0	0	0	0	0	0	0	0	0	0	0	0	0	0
k__Bacteria	p__Aquificae	c__Aquificae	o__Aquificales	f__Hydrogenothermaceae	g__Persephonella	s__Persephonella_hydrogeniphila	0	0	0	3	0	0	0	0	0	0	0	0	0	0	0	0	0	0	0	0
k__Bacteria	p__Aquificae	c__Aquificae	o__Aquificales	f__Hydrogenothermaceae	g__Persephonella	s__Persephonella_sp._IF05_L8	0	0	0	0	0	0	0	0	0	0	0	0	3	0	0	0	0	0	0	0
k__Bacteria	p__Aquificae	c__Aquificae	o__Aquificales	f__Hydrogenothermaceae	g__Sulfurihydrogenibium	s__Sulfurihydrogenibium_yellowstonense	0	0	0	0	0	0	0	0	0	6	0	0	0	0	0	0	0	0	0	0
k__Bacteria	p__Aquificae	c__Aquificae	o__Desulfurobacteriales	f__Desulfurobacteriaceae	g__Desulfurobacterium	s__Desulfurobacterium_indicum	0	0	0	5	0	0	0	0	0	0	0	0	0	0	0	0	0	0	0	0
k__Bacteria	p__Aquificae	c__Aquificae	o__Desulfurobacteriales	f__Desulfurobacteriaceae	g__Desulfurobacterium	s__Desulfurobacterium_sp.	0	0	0	37	0	0	0	0	0	0	0	0	0	0	0	0	0	0	0	0
k__Bacteria	p__Aquificae	c__Aquificae	o__Desulfurobacteriales	f__Desulfurobacteriaceae	g__Desulfurobacterium	s__Desulfurobacterium_thermolithotrophum	0	72	0	0	0	0	0	0	0	16	0	0	0	0	0	0	0	0	0	0
k__Bacteria	p__Aquificae	c__Aquificae	o__Desulfurobacteriales	f__Desulfurobacteriaceae	g__Thermovibrio	s__Thermovibrio_sp.	0	0	0	12	0	0	0	0	0	0	0	0	0	0	0	0	0	0	0	0
k__Bacteria	p__Aquificae	c__Unclassified	o__Unclassified	f__Unclassified	g__Unclassified	s__Aquificae_bacterium	6	0	0	64	0	0	0	0	0	0	0	0	0	0	0	0	0	0	0	0
k__Bacteria	p__Armatimonadetes	c__Unclassified	o__Unclassified	f__Unclassified	g__Unclassified	s__Armatimonadetes_bacterium	0	0	0	0	0	0	0	3	3	0	0	0	0	0	0	0	0	0	0	0
k__Bacteria	p__Armatimonadetes	c__Unclassified	o__Unclassified	f__Unclassified	g__Unclassified	s__Armatimonadetes_bacterium_Uphvl_Ar2	0	0	3	0	0	0	3	0	0	0	0	0	0	0	0	0	0	0	0	0
k__Bacteria	p__Atribacterota	c__Unclassified	o__Unclassified	f__Unclassified	g__Unclassified	s__Candidatus_Atribacteria_bacterium_CG2_30_33_13	0	0	0	37	0	0	0	0	0	0	0	0	0	0	0	0	0	0	0	0
k__Bacteria	p__Atribacterota	c__Unclassified	o__Unclassified	f__Unclassified	g__Unclassified	s__Candidatus_Atribacteria_bacterium_HGW_Atribacteria_1	0	0	0	6	0	0	0	0	0	0	0	0	0	0	0	0	0	0	0	0
k__Bacteria	p__Bacteroidetes	c__Bacteroidia	o__Bacteroidales	f__Bacteroidaceae	g__Bacteroides	s__Bacteroides_acidifaciens	4	39	0	8	0	0	0	0	0	0	0	0	0	0	0	0	0	0	0	0
k__Bacteria	p__Bacteroidetes	c__Bacteroidia	o__Bacteroidales	f__Bacteroidaceae	g__Bacteroides	s__Bacteroides_bouchesdurhonensis	12	53	0	64	0	0	8	0	5	9	0	0	0	0	0	0	0	0	0	0
k__Bacteria	p__Bacteroidetes	c__Bacteroidia	o__Bacteroidales	f__Bacteroidaceae	g__Bacteroides	s__Bacteroides_caccae	30	195	0	33	0	0	0	0	0	47	0	0	0	0	0	0	0	0	0	0
k__Bacteria	p__Bacteroidetes	c__Bacteroidia	o__Bacteroidales	f__Bacteroidaceae	g__Bacteroides	s__Bacteroides_caecimuris	8	0	0	12	0	0	0	0	0	0	0	0	0	0	0	0	0	0	0	0
k__Bacteria	p__Bacteroidetes	c__Bacteroidia	o__Bacteroidales	f__Bacteroidaceae	g__Bacteroides	s__Bacteroides_cellulosilyticus	4	36	0	26	0	0	0	0	5	0	0	0	0	0	0	0	0	0	0	0
k__Bacteria	p__Bacteroidetes	c__Bacteroidia	o__Bacteroidales	f__Bacteroidaceae	g__Bacteroides	s__Bacteroides_clarus	7	10	3	7	0	0	4	0	0	59	0	0	0	0	0	0	0	0	0	0
k__Bacteria	p__Bacteroidetes	c__Bacteroidia	o__Bacteroidales	f__Bacteroidaceae	g__Bacteroides	s__Bacteroides_congonensis	0	8	0	8	0	0	0	0	0	0	0	0	0	0	0	0	0	0	0	0
k__Bacteria	p__Bacteroidetes	c__Bacteroidia	o__Bacteroidales	f__Bacteroidaceae	g__Bacteroides	s__Bacteroides_coprocola_CAG_162	0	0	0	0	0	0	5	0	0	0	0	0	0	0	0	0	0	0	0	0
k__Bacteria	p__Bacteroidetes	c__Bacteroidia	o__Bacteroidales	f__Bacteroidaceae	g__Bacteroides	s__Bacteroides_coprosuis	0	10	0	15	0	0	0	0	0	0	0	0	0	0	0	0	0	0	0	0
k__Bacteria	p__Bacteroidetes	c__Bacteroidia	o__Bacteroidales	f__Bacteroidaceae	g__Bacteroides	s__Bacteroides_cutis	0	0	0	0	0	0	0	0	0	0	0	0	0	0	0	0	0	0	0	0
k__Bacteria	p__Bacteroidetes	c__Bacteroidia	o__Bacteroidales	f__Bacteroidaceae	g__Bacteroides	s__Bacteroides_dorei_CAG_222	0	0	0	3	0	0	0	0	0	0	0	0	0	0	0	0	0	0	0	0
k__Bacteria	p__Bacteroidetes	c__Bacteroidia	o__Bacteroidales	f__Bacteroidaceae	g__Bacteroides	s__Bacteroides_eggerthii	42	478	42	329	0	12	82	3	27	133	0	0	0	0	0	0	0	0	0	0
k__Bacteria	p__Bacteroidetes	c__Bacteroidia	o__Bacteroidales	f__Bacteroidaceae	g__Bacteroides	s__Bacteroides_faecalis	18	0	0	69	0	0	23	0	0	11	0	0	0	0	0	0	0	0	0	0
k__Bacteria	p__Bacteroidetes	c__Bacteroidia	o__Bacteroidales	f__Bacteroidaceae	g__Bacteroides	s__Bacteroides_faecichinchillae	5	4	0	35	0	0	0	0	0	0	0	0	0	0	0	0	0	0	0	0
k__Bacteria	p__Bacteroidetes	c__Bacteroidia	o__Bacteroidales	f__Bacteroidaceae	g__Bacteroides	s__Bacteroides_faecis	0	7	0	8	0	0	0	0	0	50	0	0	0	0	0	0	0	0	0	0
k__Bacteria	p__Bacteroidetes	c__Bacteroidia	o__Bacteroidales	f__Bacteroidaceae	g__Bacteroides	s__Bacteroides_finegoldii	8	92	0	42	0	0	6	0	3	63	0	0	0	0	0	0	0	0	0	0
k__Bacteria	p__Bacteroidetes	c__Bacteroidia	o__Bacteroidales	f__Bacteroidaceae	g__Bacteroides	s__Bacteroides_fluxus	0	8	0	38	0	0	0	0	3	0	0	0	0	0	0	0	0	0	0	0
k__Bacteria	p__Bacteroidetes	c__Bacteroidia	o__Bacteroidales	f__Bacteroidaceae	g__Bacteroides	s__Bacteroides_fragilis	134	460	10	327	0	8	111	0	31	496	0	0	0	0	0	0	0	0	0	0
k__Bacteria	p__Bacteroidetes	c__Bacteroidia	o__Bacteroidales	f__Bacteroidaceae	g__Bacteroides	s__Bacteroides_fragilis_CAG_47	0	0	0	12	0	0	0	0	0	0	0	0	0	0	0	0	0	0	0	0
k__Bacteria	p__Bacteroidetes	c__Bacteroidia	o__Bacteroidales	f__Bacteroidaceae	g__Bacteroides	s__Bacteroides_gallinarum	0	4	0	0	0	0	0	0	0	0	0	0	0	0	0	0	0	0	0	0
k__Bacteria	p__Bacteroidetes	c__Bacteroidia	o__Bacteroidales	f__Bacteroidaceae	g__Bacteroides	s__Bacteroides_graminisolvens	0	4	0	19	0	0	0	0	0	0	0	0	0	0	0	0	0	0	0	0
k__Bacteria	p__Bacteroidetes	c__Bacteroidia	o__Bacteroidales	f__Bacteroidaceae	g__Bacteroides	s__Bacteroides_helcogenes	8	76	0	6	0	0	0	0	0	13	0	0	0	0	0	0	0	0	0	0
k__Bacteria	p__Bacteroidetes	c__Bacteroidia	o__Bacteroidales	f__Bacteroidaceae	g__Bacteroides	s__Bacteroides_heparinolyticus	149	192	6	268	0	16	208	0	45	130	0	0	0	0	0	0	0	0	0	0
k__Bacteria	p__Bacteroidetes	c__Bacteroidia	o__Bacteroidales	f__Bacteroidaceae	g__Bacteroides	s__Bacteroides_ihuae	5	55	0	0	0	0	0	0	0	6	0	0	0	0	0	0	0	0	0	0
k__Bacteria	p__Bacteroidetes	c__Bacteroidia	o__Bacteroidales	f__Bacteroidaceae	g__Bacteroides	s__Bacteroides_ilei	0	11	0	8	0	0	4	0	0	62	0	0	0	0	0	0	0	0	0	0
k__Bacteria	p__Bacteroidetes	c__Bacteroidia	o__Bacteroidales	f__Bacteroidaceae	g__Bacteroides	s__Bacteroides_intestinalis	30	137	4	148	0	0	4	0	21	118	0	0	0	0	0	0	0	0	0	0
k__Bacteria	p__Bacteroidetes	c__Bacteroidia	o__Bacteroidales	f__Bacteroidaceae	g__Bacteroides	s__Bacteroides_intestinalis_CAG_564	0	0	16	0	0	0	0	0	0	0	0	0	0	0	0	0	0	0	0	0
k__Bacteria	p__Bacteroidetes	c__Bacteroidia	o__Bacteroidales	f__Bacteroidaceae	g__Bacteroides	s__Bacteroides_luti	79	20	0	36	0	0	0	0	4	3	0	0	0	0	0	0	0	0	0	0
k__Bacteria	p__Bacteroidetes	c__Bacteroidia	o__Bacteroidales	f__Bacteroidaceae	g__Bacteroides	s__Bacteroides_mediterraneensis	5	0	0	0	0	0	0	0	0	0	0	0	0	0	0	0	0	0	0	0
k__Bacteria	p__Bacteroidetes	c__Bacteroidia	o__Bacteroidales	f__Bacteroidaceae	g__Bacteroides	s__Bacteroides_ndongoniae	5	41	0	7	0	0	0	0	2	0	0	0	0	0	0	0	0	0	0	0
k__Bacteria	p__Bacteroidetes	c__Bacteroidia	o__Bacteroidales	f__Bacteroidaceae	g__Bacteroides	s__Bacteroides_neonati	16	0	0	16	0	0	0	0	2	6	0	0	0	0	0	0	0	0	0	0
k__Bacteria	p__Bacteroidetes	c__Bacteroidia	o__Bacteroidales	f__Bacteroidaceae	g__Bacteroides	s__Bacteroides_nordii	3	0	0	7	0	0	0	0	0	0	0	0	0	0	0	0	0	0	0	0
k__Bacteria	p__Bacteroidetes	c__Bacteroidia	o__Bacteroidales	f__Bacteroidaceae	g__Bacteroides	s__Bacteroides_oleiciplenus	4	30	3	0	0	0	0	0	5	7	0	0	0	0	0	0	0	0	0	0
k__Bacteria	p__Bacteroidetes	c__Bacteroidia	o__Bacteroidales	f__Bacteroidaceae	g__Bacteroides	s__Bacteroides_ovatus	176	249	6	86	0	4	26	0	40	166	0	0	0	0	0	0	0	0	0	0
k__Bacteria	p__Bacteroidetes	c__Bacteroidia	o__Bacteroidales	f__Bacteroidaceae	g__Bacteroides	s__Bacteroides_ovatus_CAG_22	0	0	0	0	0	0	0	0	0	6	0	0	0	0	0	0	0	0	0	0
k__Bacteria	p__Bacteroidetes	c__Bacteroidia	o__Bacteroidales	f__Bacteroidaceae	g__Bacteroides	s__Bacteroides_plebeius_CAG_211	0	0	28	0	0	0	0	0	0	0	0	0	0	0	0	0	0	0	0	0
k__Bacteria	p__Bacteroidetes	c__Bacteroidia	o__Bacteroidales	f__Bacteroidaceae	g__Bacteroides	s__Bacteroides_propionicifaciens	0	0	0	4	0	0	0	0	9	0	0	0	0	0	0	0	0	0	0	0
k__Bacteria	p__Bacteroidetes	c__Bacteroidia	o__Bacteroidales	f__Bacteroidaceae	g__Bacteroides	s__Bacteroides_pyogenes	17	118	0	205	0	0	25	0	9	51	0	0	0	0	0	0	0	0	0	0
k__Bacteria	p__Bacteroidetes	c__Bacteroidia	o__Bacteroidales	f__Bacteroidaceae	g__Bacteroides	s__Bacteroides_reticulotermitis	0	0	0	50	0	0	4	0	0	0	0	0	0	0	0	0	0	0	0	0
k__Bacteria	p__Bacteroidetes	c__Bacteroidia	o__Bacteroidales	f__Bacteroidaceae	g__Bacteroides	s__Bacteroides_rodentium	6	30	0	0	0	0	5	0	0	0	0	0	0	0	0	0	0	0	0	0
k__Bacteria	p__Bacteroidetes	c__Bacteroidia	o__Bacteroidales	f__Bacteroidaceae	g__Bacteroides	s__Bacteroides_salyersiae	0	8	0	88	0	0	0	0	8	0	0	0	0	0	0	0	0	0	0	0
k__Bacteria	p__Bacteroidetes	c__Bacteroidia	o__Bacteroidales	f__Bacteroidaceae	g__Bacteroides	s__Bacteroides_sp._14_A_	0	36	0	0	0	0	4	0	4	7	0	0	0	0	0	0	0	0	0	0
k__Bacteria	p__Bacteroidetes	c__Bacteroidia	o__Bacteroidales	f__Bacteroidaceae	g__Bacteroides	s__Bacteroides_sp._1_1_14	2	9	0	8	0	0	6	0	0	25	0	0	0	0	0	0	0	0	0	0
k__Bacteria	p__Bacteroidetes	c__Bacteroidia	o__Bacteroidales	f__Bacteroidaceae	g__Bacteroides	s__Bacteroides_sp._1_1_30	12	241	7	39	0	0	4	0	3	12	0	0	0	0	0	0	0	0	0	0
k__Bacteria	p__Bacteroidetes	c__Bacteroidia	o__Bacteroidales	f__Bacteroidaceae	g__Bacteroides	s__Bacteroides_sp._2_1_22	0	0	0	11	0	0	0	0	0	0	0	0	0	0	0	0	0	0	0	0
k__Bacteria	p__Bacteroidetes	c__Bacteroidia	o__Bacteroidales	f__Bacteroidaceae	g__Bacteroides	s__Bacteroides_sp._2_2_4	4	39	0	19	0	0	0	0	2	8	0	0	0	0	0	0	0	0	0	0
k__Bacteria	p__Bacteroidetes	c__Bacteroidia	o__Bacteroidales	f__Bacteroidaceae	g__Bacteroides	s__Bacteroides_sp._3_1_13	0	0	0	39	0	0	0	0	0	0	0	0	0	0	0	0	0	0	0	0
k__Bacteria	p__Bacteroidetes	c__Bacteroidia	o__Bacteroidales	f__Bacteroidaceae	g__Bacteroides	s__Bacteroides_sp._3_1_19	0	0	0	13	0	0	5	0	0	0	0	0	0	0	0	0	0	0	0	0
k__Bacteria	p__Bacteroidetes	c__Bacteroidia	o__Bacteroidales	f__Bacteroidaceae	g__Bacteroides	s__Bacteroides_sp._3_1_23	3	0	0	17	0	0	0	0	0	0	0	0	0	0	0	0	0	0	0	0
k__Bacteria	p__Bacteroidetes	c__Bacteroidia	o__Bacteroidales	f__Bacteroidaceae	g__Bacteroides	s__Bacteroides_sp._3_1_33FAA	0	7	0	7	0	0	34	0	0	0	0	0	0	0	0	0	0	0	0	0
k__Bacteria	p__Bacteroidetes	c__Bacteroidia	o__Bacteroidales	f__Bacteroidaceae	g__Bacteroides	s__Bacteroides_sp._3_1_40A	0	0	0	36	0	0	0	0	0	0	0	0	0	0	0	0	0	0	0	0
k__Bacteria	p__Bacteroidetes	c__Bacteroidia	o__Bacteroidales	f__Bacteroidaceae	g__Bacteroides	s__Bacteroides_sp._41_26	0	0	0	4	0	0	0	0	0	0	0	0	0	0	0	0	0	0	0	0
k__Bacteria	p__Bacteroidetes	c__Bacteroidia	o__Bacteroidales	f__Bacteroidaceae	g__Bacteroides	s__Bacteroides_sp._43_108	81	72	8	11	0	0	0	0	73	14	0	0	0	0	0	0	0	0	0	0
k__Bacteria	p__Bacteroidetes	c__Bacteroidia	o__Bacteroidales	f__Bacteroidaceae	g__Bacteroides	s__Bacteroides_sp._4_1_36	0	0	0	0	0	0	0	0	0	16	0	0	0	0	0	0	0	0	0	0
k__Bacteria	p__Bacteroidetes	c__Bacteroidia	o__Bacteroidales	f__Bacteroidaceae	g__Bacteroides	s__Bacteroides_sp._4_3_47FAA	0	0	0	0	0	0	0	0	0	0	0	0	0	0	0	0	0	0	0	0
k__Bacteria	p__Bacteroidetes	c__Bacteroidia	o__Bacteroidales	f__Bacteroidaceae	g__Bacteroides	s__Bacteroides_sp._9_1_42FAA	34	53	5	0	0	0	0	0	0	0	0	0	0	0	0	0	0	0	0	0
k__Bacteria	p__Bacteroidetes	c__Bacteroidia	o__Bacteroidales	f__Bacteroidaceae	g__Bacteroides	s__Bacteroides_sp._AF14_46	0	13	0	0	0	0	0	0	0	5	0	0	0	0	0	0	0	0	0	0
k__Bacteria	p__Bacteroidetes	c__Bacteroidia	o__Bacteroidales	f__Bacteroidaceae	g__Bacteroides	s__Bacteroides_sp._AF17_1	0	0	0	0	0	0	0	0	0	0	0	0	0	0	0	0	0	0	0	0
k__Bacteria	p__Bacteroidetes	c__Bacteroidia	o__Bacteroidales	f__Bacteroidaceae	g__Bacteroides	s__Bacteroides_sp._AF25_38AC	0	0	0	0	0	0	0	0	6	0	0	0	0	0	0	0	0	0	0	0
k__Bacteria	p__Bacteroidetes	c__Bacteroidia	o__Bacteroidales	f__Bacteroidaceae	g__Bacteroides	s__Bacteroides_sp._AF26_10BH	10	58	0	8	0	0	6	0	3	38	0	0	0	0	0	0	0	0	0	0
k__Bacteria	p__Bacteroidetes	c__Bacteroidia	o__Bacteroidales	f__Bacteroidaceae	g__Bacteroides	s__Bacteroides_sp._AF39_10AT	7	0	0	0	0	0	0	0	0	0	0	0	0	0	0	0	0	0	0	0
k__Bacteria	p__Bacteroidetes	c__Bacteroidia	o__Bacteroidales	f__Bacteroidaceae	g__Bacteroides	s__Bacteroides_sp._AF39_11AC	0	6	0	3	0	0	0	0	0	0	0	0	0	0	0	0	0	0	0	0
k__Bacteria	p__Bacteroidetes	c__Bacteroidia	o__Bacteroidales	f__Bacteroidaceae	g__Bacteroides	s__Bacteroides_sp._AF39_16AC	0	5	0	0	0	0	0	0	0	67	0	0	0	0	0	0	0	0	0	0
k__Bacteria	p__Bacteroidetes	c__Bacteroidia	o__Bacteroidales	f__Bacteroidaceae	g__Bacteroides	s__Bacteroides_sp._AM07_16	0	0	0	0	0	0	0	0	0	12	0	0	0	0	0	0	0	0	0	0
k__Bacteria	p__Bacteroidetes	c__Bacteroidia	o__Bacteroidales	f__Bacteroidaceae	g__Bacteroides	s__Bacteroides_sp._AM10_21B	12	16	0	0	0	0	0	0	0	0	0	0	0	0	0	0	0	0	0	0
k__Bacteria	p__Bacteroidetes	c__Bacteroidia	o__Bacteroidales	f__Bacteroidaceae	g__Bacteroides	s__Bacteroides_sp._AM23_12	0	3	2	28	0	0	0	0	0	9	0	0	0	0	0	0	0	0	0	0
k__Bacteria	p__Bacteroidetes	c__Bacteroidia	o__Bacteroidales	f__Bacteroidaceae	g__Bacteroides	s__Bacteroides_sp._AM25_34	0	0	0	12	0	0	0	0	0	0	0	0	0	0	0	0	0	0	0	0
k__Bacteria	p__Bacteroidetes	c__Bacteroidia	o__Bacteroidales	f__Bacteroidaceae	g__Bacteroides	s__Bacteroides_sp._AM26_11	0	0	0	0	0	0	0	0	13	6	0	0	0	0	0	0	0	0	0	0
k__Bacteria	p__Bacteroidetes	c__Bacteroidia	o__Bacteroidales	f__Bacteroidaceae	g__Bacteroides	s__Bacteroides_sp._AM37_9	0	0	0	0	0	0	0	0	0	3	0	0	0	0	0	0	0	0	0	0
k__Bacteria	p__Bacteroidetes	c__Bacteroidia	o__Bacteroidales	f__Bacteroidaceae	g__Bacteroides	s__Bacteroides_sp._AM44_19	0	0	0	4	0	0	0	0	4	3	0	0	0	0	0	0	0	0	0	0
k__Bacteria	p__Bacteroidetes	c__Bacteroidia	o__Bacteroidales	f__Bacteroidaceae	g__Bacteroides	s__Bacteroides_sp._AR20	0	0	0	9	0	0	5	0	0	0	0	0	0	0	0	0	0	0	0	0
k__Bacteria	p__Bacteroidetes	c__Bacteroidia	o__Bacteroidales	f__Bacteroidaceae	g__Bacteroides	s__Bacteroides_sp._An19	0	0	0	9	0	0	0	0	5	0	0	0	0	0	0	0	0	0	0	0
k__Bacteria	p__Bacteroidetes	c__Bacteroidia	o__Bacteroidales	f__Bacteroidaceae	g__Bacteroides	s__Bacteroides_sp._An279	0	33	0	21	0	0	0	0	0	0	0	0	0	0	0	0	0	0	0	0
k__Bacteria	p__Bacteroidetes	c__Bacteroidia	o__Bacteroidales	f__Bacteroidaceae	g__Bacteroides	s__Bacteroides_sp._An322	0	29	0	32	0	0	0	0	0	45	0	0	0	0	0	0	0	0	0	0
k__Bacteria	p__Bacteroidetes	c__Bacteroidia	o__Bacteroidales	f__Bacteroidaceae	g__Bacteroides	s__Bacteroides_sp._An51A	0	30	0	25	0	0	0	0	6	29	0	0	0	0	0	0	0	0	0	0
k__Bacteria	p__Bacteroidetes	c__Bacteroidia	o__Bacteroidales	f__Bacteroidaceae	g__Bacteroides	s__Bacteroides_sp._CAG_1060_57_27	34	0	0	7	0	0	0	0	0	0	0	0	0	0	0	0	0	0	0	0
k__Bacteria	p__Bacteroidetes	c__Bacteroidia	o__Bacteroidales	f__Bacteroidaceae	g__Bacteroides	s__Bacteroides_sp._CAG_1076	0	0	38	0	0	0	0	0	0	44	0	0	0	0	0	0	0	0	0	0
k__Bacteria	p__Bacteroidetes	c__Bacteroidia	o__Bacteroidales	f__Bacteroidaceae	g__Bacteroides	s__Bacteroides_sp._CAG_144	0	0	0	87	0	0	5	0	0	0	0	0	0	0	0	0	0	0	0	0
k__Bacteria	p__Bacteroidetes	c__Bacteroidia	o__Bacteroidales	f__Bacteroidaceae	g__Bacteroides	s__Bacteroides_sp._CAG_189	0	0	0	81	0	0	0	0	0	0	0	0	0	0	0	0	0	0	0	0
k__Bacteria	p__Bacteroidetes	c__Bacteroidia	o__Bacteroidales	f__Bacteroidaceae	g__Bacteroides	s__Bacteroides_sp._CAG_443	52	0	0	27	0	0	0	0	0	0	0	0	0	0	0	0	0	0	0	0
k__Bacteria	p__Bacteroidetes	c__Bacteroidia	o__Bacteroidales	f__Bacteroidaceae	g__Bacteroides	s__Bacteroides_sp._CAG_462	46	0	0	0	0	0	0	0	0	0	0	0	0	0	0	0	0	0	0	0
k__Bacteria	p__Bacteroidetes	c__Bacteroidia	o__Bacteroidales	f__Bacteroidaceae	g__Bacteroides	s__Bacteroides_sp._CAG_530	15	62	0	3	0	0	0	0	0	10	0	0	0	0	0	0	0	0	0	0
k__Bacteria	p__Bacteroidetes	c__Bacteroidia	o__Bacteroidales	f__Bacteroidaceae	g__Bacteroides	s__Bacteroides_sp._CAG_545	0	0	0	4	0	0	0	0	0	0	0	0	0	0	0	0	0	0	0	0
k__Bacteria	p__Bacteroidetes	c__Bacteroidia	o__Bacteroidales	f__Bacteroidaceae	g__Bacteroides	s__Bacteroides_sp._CAG_598	0	0	0	4	0	0	0	0	0	0	0	0	0	0	0	0	0	0	0	0
k__Bacteria	p__Bacteroidetes	c__Bacteroidia	o__Bacteroidales	f__Bacteroidaceae	g__Bacteroides	s__Bacteroides_sp._CAG_633	0	0	0	13	0	0	0	0	0	0	0	0	0	0	0	0	0	0	0	0
k__Bacteria	p__Bacteroidetes	c__Bacteroidia	o__Bacteroidales	f__Bacteroidaceae	g__Bacteroides	s__Bacteroides_sp._CAG_661	0	7	0	0	0	0	0	0	0	20	0	0	0	0	0	0	0	0	0	0
k__Bacteria	p__Bacteroidetes	c__Bacteroidia	o__Bacteroidales	f__Bacteroidaceae	g__Bacteroides	s__Bacteroides_sp._CAG_709	9	24	0	3	0	0	0	0	0	7	0	0	0	0	0	0	0	0	0	0
k__Bacteria	p__Bacteroidetes	c__Bacteroidia	o__Bacteroidales	f__Bacteroidaceae	g__Bacteroides	s__Bacteroides_sp._CAG_714	0	3	0	0	0	0	0	0	0	30	0	0	0	0	0	0	0	0	0	0
k__Bacteria	p__Bacteroidetes	c__Bacteroidia	o__Bacteroidales	f__Bacteroidaceae	g__Bacteroides	s__Bacteroides_sp._CAG_754	0	0	0	0	0	0	0	0	0	16	0	0	0	0	0	0	0	0	0	0
k__Bacteria	p__Bacteroidetes	c__Bacteroidia	o__Bacteroidales	f__Bacteroidaceae	g__Bacteroides	s__Bacteroides_sp._CAG_770	30	10	0	0	0	0	0	0	0	5	0	0	0	0	0	0	0	0	0	0
k__Bacteria	p__Bacteroidetes	c__Bacteroidia	o__Bacteroidales	f__Bacteroidaceae	g__Bacteroides	s__Bacteroides_sp._CAG_875	20	41	0	3	0	0	0	0	0	0	0	0	0	0	0	0	0	0	0	0
k__Bacteria	p__Bacteroidetes	c__Bacteroidia	o__Bacteroidales	f__Bacteroidaceae	g__Bacteroides	s__Bacteroides_sp._CAG_927	0	0	0	0	0	0	0	0	0	7	0	0	0	0	0	0	0	0	0	0
k__Bacteria	p__Bacteroidetes	c__Bacteroidia	o__Bacteroidales	f__Bacteroidaceae	g__Bacteroides	s__Bacteroides_sp._D2	2	9	0	43	0	0	0	0	0	6	0	0	0	0	0	0	0	0	0	0
k__Bacteria	p__Bacteroidetes	c__Bacteroidia	o__Bacteroidales	f__Bacteroidaceae	g__Bacteroides	s__Bacteroides_sp._D20	0	24	0	3	0	0	0	0	0	91	0	0	0	0	0	0	0	0	0	0
k__Bacteria	p__Bacteroidetes	c__Bacteroidia	o__Bacteroidales	f__Bacteroidaceae	g__Bacteroides	s__Bacteroides_sp._D22	0	10	0	0	0	0	0	0	0	0	0	0	0	0	0	0	0	0	0	0
k__Bacteria	p__Bacteroidetes	c__Bacteroidia	o__Bacteroidales	f__Bacteroidaceae	g__Bacteroides	s__Bacteroides_sp._HMSC068A09	0	0	0	0	0	0	0	0	0	3	0	0	0	0	0	0	0	0	0	0
k__Bacteria	p__Bacteroidetes	c__Bacteroidia	o__Bacteroidales	f__Bacteroidaceae	g__Bacteroides	s__Bacteroides_sp._HMSC073E02	0	0	0	0	0	0	0	0	0	48	0	0	0	0	0	0	0	0	0	0
k__Bacteria	p__Bacteroidetes	c__Bacteroidia	o__Bacteroidales	f__Bacteroidaceae	g__Bacteroides	s__Bacteroides_sp._HPS0048	0	5	0	0	0	0	0	0	0	6	0	0	0	0	0	0	0	0	0	0
k__Bacteria	p__Bacteroidetes	c__Bacteroidia	o__Bacteroidales	f__Bacteroidaceae	g__Bacteroides	s__Bacteroides_sp._KFT8	0	0	14	0	0	0	0	0	9	0	0	0	0	0	0	0	0	0	0	0
k__Bacteria	p__Bacteroidetes	c__Bacteroidia	o__Bacteroidales	f__Bacteroidaceae	g__Bacteroides	s__Bacteroides_sp._Marseille_P3684	34	43	0	13	0	3	0	0	0	60	0	0	0	0	0	0	0	0	0	0
k__Bacteria	p__Bacteroidetes	c__Bacteroidia	o__Bacteroidales	f__Bacteroidaceae	g__Bacteroides	s__Bacteroides_sp._OF04_15BH	29	0	0	12	0	0	8	0	8	93	0	0	0	0	0	0	0	0	0	0
k__Bacteria	p__Bacteroidetes	c__Bacteroidia	o__Bacteroidales	f__Bacteroidaceae	g__Bacteroides	s__Bacteroides_sp._SM23_62	0	0	0	79	0	0	0	0	0	4	0	0	0	0	0	0	0	0	0	0
k__Bacteria	p__Bacteroidetes	c__Bacteroidia	o__Bacteroidales	f__Bacteroidaceae	g__Bacteroides	s__Bacteroides_sp._SM23_62_1	0	0	0	19	0	0	0	0	0	0	0	0	0	0	0	0	0	0	0	0
k__Bacteria	p__Bacteroidetes	c__Bacteroidia	o__Bacteroidales	f__Bacteroidaceae	g__Bacteroides	s__Bacteroides_stercorirosoris	0	0	0	12	0	0	3	0	0	4	0	0	0	0	0	0	0	0	0	0
k__Bacteria	p__Bacteroidetes	c__Bacteroidia	o__Bacteroidales	f__Bacteroidaceae	g__Bacteroides	s__Bacteroides_stercoris	62	74	0	140	0	0	85	0	20	210	0	0	0	0	0	0	0	0	0	0
k__Bacteria	p__Bacteroidetes	c__Bacteroidia	o__Bacteroidales	f__Bacteroidaceae	g__Bacteroides	s__Bacteroides_stercoris_CAG_120	9	0	0	0	0	0	0	0	0	3	0	0	0	0	0	0	0	0	0	0
k__Bacteria	p__Bacteroidetes	c__Bacteroidia	o__Bacteroidales	f__Bacteroidaceae	g__Bacteroides	s__Bacteroides_thetaiotaomicron	81	34	0	89	0	11	77	0	16	25	0	0	0	0	0	0	0	0	0	0
k__Bacteria	p__Bacteroidetes	c__Bacteroidia	o__Bacteroidales	f__Bacteroidaceae	g__Bacteroides	s__Bacteroides_timonensis	6	0	0	17	0	0	5	0	3	0	0	0	0	0	0	0	0	0	0	0
k__Bacteria	p__Bacteroidetes	c__Bacteroidia	o__Bacteroidales	f__Bacteroidaceae	g__Bacteroides	s__Bacteroides_togonis	0	4	0	13	0	0	0	0	4	0	0	0	0	0	0	0	0	0	0	0
k__Bacteria	p__Bacteroidetes	c__Bacteroidia	o__Bacteroidales	f__Bacteroidaceae	g__Bacteroides	s__Bacteroides_uniformis	53	283	0	66	0	12	16	0	0	155	0	0	0	0	0	0	0	0	0	0
k__Bacteria	p__Bacteroidetes	c__Bacteroidia	o__Bacteroidales	f__Bacteroidaceae	g__Bacteroides	s__Bacteroides_xylanisolvens	9	18	2	33	0	0	7	0	0	67	0	0	0	0	0	0	0	0	0	0
k__Bacteria	p__Bacteroidetes	c__Bacteroidia	o__Bacteroidales	f__Bacteroidaceae	g__Bacteroides	s__Bacteroides_zoogleoformans	0	0	0	67	0	0	0	0	0	62	0	0	0	0	0	0	0	0	0	0
k__Bacteria	p__Bacteroidetes	c__Bacteroidia	o__Bacteroidales	f__Bacteroidaceae	g__Bacteroides	s__Unclassified	276	1351	53	638	0	2	300	0	121	755	0	0	0	0	0	0	0	0	0	0
k__Bacteria	p__Bacteroidetes	c__Bacteroidia	o__Bacteroidales	f__Bacteroidaceae	g__Bacteroides	s__uncultured_Bacteroides_sp.	35	0	0	44	0	0	0	0	0	6	0	0	0	0	0	0	0	0	0	0
k__Bacteria	p__Bacteroidetes	c__Bacteroidia	o__Bacteroidales	f__Bacteroidaceae	g__Mediterranea	s__Mediterranea_massiliensis	35	4	0	54	0	0	0	0	0	3	0	0	0	0	0	0	0	0	0	0
k__Bacteria	p__Bacteroidetes	c__Bacteroidia	o__Bacteroidales	f__Bacteroidaceae	g__Mediterranea	s__Mediterranea_sp._An20	11	0	0	34	0	0	0	0	0	21	0	0	0	0	0	0	0	0	0	0
k__Bacteria	p__Bacteroidetes	c__Bacteroidia	o__Bacteroidales	f__Bacteroidaceae	g__Phocaeicola	s__Phocaeicola_abscessus	35	35	0	21	0	0	0	0	25	66	0	0	0	0	0	0	0	0	0	0
k__Bacteria	p__Bacteroidetes	c__Bacteroidia	o__Bacteroidales	f__Bacteroidaceae	g__Phocaeicola	s__Phocaeicola_barnesiae	13	36	0	9	0	0	0	0	5	5	0	0	0	0	0	0	0	0	0	0
k__Bacteria	p__Bacteroidetes	c__Bacteroidia	o__Bacteroidales	f__Bacteroidaceae	g__Phocaeicola	s__Phocaeicola_coprocola	4	49	0	2	0	0	0	0	0	0	0	0	0	0	0	0	0	0	0	0
k__Bacteria	p__Bacteroidetes	c__Bacteroidia	o__Bacteroidales	f__Bacteroidaceae	g__Phocaeicola	s__Phocaeicola_dorei	22	113	0	30	0	0	7	0	0	8	0	0	0	0	0	0	0	0	0	0
k__Bacteria	p__Bacteroidetes	c__Bacteroidia	o__Bacteroidales	f__Bacteroidaceae	g__Phocaeicola	s__Phocaeicola_massiliensis	0	5	0	0	0	0	0	0	0	0	0	0	0	0	0	0	0	0	0	0
k__Bacteria	p__Bacteroidetes	c__Bacteroidia	o__Bacteroidales	f__Bacteroidaceae	g__Phocaeicola	s__Phocaeicola_paurosaccharolyticus	7	4	0	54	0	0	0	0	7	16	0	0	0	0	0	0	0	0	0	0
k__Bacteria	p__Bacteroidetes	c__Bacteroidia	o__Bacteroidales	f__Bacteroidaceae	g__Phocaeicola	s__Phocaeicola_plebeius	88	419	3	91	0	0	4	0	5	30	0	0	0	0	0	0	0	0	0	0
k__Bacteria	p__Bacteroidetes	c__Bacteroidia	o__Bacteroidales	f__Bacteroidaceae	g__Phocaeicola	s__Phocaeicola_salanitronis	9	8	0	20	0	0	0	0	4	0	0	0	0	0	0	0	0	0	0	0
k__Bacteria	p__Bacteroidetes	c__Bacteroidia	o__Bacteroidales	f__Bacteroidaceae	g__Phocaeicola	s__Phocaeicola_sartorii	28	84	0	42	0	0	0	0	4	36	0	0	0	0	0	0	0	0	0	0
k__Bacteria	p__Bacteroidetes	c__Bacteroidia	o__Bacteroidales	f__Bacteroidaceae	g__Phocaeicola	s__Phocaeicola_vulgatus	74	1143	4	227	0	0	56	0	22	407	0	0	0	0	0	0	0	0	0	0
k__Bacteria	p__Bacteroidetes	c__Bacteroidia	o__Bacteroidales	f__Bacteroidaceae	g__Phocaeicola	s__Unclassified	6	0	0	23	0	0	0	0	0	0	0	0	0	0	0	0	0	0	0	0
k__Bacteria	p__Bacteroidetes	c__Bacteroidia	o__Bacteroidales	f__Bacteroidaceae	g__Unclassified	s__Unclassified	73	422	2	199	0	92	45	0	20	34	0	0	0	0	0	0	0	0	0	0
k__Bacteria	p__Bacteroidetes	c__Bacteroidia	o__Bacteroidales	f__Balneicellaceae	g__Balneicella	s__Balneicella_halophila	0	0	0	27	0	0	0	0	0	0	0	0	0	0	0	0	0	0	0	0
k__Bacteria	p__Bacteroidetes	c__Bacteroidia	o__Bacteroidales	f__Barnesiellaceae	g__Barnesiella	s__Barnesiella_intestinihominis	6	0	0	0	0	0	0	0	0	7	0	0	0	0	0	0	0	0	0	0
k__Bacteria	p__Bacteroidetes	c__Bacteroidia	o__Bacteroidales	f__Barnesiellaceae	g__Barnesiella	s__Barnesiella_sp._An22	20	0	0	16	0	0	0	0	5	4	0	0	0	0	0	0	0	0	0	0
k__Bacteria	p__Bacteroidetes	c__Bacteroidia	o__Bacteroidales	f__Barnesiellaceae	g__Barnesiella	s__Barnesiella_sp._An55	0	0	0	8	0	0	0	0	0	0	0	0	0	0	0	0	0	0	0	0
k__Bacteria	p__Bacteroidetes	c__Bacteroidia	o__Bacteroidales	f__Barnesiellaceae	g__Barnesiella	s__Barnesiella_viscericola	0	44	0	27	0	0	0	0	0	0	0	0	0	0	0	0	0	0	0	0
k__Bacteria	p__Bacteroidetes	c__Bacteroidia	o__Bacteroidales	f__Barnesiellaceae	g__Coprobacter	s__Coprobacter_fastidiosus	0	0	0	0	0	0	0	0	0	6	0	0	0	0	0	0	0	0	0	0
k__Bacteria	p__Bacteroidetes	c__Bacteroidia	o__Bacteroidales	f__Barnesiellaceae	g__Coprobacter	s__Coprobacter_secundus	0	0	0	13	0	0	0	0	0	0	0	0	0	0	0	0	0	0	0	0
k__Bacteria	p__Bacteroidetes	c__Bacteroidia	o__Bacteroidales	f__Barnesiellaceae	g__Coprobacter	s__Coprobacter_sp.	3	5	0	31	0	0	0	0	0	0	0	0	0	0	0	0	0	0	0	0
k__Bacteria	p__Bacteroidetes	c__Bacteroidia	o__Bacteroidales	f__Dysgonomonadaceae	g__Dysgonomonas	s__Dysgonomonas_capnocytophagoides	0	12	0	90	0	0	0	0	0	0	0	0	0	0	0	0	0	0	0	0
k__Bacteria	p__Bacteroidetes	c__Bacteroidia	o__Bacteroidales	f__Dysgonomonadaceae	g__Dysgonomonas	s__Dysgonomonas_gadei	0	0	0	0	0	0	0	0	0	6	0	0	0	0	0	0	0	0	0	0
k__Bacteria	p__Bacteroidetes	c__Bacteroidia	o__Bacteroidales	f__Dysgonomonadaceae	g__Dysgonomonas	s__Dysgonomonas_macrotermitis	0	37	0	81	0	0	0	0	0	4	0	0	0	0	0	0	0	0	0	0
k__Bacteria	p__Bacteroidetes	c__Bacteroidia	o__Bacteroidales	f__Dysgonomonadaceae	g__Dysgonomonas	s__Dysgonomonas_massiliensis	0	0	0	32	0	0	0	0	0	0	0	0	0	0	0	0	0	0	0	0
k__Bacteria	p__Bacteroidetes	c__Bacteroidia	o__Bacteroidales	f__Dysgonomonadaceae	g__Dysgonomonas	s__Dysgonomonas_mossii	0	37	0	0	0	0	0	0	0	0	0	0	0	0	0	0	0	0	0	0
k__Bacteria	p__Bacteroidetes	c__Bacteroidia	o__Bacteroidales	f__Dysgonomonadaceae	g__Dysgonomonas	s__Dysgonomonas_sp._37_18	0	0	0	0	0	0	0	0	0	0	0	0	0	0	0	0	0	0	0	0
k__Bacteria	p__Bacteroidetes	c__Bacteroidia	o__Bacteroidales	f__Dysgonomonadaceae	g__Dysgonomonas	s__Dysgonomonas_sp._BGC7	0	0	0	0	0	0	0	0	0	34	0	0	0	0	0	0	0	0	0	0
k__Bacteria	p__Bacteroidetes	c__Bacteroidia	o__Bacteroidales	f__Dysgonomonadaceae	g__Dysgonomonas	s__Dysgonomonas_sp._HGC4	0	0	0	0	0	0	9	0	0	0	0	0	0	0	0	0	0	0	0	0
k__Bacteria	p__Bacteroidetes	c__Bacteroidia	o__Bacteroidales	f__Dysgonomonadaceae	g__Dysgonomonas	s__Unclassified	0	14	0	19	0	0	0	0	0	0	0	0	0	0	0	0	0	0	0	0
k__Bacteria	p__Bacteroidetes	c__Bacteroidia	o__Bacteroidales	f__Dysgonomonadaceae	g__Dysgonomonas	s__uncultured_Dysgonomonas_sp.	0	0	0	9	0	0	0	0	0	0	0	0	0	0	0	0	0	0	0	0
k__Bacteria	p__Bacteroidetes	c__Bacteroidia	o__Bacteroidales	f__Dysgonomonadaceae	g__Fermentimonas	s__Fermentimonas_caenicola	0	0	0	8	0	0	0	0	0	0	0	0	0	0	0	0	0	0	0	0
k__Bacteria	p__Bacteroidetes	c__Bacteroidia	o__Bacteroidales	f__Dysgonomonadaceae	g__Petrimonas	s__Petrimonas_mucosa	4	0	0	0	0	0	0	0	0	150	0	0	0	0	0	0	0	0	0	0
k__Bacteria	p__Bacteroidetes	c__Bacteroidia	o__Bacteroidales	f__Dysgonomonadaceae	g__Petrimonas	s__Petrimonas_sp._IBARAKI	7	0	0	36	0	0	0	0	0	0	0	0	0	0	0	0	0	0	0	0
k__Bacteria	p__Bacteroidetes	c__Bacteroidia	o__Bacteroidales	f__Dysgonomonadaceae	g__Proteiniphilum	s__Proteiniphilum_acetatigenes	4	39	0	26	0	0	0	0	0	3	0	0	0	0	0	0	0	0	0	0
k__Bacteria	p__Bacteroidetes	c__Bacteroidia	o__Bacteroidales	f__Dysgonomonadaceae	g__Proteiniphilum	s__Proteiniphilum_saccharofermentans	0	0	0	42	0	0	0	0	0	0	0	0	0	0	0	0	0	0	0	0
k__Bacteria	p__Bacteroidetes	c__Bacteroidia	o__Bacteroidales	f__Dysgonomonadaceae	g__Proteiniphilum	s__Proteiniphilum_sp._51_7	0	0	0	131	0	0	0	0	0	0	0	0	0	0	0	0	0	0	0	0
k__Bacteria	p__Bacteroidetes	c__Bacteroidia	o__Bacteroidales	f__Dysgonomonadaceae	g__Proteiniphilum	s__Proteiniphilum_sp._X52	0	3	0	62	0	0	12	0	0	15	0	0	0	0	0	0	0	0	0	0
k__Bacteria	p__Bacteroidetes	c__Bacteroidia	o__Bacteroidales	f__Dysgonomonadaceae	g__Unclassified	s__Dysgonamonadaceae_bacterium	0	0	0	18	0	0	0	0	0	0	0	0	0	0	0	0	0	0	0	0
k__Bacteria	p__Bacteroidetes	c__Bacteroidia	o__Bacteroidales	f__Lentimicrobiaceae	g__Lentimicrobium	s__Lentimicrobium_saccharophilum	0	0	0	14	0	0	0	0	0	0	0	0	0	0	0	0	0	0	0	0
k__Bacteria	p__Bacteroidetes	c__Bacteroidia	o__Bacteroidales	f__Muribaculaceae	g__Candidatus_Amulumruptor	s__Candidatus_Amulumruptor_caecigallinarius	5	0	0	28	0	0	0	0	0	0	0	0	0	0	0	0	0	0	0	0
k__Bacteria	p__Bacteroidetes	c__Bacteroidia	o__Bacteroidales	f__Muribaculaceae	g__Duncaniella	s__Duncaniella_muris	0	0	0	0	0	0	0	0	5	5	0	0	0	0	0	0	0	0	0	0
k__Bacteria	p__Bacteroidetes	c__Bacteroidia	o__Bacteroidales	f__Muribaculaceae	g__Muribaculum	s__Unclassified	0	0	0	6	0	0	0	0	0	0	0	0	0	0	0	0	0	0	0	0
k__Bacteria	p__Bacteroidetes	c__Bacteroidia	o__Bacteroidales	f__Muribaculaceae	g__Paramuribaculum	s__Paramuribaculum_intestinale	0	0	4	6	0	0	0	0	4	0	0	0	0	0	0	0	0	0	0	0
k__Bacteria	p__Bacteroidetes	c__Bacteroidia	o__Bacteroidales	f__Muribaculaceae	g__Unclassified	s__Muribaculaceae_bacterium_Isolate_002__NCI_	0	20	0	40	0	0	5	0	0	0	0	0	0	0	0	0	0	0	0	0
k__Bacteria	p__Bacteroidetes	c__Bacteroidia	o__Bacteroidales	f__Muribaculaceae	g__Unclassified	s__Muribaculaceae_bacterium_Isolate_013__NCI_	12	46	0	9	0	0	0	0	0	7	0	0	0	0	0	0	0	0	0	0
k__Bacteria	p__Bacteroidetes	c__Bacteroidia	o__Bacteroidales	f__Muribaculaceae	g__Unclassified	s__Muribaculaceae_bacterium_Isolate_036__Harlan_	14	35	0	13	0	0	0	0	11	21	0	0	0	0	0	0	0	0	0	0
k__Bacteria	p__Bacteroidetes	c__Bacteroidia	o__Bacteroidales	f__Muribaculaceae	g__Unclassified	s__Muribaculaceae_bacterium_Isolate_037__Harlan_	8	4	0	33	0	0	2	0	0	17	0	0	0	0	0	0	0	0	0	0
k__Bacteria	p__Bacteroidetes	c__Bacteroidia	o__Bacteroidales	f__Muribaculaceae	g__Unclassified	s__Muribaculaceae_bacterium_Isolate_039__Harlan_	0	0	0	0	0	0	5	0	0	0	0	0	0	0	0	0	0	0	0	0
k__Bacteria	p__Bacteroidetes	c__Bacteroidia	o__Bacteroidales	f__Muribaculaceae	g__Unclassified	s__Muribaculaceae_bacterium_Isolate_042__Harlan_	4	0	0	0	0	0	0	0	0	0	0	0	0	0	0	0	0	0	0	0
k__Bacteria	p__Bacteroidetes	c__Bacteroidia	o__Bacteroidales	f__Muribaculaceae	g__Unclassified	s__Muribaculaceae_bacterium_Isolate_080__Janvier_	0	22	0	16	0	0	5	0	0	6	0	0	0	0	0	0	0	0	0	0
k__Bacteria	p__Bacteroidetes	c__Bacteroidia	o__Bacteroidales	f__Muribaculaceae	g__Unclassified	s__Muribaculaceae_bacterium_Isolate_100__HZI_	0	0	0	0	0	0	0	0	0	48	0	0	0	0	0	0	0	0	0	0
k__Bacteria	p__Bacteroidetes	c__Bacteroidia	o__Bacteroidales	f__Muribaculaceae	g__Unclassified	s__Muribaculaceae_bacterium_Isolate_102__HZI_	7	0	0	48	0	0	0	0	0	0	0	0	0	0	0	0	0	0	0	0
k__Bacteria	p__Bacteroidetes	c__Bacteroidia	o__Bacteroidales	f__Muribaculaceae	g__Unclassified	s__Muribaculaceae_bacterium_Isolate_104__HZI_	10	78	0	7	0	0	0	0	0	6	0	0	0	0	0	0	0	0	0	0
k__Bacteria	p__Bacteroidetes	c__Bacteroidia	o__Bacteroidales	f__Muribaculaceae	g__Unclassified	s__Muribaculaceae_bacterium_Isolate_105__HZI_	3	0	0	9	0	0	0	0	0	0	0	0	0	0	0	0	0	0	0	0
k__Bacteria	p__Bacteroidetes	c__Bacteroidia	o__Bacteroidales	f__Muribaculaceae	g__Unclassified	s__Muribaculaceae_bacterium_Isolate_110__HZI_	19	0	9	14	0	0	0	0	0	0	0	0	0	0	0	0	0	0	0	0
k__Bacteria	p__Bacteroidetes	c__Bacteroidia	o__Bacteroidales	f__Muribaculaceae	g__Unclassified	s__Muribaculaceae_bacterium_Isolate_114__HZI_	0	0	0	0	0	0	0	0	3	0	0	0	0	0	0	0	0	0	0	0
k__Bacteria	p__Bacteroidetes	c__Bacteroidia	o__Bacteroidales	f__Muribaculaceae	g__Unclassified	s__Unclassified	0	16	6	4	0	0	7	0	0	22	0	0	0	0	0	0	0	0	0	0
k__Bacteria	p__Bacteroidetes	c__Bacteroidia	o__Bacteroidales	f__Odoribacteraceae	g__Butyricimonas	s__Butyricimonas_faecalis	0	8	0	24	0	0	3	0	0	0	0	0	0	0	0	0	0	0	0	0
k__Bacteria	p__Bacteroidetes	c__Bacteroidia	o__Bacteroidales	f__Odoribacteraceae	g__Butyricimonas	s__Butyricimonas_faecihominis	4	0	0	0	0	0	0	0	0	8	0	0	0	0	0	0	0	0	0	0
k__Bacteria	p__Bacteroidetes	c__Bacteroidia	o__Bacteroidales	f__Odoribacteraceae	g__Butyricimonas	s__Butyricimonas_sp._An62	0	0	0	4	0	0	0	0	0	0	0	0	0	0	0	0	0	0	0	0
k__Bacteria	p__Bacteroidetes	c__Bacteroidia	o__Bacteroidales	f__Odoribacteraceae	g__Butyricimonas	s__Butyricimonas_sp._Marseille_P2440	0	0	0	14	0	0	4	0	0	6	0	0	0	0	0	0	0	0	0	0
k__Bacteria	p__Bacteroidetes	c__Bacteroidia	o__Bacteroidales	f__Odoribacteraceae	g__Butyricimonas	s__Butyricimonas_sp._Marseille_P3923	0	0	5	25	0	0	0	0	0	4	0	0	0	0	0	0	0	0	0	0
k__Bacteria	p__Bacteroidetes	c__Bacteroidia	o__Bacteroidales	f__Odoribacteraceae	g__Butyricimonas	s__Butyricimonas_synergistica	0	0	0	12	0	0	0	0	0	0	0	0	0	0	0	0	0	0	0	0
k__Bacteria	p__Bacteroidetes	c__Bacteroidia	o__Bacteroidales	f__Odoribacteraceae	g__Butyricimonas	s__Butyricimonas_virosa	0	3	0	19	0	0	0	0	0	18	0	0	0	0	0	0	0	0	0	0
k__Bacteria	p__Bacteroidetes	c__Bacteroidia	o__Bacteroidales	f__Odoribacteraceae	g__Butyricimonas	s__Unclassified	0	0	0	30	0	0	0	0	4	0	0	0	0	0	0	4	0	0	0	0
k__Bacteria	p__Bacteroidetes	c__Bacteroidia	o__Bacteroidales	f__Odoribacteraceae	g__Culturomica	s__Culturomica_massiliensis	0	0	0	0	0	0	0	0	6	0	0	0	0	0	0	0	0	0	0	0
k__Bacteria	p__Bacteroidetes	c__Bacteroidia	o__Bacteroidales	f__Odoribacteraceae	g__Odoribacter	s__Odoribacter_laneus	0	3	0	42	0	0	0	0	0	0	0	0	0	0	0	0	0	0	0	0
k__Bacteria	p__Bacteroidetes	c__Bacteroidia	o__Bacteroidales	f__Odoribacteraceae	g__Odoribacter	s__Odoribacter_sp._AF15_53	0	0	0	9	0	0	0	0	3	0	0	0	0	0	0	0	0	0	0	0
k__Bacteria	p__Bacteroidetes	c__Bacteroidia	o__Bacteroidales	f__Odoribacteraceae	g__Odoribacter	s__Odoribacter_sp._OF09_27XD	0	40	0	80	0	0	0	0	0	0	0	0	0	0	0	0	0	0	0	0
k__Bacteria	p__Bacteroidetes	c__Bacteroidia	o__Bacteroidales	f__Odoribacteraceae	g__Odoribacter	s__Odoribacter_splanchnicus	34	41	7	76	0	2	12	0	9	17	0	0	0	0	0	0	0	0	0	0
k__Bacteria	p__Bacteroidetes	c__Bacteroidia	o__Bacteroidales	f__Paludibacteraceae	g__Paludibacter	s__Paludibacter_jiangxiensis	0	0	0	3	0	0	0	0	0	0	0	0	0	0	0	0	0	0	0	0
k__Bacteria	p__Bacteroidetes	c__Bacteroidia	o__Bacteroidales	f__Paludibacteraceae	g__Paludibacter	s__Paludibacter_propionicigenes	0	0	0	8	0	0	0	0	0	0	0	0	0	0	0	0	0	0	0	0
k__Bacteria	p__Bacteroidetes	c__Bacteroidia	o__Bacteroidales	f__Paludibacteraceae	g__Paludibacter	s__Paludibacter_sp._47_17	0	4	0	3	0	0	0	0	1	0	0	0	0	0	0	0	0	0	0	0
k__Bacteria	p__Bacteroidetes	c__Bacteroidia	o__Bacteroidales	f__Paludibacteraceae	g__Paludibacter	s__Paludibacter_sp._SCN_50_10	0	0	0	27	0	0	0	0	0	0	0	0	0	0	0	0	0	0	0	0
k__Bacteria	p__Bacteroidetes	c__Bacteroidia	o__Bacteroidales	f__Porphyromonadaceae	g__Gabonia	s__Gabonia_massiliensis	0	0	0	10	0	0	0	0	0	11	0	0	0	0	0	0	0	0	0	0
k__Bacteria	p__Bacteroidetes	c__Bacteroidia	o__Bacteroidales	f__Porphyromonadaceae	g__Lascolabacillus	s__Lascolabacillus_massiliensis	0	0	0	11	0	0	0	0	0	0	0	0	0	0	0	0	0	0	0	0
k__Bacteria	p__Bacteroidetes	c__Bacteroidia	o__Bacteroidales	f__Porphyromonadaceae	g__Massilibacteroides	s__Massilibacteroides_vaginae	0	0	0	27	0	0	0	0	0	0	0	0	0	0	0	0	0	0	0	0
k__Bacteria	p__Bacteroidetes	c__Bacteroidia	o__Bacteroidales	f__Porphyromonadaceae	g__Porphyromonas	s__Porphyromonas_asaccharolytica	27	103	4	298	0	0	21	0	16	21	0	0	0	0	0	0	0	0	0	0
k__Bacteria	p__Bacteroidetes	c__Bacteroidia	o__Bacteroidales	f__Porphyromonadaceae	g__Porphyromonas	s__Porphyromonas_bennonis	0	12	0	30	0	5	0	0	0	184	0	0	0	0	0	0	0	0	0	0
k__Bacteria	p__Bacteroidetes	c__Bacteroidia	o__Bacteroidales	f__Porphyromonadaceae	g__Porphyromonas	s__Porphyromonas_cangingivalis	23	9	0	40	0	26	294	0	12	10	0	0	0	0	0	0	0	0	0	0
k__Bacteria	p__Bacteroidetes	c__Bacteroidia	o__Bacteroidales	f__Porphyromonadaceae	g__Porphyromonas	s__Porphyromonas_canoris	53	6	6	237	0	0	8	0	24	33	0	0	0	0	0	0	0	0	0	0
k__Bacteria	p__Bacteroidetes	c__Bacteroidia	o__Bacteroidales	f__Porphyromonadaceae	g__Porphyromonas	s__Porphyromonas_catoniae	1241	573	399	4238	0	0	137	7	263	1330	0	0	0	0	0	0	0	0	0	0
k__Bacteria	p__Bacteroidetes	c__Bacteroidia	o__Bacteroidales	f__Porphyromonadaceae	g__Porphyromonas	s__Porphyromonas_circumdentaria	20	15	3	213	0	0	7	0	0	0	0	0	0	0	0	0	0	0	0	0
k__Bacteria	p__Bacteroidetes	c__Bacteroidia	o__Bacteroidales	f__Porphyromonadaceae	g__Porphyromonas	s__Porphyromonas_crevioricanis	43	102	0	188	0	0	7	0	0	20	0	0	0	0	0	0	0	0	0	0
k__Bacteria	p__Bacteroidetes	c__Bacteroidia	o__Bacteroidales	f__Porphyromonadaceae	g__Porphyromonas	s__Porphyromonas_endodontalis	51	7274	74	22059	0	0	2732	0	311	114	0	0	0	0	0	0	0	0	0	0
k__Bacteria	p__Bacteroidetes	c__Bacteroidia	o__Bacteroidales	f__Porphyromonadaceae	g__Porphyromonas	s__Porphyromonas_gingivalis	533	698	123	2222	0	28	1314	0	116	385	0	0	0	0	0	0	0	0	0	0
k__Bacteria	p__Bacteroidetes	c__Bacteroidia	o__Bacteroidales	f__Porphyromonadaceae	g__Porphyromonas	s__Porphyromonas_gingivicanis	15	45	4	319	0	0	35	0	6	11	0	0	0	0	0	0	0	0	0	0
k__Bacteria	p__Bacteroidetes	c__Bacteroidia	o__Bacteroidales	f__Porphyromonadaceae	g__Porphyromonas	s__Porphyromonas_gulae	65	223	5	227	0	0	14	0	28	263	0	0	0	0	0	0	0	0	0	0
k__Bacteria	p__Bacteroidetes	c__Bacteroidia	o__Bacteroidales	f__Porphyromonadaceae	g__Porphyromonas	s__Porphyromonas_levii	170	57	0	84	0	0	0	0	0	114	0	0	0	0	0	0	0	0	0	0
k__Bacteria	p__Bacteroidetes	c__Bacteroidia	o__Bacteroidales	f__Porphyromonadaceae	g__Porphyromonas	s__Porphyromonas_loveana	0	102	5	71	0	0	10	0	0	26	0	0	0	0	0	0	0	0	0	0
k__Bacteria	p__Bacteroidetes	c__Bacteroidia	o__Bacteroidales	f__Porphyromonadaceae	g__Porphyromonas	s__Porphyromonas_macacae	9	108	0	412	0	0	7	0	13	17	0	0	0	0	0	0	0	0	0	0
k__Bacteria	p__Bacteroidetes	c__Bacteroidia	o__Bacteroidales	f__Porphyromonadaceae	g__Porphyromonas	s__Porphyromonas_somerae	7078	690	380	2746	0	6	148	6	1011	2997	0	0	0	0	0	0	0	0	0	0
k__Bacteria	p__Bacteroidetes	c__Bacteroidia	o__Bacteroidales	f__Porphyromonadaceae	g__Porphyromonas	s__Porphyromonas_sp.	3226	354	570	1021	0	82	54	0	188	331	0	0	0	0	0	0	0	0	0	0
k__Bacteria	p__Bacteroidetes	c__Bacteroidia	o__Bacteroidales	f__Porphyromonadaceae	g__Porphyromonas	s__Porphyromonas_sp._CAG_1061	0	123	0	15	0	0	4	0	3	70	0	0	0	0	0	0	0	0	0	0
k__Bacteria	p__Bacteroidetes	c__Bacteroidia	o__Bacteroidales	f__Porphyromonadaceae	g__Porphyromonas	s__Porphyromonas_sp._COT_052_OH4946	0	0	0	27	0	0	0	0	0	0	0	0	0	0	0	0	0	0	0	0
k__Bacteria	p__Bacteroidetes	c__Bacteroidia	o__Bacteroidales	f__Porphyromonadaceae	g__Porphyromonas	s__Porphyromonas_sp._COT_108_OH1349	15	88	6	94	0	0	0	0	17	35	0	0	0	0	0	0	0	0	0	0
k__Bacteria	p__Bacteroidetes	c__Bacteroidia	o__Bacteroidales	f__Porphyromonadaceae	g__Porphyromonas	s__Porphyromonas_sp._COT_108_OH2963	0	0	0	42	0	0	0	0	0	0	0	0	0	0	0	0	0	0	0	0
k__Bacteria	p__Bacteroidetes	c__Bacteroidia	o__Bacteroidales	f__Porphyromonadaceae	g__Porphyromonas	s__Porphyromonas_sp._COT_239_OH1446	187	20	17	112	0	0	7	0	18	66	0	0	0	0	0	0	0	0	0	0
k__Bacteria	p__Bacteroidetes	c__Bacteroidia	o__Bacteroidales	f__Porphyromonadaceae	g__Porphyromonas	s__Porphyromonas_sp._COT_290_OH3588	10	0	11	22	0	0	0	0	0	25	0	0	0	0	0	0	0	0	0	0
k__Bacteria	p__Bacteroidetes	c__Bacteroidia	o__Bacteroidales	f__Porphyromonadaceae	g__Porphyromonas	s__Porphyromonas_sp._COT_290_OH860	165	66	3	126	0	0	4	0	10	24	0	0	0	0	0	0	0	0	0	0
k__Bacteria	p__Bacteroidetes	c__Bacteroidia	o__Bacteroidales	f__Porphyromonadaceae	g__Porphyromonas	s__Porphyromonas_sp._HMSC065F10	14	12	0	12	0	0	4	0	8	11	0	0	0	0	0	0	0	0	0	0
k__Bacteria	p__Bacteroidetes	c__Bacteroidia	o__Bacteroidales	f__Porphyromonadaceae	g__Porphyromonas	s__Porphyromonas_sp._HMSC077F02	11	34	0	71	0	0	0	0	0	5	0	0	0	0	0	0	0	0	0	0
k__Bacteria	p__Bacteroidetes	c__Bacteroidia	o__Bacteroidales	f__Porphyromonadaceae	g__Porphyromonas	s__Porphyromonas_sp._KLE_1280	10770	2236	1000	4605	0	1	632	12	2048	4911	0	0	0	0	0	0	0	0	0	0
k__Bacteria	p__Bacteroidetes	c__Bacteroidia	o__Bacteroidales	f__Porphyromonadaceae	g__Porphyromonas	s__Porphyromonas_sp._oral_taxon_278	1191	297	94	591	0	0	108	2	169	423	0	0	0	0	0	0	0	0	0	0
k__Bacteria	p__Bacteroidetes	c__Bacteroidia	o__Bacteroidales	f__Porphyromonadaceae	g__Porphyromonas	s__Porphyromonas_sp._oral_taxon_279	46699	11978	4045	22020	0	20	2392	55	8854	21968	0	0	0	0	0	0	0	0	0	0
k__Bacteria	p__Bacteroidetes	c__Bacteroidia	o__Bacteroidales	f__Porphyromonadaceae	g__Porphyromonas	s__Porphyromonas_uenonis	28	63	7	448	0	0	7	0	0	80	0	0	0	0	0	0	0	0	0	0
k__Bacteria	p__Bacteroidetes	c__Bacteroidia	o__Bacteroidales	f__Porphyromonadaceae	g__Porphyromonas	s__Unclassified	14019	3793	1137	7182	0	0	1068	14	2612	6051	0	0	0	0	0	0	0	0	0	0
k__Bacteria	p__Bacteroidetes	c__Bacteroidia	o__Bacteroidales	f__Porphyromonadaceae	g__Sanguibacteroides	s__Sanguibacteroides_justesenii	90	73	9	31	0	416	0	88	35	0	0	138	0	0	0	88	226	0	149	0
k__Bacteria	p__Bacteroidetes	c__Bacteroidia	o__Bacteroidales	f__Porphyromonadaceae	g__Unclassified	s__Porphyromonadaceae_bacterium_CG2_30_38_12	0	0	0	0	0	0	0	0	0	0	0	0	0	0	0	0	0	0	0	0
k__Bacteria	p__Bacteroidetes	c__Bacteroidia	o__Bacteroidales	f__Porphyromonadaceae	g__Unclassified	s__Porphyromonadaceae_bacterium_COT_184_OH4590	89	144	0	19	0	0	10	3	26	7	0	0	0	0	0	0	0	0	0	0
k__Bacteria	p__Bacteroidetes	c__Bacteroidia	o__Bacteroidales	f__Porphyromonadaceae	g__Unclassified	s__Porphyromonadaceae_bacterium_FC4	0	5	0	8	0	0	0	0	0	0	0	0	0	0	0	0	0	0	0	0
k__Bacteria	p__Bacteroidetes	c__Bacteroidia	o__Bacteroidales	f__Porphyromonadaceae	g__Unclassified	s__Porphyromonadaceae_bacterium_H1	21	0	0	230	0	0	25	0	0	0	0	0	0	0	0	0	0	0	0	0
k__Bacteria	p__Bacteroidetes	c__Bacteroidia	o__Bacteroidales	f__Porphyromonadaceae	g__Unclassified	s__Porphyromonadaceae_bacterium_KA00676	2582	411	206	1291	0	0	82	3	371	1266	0	0	0	0	0	0	0	0	0	0
k__Bacteria	p__Bacteroidetes	c__Bacteroidia	o__Bacteroidales	f__Porphyromonadaceae	g__Unclassified	s__Porphyromonadaceae_bacterium_KHP3R9	0	0	0	22	0	0	0	0	0	0	0	0	0	0	0	0	0	0	0	0
k__Bacteria	p__Bacteroidetes	c__Bacteroidia	o__Bacteroidales	f__Porphyromonadaceae	g__Unclassified	s__Unclassified	420	32	62	164	0	0	75	0	82	238	0	0	0	0	0	0	0	0	0	0
k__Bacteria	p__Bacteroidetes	c__Bacteroidia	o__Bacteroidales	f__Prevotellaceae	g__Alloprevotella	s__Alloprevotella_rava	114	206	14	156	0	209	963	0	49	3068	0	0	0	0	0	0	0	0	0	0
k__Bacteria	p__Bacteroidetes	c__Bacteroidia	o__Bacteroidales	f__Prevotellaceae	g__Alloprevotella	s__Alloprevotella_sp.	12732	20305	5000	5838	0	32	808	3	2521	5805	0	0	0	0	0	0	0	0	0	0
k__Bacteria	p__Bacteroidetes	c__Bacteroidia	o__Bacteroidales	f__Prevotellaceae	g__Alloprevotella	s__Alloprevotella_sp._OH1205_COT_284	2105	7497	120	1931	0	3	84	0	1130	2074	0	0	0	0	0	0	0	0	0	0
k__Bacteria	p__Bacteroidetes	c__Bacteroidia	o__Bacteroidales	f__Prevotellaceae	g__Alloprevotella	s__Alloprevotella_sp._oral_taxon_473	10007	18007	4267	4686	0	25	921	0	2320	5171	0	0	0	0	0	0	0	0	0	0
k__Bacteria	p__Bacteroidetes	c__Bacteroidia	o__Bacteroidales	f__Prevotellaceae	g__Alloprevotella	s__Alloprevotella_tannerae	375	426	225	24128	0	20	14827	5	97	179	0	0	0	0	0	0	0	0	0	0
k__Bacteria	p__Bacteroidetes	c__Bacteroidia	o__Bacteroidales	f__Prevotellaceae	g__Alloprevotella	s__Unclassified	5187	8727	992	3398	0	110	466	0	1911	3507	0	0	0	0	0	0	0	0	0	0
k__Bacteria	p__Bacteroidetes	c__Bacteroidia	o__Bacteroidales	f__Prevotellaceae	g__Hallella	s__Hallella_seregens	4	50	0	28	0	0	0	0	0	110	0	0	0	0	0	0	0	0	0	0
k__Bacteria	p__Bacteroidetes	c__Bacteroidia	o__Bacteroidales	f__Prevotellaceae	g__Metaprevotella	s__Metaprevotella_massiliensis	0	37	0	4	0	0	0	0	4	10	0	0	0	0	0	0	0	0	0	0
k__Bacteria	p__Bacteroidetes	c__Bacteroidia	o__Bacteroidales	f__Prevotellaceae	g__Paraprevotella	s__Paraprevotella_clara	7	132	0	69	0	0	113	0	0	59	0	0	0	0	0	0	0	0	0	0
k__Bacteria	p__Bacteroidetes	c__Bacteroidia	o__Bacteroidales	f__Prevotellaceae	g__Paraprevotella	s__Paraprevotella_clara_CAG_116	0	14	3	7	0	0	3	0	0	0	0	0	0	0	0	0	0	0	0	0
k__Bacteria	p__Bacteroidetes	c__Bacteroidia	o__Bacteroidales	f__Prevotellaceae	g__Paraprevotella	s__Paraprevotella_xylaniphila	7	44	4	57	0	0	50	0	5	75	0	0	0	0	0	0	0	0	0	0
k__Bacteria	p__Bacteroidetes	c__Bacteroidia	o__Bacteroidales	f__Prevotellaceae	g__Paraprevotella	s__Unclassified	5	48	0	17	0	0	0	0	5	5	0	0	0	0	0	0	0	0	0	0
k__Bacteria	p__Bacteroidetes	c__Bacteroidia	o__Bacteroidales	f__Prevotellaceae	g__Prevotella	s__Prevotella_aff._ruminicola_Tc2_24	0	0	0	30	0	0	9	0	0	0	0	0	0	0	0	0	0	0	0	0
k__Bacteria	p__Bacteroidetes	c__Bacteroidia	o__Bacteroidales	f__Prevotellaceae	g__Prevotella	s__Prevotella_albensis	7	102	0	56	0	0	3	0	0	75	0	0	0	0	0	0	0	0	0	0
k__Bacteria	p__Bacteroidetes	c__Bacteroidia	o__Bacteroidales	f__Prevotellaceae	g__Prevotella	s__Prevotella_amnii	538	1067	42	910	0	101	642	0	22	1143	0	0	0	0	0	0	0	0	0	0
k__Bacteria	p__Bacteroidetes	c__Bacteroidia	o__Bacteroidales	f__Prevotellaceae	g__Prevotella	s__Prevotella_aurantiaca	1264	2034	122	23296	0	51	517	1	8852	1521	0	0	0	0	0	0	0	0	0	0
k__Bacteria	p__Bacteroidetes	c__Bacteroidia	o__Bacteroidales	f__Prevotellaceae	g__Prevotella	s__Prevotella_baroniae	182	719	3	7678	0	4	375	0	16	297	0	0	0	0	0	0	0	0	0	0
k__Bacteria	p__Bacteroidetes	c__Bacteroidia	o__Bacteroidales	f__Prevotellaceae	g__Prevotella	s__Prevotella_bergensis	131	979	29	506	0	0	53	0	42	477	0	0	0	0	0	0	0	0	0	0
k__Bacteria	p__Bacteroidetes	c__Bacteroidia	o__Bacteroidales	f__Prevotellaceae	g__Prevotella	s__Prevotella_bivia	612	1972	42	644	0	43	179	0	39	1842	0	0	0	0	0	0	0	0	0	0
k__Bacteria	p__Bacteroidetes	c__Bacteroidia	o__Bacteroidales	f__Prevotellaceae	g__Prevotella	s__Prevotella_brevis	38	5	4	88	0	0	6	0	8	46	0	0	0	0	0	0	0	0	0	0
k__Bacteria	p__Bacteroidetes	c__Bacteroidia	o__Bacteroidales	f__Prevotellaceae	g__Prevotella	s__Prevotella_bryantii	154	742	12	191	0	0	33	0	32	494	0	0	0	0	0	0	0	0	0	0
k__Bacteria	p__Bacteroidetes	c__Bacteroidia	o__Bacteroidales	f__Prevotellaceae	g__Prevotella	s__Prevotella_buccae	148	529	0	667	0	84	90	0	18	261	0	0	0	0	0	0	0	0	0	0
k__Bacteria	p__Bacteroidetes	c__Bacteroidia	o__Bacteroidales	f__Prevotellaceae	g__Prevotella	s__Prevotella_buccalis	162	1012	14	408	0	0	139	0	48	667	0	0	0	0	0	0	0	4	0	0
k__Bacteria	p__Bacteroidetes	c__Bacteroidia	o__Bacteroidales	f__Prevotellaceae	g__Prevotella	s__Prevotella_colorans	89	410	9	146	0	5	55	0	10	211	0	0	0	0	0	0	0	0	0	0
k__Bacteria	p__Bacteroidetes	c__Bacteroidia	o__Bacteroidales	f__Prevotellaceae	g__Prevotella	s__Prevotella_conceptionensis	193	190	29	813	0	3	319	0	34	445	0	0	0	0	0	0	0	0	0	0
k__Bacteria	p__Bacteroidetes	c__Bacteroidia	o__Bacteroidales	f__Prevotellaceae	g__Prevotella	s__Prevotella_copri	254	415	59	434	0	5	59	0	92	347	0	0	0	0	0	0	0	0	0	0
k__Bacteria	p__Bacteroidetes	c__Bacteroidia	o__Bacteroidales	f__Prevotellaceae	g__Prevotella	s__Prevotella_copri_CAG_164	0	0	13	4	0	0	0	0	0	0	0	0	0	0	0	0	0	0	0	0
k__Bacteria	p__Bacteroidetes	c__Bacteroidia	o__Bacteroidales	f__Prevotellaceae	g__Prevotella	s__Prevotella_corporis	39	321	0	166	0	5	91	0	111	289	0	0	0	0	0	0	0	0	0	0
k__Bacteria	p__Bacteroidetes	c__Bacteroidia	o__Bacteroidales	f__Prevotellaceae	g__Prevotella	s__Prevotella_dentalis	22	1081	0	846	0	9	20	0	8	237	0	0	0	0	0	0	0	0	0	0
k__Bacteria	p__Bacteroidetes	c__Bacteroidia	o__Bacteroidales	f__Prevotellaceae	g__Prevotella	s__Prevotella_dentasini	162	1154	30	328	0	4	70	0	33	319	0	0	0	0	0	0	0	0	0	0
k__Bacteria	p__Bacteroidetes	c__Bacteroidia	o__Bacteroidales	f__Prevotellaceae	g__Prevotella	s__Prevotella_denticola	1224	5003	142	12124	0	64	448	0	324	2284	0	0	0	0	0	0	0	0	0	0
k__Bacteria	p__Bacteroidetes	c__Bacteroidia	o__Bacteroidales	f__Prevotellaceae	g__Prevotella	s__Prevotella_disiens	699	3470	279	1628	0	62	608	0	448	3095	0	0	0	0	0	0	0	0	0	0
k__Bacteria	p__Bacteroidetes	c__Bacteroidia	o__Bacteroidales	f__Prevotellaceae	g__Prevotella	s__Prevotella_enoeca	21	623	6	2983	0	0	52	0	4	205	0	0	0	0	0	0	0	0	0	0
k__Bacteria	p__Bacteroidetes	c__Bacteroidia	o__Bacteroidales	f__Prevotellaceae	g__Prevotella	s__Prevotella_falsenii	189	793	230	2289	0	6	342	31	513	405	0	0	0	0	0	0	0	0	0	0
k__Bacteria	p__Bacteroidetes	c__Bacteroidia	o__Bacteroidales	f__Prevotellaceae	g__Prevotella	s__Prevotella_fusca	4806	10332	325	4152	0	214	2692	2	920	3644	0	0	0	0	0	0	0	0	0	0
k__Bacteria	p__Bacteroidetes	c__Bacteroidia	o__Bacteroidales	f__Prevotellaceae	g__Prevotella	s__Prevotella_histicola	6980	108915	18	1159	0	412	942	0	321	31870	0	0	0	0	0	0	0	0	0	0
k__Bacteria	p__Bacteroidetes	c__Bacteroidia	o__Bacteroidales	f__Prevotellaceae	g__Prevotella	s__Prevotella_ihumii	130	319	4	203	0	15	119	0	21	178	0	0	0	0	0	0	0	0	0	0
k__Bacteria	p__Bacteroidetes	c__Bacteroidia	o__Bacteroidales	f__Prevotellaceae	g__Prevotella	s__Prevotella_intermedia	3583	7234	1177	11534	0	110	3652	3	1972	3592	0	0	0	0	0	0	0	0	0	0
k__Bacteria	p__Bacteroidetes	c__Bacteroidia	o__Bacteroidales	f__Prevotellaceae	g__Prevotella	s__Prevotella_jejuni	1856	43446	206	2250	0	2199	1253	0	306	13383	0	0	0	0	0	0	0	0	0	0
k__Bacteria	p__Bacteroidetes	c__Bacteroidia	o__Bacteroidales	f__Prevotellaceae	g__Prevotella	s__Prevotella_koreensis	195	123	0	467	0	11	52	0	103	220	0	0	0	0	0	0	0	0	0	0
k__Bacteria	p__Bacteroidetes	c__Bacteroidia	o__Bacteroidales	f__Prevotellaceae	g__Prevotella	s__Prevotella_lascolaii	140	98	3	33	0	0	84	0	0	0	0	0	0	0	0	0	0	0	0	0
k__Bacteria	p__Bacteroidetes	c__Bacteroidia	o__Bacteroidales	f__Prevotellaceae	g__Prevotella	s__Prevotella_loescheii	947	319	89	1929	0	11	743	3	38	907	0	0	0	0	0	0	0	0	0	0
k__Bacteria	p__Bacteroidetes	c__Bacteroidia	o__Bacteroidales	f__Prevotellaceae	g__Prevotella	s__Prevotella_maculosa	259	1914	27	1032	0	19	957	0	103	2017	0	0	0	0	0	0	0	0	0	0
k__Bacteria	p__Bacteroidetes	c__Bacteroidia	o__Bacteroidales	f__Prevotellaceae	g__Prevotella	s__Prevotella_marseillensis	27	10	0	3	0	0	0	0	5	32	0	0	0	0	0	0	0	0	0	0
k__Bacteria	p__Bacteroidetes	c__Bacteroidia	o__Bacteroidales	f__Prevotellaceae	g__Prevotella	s__Prevotella_marshii	141	465	9	523	0	12	158	0	32	253	0	0	0	0	0	0	0	0	0	0
k__Bacteria	p__Bacteroidetes	c__Bacteroidia	o__Bacteroidales	f__Prevotellaceae	g__Prevotella	s__Prevotella_melaninogenica	60828	87107	5088	39584	0	3589	29715	43	12721	32230	0	0	0	0	0	0	0	0	0	0
k__Bacteria	p__Bacteroidetes	c__Bacteroidia	o__Bacteroidales	f__Prevotellaceae	g__Prevotella	s__Prevotella_micans	60	573	4	227	0	9	149	0	3	319	0	0	0	0	0	0	0	0	0	0
k__Bacteria	p__Bacteroidetes	c__Bacteroidia	o__Bacteroidales	f__Prevotellaceae	g__Prevotella	s__Prevotella_multiformis	482	2087	82	1532	0	109	287	0	66	841	0	0	0	0	0	0	0	0	0	0
k__Bacteria	p__Bacteroidetes	c__Bacteroidia	o__Bacteroidales	f__Prevotellaceae	g__Prevotella	s__Prevotella_multisaccharivorax	133	1231	3	513	0	0	54	0	66	591	0	0	0	0	0	0	0	0	0	0
k__Bacteria	p__Bacteroidetes	c__Bacteroidia	o__Bacteroidales	f__Prevotellaceae	g__Prevotella	s__Prevotella_nanceiensis	26796	10395	527	7607	0	16	167	0	6745	10091	0	0	0	0	0	0	0	0	0	0
k__Bacteria	p__Bacteroidetes	c__Bacteroidia	o__Bacteroidales	f__Prevotellaceae	g__Prevotella	s__Prevotella_nigrescens	4034	12974	321	6366	0	568	2334	11	1460	13019	0	0	0	0	0	0	0	0	0	0
k__Bacteria	p__Bacteroidetes	c__Bacteroidia	o__Bacteroidales	f__Prevotellaceae	g__Prevotella	s__Prevotella_oralis	121	177	0	134	0	0	25	0	6	77	0	0	0	0	0	0	0	0	0	0
k__Bacteria	p__Bacteroidetes	c__Bacteroidia	o__Bacteroidales	f__Prevotellaceae	g__Prevotella	s__Prevotella_oris	770	4535	488	9667	0	226	1046	0	171	4475	0	0	0	0	0	0	0	0	0	0
k__Bacteria	p__Bacteroidetes	c__Bacteroidia	o__Bacteroidales	f__Prevotellaceae	g__Prevotella	s__Prevotella_oryzae	0	4	0	0	0	0	0	0	0	33	0	0	0	0	0	0	0	0	0	0
k__Bacteria	p__Bacteroidetes	c__Bacteroidia	o__Bacteroidales	f__Prevotellaceae	g__Prevotella	s__Prevotella_oulorum	288	6283	71	485	0	28	184	0	63	9370	0	0	0	0	0	0	0	0	0	0
k__Bacteria	p__Bacteroidetes	c__Bacteroidia	o__Bacteroidales	f__Prevotellaceae	g__Prevotella	s__Prevotella_pallens	21666	44379	138	7459	0	2145	11011	10	1227	71265	0	0	0	0	0	0	0	0	0	0
k__Bacteria	p__Bacteroidetes	c__Bacteroidia	o__Bacteroidales	f__Prevotellaceae	g__Prevotella	s__Prevotella_paludivivens	75	139	0	75	0	0	24	0	32	0	0	0	0	0	0	0	0	0	0	0
k__Bacteria	p__Bacteroidetes	c__Bacteroidia	o__Bacteroidales	f__Prevotellaceae	g__Prevotella	s__Prevotella_pectinovora	8	117	0	21	0	0	35	0	10	60	0	0	0	0	0	0	0	0	0	0
k__Bacteria	p__Bacteroidetes	c__Bacteroidia	o__Bacteroidales	f__Prevotellaceae	g__Prevotella	s__Prevotella_phocaeensis	0	14	0	11	0	0	0	0	0	0	0	0	0	0	0	0	0	0	0	0
k__Bacteria	p__Bacteroidetes	c__Bacteroidia	o__Bacteroidales	f__Prevotellaceae	g__Prevotella	s__Prevotella_pleuritidis	227	4005	42	34659	0	4	155	5	9	139	0	0	0	0	0	0	0	0	0	0
k__Bacteria	p__Bacteroidetes	c__Bacteroidia	o__Bacteroidales	f__Prevotellaceae	g__Prevotella	s__Prevotella_rara	11	100	0	13	0	0	5	0	7	11	0	0	0	0	0	0	0	0	0	0
k__Bacteria	p__Bacteroidetes	c__Bacteroidia	o__Bacteroidales	f__Prevotellaceae	g__Prevotella	s__Prevotella_ruminicola	38	334	0	55	0	0	10	0	20	212	0	0	0	0	0	0	0	0	0	0
k__Bacteria	p__Bacteroidetes	c__Bacteroidia	o__Bacteroidales	f__Prevotellaceae	g__Prevotella	s__Prevotella_saccharolytica	406	574	49	767	0	21	343	0	26	500	0	0	0	0	0	0	0	0	0	0
k__Bacteria	p__Bacteroidetes	c__Bacteroidia	o__Bacteroidales	f__Prevotellaceae	g__Prevotella	s__Prevotella_salivae	330	36578	133	18978	0	9	3123	0	50	43417	0	0	0	0	0	0	0	0	0	0
k__Bacteria	p__Bacteroidetes	c__Bacteroidia	o__Bacteroidales	f__Prevotellaceae	g__Prevotella	s__Prevotella_scopos	8402	6725	236	2544	0	313	1312	0	635	2328	0	0	0	0	0	0	0	0	0	0
k__Bacteria	p__Bacteroidetes	c__Bacteroidia	o__Bacteroidales	f__Prevotellaceae	g__Prevotella	s__Prevotella_shahii	10965	301	1179	29900	0	7	8105	26	302	10274	0	0	0	0	0	0	0	0	0	0
k__Bacteria	p__Bacteroidetes	c__Bacteroidia	o__Bacteroidales	f__Prevotellaceae	g__Prevotella	s__Prevotella_sp.	1247	3164	68	2091	0	65	554	2	245	4142	0	0	0	0	0	0	0	0	0	0
k__Bacteria	p__Bacteroidetes	c__Bacteroidia	o__Bacteroidales	f__Prevotellaceae	g__Prevotella	s__Prevotella_sp._10_H_	3	0	0	93	0	0	0	0	0	0	0	0	0	0	0	0	0	0	0	0
k__Bacteria	p__Bacteroidetes	c__Bacteroidia	o__Bacteroidales	f__Prevotellaceae	g__Prevotella	s__Prevotella_sp._885	14	10	0	54	0	0	4	0	0	0	0	0	0	0	0	0	0	0	0	0
k__Bacteria	p__Bacteroidetes	c__Bacteroidia	o__Bacteroidales	f__Prevotellaceae	g__Prevotella	s__Prevotella_sp._AGR2160	128	90	0	99	0	0	7	0	7	18	0	0	0	0	0	0	0	0	0	0
k__Bacteria	p__Bacteroidetes	c__Bacteroidia	o__Bacteroidales	f__Prevotellaceae	g__Prevotella	s__Prevotella_sp._AG_487_50_53	0	6	0	21	0	0	0	0	0	2	0	0	0	0	0	0	0	0	0	0
k__Bacteria	p__Bacteroidetes	c__Bacteroidia	o__Bacteroidales	f__Prevotellaceae	g__Prevotella	s__Prevotella_sp._AM23_5	0	3	0	3	0	0	0	0	0	3	0	0	0	0	0	0	0	0	0	0
k__Bacteria	p__Bacteroidetes	c__Bacteroidia	o__Bacteroidales	f__Prevotellaceae	g__Prevotella	s__Prevotella_sp._AM34_19LB	28	131	3	29	0	0	0	0	5	31	0	0	0	0	0	0	0	0	0	0
k__Bacteria	p__Bacteroidetes	c__Bacteroidia	o__Bacteroidales	f__Prevotellaceae	g__Prevotella	s__Prevotella_sp._AM42_24	0	31	0	22	0	0	6	0	0	19	0	0	0	0	0	0	0	0	0	0
k__Bacteria	p__Bacteroidetes	c__Bacteroidia	o__Bacteroidales	f__Prevotellaceae	g__Prevotella	s__Prevotella_sp._BP1_145	0	0	0	0	0	0	9	0	0	0	0	0	0	0	0	0	0	0	0	0
k__Bacteria	p__Bacteroidetes	c__Bacteroidia	o__Bacteroidales	f__Prevotellaceae	g__Prevotella	s__Prevotella_sp._BP1_148	25	59	0	0	0	0	8	0	7	0	0	0	0	0	0	0	0	0	0	0
k__Bacteria	p__Bacteroidetes	c__Bacteroidia	o__Bacteroidales	f__Prevotellaceae	g__Prevotella	s__Prevotella_sp._BV3P1	21	69	0	30	0	0	5	0	0	94	0	0	0	0	0	0	0	0	0	0
k__Bacteria	p__Bacteroidetes	c__Bacteroidia	o__Bacteroidales	f__Prevotellaceae	g__Prevotella	s__Prevotella_sp._C561	763	12385	133	832	0	391	838	0	94	3447	0	0	0	0	0	0	0	0	0	0
k__Bacteria	p__Bacteroidetes	c__Bacteroidia	o__Bacteroidales	f__Prevotellaceae	g__Prevotella	s__Prevotella_sp._CAG_1031	4	0	0	20	0	0	0	0	0	0	0	0	0	0	0	0	0	0	0	0
k__Bacteria	p__Bacteroidetes	c__Bacteroidia	o__Bacteroidales	f__Prevotellaceae	g__Prevotella	s__Prevotella_sp._CAG_1058	15	71	0	7	0	2	0	0	0	15	0	0	0	0	0	0	0	0	0	0
k__Bacteria	p__Bacteroidetes	c__Bacteroidia	o__Bacteroidales	f__Prevotellaceae	g__Prevotella	s__Prevotella_sp._CAG_1092	71	183	0	53	0	76	0	0	17	10	0	0	0	0	0	0	0	0	0	0
k__Bacteria	p__Bacteroidetes	c__Bacteroidia	o__Bacteroidales	f__Prevotellaceae	g__Prevotella	s__Prevotella_sp._CAG_1124	0	8	0	24	0	0	0	0	0	3	0	0	0	0	0	0	0	0	0	0
k__Bacteria	p__Bacteroidetes	c__Bacteroidia	o__Bacteroidales	f__Prevotellaceae	g__Prevotella	s__Prevotella_sp._CAG_1185	30	65	0	4	0	4	0	0	0	4	0	0	0	0	0	0	0	0	0	0
k__Bacteria	p__Bacteroidetes	c__Bacteroidia	o__Bacteroidales	f__Prevotellaceae	g__Prevotella	s__Prevotella_sp._CAG_1320	0	16	0	0	0	0	9	0	0	3	0	0	0	0	0	0	0	0	0	0
k__Bacteria	p__Bacteroidetes	c__Bacteroidia	o__Bacteroidales	f__Prevotellaceae	g__Prevotella	s__Prevotella_sp._CAG_255	11	0	0	4	0	0	0	0	0	0	0	0	0	0	0	0	0	0	0	0
k__Bacteria	p__Bacteroidetes	c__Bacteroidia	o__Bacteroidales	f__Prevotellaceae	g__Prevotella	s__Prevotella_sp._CAG_279	3	0	0	0	0	0	0	0	0	0	0	0	0	0	0	0	0	0	0	0
k__Bacteria	p__Bacteroidetes	c__Bacteroidia	o__Bacteroidales	f__Prevotellaceae	g__Prevotella	s__Prevotella_sp._CAG_386	47	62	0	0	0	0	0	0	0	35	0	0	0	0	0	0	0	0	0	0
k__Bacteria	p__Bacteroidetes	c__Bacteroidia	o__Bacteroidales	f__Prevotellaceae	g__Prevotella	s__Prevotella_sp._CAG_474	45	12	0	38	0	0	0	0	12	0	0	0	0	0	0	0	0	0	0	0
k__Bacteria	p__Bacteroidetes	c__Bacteroidia	o__Bacteroidales	f__Prevotellaceae	g__Prevotella	s__Prevotella_sp._CAG_485	0	6	0	42	0	0	4	0	10	0	0	0	0	0	0	0	0	0	0	0
k__Bacteria	p__Bacteroidetes	c__Bacteroidia	o__Bacteroidales	f__Prevotellaceae	g__Prevotella	s__Prevotella_sp._CAG_487	0	4	2	7	0	3	0	0	4	0	0	0	0	0	0	0	0	0	0	0
k__Bacteria	p__Bacteroidetes	c__Bacteroidia	o__Bacteroidales	f__Prevotellaceae	g__Prevotella	s__Prevotella_sp._CAG_520	14	82	0	42	0	2	0	0	5	34	0	0	0	0	0	0	0	0	0	0
k__Bacteria	p__Bacteroidetes	c__Bacteroidia	o__Bacteroidales	f__Prevotellaceae	g__Prevotella	s__Prevotella_sp._CAG_5226	112	87	0	3	0	0	0	0	5	27	0	0	0	0	0	0	0	0	0	0
k__Bacteria	p__Bacteroidetes	c__Bacteroidia	o__Bacteroidales	f__Prevotellaceae	g__Prevotella	s__Prevotella_sp._CAG_604	0	15	0	8	0	0	0	0	0	0	0	0	0	0	0	0	0	0	0	0
k__Bacteria	p__Bacteroidetes	c__Bacteroidia	o__Bacteroidales	f__Prevotellaceae	g__Prevotella	s__Prevotella_sp._CAG_617	0	139	0	61	0	0	0	0	20	21	0	0	0	0	0	0	0	0	0	0
k__Bacteria	p__Bacteroidetes	c__Bacteroidia	o__Bacteroidales	f__Prevotellaceae	g__Prevotella	s__Prevotella_sp._CAG_732	3	75	0	36	0	0	27	0	9	19	0	0	0	0	0	0	0	0	0	0
k__Bacteria	p__Bacteroidetes	c__Bacteroidia	o__Bacteroidales	f__Prevotellaceae	g__Prevotella	s__Prevotella_sp._CAG_755	49	49	0	17	0	0	4	0	0	32	0	0	0	0	0	0	0	0	0	0
k__Bacteria	p__Bacteroidetes	c__Bacteroidia	o__Bacteroidales	f__Prevotellaceae	g__Prevotella	s__Prevotella_sp._CAG_873	46	0	0	0	0	0	0	0	0	29	0	0	0	0	0	0	0	0	0	0
k__Bacteria	p__Bacteroidetes	c__Bacteroidia	o__Bacteroidales	f__Prevotellaceae	g__Prevotella	s__Prevotella_sp._CAG_891	94	163	55	58	0	2	8	0	23	56	0	0	0	0	0	0	0	0	0	0
k__Bacteria	p__Bacteroidetes	c__Bacteroidia	o__Bacteroidales	f__Prevotellaceae	g__Prevotella	s__Prevotella_sp._CAG_924	0	132	0	55	0	0	0	0	16	20	0	0	0	0	0	0	0	0	0	0
k__Bacteria	p__Bacteroidetes	c__Bacteroidia	o__Bacteroidales	f__Prevotellaceae	g__Prevotella	s__Prevotella_sp._DNF00663	5	26	0	71	0	4	42	0	11	54	0	0	0	0	0	0	0	0	0	0
k__Bacteria	p__Bacteroidetes	c__Bacteroidia	o__Bacteroidales	f__Prevotellaceae	g__Prevotella	s__Prevotella_sp._F0091	4528	8041	560	4495	0	194	2029	0	1123	3127	0	0	0	0	0	0	0	0	0	0
k__Bacteria	p__Bacteroidetes	c__Bacteroidia	o__Bacteroidales	f__Prevotellaceae	g__Prevotella	s__Prevotella_sp._FD3004	0	129	0	0	0	0	0	0	0	0	0	0	0	0	0	0	0	0	0	0
k__Bacteria	p__Bacteroidetes	c__Bacteroidia	o__Bacteroidales	f__Prevotellaceae	g__Prevotella	s__Prevotella_sp._HJM029	77	4449	12	245	0	9	43	0	30	7614	0	0	0	0	0	0	0	0	0	0
k__Bacteria	p__Bacteroidetes	c__Bacteroidia	o__Bacteroidales	f__Prevotellaceae	g__Prevotella	s__Prevotella_sp._HMSC069G02	4	244	9	115	0	12	0	0	11	168	0	0	0	0	0	0	0	0	0	0
k__Bacteria	p__Bacteroidetes	c__Bacteroidia	o__Bacteroidales	f__Prevotellaceae	g__Prevotella	s__Prevotella_sp._HMSC073D09	68	13	3	241	0	0	60	0	0	84	0	0	0	0	0	0	0	0	0	0
k__Bacteria	p__Bacteroidetes	c__Bacteroidia	o__Bacteroidales	f__Prevotellaceae	g__Prevotella	s__Prevotella_sp._HMSC077E08	0	88	0	22	0	0	0	0	0	21	0	0	0	0	0	0	0	0	0	0
k__Bacteria	p__Bacteroidetes	c__Bacteroidia	o__Bacteroidales	f__Prevotellaceae	g__Prevotella	s__Prevotella_sp._HMSC077E09	6	534	7	147	0	5	42	0	0	43	0	0	0	0	0	0	0	0	0	0
k__Bacteria	p__Bacteroidetes	c__Bacteroidia	o__Bacteroidales	f__Prevotellaceae	g__Prevotella	s__Prevotella_sp._HUN102	197	645	8	309	0	0	50	0	42	29	0	0	0	0	0	0	0	0	0	0
k__Bacteria	p__Bacteroidetes	c__Bacteroidia	o__Bacteroidales	f__Prevotellaceae	g__Prevotella	s__Prevotella_sp._ICM33	6842	14948	472	4434	0	470	5232	10	894	6098	0	0	0	0	0	0	0	0	0	0
k__Bacteria	p__Bacteroidetes	c__Bacteroidia	o__Bacteroidales	f__Prevotellaceae	g__Prevotella	s__Prevotella_sp._KH2C16	12	211	0	686	0	8	141	0	4	13	0	0	0	0	0	0	0	0	0	0
k__Bacteria	p__Bacteroidetes	c__Bacteroidia	o__Bacteroidales	f__Prevotellaceae	g__Prevotella	s__Prevotella_sp._MA2016	0	3	0	0	0	0	0	0	0	0	0	0	0	0	0	0	0	0	0	0
k__Bacteria	p__Bacteroidetes	c__Bacteroidia	o__Bacteroidales	f__Prevotellaceae	g__Prevotella	s__Prevotella_sp._MGM1	0	7	0	16	0	0	0	0	5	0	0	0	0	0	0	0	0	0	0	0
k__Bacteria	p__Bacteroidetes	c__Bacteroidia	o__Bacteroidales	f__Prevotellaceae	g__Prevotella	s__Prevotella_sp._MGM2	162	97	0	237	0	0	0	0	20	110	0	0	0	0	0	0	0	0	0	0
k__Bacteria	p__Bacteroidetes	c__Bacteroidia	o__Bacteroidales	f__Prevotellaceae	g__Prevotella	s__Prevotella_sp._MSX73	25	517	24	321	0	5	26	0	9	129	0	0	0	0	0	0	0	0	0	0
k__Bacteria	p__Bacteroidetes	c__Bacteroidia	o__Bacteroidales	f__Prevotellaceae	g__Prevotella	s__Prevotella_sp._Marseille_P4119	29	22	3	104	0	0	17	0	2	79	0	0	0	0	0	0	0	0	0	0
k__Bacteria	p__Bacteroidetes	c__Bacteroidia	o__Bacteroidales	f__Prevotellaceae	g__Prevotella	s__Prevotella_sp._Marseille_P4334	87	429	14	362	0	15	55	4	39	357	0	0	0	0	0	0	0	0	0	0
k__Bacteria	p__Bacteroidetes	c__Bacteroidia	o__Bacteroidales	f__Prevotellaceae	g__Prevotella	s__Prevotella_sp._OH937_COT_195	52	51	12	71	0	0	264	0	20	6	0	0	0	0	0	0	0	0	0	0
k__Bacteria	p__Bacteroidetes	c__Bacteroidia	o__Bacteroidales	f__Prevotellaceae	g__Prevotella	s__Prevotella_sp._P2_180	3	5	0	38	0	4	6	0	0	12	0	0	0	0	0	0	0	0	0	0
k__Bacteria	p__Bacteroidetes	c__Bacteroidia	o__Bacteroidales	f__Prevotellaceae	g__Prevotella	s__Prevotella_sp._P3_120	9	0	0	0	0	0	0	0	0	5	0	0	0	0	0	0	68	0	0	0
k__Bacteria	p__Bacteroidetes	c__Bacteroidia	o__Bacteroidales	f__Prevotellaceae	g__Prevotella	s__Prevotella_sp._P3_122	78	146	9	88	0	0	76	0	0	3	0	0	0	0	0	0	0	0	0	0
k__Bacteria	p__Bacteroidetes	c__Bacteroidia	o__Bacteroidales	f__Prevotellaceae	g__Prevotella	s__Prevotella_sp._P3_92	0	0	0	0	0	0	0	0	0	3	0	0	0	0	0	0	0	0	0	0
k__Bacteria	p__Bacteroidetes	c__Bacteroidia	o__Bacteroidales	f__Prevotellaceae	g__Prevotella	s__Prevotella_sp._P4_119	4	42	0	3	0	0	0	0	0	0	0	0	0	0	0	0	0	0	0	0
k__Bacteria	p__Bacteroidetes	c__Bacteroidia	o__Bacteroidales	f__Prevotellaceae	g__Prevotella	s__Prevotella_sp._P4_51	0	0	0	62	0	0	36	0	0	113	0	0	0	0	0	0	0	0	0	0
k__Bacteria	p__Bacteroidetes	c__Bacteroidia	o__Bacteroidales	f__Prevotellaceae	g__Prevotella	s__Prevotella_sp._P4_67	0	22	0	3	0	0	0	0	0	0	0	0	0	0	0	0	0	0	0	0
k__Bacteria	p__Bacteroidetes	c__Bacteroidia	o__Bacteroidales	f__Prevotellaceae	g__Prevotella	s__Prevotella_sp._P4_98	12	23	0	3	0	0	0	0	0	27	0	0	0	0	0	0	0	0	0	0
k__Bacteria	p__Bacteroidetes	c__Bacteroidia	o__Bacteroidales	f__Prevotellaceae	g__Prevotella	s__Prevotella_sp._P5_108	0	57	0	23	0	0	0	0	0	0	0	0	0	0	0	0	0	0	0	0
k__Bacteria	p__Bacteroidetes	c__Bacteroidia	o__Bacteroidales	f__Prevotellaceae	g__Prevotella	s__Prevotella_sp._P5_126	2	124	0	5	0	0	0	0	7	35	0	0	0	0	0	0	0	0	0	0
k__Bacteria	p__Bacteroidetes	c__Bacteroidia	o__Bacteroidales	f__Prevotellaceae	g__Prevotella	s__Prevotella_sp._P5_50	16	0	0	19	0	0	0	0	0	0	0	0	0	0	0	0	0	0	0	0
k__Bacteria	p__Bacteroidetes	c__Bacteroidia	o__Bacteroidales	f__Prevotellaceae	g__Prevotella	s__Prevotella_sp._P5_64	15	44	0	74	0	0	0	0	18	9	0	0	0	0	0	0	0	0	0	0
k__Bacteria	p__Bacteroidetes	c__Bacteroidia	o__Bacteroidales	f__Prevotellaceae	g__Prevotella	s__Prevotella_sp._P5_92	0	6	0	35	0	0	0	0	0	13	0	0	0	0	0	0	0	0	0	0
k__Bacteria	p__Bacteroidetes	c__Bacteroidia	o__Bacteroidales	f__Prevotellaceae	g__Prevotella	s__Prevotella_sp._P6B1	9	4	0	6	0	0	5	0	0	0	0	0	0	0	0	0	0	0	0	0
k__Bacteria	p__Bacteroidetes	c__Bacteroidia	o__Bacteroidales	f__Prevotellaceae	g__Prevotella	s__Prevotella_sp._P6B4	0	0	0	22	0	0	0	0	0	0	0	0	0	0	0	0	0	0	0	0
k__Bacteria	p__Bacteroidetes	c__Bacteroidia	o__Bacteroidales	f__Prevotellaceae	g__Prevotella	s__Prevotella_sp._RM4	0	8	0	0	0	0	0	0	0	0	0	0	0	0	0	0	0	0	0	0
k__Bacteria	p__Bacteroidetes	c__Bacteroidia	o__Bacteroidales	f__Prevotellaceae	g__Prevotella	s__Prevotella_sp._S7_1_8	65	637	8	316	0	0	183	0	16	170	0	0	0	0	0	0	0	0	0	0
k__Bacteria	p__Bacteroidetes	c__Bacteroidia	o__Bacteroidales	f__Prevotellaceae	g__Prevotella	s__Prevotella_sp._S7_MS_2	10	63	0	47	0	0	40	0	4	118	0	0	0	0	0	0	0	0	0	0
k__Bacteria	p__Bacteroidetes	c__Bacteroidia	o__Bacteroidales	f__Prevotellaceae	g__Prevotella	s__Prevotella_sp._TF12_30	0	0	0	9	0	0	0	0	0	0	0	0	0	0	0	0	0	0	0	0
k__Bacteria	p__Bacteroidetes	c__Bacteroidia	o__Bacteroidales	f__Prevotellaceae	g__Prevotella	s__Prevotella_sp._kh1p2	9	336	0	235	0	0	35	0	4	143	0	0	0	0	0	0	0	0	0	0
k__Bacteria	p__Bacteroidetes	c__Bacteroidia	o__Bacteroidales	f__Prevotellaceae	g__Prevotella	s__Prevotella_sp._khp1	0	59	0	38	0	0	0	0	0	0	0	0	0	0	0	0	0	0	0	0
k__Bacteria	p__Bacteroidetes	c__Bacteroidia	o__Bacteroidales	f__Prevotellaceae	g__Prevotella	s__Prevotella_sp._khp7	0	0	0	43	0	0	0	0	0	0	0	0	0	0	0	0	0	0	0	0
k__Bacteria	p__Bacteroidetes	c__Bacteroidia	o__Bacteroidales	f__Prevotellaceae	g__Prevotella	s__Prevotella_sp._lc2012	0	8	0	13	0	0	11	0	0	0	0	0	0	0	0	0	0	0	0	0
k__Bacteria	p__Bacteroidetes	c__Bacteroidia	o__Bacteroidales	f__Prevotellaceae	g__Prevotella	s__Prevotella_sp._ne3005	0	0	0	10	0	0	0	0	4	0	0	0	0	0	0	0	0	0	0	0
k__Bacteria	p__Bacteroidetes	c__Bacteroidia	o__Bacteroidales	f__Prevotellaceae	g__Prevotella	s__Prevotella_sp._oral_taxon_299	3725	1994	139	1543	0	0	50	0	958	1845	0	0	0	0	0	0	0	0	0	0
k__Bacteria	p__Bacteroidetes	c__Bacteroidia	o__Bacteroidales	f__Prevotellaceae	g__Prevotella	s__Prevotella_sp._oral_taxon_306	928	16777	16	8587	0	239	847	0	65	14831	0	0	0	0	0	0	0	0	0	0
k__Bacteria	p__Bacteroidetes	c__Bacteroidia	o__Bacteroidales	f__Prevotellaceae	g__Prevotella	s__Prevotella_sp._oral_taxon_313	797	13279	52	814	0	277	951	0	137	4077	0	0	0	0	0	0	0	0	0	0
k__Bacteria	p__Bacteroidetes	c__Bacteroidia	o__Bacteroidales	f__Prevotellaceae	g__Prevotella	s__Prevotella_sp._oral_taxon_317	371	366	71	746	0	20	254	0	62	394	0	0	0	0	0	0	0	0	0	0
k__Bacteria	p__Bacteroidetes	c__Bacteroidia	o__Bacteroidales	f__Prevotellaceae	g__Prevotella	s__Prevotella_sp._oral_taxon_376	83	256	0	447	0	0	60	0	0	115	0	0	0	0	0	0	0	0	0	0
k__Bacteria	p__Bacteroidetes	c__Bacteroidia	o__Bacteroidales	f__Prevotellaceae	g__Prevotella	s__Prevotella_sp._oral_taxon_472	458	78	32	914	0	10	160	2	26	549	0	0	0	0	0	0	0	0	0	0
k__Bacteria	p__Bacteroidetes	c__Bacteroidia	o__Bacteroidales	f__Prevotellaceae	g__Prevotella	s__Prevotella_sp._oral_taxon_820	75	170	4	17587	0	0	121	0	35	232	0	0	0	0	0	0	0	0	0	0
k__Bacteria	p__Bacteroidetes	c__Bacteroidia	o__Bacteroidales	f__Prevotellaceae	g__Prevotella	s__Prevotella_sp._tc2_28	38	69	0	14	0	0	5	0	0	9	0	0	0	0	0	0	0	0	0	0
k__Bacteria	p__Bacteroidetes	c__Bacteroidia	o__Bacteroidales	f__Prevotellaceae	g__Prevotella	s__Prevotella_sp._tf2_5	8	72	0	13	0	0	0	0	63	12	0	0	0	0	0	0	0	0	0	0
k__Bacteria	p__Bacteroidetes	c__Bacteroidia	o__Bacteroidales	f__Prevotellaceae	g__Prevotella	s__Prevotella_stercorea	53	134	74	52	0	4	4	0	12	116	0	0	0	0	0	0	0	0	0	0
k__Bacteria	p__Bacteroidetes	c__Bacteroidia	o__Bacteroidales	f__Prevotellaceae	g__Prevotella	s__Prevotella_stercorea_CAG_629	0	6	0	0	0	0	0	0	0	0	0	0	0	0	0	0	0	0	0	0
k__Bacteria	p__Bacteroidetes	c__Bacteroidia	o__Bacteroidales	f__Prevotellaceae	g__Prevotella	s__Prevotella_timonensis	327	1122	33	596	0	31	368	0	492	978	0	0	0	0	0	0	0	0	0	0
k__Bacteria	p__Bacteroidetes	c__Bacteroidia	o__Bacteroidales	f__Prevotellaceae	g__Prevotella	s__Prevotella_veroralis	1421	26249	51	12098	0	98	2437	0	189	21170	0	0	0	0	0	0	0	0	0	0
k__Bacteria	p__Bacteroidetes	c__Bacteroidia	o__Bacteroidales	f__Prevotellaceae	g__Prevotella	s__Unclassified	51877	123935	4894	63700	0	5572	26158	59	11959	71123	0	0	0	0	0	0	0	0	0	0
k__Bacteria	p__Bacteroidetes	c__Bacteroidia	o__Bacteroidales	f__Prevotellaceae	g__Prevotella	s__uncultured_Prevotella_sp.	0	0	0	0	0	0	170	0	0	0	0	0	0	0	0	0	0	0	0	0
k__Bacteria	p__Bacteroidetes	c__Bacteroidia	o__Bacteroidales	f__Prevotellaceae	g__Prevotellamassilia	s__Prevotellamassilia_timonensis	36	146	0	67	0	0	114	0	17	26	0	0	0	0	0	0	0	0	0	0
k__Bacteria	p__Bacteroidetes	c__Bacteroidia	o__Bacteroidales	f__Prevotellaceae	g__Pseudoprevotella	s__Pseudoprevotella_muciniphila	42	135	0	60	0	0	0	0	30	69	0	0	0	0	0	0	0	0	0	0
k__Bacteria	p__Bacteroidetes	c__Bacteroidia	o__Bacteroidales	f__Prevotellaceae	g__Unclassified	s__Prevotellaceae_bacterium	0	79	0	91	0	0	0	0	0	10	0	0	0	0	0	0	0	0	0	0
k__Bacteria	p__Bacteroidetes	c__Bacteroidia	o__Bacteroidales	f__Prevotellaceae	g__Unclassified	s__Prevotellaceae_bacterium_HUN156	6	34	0	9	0	0	0	0	0	0	0	0	0	0	0	0	0	0	0	0
k__Bacteria	p__Bacteroidetes	c__Bacteroidia	o__Bacteroidales	f__Prevotellaceae	g__Unclassified	s__Prevotellaceae_bacterium_KH2P17	15	136	0	15	0	12	25	0	0	161	0	0	0	0	0	0	0	0	0	0
k__Bacteria	p__Bacteroidetes	c__Bacteroidia	o__Bacteroidales	f__Prevotellaceae	g__Unclassified	s__Prevotellaceae_bacterium_MN60	0	105	0	4	0	0	0	0	0	0	0	0	0	0	0	0	0	0	0	0
k__Bacteria	p__Bacteroidetes	c__Bacteroidia	o__Bacteroidales	f__Prevotellaceae	g__Unclassified	s__Prevotellaceae_bacterium_Marseille_P2826	4034	8779	3448	1733	0	6	513	5	652	1640	0	0	0	0	0	0	0	0	0	0
k__Bacteria	p__Bacteroidetes	c__Bacteroidia	o__Bacteroidales	f__Prevotellaceae	g__Unclassified	s__Unclassified	5850	10360	1028	4787	0	191	1312	2	1621	4968	0	0	0	0	0	0	0	0	0	0
k__Bacteria	p__Bacteroidetes	c__Bacteroidia	o__Bacteroidales	f__Rikenellaceae	g__Alistipes	s__Alistipes_communis	3	0	0	20	0	0	0	0	0	12	0	0	0	0	0	0	0	0	0	0
k__Bacteria	p__Bacteroidetes	c__Bacteroidia	o__Bacteroidales	f__Rikenellaceae	g__Alistipes	s__Alistipes_finegoldii	0	0	0	7	0	0	0	0	17	0	0	0	0	0	0	0	0	0	0	0
k__Bacteria	p__Bacteroidetes	c__Bacteroidia	o__Bacteroidales	f__Rikenellaceae	g__Alistipes	s__Alistipes_ihumii	0	7	0	109	0	0	0	0	7	14	0	0	0	0	0	0	0	0	0	0
k__Bacteria	p__Bacteroidetes	c__Bacteroidia	o__Bacteroidales	f__Rikenellaceae	g__Alistipes	s__Alistipes_indistinctus	5	0	0	65	0	0	0	0	0	3	0	0	0	0	0	0	0	0	0	0
k__Bacteria	p__Bacteroidetes	c__Bacteroidia	o__Bacteroidales	f__Rikenellaceae	g__Alistipes	s__Alistipes_inops	12	0	0	0	0	0	0	0	0	0	0	0	0	0	0	0	0	0	0	0
k__Bacteria	p__Bacteroidetes	c__Bacteroidia	o__Bacteroidales	f__Rikenellaceae	g__Alistipes	s__Alistipes_onderdonkii	0	0	0	6	0	0	0	0	0	0	0	0	0	0	0	0	0	0	0	0
k__Bacteria	p__Bacteroidetes	c__Bacteroidia	o__Bacteroidales	f__Rikenellaceae	g__Alistipes	s__Alistipes_putredinis	0	3	0	15	0	0	0	0	3	144	0	0	0	0	0	0	0	0	0	0
k__Bacteria	p__Bacteroidetes	c__Bacteroidia	o__Bacteroidales	f__Rikenellaceae	g__Alistipes	s__Alistipes_putredinis_CAG_67	13	0	0	11	0	0	0	0	0	0	0	0	0	0	0	0	0	0	0	0
k__Bacteria	p__Bacteroidetes	c__Bacteroidia	o__Bacteroidales	f__Rikenellaceae	g__Alistipes	s__Alistipes_senegalensis	0	3	0	0	0	0	0	0	0	0	0	0	0	0	0	0	0	0	0	0
k__Bacteria	p__Bacteroidetes	c__Bacteroidia	o__Bacteroidales	f__Rikenellaceae	g__Alistipes	s__Alistipes_shahii	0	0	0	0	0	0	0	0	0	43	0	0	0	0	0	0	0	0	0	0
k__Bacteria	p__Bacteroidetes	c__Bacteroidia	o__Bacteroidales	f__Rikenellaceae	g__Alistipes	s__Alistipes_sp._56_11	0	0	0	14	0	0	0	0	0	0	0	0	0	0	0	0	0	0	0	0
k__Bacteria	p__Bacteroidetes	c__Bacteroidia	o__Bacteroidales	f__Rikenellaceae	g__Alistipes	s__Alistipes_sp._AF14_19	0	0	0	0	0	0	0	0	0	10	0	0	0	0	0	0	0	0	0	0
k__Bacteria	p__Bacteroidetes	c__Bacteroidia	o__Bacteroidales	f__Rikenellaceae	g__Alistipes	s__Alistipes_sp._AF17_16	0	0	0	9	0	0	0	0	0	0	0	0	0	0	0	0	0	0	0	0
k__Bacteria	p__Bacteroidetes	c__Bacteroidia	o__Bacteroidales	f__Rikenellaceae	g__Alistipes	s__Alistipes_sp._An116	0	38	0	2	0	0	0	0	0	19	0	0	0	0	0	0	0	0	0	0
k__Bacteria	p__Bacteroidetes	c__Bacteroidia	o__Bacteroidales	f__Rikenellaceae	g__Alistipes	s__Alistipes_sp._An31A	0	0	0	0	0	0	0	0	0	0	0	0	0	0	0	0	0	0	0	0
k__Bacteria	p__Bacteroidetes	c__Bacteroidia	o__Bacteroidales	f__Rikenellaceae	g__Alistipes	s__Alistipes_sp._An54	0	0	0	27	0	0	5	0	0	0	0	0	0	0	0	0	0	0	0	0
k__Bacteria	p__Bacteroidetes	c__Bacteroidia	o__Bacteroidales	f__Rikenellaceae	g__Alistipes	s__Alistipes_sp._An66	0	3	0	11	0	0	0	0	0	0	0	0	0	0	0	0	0	0	0	0
k__Bacteria	p__Bacteroidetes	c__Bacteroidia	o__Bacteroidales	f__Rikenellaceae	g__Alistipes	s__Alistipes_sp._CAG_157	7	0	0	0	0	0	19	0	0	0	0	0	0	0	0	0	0	0	0	0
k__Bacteria	p__Bacteroidetes	c__Bacteroidia	o__Bacteroidales	f__Rikenellaceae	g__Alistipes	s__Alistipes_sp._CAG_268	0	4	0	15	0	0	6	0	0	4	0	0	0	0	0	0	0	0	0	0
k__Bacteria	p__Bacteroidetes	c__Bacteroidia	o__Bacteroidales	f__Rikenellaceae	g__Alistipes	s__Alistipes_sp._CAG_29	0	0	0	2	0	0	21	0	2	0	0	0	0	0	0	0	0	0	0	0
k__Bacteria	p__Bacteroidetes	c__Bacteroidia	o__Bacteroidales	f__Rikenellaceae	g__Alistipes	s__Alistipes_sp._CAG_435	0	10	0	0	0	0	0	0	0	4	0	0	0	0	0	0	0	0	0	0
k__Bacteria	p__Bacteroidetes	c__Bacteroidia	o__Bacteroidales	f__Rikenellaceae	g__Alistipes	s__Alistipes_sp._CAG_514	0	0	0	0	0	0	0	0	0	0	0	0	0	0	0	0	0	0	0	0
k__Bacteria	p__Bacteroidetes	c__Bacteroidia	o__Bacteroidales	f__Rikenellaceae	g__Alistipes	s__Alistipes_sp._CAG_831	0	0	0	12	0	0	4	0	0	0	0	0	0	0	0	0	0	0	0	0
k__Bacteria	p__Bacteroidetes	c__Bacteroidia	o__Bacteroidales	f__Rikenellaceae	g__Alistipes	s__Alistipes_sp._CHKCI003	0	4	0	17	0	0	0	0	0	0	0	0	0	0	0	0	0	0	0	0
k__Bacteria	p__Bacteroidetes	c__Bacteroidia	o__Bacteroidales	f__Rikenellaceae	g__Alistipes	s__Alistipes_sp._HGB5	0	4	0	22	0	0	0	0	0	25	0	0	0	0	0	0	0	0	0	0
k__Bacteria	p__Bacteroidetes	c__Bacteroidia	o__Bacteroidales	f__Rikenellaceae	g__Alistipes	s__Alistipes_sp._ZOR0009	0	22	0	96	0	0	0	0	0	0	0	0	0	0	0	0	0	0	0	0
k__Bacteria	p__Bacteroidetes	c__Bacteroidia	o__Bacteroidales	f__Rikenellaceae	g__Alistipes	s__Alistipes_timonensis	0	12	0	0	0	0	0	0	0	0	0	0	0	0	0	0	0	0	0	0
k__Bacteria	p__Bacteroidetes	c__Bacteroidia	o__Bacteroidales	f__Rikenellaceae	g__Alistipes	s__Unclassified	0	0	0	42	0	0	0	0	0	25	0	0	0	0	0	0	0	0	0	0
k__Bacteria	p__Bacteroidetes	c__Bacteroidia	o__Bacteroidales	f__Rikenellaceae	g__Millionella	s__Millionella_massiliensis	7	0	0	21	0	0	0	0	0	0	0	0	0	0	0	0	0	0	0	0
k__Bacteria	p__Bacteroidetes	c__Bacteroidia	o__Bacteroidales	f__Rikenellaceae	g__Mucinivorans	s__Mucinivorans_hirudinis	0	33	0	29	0	0	0	0	0	0	0	0	0	0	0	0	0	0	0	0
k__Bacteria	p__Bacteroidetes	c__Bacteroidia	o__Bacteroidales	f__Rikenellaceae	g__Rikenella	s__Rikenella_microfusus	30	0	0	130	0	0	0	0	0	0	0	0	0	0	0	0	0	0	0	0
k__Bacteria	p__Bacteroidetes	c__Bacteroidia	o__Bacteroidales	f__Rikenellaceae	g__Unclassified	s__Unclassified	0	0	0	31	0	0	0	0	0	0	0	0	0	0	0	0	0	0	0	0
k__Bacteria	p__Bacteroidetes	c__Bacteroidia	o__Bacteroidales	f__Salinivirgaceae	g__Salinivirga	s__Salinivirga_cyanobacteriivorans	0	0	0	46	0	0	0	0	0	4	0	0	0	0	0	0	0	0	0	0
k__Bacteria	p__Bacteroidetes	c__Bacteroidia	o__Bacteroidales	f__Salinivirgaceae	g__Unclassified	s__Salinivirgaceae_bacterium	0	0	0	12	0	0	0	0	0	0	0	0	0	0	0	0	0	0	0	0
k__Bacteria	p__Bacteroidetes	c__Bacteroidia	o__Bacteroidales	f__Tannerellaceae	g__Parabacteroides	s__Parabacteroides_bouchesdurhonensis	0	0	0	0	0	0	0	0	0	3	0	0	0	0	0	0	0	0	0	0
k__Bacteria	p__Bacteroidetes	c__Bacteroidia	o__Bacteroidales	f__Tannerellaceae	g__Parabacteroides	s__Parabacteroides_chartae	0	0	0	3	0	0	0	0	0	0	0	0	0	0	0	0	0	0	0	0
k__Bacteria	p__Bacteroidetes	c__Bacteroidia	o__Bacteroidales	f__Tannerellaceae	g__Parabacteroides	s__Parabacteroides_distasonis	50	6	0	97	0	0	93	0	37	36	0	0	0	0	0	0	0	0	0	0
k__Bacteria	p__Bacteroidetes	c__Bacteroidia	o__Bacteroidales	f__Tannerellaceae	g__Parabacteroides	s__Parabacteroides_goldsteinii	3	0	0	38	0	0	0	0	98	0	0	0	0	0	0	0	0	0	0	0
k__Bacteria	p__Bacteroidetes	c__Bacteroidia	o__Bacteroidales	f__Tannerellaceae	g__Parabacteroides	s__Parabacteroides_gordonii	0	0	3	0	0	0	0	0	0	0	0	0	0	0	0	0	0	0	6	0
k__Bacteria	p__Bacteroidetes	c__Bacteroidia	o__Bacteroidales	f__Tannerellaceae	g__Parabacteroides	s__Parabacteroides_johnsonii	0	10	0	0	0	0	0	0	0	0	0	0	0	0	0	0	0	0	0	0
k__Bacteria	p__Bacteroidetes	c__Bacteroidia	o__Bacteroidales	f__Tannerellaceae	g__Parabacteroides	s__Parabacteroides_johnsonii_CAG_246	0	0	0	24	0	0	0	0	0	0	0	0	0	0	0	0	0	0	0	0
k__Bacteria	p__Bacteroidetes	c__Bacteroidia	o__Bacteroidales	f__Tannerellaceae	g__Parabacteroides	s__Parabacteroides_massiliensis	0	53	0	0	0	0	4	0	0	0	0	0	0	0	0	0	0	0	0	0
k__Bacteria	p__Bacteroidetes	c__Bacteroidia	o__Bacteroidales	f__Tannerellaceae	g__Parabacteroides	s__Parabacteroides_merdae	13	142	14	15	0	0	9	0	3	44	0	0	0	0	0	0	0	0	0	0
k__Bacteria	p__Bacteroidetes	c__Bacteroidia	o__Bacteroidales	f__Tannerellaceae	g__Parabacteroides	s__Parabacteroides_merdae_CAG_48	0	0	0	23	0	0	0	0	0	0	0	0	0	0	0	0	0	0	0	0
k__Bacteria	p__Bacteroidetes	c__Bacteroidia	o__Bacteroidales	f__Tannerellaceae	g__Parabacteroides	s__Parabacteroides_pacaensis	0	0	0	218	0	0	0	16	0	83	0	0	0	0	0	0	0	0	0	0
k__Bacteria	p__Bacteroidetes	c__Bacteroidia	o__Bacteroidales	f__Tannerellaceae	g__Parabacteroides	s__Parabacteroides_sp._20_3	30	228	3	59	0	3	17	0	6	117	0	0	0	0	0	0	0	0	0	0
k__Bacteria	p__Bacteroidetes	c__Bacteroidia	o__Bacteroidales	f__Tannerellaceae	g__Parabacteroides	s__Parabacteroides_sp._AF14_59	4	44	0	0	0	0	0	0	0	0	0	0	0	0	0	0	0	0	0	0
k__Bacteria	p__Bacteroidetes	c__Bacteroidia	o__Bacteroidales	f__Tannerellaceae	g__Parabacteroides	s__Parabacteroides_sp._AF17_28	0	63	0	5	0	0	0	0	0	17	0	0	0	0	0	0	0	0	0	0
k__Bacteria	p__Bacteroidetes	c__Bacteroidia	o__Bacteroidales	f__Tannerellaceae	g__Parabacteroides	s__Parabacteroides_sp._AF17_3	0	35	0	19	0	0	0	0	4	20	0	0	0	0	0	0	0	0	0	0
k__Bacteria	p__Bacteroidetes	c__Bacteroidia	o__Bacteroidales	f__Tannerellaceae	g__Parabacteroides	s__Parabacteroides_sp._AF18_52	0	0	0	0	0	0	0	0	0	4	0	0	0	0	0	0	0	0	0	0
k__Bacteria	p__Bacteroidetes	c__Bacteroidia	o__Bacteroidales	f__Tannerellaceae	g__Parabacteroides	s__Parabacteroides_sp._AF19_14	0	3	0	0	0	0	0	0	0	0	0	0	0	0	0	0	0	0	0	0
k__Bacteria	p__Bacteroidetes	c__Bacteroidia	o__Bacteroidales	f__Tannerellaceae	g__Parabacteroides	s__Parabacteroides_sp._AM08_6	0	4	0	6	0	0	0	0	0	0	0	0	0	0	0	0	0	0	0	0
k__Bacteria	p__Bacteroidetes	c__Bacteroidia	o__Bacteroidales	f__Tannerellaceae	g__Parabacteroides	s__Parabacteroides_sp._AM17_47	0	26	0	52	0	4	0	0	7	86	0	0	0	0	0	0	0	0	0	0
k__Bacteria	p__Bacteroidetes	c__Bacteroidia	o__Bacteroidales	f__Tannerellaceae	g__Parabacteroides	s__Parabacteroides_sp._AM18_12LB	7	0	0	5	0	0	0	0	0	0	0	0	0	0	0	0	0	0	0	0
k__Bacteria	p__Bacteroidetes	c__Bacteroidia	o__Bacteroidales	f__Tannerellaceae	g__Parabacteroides	s__Parabacteroides_sp._An277	0	0	0	29	0	0	0	0	0	0	0	0	0	0	0	0	0	0	0	0
k__Bacteria	p__Bacteroidetes	c__Bacteroidia	o__Bacteroidales	f__Tannerellaceae	g__Parabacteroides	s__Parabacteroides_sp._CAG_409	13	0	0	19	0	0	0	0	6	0	0	0	0	0	0	0	0	0	0	0
k__Bacteria	p__Bacteroidetes	c__Bacteroidia	o__Bacteroidales	f__Tannerellaceae	g__Parabacteroides	s__Parabacteroides_sp._CH2_D42_20	8	0	0	0	0	0	0	0	0	0	0	0	0	0	0	0	0	0	0	0
k__Bacteria	p__Bacteroidetes	c__Bacteroidia	o__Bacteroidales	f__Tannerellaceae	g__Parabacteroides	s__Parabacteroides_sp._D13	0	12	0	84	0	0	0	0	0	0	0	0	0	0	0	0	0	0	0	0
k__Bacteria	p__Bacteroidetes	c__Bacteroidia	o__Bacteroidales	f__Tannerellaceae	g__Parabacteroides	s__Parabacteroides_sp._D26	5	7	3	19	0	0	4	0	1	20	0	0	0	0	0	0	0	0	0	0
k__Bacteria	p__Bacteroidetes	c__Bacteroidia	o__Bacteroidales	f__Tannerellaceae	g__Parabacteroides	s__Parabacteroides_sp._Marseille_P3160	0	0	0	49	0	0	0	0	0	3	0	0	0	0	0	0	0	0	0	0
k__Bacteria	p__Bacteroidetes	c__Bacteroidia	o__Bacteroidales	f__Tannerellaceae	g__Parabacteroides	s__Parabacteroides_sp._TM07_1AC	0	0	0	91	0	0	0	0	0	0	0	0	0	0	0	0	0	0	0	0
k__Bacteria	p__Bacteroidetes	c__Bacteroidia	o__Bacteroidales	f__Tannerellaceae	g__Parabacteroides	s__Parabacteroides_sp._merdae_related_45_40	0	0	0	0	0	0	3	0	0	0	0	0	0	0	0	0	0	0	0	0
k__Bacteria	p__Bacteroidetes	c__Bacteroidia	o__Bacteroidales	f__Tannerellaceae	g__Parabacteroides	s__Parabacteroides_timonensis	5	8	0	17	0	0	0	0	4	0	0	0	0	0	0	0	0	0	0	0
k__Bacteria	p__Bacteroidetes	c__Bacteroidia	o__Bacteroidales	f__Tannerellaceae	g__Parabacteroides	s__Unclassified	33	33	4	64	0	0	5	0	0	109	0	0	0	0	0	0	0	0	0	0
k__Bacteria	p__Bacteroidetes	c__Bacteroidia	o__Bacteroidales	f__Tannerellaceae	g__Tannerella	s__Tannerella_forsythia	89	660	13	1679	0	9	76	0	13	32	0	0	0	0	0	0	0	0	0	0
k__Bacteria	p__Bacteroidetes	c__Bacteroidia	o__Bacteroidales	f__Tannerellaceae	g__Tannerella	s__Tannerella_sp.	7	9759	1	12671	0	0	381	0	0	321	0	0	0	0	0	0	0	0	0	0
k__Bacteria	p__Bacteroidetes	c__Bacteroidia	o__Bacteroidales	f__Tannerellaceae	g__Tannerella	s__Tannerella_sp._6_1_58FAA_CT1	0	39	0	46	0	0	0	0	0	23	0	0	0	0	0	0	0	0	0	0
k__Bacteria	p__Bacteroidetes	c__Bacteroidia	o__Bacteroidales	f__Tannerellaceae	g__Tannerella	s__Tannerella_sp._AF04_6	6	61	0	12	0	0	8	0	0	0	0	0	0	0	0	0	0	0	0	0
k__Bacteria	p__Bacteroidetes	c__Bacteroidia	o__Bacteroidales	f__Tannerellaceae	g__Tannerella	s__Tannerella_sp._CAG_118	0	0	0	0	0	0	0	0	0	3	0	0	0	0	0	0	0	0	0	0
k__Bacteria	p__Bacteroidetes	c__Bacteroidia	o__Bacteroidales	f__Tannerellaceae	g__Tannerella	s__Tannerella_sp._oral_taxon_808	12	859	3	1151	0	0	37	16	0	160	0	0	0	0	0	0	0	0	0	0
k__Bacteria	p__Bacteroidetes	c__Bacteroidia	o__Bacteroidales	f__Tannerellaceae	g__Tannerella	s__Tannerella_sp._oral_taxon_HOT_286	298	18668	47	26599	0	0	1304	4	123	1181	0	0	0	0	0	0	0	0	0	0
k__Bacteria	p__Bacteroidetes	c__Bacteroidia	o__Bacteroidales	f__Tannerellaceae	g__Tannerella	s__Unclassified	8	729	0	993	0	0	49	0	0	50	0	0	0	0	0	0	0	0	0	0
k__Bacteria	p__Bacteroidetes	c__Bacteroidia	o__Bacteroidales	f__Tannerellaceae	g__Unclassified	s__Unclassified	0	0	0	27	0	0	0	0	0	0	0	0	0	0	0	0	0	0	0	0
k__Bacteria	p__Bacteroidetes	c__Bacteroidia	o__Bacteroidales	f__Unclassified	g__Candidatus_Symbiothrix	s__Candidatus_Symbiothrix_dinenymphae	15	54	0	112	0	0	9	0	0	16	0	0	0	0	0	0	0	0	0	0
k__Bacteria	p__Bacteroidetes	c__Bacteroidia	o__Bacteroidales	f__Unclassified	g__Unclassified	s__Bacteroidales_bacterium	0	9	0	503	0	0	0	0	0	3	0	0	0	0	0	0	0	0	0	0
k__Bacteria	p__Bacteroidetes	c__Bacteroidia	o__Bacteroidales	f__Unclassified	g__Unclassified	s__Bacteroidales_bacterium_36_12	0	0	0	24	0	0	0	0	0	0	0	0	0	0	0	0	0	0	0	0
k__Bacteria	p__Bacteroidetes	c__Bacteroidia	o__Bacteroidales	f__Unclassified	g__Unclassified	s__Bacteroidales_bacterium_43_36	0	0	0	0	0	0	0	0	0	5	0	0	0	0	0	0	0	0	0	0
k__Bacteria	p__Bacteroidetes	c__Bacteroidia	o__Bacteroidales	f__Unclassified	g__Unclassified	s__Bacteroidales_bacterium_43_8	0	24	0	39	0	0	0	0	0	0	0	0	0	0	0	0	0	0	0	0
k__Bacteria	p__Bacteroidetes	c__Bacteroidia	o__Bacteroidales	f__Unclassified	g__Unclassified	s__Bacteroidales_bacterium_45_6	0	0	0	23	0	0	0	0	0	0	0	0	0	0	0	0	0	0	0	0
k__Bacteria	p__Bacteroidetes	c__Bacteroidia	o__Bacteroidales	f__Unclassified	g__Unclassified	s__Bacteroidales_bacterium_52_46	0	4	0	0	0	0	0	0	0	0	0	0	0	0	0	0	0	0	0	0
k__Bacteria	p__Bacteroidetes	c__Bacteroidia	o__Bacteroidales	f__Unclassified	g__Unclassified	s__Bacteroidales_bacterium_55_9	0	0	0	11	0	0	0	0	0	0	0	0	0	0	0	0	0	0	0	0
k__Bacteria	p__Bacteroidetes	c__Bacteroidia	o__Bacteroidales	f__Unclassified	g__Unclassified	s__Bacteroidales_bacterium_6E	0	0	0	23	0	0	0	0	0	0	0	0	0	0	0	0	0	0	0	0
k__Bacteria	p__Bacteroidetes	c__Bacteroidia	o__Bacteroidales	f__Unclassified	g__Unclassified	s__Bacteroidales_bacterium_Barb4	0	4	4	8	0	0	0	0	0	0	0	0	0	0	0	0	0	0	0	0
k__Bacteria	p__Bacteroidetes	c__Bacteroidia	o__Bacteroidales	f__Unclassified	g__Unclassified	s__Bacteroidales_bacterium_Barb6	0	0	0	22	0	0	0	0	0	0	0	0	0	0	0	0	0	0	0	0
k__Bacteria	p__Bacteroidetes	c__Bacteroidia	o__Bacteroidales	f__Unclassified	g__Unclassified	s__Bacteroidales_bacterium_Barb6XT	0	5	0	5	0	0	0	0	0	0	0	0	0	0	0	0	0	0	0	0
k__Bacteria	p__Bacteroidetes	c__Bacteroidia	o__Bacteroidales	f__Unclassified	g__Unclassified	s__Bacteroidales_bacterium_Barb7	0	108	0	0	0	0	0	0	6	27	0	0	0	0	0	0	0	0	0	0
k__Bacteria	p__Bacteroidetes	c__Bacteroidia	o__Bacteroidales	f__Unclassified	g__Unclassified	s__Bacteroidales_bacterium_CF	0	0	0	0	0	0	0	0	3	0	0	0	0	0	0	0	0	0	0	0
k__Bacteria	p__Bacteroidetes	c__Bacteroidia	o__Bacteroidales	f__Unclassified	g__Unclassified	s__Bacteroidales_bacterium_KA00251	0	57	0	52	0	0	4	0	5	17	0	0	0	0	0	0	0	0	0	0
k__Bacteria	p__Bacteroidetes	c__Bacteroidia	o__Bacteroidales	f__Unclassified	g__Unclassified	s__Bacteroidales_bacterium_KA00344	134	682	3	204	0	0	14	0	12	208	0	0	0	0	0	0	0	0	0	0
k__Bacteria	p__Bacteroidetes	c__Bacteroidia	o__Bacteroidales	f__Unclassified	g__Unclassified	s__Bacteroidales_bacterium_KHT7	5	81	0	42	0	0	23	0	0	47	0	0	0	0	0	0	0	0	0	0
k__Bacteria	p__Bacteroidetes	c__Bacteroidia	o__Bacteroidales	f__Unclassified	g__Unclassified	s__Bacteroidales_bacterium_WCE2004	0	0	0	24	0	0	0	0	0	0	0	0	0	0	0	0	0	0	0	0
k__Bacteria	p__Bacteroidetes	c__Bacteroidia	o__Bacteroidales	f__Unclassified	g__Unclassified	s__Bacteroidales_bacterium_WCE2008	0	11	0	11	0	0	0	0	3	0	0	0	0	0	0	0	0	0	0	0
k__Bacteria	p__Bacteroidetes	c__Bacteroidia	o__Bacteroidales	f__Unclassified	g__Unclassified	s__Unclassified	4067	10997	521	7821	0	555	1791	29	1054	7120	0	0	0	0	0	0	0	0	0	0
k__Bacteria	p__Bacteroidetes	c__Bacteroidia	o__Bacteroidales	f__Williamwhitmaniaceae	g__Williamwhitmania	s__Williamwhitmania_taraxaci	0	3	0	214	0	0	0	0	0	3	0	0	0	0	0	0	0	0	0	0
k__Bacteria	p__Bacteroidetes	c__Bacteroidia	o__Marinilabiliales	f__Marinifilaceae	g__Ancylomarina	s__Ancylomarina_euxinus	0	4	0	12	0	0	0	0	0	0	0	0	0	0	0	0	0	0	0	0
k__Bacteria	p__Bacteroidetes	c__Bacteroidia	o__Marinilabiliales	f__Marinifilaceae	g__Ancylomarina	s__Ancylomarina_longa	380	0	0	137	0	0	0	0	498	0	0	0	98	91	0	0	40	277	0	351
k__Bacteria	p__Bacteroidetes	c__Bacteroidia	o__Marinilabiliales	f__Marinifilaceae	g__Ancylomarina	s__Ancylomarina_salipaludis	0	0	0	26	0	0	0	0	0	0	0	0	0	0	0	0	0	0	0	0
k__Bacteria	p__Bacteroidetes	c__Bacteroidia	o__Marinilabiliales	f__Marinifilaceae	g__Ancylomarina	s__Ancylomarina_subtilis	0	0	0	13	0	0	0	0	0	0	0	0	0	0	0	0	0	0	0	0
k__Bacteria	p__Bacteroidetes	c__Bacteroidia	o__Marinilabiliales	f__Marinifilaceae	g__Labilibaculum	s__Labilibaculum_antarcticum	0	0	0	27	0	0	0	0	0	0	0	0	0	0	0	0	0	0	0	0
k__Bacteria	p__Bacteroidetes	c__Bacteroidia	o__Marinilabiliales	f__Marinifilaceae	g__Labilibaculum	s__Labilibaculum_euxinus	0	0	0	25	0	0	0	0	0	0	0	0	0	0	0	0	0	0	0	0
k__Bacteria	p__Bacteroidetes	c__Bacteroidia	o__Marinilabiliales	f__Marinifilaceae	g__Labilibaculum	s__Labilibaculum_manganireducens	0	10	0	0	0	0	0	0	0	0	0	0	0	0	0	0	0	0	0	0
k__Bacteria	p__Bacteroidetes	c__Bacteroidia	o__Marinilabiliales	f__Marinifilaceae	g__Marinifilum	s__Marinifilum_breve	0	0	0	0	0	0	0	0	0	0	0	0	0	0	0	0	0	0	0	0
k__Bacteria	p__Bacteroidetes	c__Bacteroidia	o__Marinilabiliales	f__Marinifilaceae	g__Marinifilum	s__Marinifilum_flexuosum	0	0	0	24	0	0	0	0	0	0	0	0	0	0	0	0	0	0	0	0
k__Bacteria	p__Bacteroidetes	c__Bacteroidia	o__Marinilabiliales	f__Marinifilaceae	g__Marinifilum	s__Marinifilum_fragile	0	0	0	39	0	0	0	0	0	0	0	0	0	0	0	0	0	0	0	0
k__Bacteria	p__Bacteroidetes	c__Bacteroidia	o__Marinilabiliales	f__Marinilabiliaceae	g__Alkaliflexus	s__Alkaliflexus_imshenetskii	0	0	0	48	0	0	0	0	0	0	0	0	0	0	0	0	0	0	0	0
k__Bacteria	p__Bacteroidetes	c__Bacteroidia	o__Marinilabiliales	f__Marinilabiliaceae	g__Anaerophaga	s__Anaerophaga_thermohalophila	0	5	0	0	0	0	0	0	0	0	0	0	0	0	0	0	0	0	0	0
k__Bacteria	p__Bacteroidetes	c__Bacteroidia	o__Marinilabiliales	f__Marinilabiliaceae	g__Breznakibacter	s__Breznakibacter_xylanolyticus	0	0	0	86	0	0	0	0	0	0	0	0	0	0	0	0	0	0	0	0
k__Bacteria	p__Bacteroidetes	c__Bacteroidia	o__Marinilabiliales	f__Marinilabiliaceae	g__Geofilum	s__Geofilum_rhodophaeum	0	0	0	0	0	0	0	0	0	0	0	0	0	0	0	0	0	0	0	0
k__Bacteria	p__Bacteroidetes	c__Bacteroidia	o__Marinilabiliales	f__Marinilabiliaceae	g__Geofilum	s__Geofilum_rubicundum	0	0	0	0	0	0	0	0	0	0	0	0	0	0	0	0	0	0	0	0
k__Bacteria	p__Bacteroidetes	c__Bacteroidia	o__Marinilabiliales	f__Marinilabiliaceae	g__Labilibacter	s__Labilibacter_marinus	0	0	0	18	0	0	0	0	0	0	0	0	0	0	0	0	0	0	0	0
k__Bacteria	p__Bacteroidetes	c__Bacteroidia	o__Marinilabiliales	f__Marinilabiliaceae	g__Marinilabilia	s__Marinilabilia_rubra	0	0	0	0	0	0	0	0	0	3	0	0	0	0	0	0	0	0	0	0
k__Bacteria	p__Bacteroidetes	c__Bacteroidia	o__Marinilabiliales	f__Marinilabiliaceae	g__Marinilabilia	s__Marinilabilia_salmonicolor	0	0	0	31	0	0	0	0	0	0	0	0	0	0	0	0	0	0	0	0
k__Bacteria	p__Bacteroidetes	c__Bacteroidia	o__Marinilabiliales	f__Marinilabiliaceae	g__Saccharicrinis	s__Saccharicrinis_aurantiacus	0	0	0	14	0	0	0	0	0	0	0	0	0	0	0	0	0	0	0	0
k__Bacteria	p__Bacteroidetes	c__Bacteroidia	o__Marinilabiliales	f__Marinilabiliaceae	g__Saccharicrinis	s__Saccharicrinis_fermentans	0	0	0	16	0	0	0	0	0	0	0	0	0	0	0	0	0	0	0	0
k__Bacteria	p__Bacteroidetes	c__Bacteroidia	o__Marinilabiliales	f__Marinilabiliaceae	g__Thermophagus	s__Thermophagus_xiamenensis	0	0	0	35	0	0	0	0	0	0	0	0	0	0	0	0	0	0	0	0
k__Bacteria	p__Bacteroidetes	c__Bacteroidia	o__Marinilabiliales	f__Marinilabiliaceae	g__Unclassified	s__Marinilabiliaceae_bacterium_JC017	0	0	0	62	0	0	0	0	0	0	0	0	0	0	0	0	0	0	0	0
k__Bacteria	p__Bacteroidetes	c__Bacteroidia	o__Marinilabiliales	f__Prolixibacteraceae	g__Draconibacterium	s__Draconibacterium_orientale	0	0	0	21	0	0	0	0	0	0	0	0	0	0	0	0	0	0	0	0
k__Bacteria	p__Bacteroidetes	c__Bacteroidia	o__Marinilabiliales	f__Prolixibacteraceae	g__Mangrovibacterium	s__Mangrovibacterium_diazotrophicum	0	0	0	26	0	0	0	0	0	14	0	0	0	0	0	0	0	0	0	0
k__Bacteria	p__Bacteroidetes	c__Bacteroidia	o__Marinilabiliales	f__Prolixibacteraceae	g__Mangrovibacterium	s__Mangrovibacterium_marinum	0	0	0	0	0	0	0	0	0	0	0	0	0	0	0	0	0	0	0	0
k__Bacteria	p__Bacteroidetes	c__Bacteroidia	o__Marinilabiliales	f__Prolixibacteraceae	g__Maribellus	s__Maribellus_luteus	14	10	0	0	0	0	51	0	0	12	0	0	9	0	0	0	7	0	13	5
k__Bacteria	p__Bacteroidetes	c__Bacteroidia	o__Marinilabiliales	f__Prolixibacteraceae	g__Mariniphaga	s__Mariniphaga_anaerophila	0	5	0	26	0	0	0	0	0	0	0	0	0	0	0	0	0	0	0	0
k__Bacteria	p__Bacteroidetes	c__Bacteroidia	o__Marinilabiliales	f__Prolixibacteraceae	g__Mariniphaga	s__Mariniphaga_sediminis	0	0	0	0	0	5	0	0	7	0	0	0	0	0	0	0	0	0	0	0
k__Bacteria	p__Bacteroidetes	c__Bacteroidia	o__Marinilabiliales	f__Prolixibacteraceae	g__Prolixibacter	s__Prolixibacter_bellariivorans	0	0	0	25	0	0	0	0	0	0	0	0	0	0	0	0	0	0	0	0
k__Bacteria	p__Bacteroidetes	c__Bacteroidia	o__Marinilabiliales	f__Prolixibacteraceae	g__Prolixibacter	s__Prolixibacter_denitrificans	0	0	0	20	0	0	0	0	0	0	0	0	0	0	0	0	0	0	0	0
k__Bacteria	p__Bacteroidetes	c__Bacteroidia	o__Marinilabiliales	f__Prolixibacteraceae	g__Sunxiuqinia	s__Sunxiuqinia_dokdonensis	0	0	0	30	0	0	0	0	0	0	0	0	0	0	0	0	0	0	0	0
k__Bacteria	p__Bacteroidetes	c__Bacteroidia	o__Marinilabiliales	f__Prolixibacteraceae	g__Sunxiuqinia	s__Sunxiuqinia_elliptica	0	0	0	17	0	0	0	0	0	0	0	0	0	0	0	0	0	0	0	0
k__Bacteria	p__Bacteroidetes	c__Bacteroidia	o__Marinilabiliales	f__Prolixibacteraceae	g__Tangfeifania	s__Tangfeifania_diversioriginum	0	0	0	0	0	0	0	0	0	6	0	0	0	0	0	0	0	0	0	0
k__Bacteria	p__Bacteroidetes	c__Bacteroidia	o__Marinilabiliales	f__Unclassified	g__Unclassified	s__Marinilabiliales_bacterium	0	3	0	51	0	0	0	0	0	0	0	0	0	0	0	0	0	0	0	0
k__Bacteria	p__Bacteroidetes	c__Bacteroidia	o__Unclassified	f__Unclassified	g__Unclassified	s__Bacteroidia_bacterium	0	25	0	3296	0	0	0	0	0	13	0	0	0	0	0	0	0	0	0	0
k__Bacteria	p__Bacteroidetes	c__Bacteroidia	o__Unclassified	f__Unclassified	g__Unclassified	s__Bacteroidia_bacterium_43_41	0	60	0	42	0	0	0	0	0	0	0	0	0	0	0	0	0	0	0	0
k__Bacteria	p__Bacteroidetes	c__Bacteroidia	o__Unclassified	f__Unclassified	g__Unclassified	s__Bacteroidia_bacterium_44_10	0	0	0	29	0	0	0	0	0	0	0	0	0	0	0	0	0	0	0	0
k__Bacteria	p__Bacteroidetes	c__Bacteroidia	o__Unclassified	f__Unclassified	g__Unclassified	s__Unclassified	22	5	0	44	0	0	0	0	14	87	0	0	0	0	0	0	0	0	0	0
k__Bacteria	p__Bacteroidetes	c__Chitinophagia	o__Chitinophagales	f__Chitinophagaceae	g__Chitinophaga	s__Chitinophaga_caeni	0	0	0	7	0	0	0	0	0	0	0	0	0	0	0	0	0	0	0	0
k__Bacteria	p__Bacteroidetes	c__Chitinophagia	o__Chitinophagales	f__Chitinophagaceae	g__Chitinophaga	s__Chitinophaga_dinghuensis	0	0	0	4	0	0	0	0	0	0	0	0	0	0	0	0	0	0	0	0
k__Bacteria	p__Bacteroidetes	c__Chitinophagia	o__Chitinophagales	f__Chitinophagaceae	g__Chitinophaga	s__Chitinophaga_ginsengisoli	0	4	0	0	0	0	0	0	0	0	0	0	0	0	0	0	0	0	0	0
k__Bacteria	p__Bacteroidetes	c__Chitinophagia	o__Chitinophagales	f__Chitinophagaceae	g__Chitinophaga	s__Chitinophaga_lutea	0	0	0	0	0	0	0	0	3	0	0	0	0	0	0	0	0	0	0	0
k__Bacteria	p__Bacteroidetes	c__Chitinophagia	o__Chitinophagales	f__Chitinophagaceae	g__Chitinophaga	s__Chitinophaga_niabensis	0	0	0	0	0	0	0	0	0	5	0	0	0	0	0	0	0	0	0	0
k__Bacteria	p__Bacteroidetes	c__Chitinophagia	o__Chitinophagales	f__Chitinophagaceae	g__Chitinophaga	s__Chitinophaga_niastensis	0	0	0	4	0	0	0	0	0	0	0	0	0	0	0	0	0	0	0	0
k__Bacteria	p__Bacteroidetes	c__Chitinophagia	o__Chitinophagales	f__Chitinophagaceae	g__Chitinophaga	s__Chitinophaga_pinensis	0	0	0	0	0	0	0	0	0	30	0	0	0	0	0	0	0	0	0	0
k__Bacteria	p__Bacteroidetes	c__Chitinophagia	o__Chitinophagales	f__Chitinophagaceae	g__Chitinophaga	s__Chitinophaga_rupis	0	0	0	3	0	0	0	0	0	0	0	0	0	0	0	0	0	0	0	0
k__Bacteria	p__Bacteroidetes	c__Chitinophagia	o__Chitinophagales	f__Chitinophagaceae	g__Chitinophaga	s__Chitinophaga_silvisoli	0	0	0	10	0	0	0	0	0	0	0	0	0	0	0	0	0	0	0	0
k__Bacteria	p__Bacteroidetes	c__Chitinophagia	o__Chitinophagales	f__Chitinophagaceae	g__Chitinophaga	s__Chitinophaga_skermanii	0	0	0	33	0	0	0	0	0	0	0	0	0	0	0	0	0	0	0	0
k__Bacteria	p__Bacteroidetes	c__Chitinophagia	o__Chitinophagales	f__Chitinophagaceae	g__Chitinophaga	s__Chitinophaga_sp._S165	0	0	0	0	0	0	0	0	0	0	0	0	0	0	0	0	0	0	0	0
k__Bacteria	p__Bacteroidetes	c__Chitinophagia	o__Chitinophagales	f__Chitinophagaceae	g__Chitinophaga	s__Chitinophaga_sp._YR573	0	0	0	0	0	0	0	0	17	0	0	0	0	0	0	0	0	0	0	0
k__Bacteria	p__Bacteroidetes	c__Chitinophagia	o__Chitinophagales	f__Chitinophagaceae	g__Chitinophaga	s__[Flexibacter]_sp._ATCC_35208	3	0	0	0	0	0	0	0	0	0	0	0	0	0	0	0	0	0	0	0
k__Bacteria	p__Bacteroidetes	c__Chitinophagia	o__Chitinophagales	f__Chitinophagaceae	g__Cnuella	s__Cnuella_takakiae	0	0	0	0	0	0	0	0	4	0	0	0	0	0	0	0	0	0	0	0
k__Bacteria	p__Bacteroidetes	c__Chitinophagia	o__Chitinophagales	f__Chitinophagaceae	g__Ferruginibacter	s__Ferruginibacter_sp._BO_59	0	0	0	3	0	0	0	0	0	8	0	0	0	0	0	0	6	0	6	0
k__Bacteria	p__Bacteroidetes	c__Chitinophagia	o__Chitinophagales	f__Chitinophagaceae	g__Filimonas	s__Filimonas_lacunae	0	0	0	7	0	0	0	0	0	0	0	0	0	0	0	0	0	0	0	0
k__Bacteria	p__Bacteroidetes	c__Chitinophagia	o__Chitinophagales	f__Chitinophagaceae	g__Flavihumibacter	s__Flavihumibacter_petaseus	0	3	0	0	0	0	0	0	0	0	0	0	0	0	0	0	0	0	0	0
k__Bacteria	p__Bacteroidetes	c__Chitinophagia	o__Chitinophagales	f__Chitinophagaceae	g__Niabella	s__Niabella_ginsenosidivorans	0	0	0	0	0	0	0	0	0	40	0	0	0	0	0	0	0	0	0	0
k__Bacteria	p__Bacteroidetes	c__Chitinophagia	o__Chitinophagales	f__Chitinophagaceae	g__Niabella	s__Niabella_soli	0	0	0	74	0	0	0	0	0	0	0	0	0	0	0	0	0	0	0	0
k__Bacteria	p__Bacteroidetes	c__Chitinophagia	o__Chitinophagales	f__Chitinophagaceae	g__Niastella	s__Niastella_koreensis	0	0	0	0	0	0	0	0	0	0	0	0	0	0	0	0	0	0	0	0
k__Bacteria	p__Bacteroidetes	c__Chitinophagia	o__Chitinophagales	f__Chitinophagaceae	g__Paraflavitalea	s__Paraflavitalea_soli	0	0	0	8	0	0	0	0	0	0	0	0	0	0	0	0	0	0	0	0
k__Bacteria	p__Bacteroidetes	c__Chitinophagia	o__Chitinophagales	f__Chitinophagaceae	g__Pseudoflavitalea	s__Pseudoflavitalea_rhizosphaerae	0	0	0	0	0	0	0	0	0	4	0	0	0	0	0	0	0	0	0	0
k__Bacteria	p__Bacteroidetes	c__Chitinophagia	o__Chitinophagales	f__Chitinophagaceae	g__Taibaiella	s__Taibaiella_soli	0	0	0	0	0	0	0	0	0	7	0	0	0	0	0	0	0	0	0	0
k__Bacteria	p__Bacteroidetes	c__Chitinophagia	o__Chitinophagales	f__Chitinophagaceae	g__Terrimonas	s__Terrimonas_ferruginea	0	0	0	0	0	0	0	0	0	0	0	0	0	0	0	0	0	0	0	0
k__Bacteria	p__Bacteroidetes	c__Chitinophagia	o__Chitinophagales	f__Chitinophagaceae	g__Thermoflavifilum	s__Thermoflavifilum_thermophilum	0	0	0	0	0	0	0	0	3	0	0	0	0	0	0	0	0	0	0	0
k__Bacteria	p__Bacteroidetes	c__Chitinophagia	o__Chitinophagales	f__Chitinophagaceae	g__Unclassified	s__Chitinophagaceae_bacterium	0	44	0	0	0	0	0	0	14	8	0	0	0	0	0	0	0	0	0	4
k__Bacteria	p__Bacteroidetes	c__Cytophagia	o__Cytophagales	f__Amoebophilaceae	g__Candidatus_Amoebophilus	s__Candidatus_Amoebophilus_sp._36_38	2	0	0	0	0	0	0	0	0	0	0	0	0	0	8	132	0	0	9	0
k__Bacteria	p__Bacteroidetes	c__Cytophagia	o__Cytophagales	f__Amoebophilaceae	g__Candidatus_Cardinium	s__Candidatus_Cardinium_hertigii	0	0	0	0	0	0	0	0	0	0	0	0	0	0	0	17	0	0	0	0
k__Bacteria	p__Bacteroidetes	c__Cytophagia	o__Cytophagales	f__Bernardetiaceae	g__Bernardetia	s__Bernardetia_litoralis	0	0	0	16	0	0	0	0	0	0	0	0	0	0	0	0	0	0	0	0
k__Bacteria	p__Bacteroidetes	c__Cytophagia	o__Cytophagales	f__Bernardetiaceae	g__Hugenholtzia	s__Hugenholtzia_roseola	0	0	0	19	0	0	0	0	0	0	0	0	0	0	0	0	0	0	0	0
k__Bacteria	p__Bacteroidetes	c__Cytophagia	o__Cytophagales	f__Catalimonadaceae	g__Catalinimonas	s__Catalinimonas_alkaloidigena	0	0	0	0	0	0	0	0	0	3	0	0	0	0	0	0	9	0	0	0
k__Bacteria	p__Bacteroidetes	c__Cytophagia	o__Cytophagales	f__Cesiribacteraceae	g__Cesiribacter	s__Cesiribacter_andamanensis	0	3	0	0	0	0	0	0	0	0	0	0	0	0	0	0	0	0	0	0
k__Bacteria	p__Bacteroidetes	c__Cytophagia	o__Cytophagales	f__Cesiribacteraceae	g__Nafulsella	s__Nafulsella_turpanensis	0	0	0	18	0	0	0	0	0	0	0	0	0	0	0	0	0	0	0	0
k__Bacteria	p__Bacteroidetes	c__Cytophagia	o__Cytophagales	f__Cyclobacteriaceae	g__Algoriphagus	s__Algoriphagus_antarcticus	0	0	0	8	0	0	0	0	0	0	0	0	0	0	0	0	0	0	0	0
k__Bacteria	p__Bacteroidetes	c__Cytophagia	o__Cytophagales	f__Cyclobacteriaceae	g__Algoriphagus	s__Algoriphagus_aquaeductus	0	0	0	6	0	0	0	0	4	0	0	0	0	0	0	0	0	0	0	0
k__Bacteria	p__Bacteroidetes	c__Cytophagia	o__Cytophagales	f__Cyclobacteriaceae	g__Algoriphagus	s__Algoriphagus_litoralis	0	0	0	0	0	0	0	4	5	0	0	0	46	0	0	0	0	0	0	0
k__Bacteria	p__Bacteroidetes	c__Cytophagia	o__Cytophagales	f__Cyclobacteriaceae	g__Algoriphagus	s__Algoriphagus_locisalis	0	0	0	0	0	0	0	0	0	0	0	0	0	0	0	0	0	0	0	0
k__Bacteria	p__Bacteroidetes	c__Cytophagia	o__Cytophagales	f__Cyclobacteriaceae	g__Algoriphagus	s__Algoriphagus_ornithinivorans	0	0	0	19	0	0	0	0	0	0	0	0	0	0	0	0	0	0	0	0
k__Bacteria	p__Bacteroidetes	c__Cytophagia	o__Cytophagales	f__Cyclobacteriaceae	g__Aquiflexum	s__Aquiflexum_balticum	0	0	0	21	0	0	0	0	0	0	0	0	0	0	0	0	0	0	0	0
k__Bacteria	p__Bacteroidetes	c__Cytophagia	o__Cytophagales	f__Cyclobacteriaceae	g__Cecembia	s__Cecembia_rubra	0	0	0	0	0	0	5	0	0	0	0	0	0	0	0	0	0	0	0	0
k__Bacteria	p__Bacteroidetes	c__Cytophagia	o__Cytophagales	f__Cyclobacteriaceae	g__Echinicola	s__Echinicola_pacifica	0	15	0	0	0	0	0	0	0	0	0	0	0	0	0	0	0	0	0	0
k__Bacteria	p__Bacteroidetes	c__Cytophagia	o__Cytophagales	f__Cyclobacteriaceae	g__Echinicola	s__Echinicola_strongylocentroti	0	0	0	0	0	0	0	0	0	0	0	0	0	0	0	0	0	0	0	0
k__Bacteria	p__Bacteroidetes	c__Cytophagia	o__Cytophagales	f__Cyclobacteriaceae	g__Echinicola	s__Echinicola_vietnamensis	0	0	0	0	0	0	0	0	0	0	0	0	0	0	0	0	0	0	0	0
k__Bacteria	p__Bacteroidetes	c__Cytophagia	o__Cytophagales	f__Cyclobacteriaceae	g__Mariniradius	s__Mariniradius_saccharolyticus	0	0	0	0	0	0	0	0	0	0	0	0	0	0	0	0	0	0	0	0
k__Bacteria	p__Bacteroidetes	c__Cytophagia	o__Cytophagales	f__Cyclobacteriaceae	g__Negadavirga	s__Negadavirga_sp._SW125	0	0	0	0	0	0	6	0	0	0	0	0	0	0	0	0	0	0	0	0
k__Bacteria	p__Bacteroidetes	c__Cytophagia	o__Cytophagales	f__Cyclobacteriaceae	g__Unclassified	s__Unclassified	0	0	0	8	0	0	0	0	0	0	0	0	0	0	0	0	0	0	0	0
k__Bacteria	p__Bacteroidetes	c__Cytophagia	o__Cytophagales	f__Cytophagaceae	g__Candidatus_Nephrothrix	s__Candidatus_Nephrothrix_sp._EaCA	0	8	0	0	0	5	0	0	38	0	0	0	0	0	19	0	0	0	0	0
k__Bacteria	p__Bacteroidetes	c__Cytophagia	o__Cytophagales	f__Cytophagaceae	g__Chryseotalea	s__Chryseotalea_sanaruensis	0	0	0	3	0	0	0	0	0	0	0	0	0	0	0	0	0	0	0	0
k__Bacteria	p__Bacteroidetes	c__Cytophagia	o__Cytophagales	f__Cytophagaceae	g__Cytophaga	s__Cytophaga_aurantiaca	0	0	0	18	0	0	0	0	0	0	0	0	0	0	0	0	0	0	0	0
k__Bacteria	p__Bacteroidetes	c__Cytophagia	o__Cytophagales	f__Cytophagaceae	g__Rhodonellum	s__Unclassified	0	0	0	3	0	0	0	0	0	0	0	0	0	0	0	0	0	0	0	0
k__Bacteria	p__Bacteroidetes	c__Cytophagia	o__Cytophagales	f__Cytophagaceae	g__Spirosoma	s__Spirosoma_endophyticum	4	0	0	18	0	0	0	0	1	0	0	0	0	0	0	0	0	0	0	0
k__Bacteria	p__Bacteroidetes	c__Cytophagia	o__Cytophagales	f__Cytophagaceae	g__Spirosoma	s__Spirosoma_montaniterrae	9	0	0	12	0	0	0	0	5	0	0	0	0	0	0	0	0	0	0	0
k__Bacteria	p__Bacteroidetes	c__Cytophagia	o__Cytophagales	f__Cytophagaceae	g__Spirosoma	s__Spirosoma_oryzae	0	0	0	0	0	0	0	0	0	10	0	0	0	0	0	0	0	0	0	0
k__Bacteria	p__Bacteroidetes	c__Cytophagia	o__Cytophagales	f__Cytophagaceae	g__Spirosoma	s__Spirosoma_pollinicola	0	0	0	0	0	0	0	0	3	0	0	0	0	0	0	0	0	0	0	0
k__Bacteria	p__Bacteroidetes	c__Cytophagia	o__Cytophagales	f__Cytophagaceae	g__Spirosoma	s__Spirosoma_sp._48_14	0	0	0	29	0	0	0	0	0	0	0	0	0	0	0	0	0	0	0	0
k__Bacteria	p__Bacteroidetes	c__Cytophagia	o__Cytophagales	f__Cytophagaceae	g__Unclassified	s__Cytophagaceae_bacterium_FSY_15	0	0	0	6	0	0	0	0	0	0	0	0	0	0	0	0	0	0	0	0
k__Bacteria	p__Bacteroidetes	c__Cytophagia	o__Cytophagales	f__Cytophagaceae	g__Unclassified	s__marine_bacterium_AO1_C	0	0	0	0	0	0	0	0	7	0	0	0	0	0	0	0	0	0	0	0
k__Bacteria	p__Bacteroidetes	c__Cytophagia	o__Cytophagales	f__Flammeovirgaceae	g__Flammeovirga	s__Flammeovirga_pectinis	0	0	0	6	0	0	0	0	0	0	0	0	0	0	0	0	0	0	0	0
k__Bacteria	p__Bacteroidetes	c__Cytophagia	o__Cytophagales	f__Flammeovirgaceae	g__Flammeovirga	s__Flammeovirga_sp._OC4	0	0	0	0	0	0	72	0	0	0	0	0	0	0	0	0	0	0	0	0
k__Bacteria	p__Bacteroidetes	c__Cytophagia	o__Cytophagales	f__Flammeovirgaceae	g__Flexithrix	s__Flexithrix_dorotheae	0	0	0	7	0	0	0	0	0	0	0	0	0	0	0	0	0	0	0	0
k__Bacteria	p__Bacteroidetes	c__Cytophagia	o__Cytophagales	f__Flammeovirgaceae	g__Sediminitomix	s__Sediminitomix_flava	0	0	0	0	0	0	0	0	0	0	0	0	0	0	0	0	0	0	0	0
k__Bacteria	p__Bacteroidetes	c__Cytophagia	o__Cytophagales	f__Flexibacteraceae	g__Flexibacter	s__Flexibacter_flexilis	0	0	0	26	0	0	0	0	3	0	0	0	0	0	0	0	0	0	0	0
k__Bacteria	p__Bacteroidetes	c__Cytophagia	o__Cytophagales	f__Fulvivirgaceae	g__Chryseolinea	s__Chryseolinea_flava	0	3	0	0	0	0	0	0	0	0	0	0	0	0	0	0	0	0	0	0
k__Bacteria	p__Bacteroidetes	c__Cytophagia	o__Cytophagales	f__Fulvivirgaceae	g__Chryseolinea	s__Chryseolinea_serpens	0	0	0	5	0	0	0	0	0	0	0	0	0	0	0	0	0	0	0	0
k__Bacteria	p__Bacteroidetes	c__Cytophagia	o__Cytophagales	f__Fulvivirgaceae	g__Chryseolinea	s__Chryseolinea_soli	8	25	0	0	0	0	0	0	0	10	0	0	0	0	0	0	0	0	0	0
k__Bacteria	p__Bacteroidetes	c__Cytophagia	o__Cytophagales	f__Fulvivirgaceae	g__Fulvivirga	s__Fulvivirga_imtechensis	0	0	0	16	0	0	0	0	0	0	0	0	0	0	0	0	3	0	0	0
k__Bacteria	p__Bacteroidetes	c__Cytophagia	o__Cytophagales	f__Fulvivirgaceae	g__Ohtaekwangia	s__Ohtaekwangia_koreensis	0	0	0	0	0	0	0	0	0	0	0	0	0	0	0	0	0	0	0	0
k__Bacteria	p__Bacteroidetes	c__Cytophagia	o__Cytophagales	f__Hymenobacteraceae	g__Adhaeribacter	s__Adhaeribacter_aquaticus	0	0	0	0	0	0	0	0	3	0	0	0	0	0	0	0	0	0	0	0
k__Bacteria	p__Bacteroidetes	c__Cytophagia	o__Cytophagales	f__Hymenobacteraceae	g__Botryobacter	s__Botryobacter_ruber	0	0	0	9	0	0	0	0	0	0	0	0	0	0	0	0	0	0	0	0
k__Bacteria	p__Bacteroidetes	c__Cytophagia	o__Cytophagales	f__Hymenobacteraceae	g__Hymenobacter	s__Hymenobacter_coccineus	0	0	0	21	0	0	0	0	0	0	0	0	0	0	0	0	0	0	0	0
k__Bacteria	p__Bacteroidetes	c__Cytophagia	o__Cytophagales	f__Hymenobacteraceae	g__Hymenobacter	s__Hymenobacter_metallilatus	0	0	0	5	0	0	0	0	0	0	0	0	0	0	0	0	0	0	0	0
k__Bacteria	p__Bacteroidetes	c__Cytophagia	o__Cytophagales	f__Hymenobacteraceae	g__Hymenobacter	s__Hymenobacter_mucosus	0	0	0	14	0	0	0	0	0	3	0	0	0	0	0	0	0	0	0	0
k__Bacteria	p__Bacteroidetes	c__Cytophagia	o__Cytophagales	f__Hymenobacteraceae	g__Hymenobacter	s__Hymenobacter_oligotrophus	0	0	0	22	0	0	0	0	0	0	0	0	0	0	0	0	0	0	0	0
k__Bacteria	p__Bacteroidetes	c__Cytophagia	o__Cytophagales	f__Hymenobacteraceae	g__Hymenobacter	s__Hymenobacter_sp.	0	6	0	0	0	0	0	0	0	0	0	0	0	0	0	0	0	0	0	0
k__Bacteria	p__Bacteroidetes	c__Cytophagia	o__Cytophagales	f__Hymenobacteraceae	g__Hymenobacter	s__Hymenobacter_sp._PAMC_26628	0	0	0	21	0	0	0	0	0	0	0	0	0	0	0	0	0	0	0	0
k__Bacteria	p__Bacteroidetes	c__Cytophagia	o__Cytophagales	f__Hymenobacteraceae	g__Pontibacter	s__Pontibacter_korlensis	0	0	0	0	0	0	0	0	0	0	0	0	0	0	0	0	3	0	5	0
k__Bacteria	p__Bacteroidetes	c__Cytophagia	o__Cytophagales	f__Marivirgaceae	g__Marivirga	s__Marivirga_lumbricoides	0	58	10	46	0	194	18	13	41	35	0	15	10	5	24	0	59	24	28	15
k__Bacteria	p__Bacteroidetes	c__Cytophagia	o__Cytophagales	f__Microscillaceae	g__Eisenibacter	s__Eisenibacter_elegans	0	0	0	11	0	0	0	0	0	0	0	0	0	0	0	0	0	0	0	0
k__Bacteria	p__Bacteroidetes	c__Cytophagia	o__Cytophagales	f__Microscillaceae	g__Microscilla	s__Microscilla_marina	0	0	0	20	0	0	0	0	0	0	0	0	0	0	0	0	0	0	0	0
k__Bacteria	p__Bacteroidetes	c__Cytophagia	o__Cytophagales	f__Persicobacteraceae	g__Persicobacter	s__Persicobacter_sp._CCB_QB2	0	0	0	45	0	0	0	0	0	0	0	0	0	0	0	0	0	0	0	0
k__Bacteria	p__Bacteroidetes	c__Cytophagia	o__Cytophagales	f__Persicobacteraceae	g__Persicobacter	s__Persicobacter_sp._JZB09	0	0	0	17	0	0	0	0	0	0	0	0	0	0	0	0	0	0	0	0
k__Bacteria	p__Bacteroidetes	c__Cytophagia	o__Cytophagales	f__Raineyaceae	g__Raineya	s__Raineya_orbicola	0	0	4	0	0	0	0	0	0	0	0	0	0	0	0	0	0	0	0	0
k__Bacteria	p__Bacteroidetes	c__Cytophagia	o__Cytophagales	f__Reichenbachiellaceae	g__Reichenbachiella	s__Reichenbachiella_agariperforans	0	0	0	6	0	0	0	0	0	0	0	0	0	0	0	0	0	0	0	0
k__Bacteria	p__Bacteroidetes	c__Cytophagia	o__Cytophagales	f__Reichenbachiellaceae	g__Reichenbachiella	s__Reichenbachiella_sp._5M10	0	0	0	18	0	0	0	0	0	0	0	0	0	0	0	0	0	0	0	0
k__Bacteria	p__Bacteroidetes	c__Cytophagia	o__Cytophagales	f__Reichenbachiellaceae	g__Reichenbachiella	s__Reichenbachiella_sp._MSK19_1	0	42	0	0	0	0	0	0	0	0	0	0	0	0	0	0	0	0	0	0
k__Bacteria	p__Bacteroidetes	c__Cytophagia	o__Cytophagales	f__Reichenbachiellaceae	g__Reichenbachiella	s__Reichenbachiella_versicolor	0	0	0	24	0	0	0	0	0	0	0	0	0	0	0	0	0	0	0	0
k__Bacteria	p__Bacteroidetes	c__Cytophagia	o__Cytophagales	f__Roseivirgaceae	g__Roseivirga	s__Roseivirga_misakiensis	0	0	0	0	0	0	0	0	3	8	0	0	0	0	0	0	0	0	0	0
k__Bacteria	p__Bacteroidetes	c__Cytophagia	o__Cytophagales	f__Spirosomaceae	g__Dyadobacter	s__Dyadobacter_alkalitolerans	0	0	0	6	0	0	0	0	0	0	0	0	0	0	0	0	0	0	0	0
k__Bacteria	p__Bacteroidetes	c__Cytophagia	o__Cytophagales	f__Spirosomaceae	g__Dyadobacter	s__Dyadobacter_fermentans	0	0	0	21	0	0	0	0	0	0	0	0	0	0	0	0	0	0	0	0
k__Bacteria	p__Bacteroidetes	c__Cytophagia	o__Cytophagales	f__Spirosomaceae	g__Dyadobacter	s__Dyadobacter_jejuensis	5	0	0	32	0	0	0	0	0	26	0	0	0	0	0	0	0	0	0	0
k__Bacteria	p__Bacteroidetes	c__Cytophagia	o__Cytophagales	f__Spirosomaceae	g__Dyadobacter	s__Dyadobacter_jiangsuensis	0	0	0	0	0	0	0	0	0	5	0	0	0	0	0	0	0	0	0	0
k__Bacteria	p__Bacteroidetes	c__Cytophagia	o__Cytophagales	f__Spirosomaceae	g__Dyadobacter	s__Dyadobacter_tibetensis	0	0	0	0	0	0	0	0	0	0	0	0	0	3	0	0	0	0	0	0
k__Bacteria	p__Bacteroidetes	c__Cytophagia	o__Cytophagales	f__Spirosomaceae	g__Emticicia	s__Emticicia_oligotrophica	0	0	0	0	0	0	0	0	3	0	0	0	0	0	0	0	0	0	0	0
k__Bacteria	p__Bacteroidetes	c__Cytophagia	o__Cytophagales	f__Spirosomaceae	g__Fibrella	s__Fibrella_aestuarina	4	39	0	39	0	0	0	0	0	0	0	0	0	0	0	0	0	0	0	0
k__Bacteria	p__Bacteroidetes	c__Cytophagia	o__Cytophagales	f__Spirosomaceae	g__Fibrisoma	s__Fibrisoma_montanum	0	7	0	0	0	0	0	0	0	0	0	0	0	0	0	0	0	0	0	0
k__Bacteria	p__Bacteroidetes	c__Cytophagia	o__Cytophagales	f__Spirosomaceae	g__Larkinella	s__Larkinella_arboricola	0	0	0	0	0	0	0	0	0	8	0	0	0	0	0	0	0	0	0	0
k__Bacteria	p__Bacteroidetes	c__Cytophagia	o__Cytophagales	f__Spirosomaceae	g__Larkinella	s__Larkinella_knui	0	0	0	9	0	0	0	0	0	0	0	0	0	0	0	0	0	0	0	0
k__Bacteria	p__Bacteroidetes	c__Cytophagia	o__Cytophagales	f__Spirosomaceae	g__Larkinella	s__Larkinella_punicea	0	0	0	43	0	0	0	0	0	0	0	0	0	0	0	0	0	0	0	0
k__Bacteria	p__Bacteroidetes	c__Cytophagia	o__Cytophagales	f__Spirosomaceae	g__Larkinella	s__Larkinella_soli	0	0	0	0	0	0	0	0	0	0	0	0	0	0	0	0	0	0	0	0
k__Bacteria	p__Bacteroidetes	c__Cytophagia	o__Cytophagales	f__Spirosomaceae	g__Pseudarcicella	s__Pseudarcicella_hirudinis	0	0	0	0	0	0	0	48	0	0	0	0	0	0	0	0	0	0	0	0
k__Bacteria	p__Bacteroidetes	c__Cytophagia	o__Cytophagales	f__Spirosomaceae	g__Runella	s__Runella_rosea	0	0	0	0	0	0	0	0	0	5	0	0	0	0	0	0	0	0	0	0
k__Bacteria	p__Bacteroidetes	c__Cytophagia	o__Cytophagales	f__Spirosomaceae	g__Runella	s__Runella_slithyformis	8	0	0	0	0	0	0	0	0	0	0	0	0	0	0	0	0	0	0	0
k__Bacteria	p__Bacteroidetes	c__Cytophagia	o__Cytophagales	f__Spirosomaceae	g__Runella	s__Runella_sp._SP2	0	0	0	32	0	0	0	0	0	0	0	0	0	0	0	0	0	0	0	0
k__Bacteria	p__Bacteroidetes	c__Cytophagia	o__Cytophagales	f__Thermoflexibacteraceae	g__Thermoflexibacter	s__Thermoflexibacter_ruber	0	0	0	18	0	0	0	0	0	0	0	0	0	0	0	0	0	0	0	0
k__Bacteria	p__Bacteroidetes	c__Cytophagia	o__Cytophagales	f__Thermonemataceae	g__Thermonema	s__Thermonema_rossianum	0	0	0	48	0	0	0	0	0	0	0	0	0	0	0	0	0	0	0	0
k__Bacteria	p__Bacteroidetes	c__Cytophagia	o__Cytophagales	f__Unclassified	g__Unclassified	s__Cytophagales_bacterium	8	52	0	42	0	0	0	0	0	9	0	0	0	0	0	0	0	0	0	0
k__Bacteria	p__Bacteroidetes	c__Flavobacteriia	o__Flavobacteriales	f__Crocinitomicaceae	g__Brumimicrobium	s__Brumimicrobium_sp._C305	0	0	0	8	0	0	0	0	0	0	0	0	0	0	0	0	0	0	0	0
k__Bacteria	p__Bacteroidetes	c__Flavobacteriia	o__Flavobacteriales	f__Crocinitomicaceae	g__Fluviicola	s__Fluviicola_sp.	0	0	5	24	0	0	0	0	60	0	0	0	0	0	0	0	0	0	0	0
k__Bacteria	p__Bacteroidetes	c__Flavobacteriia	o__Flavobacteriales	f__Crocinitomicaceae	g__Fluviicola	s__Fluviicola_taffensis	0	0	0	0	0	0	0	0	20	0	0	0	0	0	0	0	0	0	0	0
k__Bacteria	p__Bacteroidetes	c__Flavobacteriia	o__Flavobacteriales	f__Crocinitomicaceae	g__Lishizhenia	s__Lishizhenia_tianjinensis	0	0	0	24	0	0	0	0	0	0	0	0	0	0	0	0	0	0	0	0
k__Bacteria	p__Bacteroidetes	c__Flavobacteriia	o__Flavobacteriales	f__Crocinitomicaceae	g__Unclassified	s__Crocinitomicaceae_bacterium_TMED135	5	4	0	0	0	0	0	0	0	0	0	0	0	0	0	0	0	0	0	0
k__Bacteria	p__Bacteroidetes	c__Flavobacteriia	o__Flavobacteriales	f__Cryomorphaceae	g__Unclassified	s__Cryomorphaceae_bacterium_BACL21_MAG_121220_bin10	0	0	0	0	0	0	0	0	0	0	0	0	0	0	0	0	0	0	0	0
k__Bacteria	p__Bacteroidetes	c__Flavobacteriia	o__Flavobacteriales	f__Flavobacteriaceae	g__Aequorivita	s__Aequorivita_antarctica	0	0	0	19	0	0	0	0	0	0	0	0	0	0	0	0	0	0	0	0
k__Bacteria	p__Bacteroidetes	c__Flavobacteriia	o__Flavobacteriales	f__Flavobacteriaceae	g__Aequorivita	s__Aequorivita_sp.	0	0	0	0	0	0	0	0	0	0	0	0	0	0	0	0	0	0	0	0
k__Bacteria	p__Bacteroidetes	c__Flavobacteriia	o__Flavobacteriales	f__Flavobacteriaceae	g__Aequorivita	s__Aequorivita_sp._H23M31	0	0	0	3	0	0	0	0	0	0	0	0	0	0	0	0	0	0	0	0
k__Bacteria	p__Bacteroidetes	c__Flavobacteriia	o__Flavobacteriales	f__Flavobacteriaceae	g__Algibacter	s__Algibacter_alginicilyticus	0	0	0	4	0	0	0	0	0	0	0	0	0	0	0	0	0	0	0	0
k__Bacteria	p__Bacteroidetes	c__Flavobacteriia	o__Flavobacteriales	f__Flavobacteriaceae	g__Amniculibacterium	s__Amniculibacterium_aquaticum	0	0	0	0	0	0	0	0	0	33	0	0	0	0	0	0	0	0	0	0
k__Bacteria	p__Bacteroidetes	c__Flavobacteriia	o__Flavobacteriales	f__Flavobacteriaceae	g__Aquimarina	s__Aquimarina_amphilecti	3	0	0	0	0	0	0	0	0	0	0	0	0	0	0	0	0	0	0	0
k__Bacteria	p__Bacteroidetes	c__Flavobacteriia	o__Flavobacteriales	f__Flavobacteriaceae	g__Aquimarina	s__Aquimarina_atlantica	0	0	0	44	0	0	0	0	0	0	0	0	0	0	0	0	0	0	0	0
k__Bacteria	p__Bacteroidetes	c__Flavobacteriia	o__Flavobacteriales	f__Flavobacteriaceae	g__Aquimarina	s__Aquimarina_macrocephali	0	0	0	4	0	0	0	0	0	0	0	0	0	0	0	0	0	0	0	0
k__Bacteria	p__Bacteroidetes	c__Flavobacteriia	o__Flavobacteriales	f__Flavobacteriaceae	g__Aquimarina	s__Aquimarina_pacifica	0	0	0	0	0	0	3	0	0	0	0	0	0	0	0	0	0	0	0	0
k__Bacteria	p__Bacteroidetes	c__Flavobacteriia	o__Flavobacteriales	f__Flavobacteriaceae	g__Aquimarina	s__Aquimarina_sediminis	0	0	2	0	0	0	0	0	34	0	0	0	0	0	0	0	0	0	0	0
k__Bacteria	p__Bacteroidetes	c__Flavobacteriia	o__Flavobacteriales	f__Flavobacteriaceae	g__Aquimarina	s__Aquimarina_sp._AU119	0	0	0	15	0	0	0	0	0	0	0	0	0	0	0	0	0	0	0	0
k__Bacteria	p__Bacteroidetes	c__Flavobacteriia	o__Flavobacteriales	f__Flavobacteriaceae	g__Aquimarina	s__Unclassified	0	0	0	22	0	0	0	0	0	0	0	0	0	0	0	0	0	0	0	0
k__Bacteria	p__Bacteroidetes	c__Flavobacteriia	o__Flavobacteriales	f__Flavobacteriaceae	g__Arenibacter	s__Arenibacter_algicola	0	38	0	0	0	0	0	0	0	6	0	0	0	0	0	0	0	0	0	0
k__Bacteria	p__Bacteroidetes	c__Flavobacteriia	o__Flavobacteriales	f__Flavobacteriaceae	g__Arenibacter	s__Arenibacter_certesii	0	0	0	0	0	0	0	0	10	0	0	0	0	0	0	0	0	0	0	0
k__Bacteria	p__Bacteroidetes	c__Flavobacteriia	o__Flavobacteriales	f__Flavobacteriaceae	g__Arenibacter	s__Arenibacter_hampyeongensis	0	0	0	0	0	0	0	0	3	0	0	0	0	0	0	0	0	0	0	0
k__Bacteria	p__Bacteroidetes	c__Flavobacteriia	o__Flavobacteriales	f__Flavobacteriaceae	g__Arenibacter	s__Arenibacter_nanhaiticus	0	0	0	0	0	0	0	0	0	0	0	0	0	0	0	0	0	0	0	0
k__Bacteria	p__Bacteroidetes	c__Flavobacteriia	o__Flavobacteriales	f__Flavobacteriaceae	g__Arenibacter	s__Arenibacter_sp._NBRC_103722	3	0	0	0	0	0	0	0	0	0	0	0	0	0	0	0	0	0	0	0
k__Bacteria	p__Bacteroidetes	c__Flavobacteriia	o__Flavobacteriales	f__Flavobacteriaceae	g__Avrilella	s__Avrilella_dinanensis	0	0	0	15	0	0	0	0	0	3	0	0	0	0	0	0	0	0	0	0
k__Bacteria	p__Bacteroidetes	c__Flavobacteriia	o__Flavobacteriales	f__Flavobacteriaceae	g__Bizionia	s__Bizionia_argentinensis	0	0	0	0	0	0	0	0	4	0	0	0	0	0	0	0	0	0	0	0
k__Bacteria	p__Bacteroidetes	c__Flavobacteriia	o__Flavobacteriales	f__Flavobacteriaceae	g__Bizionia	s__Bizionia_paragorgiae	0	0	0	0	0	0	0	0	6	0	0	0	0	0	0	0	0	0	0	0
k__Bacteria	p__Bacteroidetes	c__Flavobacteriia	o__Flavobacteriales	f__Flavobacteriaceae	g__Capnocytophaga	s__Capnocytophaga_canimorsus	7	17	56	70	0	3	4	0	130	69	0	0	0	0	0	0	0	0	0	0
k__Bacteria	p__Bacteroidetes	c__Flavobacteriia	o__Flavobacteriales	f__Flavobacteriaceae	g__Capnocytophaga	s__Capnocytophaga_canis	3	9	19	76	0	0	47	0	28	16	0	0	0	0	0	0	0	0	0	0
k__Bacteria	p__Bacteroidetes	c__Flavobacteriia	o__Flavobacteriales	f__Flavobacteriaceae	g__Capnocytophaga	s__Capnocytophaga_cynodegmi	0	14	0	35	0	0	0	0	264	15	0	0	0	0	0	0	0	0	0	0
k__Bacteria	p__Bacteroidetes	c__Flavobacteriia	o__Flavobacteriales	f__Flavobacteriaceae	g__Capnocytophaga	s__Capnocytophaga_gingivalis	1258	2323	135	7924	0	0	148	0	821	8293	0	0	0	0	0	0	0	0	0	0
k__Bacteria	p__Bacteroidetes	c__Flavobacteriia	o__Flavobacteriales	f__Flavobacteriaceae	g__Capnocytophaga	s__Capnocytophaga_granulosa	50	75	65	1896	0	0	37	3	199	429	0	0	0	0	0	0	0	0	0	0
k__Bacteria	p__Bacteroidetes	c__Flavobacteriia	o__Flavobacteriales	f__Flavobacteriaceae	g__Capnocytophaga	s__Capnocytophaga_haemolytica	5	4	21	134	0	0	17	0	21	106	0	0	0	0	0	0	0	0	0	0
k__Bacteria	p__Bacteroidetes	c__Flavobacteriia	o__Flavobacteriales	f__Flavobacteriaceae	g__Capnocytophaga	s__Capnocytophaga_leadbetteri	1148	3842	860	12545	0	0	4890	3	1463	11621	0	0	0	0	0	0	0	0	0	0
k__Bacteria	p__Bacteroidetes	c__Flavobacteriia	o__Flavobacteriales	f__Flavobacteriaceae	g__Capnocytophaga	s__Capnocytophaga_ochracea	286	2058	223	4644	0	0	312	10	383	1264	0	0	0	0	0	0	0	0	0	0
k__Bacteria	p__Bacteroidetes	c__Flavobacteriia	o__Flavobacteriales	f__Flavobacteriaceae	g__Capnocytophaga	s__Capnocytophaga_sp.	96	247	108	1100	0	0	98	0	312	410	0	0	0	0	0	0	0	0	0	0
k__Bacteria	p__Bacteroidetes	c__Flavobacteriia	o__Flavobacteriales	f__Flavobacteriaceae	g__Capnocytophaga	s__Capnocytophaga_sp._CM59	123	189	164	5072	0	0	215	0	598	370	0	0	0	0	0	0	0	0	0	0
k__Bacteria	p__Bacteroidetes	c__Flavobacteriia	o__Flavobacteriales	f__Flavobacteriaceae	g__Capnocytophaga	s__Capnocytophaga_sp._ChDC_OS43	141	195	14	1413	0	0	82	0	25	219	0	0	0	0	0	0	0	0	0	0
k__Bacteria	p__Bacteroidetes	c__Flavobacteriia	o__Flavobacteriales	f__Flavobacteriaceae	g__Capnocytophaga	s__Capnocytophaga_sp._H2931	34	0	0	28	0	0	0	0	16	0	0	0	0	0	0	0	0	0	0	0
k__Bacteria	p__Bacteroidetes	c__Flavobacteriia	o__Flavobacteriales	f__Flavobacteriaceae	g__Capnocytophaga	s__Capnocytophaga_sp._H4358	0	0	0	83	0	0	0	0	46	0	0	0	0	0	0	0	0	0	0	0
k__Bacteria	p__Bacteroidetes	c__Flavobacteriia	o__Flavobacteriales	f__Flavobacteriaceae	g__Capnocytophaga	s__Capnocytophaga_sp._oral_taxon_323	0	70	4	132	0	0	0	0	43	7	0	0	0	0	0	0	0	0	0	0
k__Bacteria	p__Bacteroidetes	c__Flavobacteriia	o__Flavobacteriales	f__Flavobacteriaceae	g__Capnocytophaga	s__Capnocytophaga_sp._oral_taxon_324	26	115	33	698	0	0	37	0	75	97	0	0	0	0	0	0	0	0	0	0
k__Bacteria	p__Bacteroidetes	c__Flavobacteriia	o__Flavobacteriales	f__Flavobacteriaceae	g__Capnocytophaga	s__Capnocytophaga_sp._oral_taxon_326	805	2735	211	7377	0	0	221	0	185	922	0	0	0	0	0	0	0	0	0	0
k__Bacteria	p__Bacteroidetes	c__Flavobacteriia	o__Flavobacteriales	f__Flavobacteriaceae	g__Capnocytophaga	s__Capnocytophaga_sp._oral_taxon_329	2062	8221	1728	24989	0	0	8593	36	3116	21784	0	0	0	0	0	0	0	0	0	0
k__Bacteria	p__Bacteroidetes	c__Flavobacteriia	o__Flavobacteriales	f__Flavobacteriaceae	g__Capnocytophaga	s__Capnocytophaga_sp._oral_taxon_332	267	722	98	2521	0	6	1454	27	918	2257	0	0	0	0	0	0	0	0	0	0
k__Bacteria	p__Bacteroidetes	c__Flavobacteriia	o__Flavobacteriales	f__Flavobacteriaceae	g__Capnocytophaga	s__Capnocytophaga_sp._oral_taxon_335	7	13	43	164	0	0	43	0	13	78	0	0	0	0	0	0	0	0	0	0
k__Bacteria	p__Bacteroidetes	c__Flavobacteriia	o__Flavobacteriales	f__Flavobacteriaceae	g__Capnocytophaga	s__Capnocytophaga_sp._oral_taxon_336	9	53	27	219	0	0	39	0	0	142	0	0	0	0	0	0	0	0	0	0
k__Bacteria	p__Bacteroidetes	c__Flavobacteriia	o__Flavobacteriales	f__Flavobacteriaceae	g__Capnocytophaga	s__Capnocytophaga_sp._oral_taxon_338	143	7	40	9345	0	0	7	6	335	199	0	0	0	0	0	0	0	0	0	0
k__Bacteria	p__Bacteroidetes	c__Flavobacteriia	o__Flavobacteriales	f__Flavobacteriaceae	g__Capnocytophaga	s__Capnocytophaga_sp._oral_taxon_380	124	202	151	890	0	0	47	10	69	65	0	0	0	0	0	0	0	0	0	0
k__Bacteria	p__Bacteroidetes	c__Flavobacteriia	o__Flavobacteriales	f__Flavobacteriaceae	g__Capnocytophaga	s__Capnocytophaga_sp._oral_taxon_412	42	172	0	183	0	0	134	3	46	233	0	0	0	0	0	0	0	0	0	0
k__Bacteria	p__Bacteroidetes	c__Flavobacteriia	o__Flavobacteriales	f__Flavobacteriaceae	g__Capnocytophaga	s__Capnocytophaga_sp._oral_taxon_863	77	124	128	937	0	0	121	0	175	374	0	0	0	0	0	0	0	0	0	0
k__Bacteria	p__Bacteroidetes	c__Flavobacteriia	o__Flavobacteriales	f__Flavobacteriaceae	g__Capnocytophaga	s__Capnocytophaga_sp._oral_taxon_864	3	48	8	291	0	0	4	0	26	42	0	0	0	0	0	0	0	0	0	0
k__Bacteria	p__Bacteroidetes	c__Flavobacteriia	o__Flavobacteriales	f__Flavobacteriaceae	g__Capnocytophaga	s__Capnocytophaga_sp._oral_taxon_878	193	524	14	2319	0	0	426	0	206	216	0	0	0	0	0	0	0	0	0	0
k__Bacteria	p__Bacteroidetes	c__Flavobacteriia	o__Flavobacteriales	f__Flavobacteriaceae	g__Capnocytophaga	s__Capnocytophaga_sputigena	949	5716	204	9159	0	0	241	6	192	817	0	0	0	0	0	0	0	0	0	0
k__Bacteria	p__Bacteroidetes	c__Flavobacteriia	o__Flavobacteriales	f__Flavobacteriaceae	g__Capnocytophaga	s__Capnocytophaga_stomatis	0	0	11	56	0	0	0	0	50	5	0	0	0	0	0	0	0	0	0	0
k__Bacteria	p__Bacteroidetes	c__Flavobacteriia	o__Flavobacteriales	f__Flavobacteriaceae	g__Capnocytophaga	s__Unclassified	2135	6524	1495	20914	0	0	4377	31	3781	12579	0	0	0	0	0	0	0	0	0	0
k__Bacteria	p__Bacteroidetes	c__Flavobacteriia	o__Flavobacteriales	f__Flavobacteriaceae	g__Cellulophaga	s__Cellulophaga_algicola	0	0	0	4	0	0	0	0	0	0	0	0	0	0	0	0	0	0	0	0
k__Bacteria	p__Bacteroidetes	c__Flavobacteriia	o__Flavobacteriales	f__Flavobacteriaceae	g__Cellulophaga	s__Cellulophaga_geojensis	6	0	0	0	0	0	0	0	0	0	0	0	0	0	0	0	0	0	0	0
k__Bacteria	p__Bacteroidetes	c__Flavobacteriia	o__Flavobacteriales	f__Flavobacteriaceae	g__Cellulophaga	s__Cellulophaga_lytica	0	0	0	0	0	0	0	0	0	6	0	0	0	0	0	0	0	0	0	0
k__Bacteria	p__Bacteroidetes	c__Flavobacteriia	o__Flavobacteriales	f__Flavobacteriaceae	g__Cellulophaga	s__Cellulophaga_tyrosinoxydans	0	0	0	0	0	0	0	0	0	0	0	0	0	0	0	0	0	0	0	0
k__Bacteria	p__Bacteroidetes	c__Flavobacteriia	o__Flavobacteriales	f__Flavobacteriaceae	g__Confluentibacter	s__Confluentibacter_citreus	0	0	2	0	0	0	0	0	4	0	0	0	0	0	0	0	0	0	0	0
k__Bacteria	p__Bacteroidetes	c__Flavobacteriia	o__Flavobacteriales	f__Flavobacteriaceae	g__Dokdonia	s__uncultured_Dokdonia_sp.	0	0	0	5	0	0	0	0	0	0	0	0	0	0	0	0	0	0	0	0
k__Bacteria	p__Bacteroidetes	c__Flavobacteriia	o__Flavobacteriales	f__Flavobacteriaceae	g__Euzebyella	s__Euzebyella_marina	0	0	0	0	0	0	0	0	3	4	0	0	0	0	0	0	0	0	0	0
k__Bacteria	p__Bacteroidetes	c__Flavobacteriia	o__Flavobacteriales	f__Flavobacteriaceae	g__Flagellimonas	s__Flagellimonas_aquimarina	0	0	0	15	0	0	0	0	0	0	0	0	0	0	0	0	0	0	0	0
k__Bacteria	p__Bacteroidetes	c__Flavobacteriia	o__Flavobacteriales	f__Flavobacteriaceae	g__Flavimarina	s__Flavimarina_sp._Hel_I_48	0	0	0	0	0	0	0	0	5	0	0	0	0	0	0	0	0	0	0	0
k__Bacteria	p__Bacteroidetes	c__Flavobacteriia	o__Flavobacteriales	f__Flavobacteriaceae	g__Flavivirga	s__Flavivirga_eckloniae	0	0	0	12	0	0	9	0	0	0	0	0	0	0	0	0	0	0	0	0
k__Bacteria	p__Bacteroidetes	c__Flavobacteriia	o__Flavobacteriales	f__Flavobacteriaceae	g__Flavobacterium	s__Flavobacterium_akiainvivens	0	0	0	0	0	0	0	0	0	6	0	0	0	0	0	0	0	0	0	0
k__Bacteria	p__Bacteroidetes	c__Flavobacteriia	o__Flavobacteriales	f__Flavobacteriaceae	g__Flavobacterium	s__Flavobacterium_album	0	0	0	3	0	0	0	0	0	0	0	0	0	0	0	0	0	0	0	0
k__Bacteria	p__Bacteroidetes	c__Flavobacteriia	o__Flavobacteriales	f__Flavobacteriaceae	g__Flavobacterium	s__Flavobacterium_amnicola	0	0	0	0	0	0	0	0	0	0	0	0	0	0	0	0	3	0	0	0
k__Bacteria	p__Bacteroidetes	c__Flavobacteriia	o__Flavobacteriales	f__Flavobacteriaceae	g__Flavobacterium	s__Flavobacterium_aquaticum	0	0	7	0	0	0	0	0	0	0	0	0	0	0	0	0	0	0	0	0
k__Bacteria	p__Bacteroidetes	c__Flavobacteriia	o__Flavobacteriales	f__Flavobacteriaceae	g__Flavobacterium	s__Flavobacterium_araucananum	6	0	0	8	0	0	0	0	0	0	0	0	0	0	0	0	0	0	0	0
k__Bacteria	p__Bacteroidetes	c__Flavobacteriia	o__Flavobacteriales	f__Flavobacteriaceae	g__Flavobacterium	s__Flavobacterium_arcticum	0	0	0	35	0	0	0	0	0	0	0	0	0	0	0	0	0	0	0	0
k__Bacteria	p__Bacteroidetes	c__Flavobacteriia	o__Flavobacteriales	f__Flavobacteriaceae	g__Flavobacterium	s__Flavobacterium_aurantiibacter	8	33	0	0	0	0	0	0	0	0	0	0	0	0	0	0	0	0	0	0
k__Bacteria	p__Bacteroidetes	c__Flavobacteriia	o__Flavobacteriales	f__Flavobacteriaceae	g__Flavobacterium	s__Flavobacterium_beibuense	0	7	0	0	0	0	0	0	0	0	0	0	0	0	0	0	0	0	0	0
k__Bacteria	p__Bacteroidetes	c__Flavobacteriia	o__Flavobacteriales	f__Flavobacteriaceae	g__Flavobacterium	s__Flavobacterium_branchiophilum	0	0	0	11	0	0	0	0	6	0	0	0	0	0	0	0	0	0	0	0
k__Bacteria	p__Bacteroidetes	c__Flavobacteriia	o__Flavobacteriales	f__Flavobacteriaceae	g__Flavobacterium	s__Flavobacterium_caeni	7	0	0	17	0	2	0	8	9	0	0	0	0	0	0	8	5	0	0	0
k__Bacteria	p__Bacteroidetes	c__Flavobacteriia	o__Flavobacteriales	f__Flavobacteriaceae	g__Flavobacterium	s__Flavobacterium_chungangense	0	0	0	36	0	0	0	0	0	0	0	0	0	0	0	0	0	0	0	0
k__Bacteria	p__Bacteroidetes	c__Flavobacteriia	o__Flavobacteriales	f__Flavobacteriaceae	g__Flavobacterium	s__Flavobacterium_columnare	0	34	4	50	0	0	0	0	5	5	0	0	0	0	0	0	0	0	0	0
k__Bacteria	p__Bacteroidetes	c__Flavobacteriia	o__Flavobacteriales	f__Flavobacteriaceae	g__Flavobacterium	s__Flavobacterium_crassostreae	0	0	0	0	0	0	0	0	3	0	0	0	0	0	0	0	0	0	0	0
k__Bacteria	p__Bacteroidetes	c__Flavobacteriia	o__Flavobacteriales	f__Flavobacteriaceae	g__Flavobacterium	s__Flavobacterium_croceum	0	0	0	0	0	0	0	0	0	0	0	0	0	0	0	0	0	0	0	0
k__Bacteria	p__Bacteroidetes	c__Flavobacteriia	o__Flavobacteriales	f__Flavobacteriaceae	g__Flavobacterium	s__Flavobacterium_cupreum	0	0	3	0	0	0	0	0	0	0	0	0	0	0	0	0	0	0	0	0
k__Bacteria	p__Bacteroidetes	c__Flavobacteriia	o__Flavobacteriales	f__Flavobacteriaceae	g__Flavobacterium	s__Flavobacterium_daejeonense	8	0	0	0	0	0	0	0	13	0	0	0	0	0	0	0	0	0	0	0
k__Bacteria	p__Bacteroidetes	c__Flavobacteriia	o__Flavobacteriales	f__Flavobacteriaceae	g__Flavobacterium	s__Flavobacterium_faecale	0	0	0	3	0	0	0	0	0	0	0	0	0	0	0	0	0	0	0	0
k__Bacteria	p__Bacteroidetes	c__Flavobacteriia	o__Flavobacteriales	f__Flavobacteriaceae	g__Flavobacterium	s__Flavobacterium_fluvii	5	0	0	0	0	0	0	0	0	0	0	0	0	0	0	0	0	0	0	0
k__Bacteria	p__Bacteroidetes	c__Flavobacteriia	o__Flavobacteriales	f__Flavobacteriaceae	g__Flavobacterium	s__Flavobacterium_frigidarium	0	0	0	5	0	0	0	0	0	0	0	0	0	0	0	0	0	0	0	0
k__Bacteria	p__Bacteroidetes	c__Flavobacteriia	o__Flavobacteriales	f__Flavobacteriaceae	g__Flavobacterium	s__Flavobacterium_frigoris	0	0	0	0	0	0	0	0	0	4	0	0	0	0	0	0	0	0	0	0
k__Bacteria	p__Bacteroidetes	c__Flavobacteriia	o__Flavobacteriales	f__Flavobacteriaceae	g__Flavobacterium	s__Flavobacterium_gillisiae	5	0	0	0	0	0	0	0	0	0	0	0	0	0	0	0	0	0	0	0
k__Bacteria	p__Bacteroidetes	c__Flavobacteriia	o__Flavobacteriales	f__Flavobacteriaceae	g__Flavobacterium	s__Flavobacterium_hercynium	0	0	0	21	0	0	0	0	0	0	0	0	0	0	0	0	0	0	0	0
k__Bacteria	p__Bacteroidetes	c__Flavobacteriia	o__Flavobacteriales	f__Flavobacteriaceae	g__Flavobacterium	s__Flavobacterium_johnsoniae	0	0	0	12	0	0	0	0	0	3	0	0	0	0	0	0	0	0	3	0
k__Bacteria	p__Bacteroidetes	c__Flavobacteriia	o__Flavobacteriales	f__Flavobacteriaceae	g__Flavobacterium	s__Flavobacterium_kingsejongi	0	0	0	4	0	0	0	0	0	0	0	0	0	0	0	0	0	0	0	0
k__Bacteria	p__Bacteroidetes	c__Flavobacteriia	o__Flavobacteriales	f__Flavobacteriaceae	g__Flavobacterium	s__Flavobacterium_macacae	0	0	0	0	0	0	0	0	7	0	0	0	0	0	0	0	0	0	0	0
k__Bacteria	p__Bacteroidetes	c__Flavobacteriia	o__Flavobacteriales	f__Flavobacteriaceae	g__Flavobacterium	s__Flavobacterium_marinum	0	0	0	10	0	0	0	0	7	0	0	0	0	0	0	0	0	0	0	0
k__Bacteria	p__Bacteroidetes	c__Flavobacteriia	o__Flavobacteriales	f__Flavobacteriaceae	g__Flavobacterium	s__Flavobacterium_micromati	0	0	0	3	0	0	0	0	0	8	0	0	0	0	0	0	0	0	0	0
k__Bacteria	p__Bacteroidetes	c__Flavobacteriia	o__Flavobacteriales	f__Flavobacteriaceae	g__Flavobacterium	s__Flavobacterium_nitrogenifigens	0	0	0	0	0	0	0	0	0	5	0	0	0	0	0	0	0	0	0	0
k__Bacteria	p__Bacteroidetes	c__Flavobacteriia	o__Flavobacteriales	f__Flavobacteriaceae	g__Flavobacterium	s__Flavobacterium_piscinae	0	0	0	3	0	0	0	0	0	0	0	0	0	0	0	0	0	0	0	0
k__Bacteria	p__Bacteroidetes	c__Flavobacteriia	o__Flavobacteriales	f__Flavobacteriaceae	g__Flavobacterium	s__Flavobacterium_psychrophilum	6	26	0	100	0	0	0	0	0	0	0	0	0	0	0	0	0	0	0	0
k__Bacteria	p__Bacteroidetes	c__Flavobacteriia	o__Flavobacteriales	f__Flavobacteriaceae	g__Flavobacterium	s__Flavobacterium_sediminis	0	0	0	0	0	0	0	0	17	0	0	0	0	0	0	0	0	0	0	0
k__Bacteria	p__Bacteroidetes	c__Flavobacteriia	o__Flavobacteriales	f__Flavobacteriaceae	g__Flavobacterium	s__Flavobacterium_segetis	0	0	0	0	0	0	0	0	3	0	0	0	0	0	0	0	0	0	0	0
k__Bacteria	p__Bacteroidetes	c__Flavobacteriia	o__Flavobacteriales	f__Flavobacteriaceae	g__Flavobacterium	s__Flavobacterium_soli	0	0	0	5	0	0	0	0	0	0	0	0	0	0	0	0	0	0	0	0
k__Bacteria	p__Bacteroidetes	c__Flavobacteriia	o__Flavobacteriales	f__Flavobacteriaceae	g__Flavobacterium	s__Flavobacterium_sp.	0	10	0	72	0	0	0	0	0	0	0	0	0	0	3	0	0	0	0	0
k__Bacteria	p__Bacteroidetes	c__Flavobacteriia	o__Flavobacteriales	f__Flavobacteriaceae	g__Flavobacterium	s__Flavobacterium_sp._1	0	0	3	0	0	0	0	0	0	0	0	0	0	0	0	0	0	0	0	0
k__Bacteria	p__Bacteroidetes	c__Flavobacteriia	o__Flavobacteriales	f__Flavobacteriaceae	g__Flavobacterium	s__Flavobacterium_sp._102	0	0	0	6	0	0	0	0	0	0	0	0	0	0	0	0	0	0	0	0
k__Bacteria	p__Bacteroidetes	c__Flavobacteriia	o__Flavobacteriales	f__Flavobacteriaceae	g__Flavobacterium	s__Flavobacterium_sp._103	0	0	0	5	0	0	0	0	4	0	0	0	0	0	0	0	0	0	0	0
k__Bacteria	p__Bacteroidetes	c__Flavobacteriia	o__Flavobacteriales	f__Flavobacteriaceae	g__Flavobacterium	s__Flavobacterium_sp._140616W15	0	41	22	0	0	0	0	0	0	0	0	0	0	0	0	0	0	0	0	0
k__Bacteria	p__Bacteroidetes	c__Flavobacteriia	o__Flavobacteriales	f__Flavobacteriaceae	g__Flavobacterium	s__Flavobacterium_sp._5	0	0	0	0	0	0	4	0	0	0	0	0	0	0	0	0	0	0	0	0
k__Bacteria	p__Bacteroidetes	c__Flavobacteriia	o__Flavobacteriales	f__Flavobacteriaceae	g__Flavobacterium	s__Flavobacterium_sp._ACN6	0	0	0	0	0	0	0	8	0	0	0	0	0	0	0	0	0	0	0	0
k__Bacteria	p__Bacteroidetes	c__Flavobacteriia	o__Flavobacteriales	f__Flavobacteriaceae	g__Flavobacterium	s__Flavobacterium_sp._ASV13	0	0	0	0	0	0	0	0	3	0	0	0	0	0	0	0	0	0	0	0
k__Bacteria	p__Bacteroidetes	c__Flavobacteriia	o__Flavobacteriales	f__Flavobacteriaceae	g__Flavobacterium	s__Flavobacterium_sp._BFFFF2	3	0	0	39	0	0	0	0	0	0	0	0	0	0	0	0	0	0	0	0
k__Bacteria	p__Bacteroidetes	c__Flavobacteriia	o__Flavobacteriales	f__Flavobacteriaceae	g__Flavobacterium	s__Flavobacterium_sp._CF136	0	0	0	0	0	0	0	0	0	0	0	0	0	0	0	0	0	0	0	0
k__Bacteria	p__Bacteroidetes	c__Flavobacteriia	o__Flavobacteriales	f__Flavobacteriaceae	g__Flavobacterium	s__Flavobacterium_sp._J27	0	0	0	0	0	0	0	0	0	4	0	0	0	0	0	0	0	0	0	0
k__Bacteria	p__Bacteroidetes	c__Flavobacteriia	o__Flavobacteriales	f__Flavobacteriaceae	g__Flavobacterium	s__Flavobacterium_sp._MedPE_SWcel	0	0	0	89	0	0	0	0	0	0	0	0	0	0	0	0	0	0	0	0
k__Bacteria	p__Bacteroidetes	c__Flavobacteriia	o__Flavobacteriales	f__Flavobacteriaceae	g__Flavobacterium	s__Flavobacterium_sp._Root420	4	6	0	0	0	0	0	0	0	9	0	0	0	0	0	0	0	0	0	0
k__Bacteria	p__Bacteroidetes	c__Flavobacteriia	o__Flavobacteriales	f__Flavobacteriaceae	g__Flavobacterium	s__Flavobacterium_sp._Root935	0	0	0	8	0	0	0	0	0	0	0	0	0	0	0	0	0	0	0	0
k__Bacteria	p__Bacteroidetes	c__Flavobacteriia	o__Flavobacteriales	f__Flavobacteriaceae	g__Flavobacterium	s__Flavobacterium_sp._URHB0058	0	0	0	0	0	0	0	0	0	4	0	0	0	0	0	0	0	0	0	0
k__Bacteria	p__Bacteroidetes	c__Flavobacteriia	o__Flavobacteriales	f__Flavobacteriaceae	g__Flavobacterium	s__Flavobacterium_stagni	0	0	0	4	0	0	0	0	0	0	0	0	0	0	0	0	0	0	0	0
k__Bacteria	p__Bacteroidetes	c__Flavobacteriia	o__Flavobacteriales	f__Flavobacteriaceae	g__Flavobacterium	s__Flavobacterium_subsaxonicum	0	0	0	0	0	0	0	0	7	21	0	0	0	0	0	0	0	0	6	0
k__Bacteria	p__Bacteroidetes	c__Flavobacteriia	o__Flavobacteriales	f__Flavobacteriaceae	g__Flavobacterium	s__Flavobacterium_succinicans	0	0	0	0	0	0	0	0	0	33	0	0	0	0	0	0	0	0	0	0
k__Bacteria	p__Bacteroidetes	c__Flavobacteriia	o__Flavobacteriales	f__Flavobacteriaceae	g__Flavobacterium	s__Flavobacterium_sufflavum	0	0	0	7	0	0	0	0	4	77	0	0	0	0	0	0	0	0	0	0
k__Bacteria	p__Bacteroidetes	c__Flavobacteriia	o__Flavobacteriales	f__Flavobacteriaceae	g__Flavobacterium	s__Flavobacterium_suncheonense	0	0	0	5	0	0	0	0	0	0	0	0	0	0	0	0	0	0	0	0
k__Bacteria	p__Bacteroidetes	c__Flavobacteriia	o__Flavobacteriales	f__Flavobacteriaceae	g__Flavobacterium	s__Flavobacterium_tangerinum	0	0	0	15	0	0	0	0	0	0	0	0	0	0	0	0	0	0	0	0
k__Bacteria	p__Bacteroidetes	c__Flavobacteriia	o__Flavobacteriales	f__Flavobacteriaceae	g__Flavobacterium	s__Flavobacterium_tibetense	0	0	0	0	0	0	0	0	0	0	0	0	0	0	0	0	0	0	0	0
k__Bacteria	p__Bacteroidetes	c__Flavobacteriia	o__Flavobacteriales	f__Flavobacteriaceae	g__Flavobacterium	s__Flavobacterium_urocaniciphilum	0	0	0	3	0	0	9	0	0	0	0	0	0	0	0	0	0	0	0	0
k__Bacteria	p__Bacteroidetes	c__Flavobacteriia	o__Flavobacteriales	f__Flavobacteriaceae	g__Flavobacterium	s__Flavobacterium_xueshanense	0	0	0	26	0	0	0	0	0	0	0	0	0	0	0	0	0	0	0	0
k__Bacteria	p__Bacteroidetes	c__Flavobacteriia	o__Flavobacteriales	f__Flavobacteriaceae	g__Flavobacterium	s__Unclassified	5	0	0	38	0	0	0	47	6	0	0	0	0	0	0	0	0	0	0	0
k__Bacteria	p__Bacteroidetes	c__Flavobacteriia	o__Flavobacteriales	f__Flavobacteriaceae	g__Flavobacterium	s__[Flexibacter]_sp._ATCC_35103	0	0	0	0	0	0	0	0	0	10	0	0	0	0	0	0	0	0	0	0
k__Bacteria	p__Bacteroidetes	c__Flavobacteriia	o__Flavobacteriales	f__Flavobacteriaceae	g__Formosa	s__Formosa_sp._Hel1_33_131	0	0	0	0	0	7	0	0	0	0	0	0	0	0	0	0	0	0	0	0
k__Bacteria	p__Bacteroidetes	c__Flavobacteriia	o__Flavobacteriales	f__Flavobacteriaceae	g__Gelidibacter	s__Gelidibacter_algens	0	0	0	0	0	0	0	0	0	5	0	0	0	0	0	0	0	0	0	0
k__Bacteria	p__Bacteroidetes	c__Flavobacteriia	o__Flavobacteriales	f__Flavobacteriaceae	g__Gelidibacter	s__Gelidibacter_mesophilus	0	5	0	0	0	0	0	0	0	0	0	0	0	0	0	0	0	0	0	0
k__Bacteria	p__Bacteroidetes	c__Flavobacteriia	o__Flavobacteriales	f__Flavobacteriaceae	g__Gillisia	s__Gillisia_sp._CAL575	0	0	0	0	0	0	0	0	0	0	0	0	0	0	0	0	0	0	0	0
k__Bacteria	p__Bacteroidetes	c__Flavobacteriia	o__Flavobacteriales	f__Flavobacteriaceae	g__Gramella	s__Gramella_flava	0	0	8	0	0	0	0	0	0	0	0	0	0	0	0	0	0	0	0	0
k__Bacteria	p__Bacteroidetes	c__Flavobacteriia	o__Flavobacteriales	f__Flavobacteriaceae	g__Jejuia	s__Jejuia_pallidilutea	6	0	0	0	0	0	0	0	0	0	0	0	0	0	0	0	0	0	0	0
k__Bacteria	p__Bacteroidetes	c__Flavobacteriia	o__Flavobacteriales	f__Flavobacteriaceae	g__Joostella	s__Joostella_marina	0	0	0	0	0	0	0	0	3	0	0	0	0	0	0	0	0	0	0	0
k__Bacteria	p__Bacteroidetes	c__Flavobacteriia	o__Flavobacteriales	f__Flavobacteriaceae	g__Kordia	s__Kordia_zhangzhouensis	0	0	0	17	0	0	0	0	5	0	0	0	0	0	0	0	0	0	0	0
k__Bacteria	p__Bacteroidetes	c__Flavobacteriia	o__Flavobacteriales	f__Flavobacteriaceae	g__Lacinutrix	s__Lacinutrix_venerupis	0	0	0	0	0	0	0	0	5	0	0	0	0	0	0	0	0	0	0	0
k__Bacteria	p__Bacteroidetes	c__Flavobacteriia	o__Flavobacteriales	f__Flavobacteriaceae	g__Leeuwenhoekiella	s__Leeuwenhoekiella_marinoflava	0	0	0	15	0	0	0	0	0	0	0	0	0	0	0	0	0	0	0	0
k__Bacteria	p__Bacteroidetes	c__Flavobacteriia	o__Flavobacteriales	f__Flavobacteriaceae	g__Lutibacter	s__Lutibacter_agarilyticus	0	0	0	9	0	0	5	0	0	0	0	0	0	0	0	0	0	0	0	0
k__Bacteria	p__Bacteroidetes	c__Flavobacteriia	o__Flavobacteriales	f__Flavobacteriaceae	g__Lutibacter	s__Lutibacter_maritimus	0	0	0	0	0	0	0	0	4	0	0	0	0	0	0	0	0	0	0	0
k__Bacteria	p__Bacteroidetes	c__Flavobacteriia	o__Flavobacteriales	f__Flavobacteriaceae	g__Lutibacter	s__Lutibacter_oricola	0	0	0	14	0	0	0	0	0	0	0	0	0	0	0	0	0	0	0	0
k__Bacteria	p__Bacteroidetes	c__Flavobacteriia	o__Flavobacteriales	f__Flavobacteriaceae	g__Lutibacter	s__Lutibacter_profundi	0	0	0	13	0	0	0	0	0	0	0	0	0	0	0	0	0	0	0	0
k__Bacteria	p__Bacteroidetes	c__Flavobacteriia	o__Flavobacteriales	f__Flavobacteriaceae	g__Lutibacter	s__Lutibacter_sp.	0	0	0	57	0	0	0	0	0	0	0	0	0	0	0	0	0	0	0	0
k__Bacteria	p__Bacteroidetes	c__Flavobacteriia	o__Flavobacteriales	f__Flavobacteriaceae	g__Lutibacter	s__Lutibacter_sp._HS1_25	0	0	0	0	0	0	0	0	0	0	0	0	0	0	0	0	0	0	0	0
k__Bacteria	p__Bacteroidetes	c__Flavobacteriia	o__Flavobacteriales	f__Flavobacteriaceae	g__Mangrovimonas	s__Mangrovimonas_sp._ST2L15	0	3	0	0	0	0	0	0	0	0	0	0	0	0	0	0	0	0	0	0
k__Bacteria	p__Bacteroidetes	c__Flavobacteriia	o__Flavobacteriales	f__Flavobacteriaceae	g__Maribacter	s__Maribacter_vaceletii	0	0	0	0	0	0	0	0	3	0	0	0	0	0	0	0	0	0	0	0
k__Bacteria	p__Bacteroidetes	c__Flavobacteriia	o__Flavobacteriales	f__Flavobacteriaceae	g__Mesonia	s__Mesonia_algae	0	0	0	25	0	0	0	0	0	0	0	0	0	0	0	0	0	0	0	0
k__Bacteria	p__Bacteroidetes	c__Flavobacteriia	o__Flavobacteriales	f__Flavobacteriaceae	g__Mesonia	s__Mesonia_aquimarina	0	8	0	19	0	0	0	0	0	0	0	0	0	0	0	0	0	0	0	0
k__Bacteria	p__Bacteroidetes	c__Flavobacteriia	o__Flavobacteriales	f__Flavobacteriaceae	g__Mesonia	s__Mesonia_phycicola	0	0	0	26	0	0	0	0	3	0	0	0	0	0	0	0	0	0	0	0
k__Bacteria	p__Bacteroidetes	c__Flavobacteriia	o__Flavobacteriales	f__Flavobacteriaceae	g__Mesonia	s__Mesonia_sp._K7	0	0	0	15	0	0	0	0	0	0	0	0	0	0	0	0	0	0	0	0
k__Bacteria	p__Bacteroidetes	c__Flavobacteriia	o__Flavobacteriales	f__Flavobacteriaceae	g__Muricauda	s__Muricauda_antarctica	0	0	0	9	0	0	0	0	0	5	0	0	0	0	0	0	0	0	0	0
k__Bacteria	p__Bacteroidetes	c__Flavobacteriia	o__Flavobacteriales	f__Flavobacteriaceae	g__Muricauda	s__Muricauda_lutaonensis	0	0	0	0	0	0	0	0	48	0	0	0	0	0	0	0	0	0	0	0
k__Bacteria	p__Bacteroidetes	c__Flavobacteriia	o__Flavobacteriales	f__Flavobacteriaceae	g__Muricauda	s__Muricauda_nanhaiensis	0	0	0	12	0	0	0	0	0	0	0	0	0	0	0	0	0	0	0	0
k__Bacteria	p__Bacteroidetes	c__Flavobacteriia	o__Flavobacteriales	f__Flavobacteriaceae	g__Muricauda	s__Muricauda_olearia	0	24	0	0	0	0	0	0	0	0	0	0	0	0	0	0	0	0	0	0
k__Bacteria	p__Bacteroidetes	c__Flavobacteriia	o__Flavobacteriales	f__Flavobacteriaceae	g__Muricauda	s__Muricauda_pacifica	0	0	0	15	0	0	0	0	0	0	0	0	0	0	0	0	0	0	0	0
k__Bacteria	p__Bacteroidetes	c__Flavobacteriia	o__Flavobacteriales	f__Flavobacteriaceae	g__Muricauda	s__Muricauda_sp._ARW7G5W	0	0	0	14	0	0	0	0	0	0	0	0	0	0	0	0	0	0	0	0
k__Bacteria	p__Bacteroidetes	c__Flavobacteriia	o__Flavobacteriales	f__Flavobacteriaceae	g__Muricauda	s__Muricauda_sp._TMED12	0	0	0	0	0	0	0	0	0	0	0	0	0	0	0	0	0	0	0	0
k__Bacteria	p__Bacteroidetes	c__Flavobacteriia	o__Flavobacteriales	f__Flavobacteriaceae	g__Myroides	s__Myroides_odoratimimus	53	4	0	0	0	0	0	0	0	0	0	0	0	0	0	0	0	0	0	0
k__Bacteria	p__Bacteroidetes	c__Flavobacteriia	o__Flavobacteriales	f__Flavobacteriaceae	g__Myroides	s__Myroides_odoratus	0	0	0	13	0	0	0	0	0	0	0	0	0	0	0	0	0	0	0	0
k__Bacteria	p__Bacteroidetes	c__Flavobacteriia	o__Flavobacteriales	f__Flavobacteriaceae	g__Myroides	s__Myroides_profundi	0	0	0	6	0	0	0	0	0	0	0	0	0	0	0	0	0	0	0	0
k__Bacteria	p__Bacteroidetes	c__Flavobacteriia	o__Flavobacteriales	f__Flavobacteriaceae	g__Myroides	s__Unclassified	0	0	0	0	0	0	0	0	3	0	0	0	0	0	0	0	0	0	0	0
k__Bacteria	p__Bacteroidetes	c__Flavobacteriia	o__Flavobacteriales	f__Flavobacteriaceae	g__Nonlabens	s__Nonlabens_tegetincola	0	0	0	25	0	0	0	0	0	0	0	0	0	0	0	0	0	0	0	0
k__Bacteria	p__Bacteroidetes	c__Flavobacteriia	o__Flavobacteriales	f__Flavobacteriaceae	g__Nonlabens	s__Nonlabens_xylanidelens	0	0	0	14	0	0	0	0	0	0	0	0	0	0	0	0	0	0	0	0
k__Bacteria	p__Bacteroidetes	c__Flavobacteriia	o__Flavobacteriales	f__Flavobacteriaceae	g__Polaribacter	s__Polaribacter_haliotis	0	0	0	0	0	0	0	0	4	0	0	0	0	0	0	0	0	0	0	0
k__Bacteria	p__Bacteroidetes	c__Flavobacteriia	o__Flavobacteriales	f__Flavobacteriaceae	g__Polaribacter	s__Polaribacter_porphyrae	0	0	0	15	0	0	0	0	0	0	0	0	0	0	0	0	0	0	0	0
k__Bacteria	p__Bacteroidetes	c__Flavobacteriia	o__Flavobacteriales	f__Flavobacteriaceae	g__Polaribacter	s__Polaribacter_reichenbachii	0	0	0	0	0	0	0	0	0	0	0	0	0	0	0	0	0	4	0	0
k__Bacteria	p__Bacteroidetes	c__Flavobacteriia	o__Flavobacteriales	f__Flavobacteriaceae	g__Polaribacter	s__Polaribacter_sp._Hel1_33_49	0	0	0	0	0	0	0	0	0	18	0	0	0	0	0	0	0	0	0	0
k__Bacteria	p__Bacteroidetes	c__Flavobacteriia	o__Flavobacteriales	f__Flavobacteriaceae	g__Polaribacter	s__Polaribacter_sp._Hel_I_88	0	0	0	0	0	0	0	0	0	0	0	0	0	0	0	0	0	0	0	0
k__Bacteria	p__Bacteroidetes	c__Flavobacteriia	o__Flavobacteriales	f__Flavobacteriaceae	g__Polaribacter	s__Polaribacter_sp._KT25b	0	0	0	16	0	0	0	0	0	0	0	0	0	0	0	0	0	0	0	0
k__Bacteria	p__Bacteroidetes	c__Flavobacteriia	o__Flavobacteriales	f__Flavobacteriaceae	g__Polaribacter	s__Polaribacter_sp._SA4_10	0	6	0	0	0	0	0	0	0	0	0	0	0	0	0	0	0	0	0	0
k__Bacteria	p__Bacteroidetes	c__Flavobacteriia	o__Flavobacteriales	f__Flavobacteriaceae	g__Pseudobizionia	s__Pseudobizionia_ponticola	0	0	0	0	0	0	20	28	0	53	0	5	4	0	27	0	14	0	5	65
k__Bacteria	p__Bacteroidetes	c__Flavobacteriia	o__Flavobacteriales	f__Flavobacteriaceae	g__Psychroflexus	s__Psychroflexus_aestuariivivens	0	0	4	172	0	0	0	0	0	0	0	0	0	0	0	0	0	0	0	0
k__Bacteria	p__Bacteroidetes	c__Flavobacteriia	o__Flavobacteriales	f__Flavobacteriaceae	g__Psychroflexus	s__Unclassified	0	0	0	6	0	0	0	0	0	0	0	0	0	0	0	0	0	0	0	0
k__Bacteria	p__Bacteroidetes	c__Flavobacteriia	o__Flavobacteriales	f__Flavobacteriaceae	g__Psychroserpens	s__Psychroserpens_mesophilus	0	0	0	0	0	0	0	0	0	0	0	0	0	0	0	0	0	0	0	0
k__Bacteria	p__Bacteroidetes	c__Flavobacteriia	o__Flavobacteriales	f__Flavobacteriaceae	g__Pustulibacterium	s__Pustulibacterium_marinum	0	0	0	0	0	0	0	0	7	0	0	0	0	0	0	0	0	0	0	0
k__Bacteria	p__Bacteroidetes	c__Flavobacteriia	o__Flavobacteriales	f__Flavobacteriaceae	g__Robiginitalea	s__Robiginitalea_sediminis	0	0	0	13	0	0	0	0	0	0	0	0	0	0	0	0	0	0	0	0
k__Bacteria	p__Bacteroidetes	c__Flavobacteriia	o__Flavobacteriales	f__Flavobacteriaceae	g__Salegentibacter	s__Salegentibacter_flavus	0	0	0	63	0	0	0	0	0	0	0	0	0	0	0	0	0	0	0	0
k__Bacteria	p__Bacteroidetes	c__Flavobacteriia	o__Flavobacteriales	f__Flavobacteriaceae	g__Salegentibacter	s__Salegentibacter_holothuriorum	0	0	0	0	0	0	0	0	0	3	0	0	0	0	0	0	0	0	0	0
k__Bacteria	p__Bacteroidetes	c__Flavobacteriia	o__Flavobacteriales	f__Flavobacteriaceae	g__Salinimicrobium	s__Salinimicrobium_terrae	0	48	0	8	0	0	0	0	0	0	0	0	0	0	0	0	0	0	0	0
k__Bacteria	p__Bacteroidetes	c__Flavobacteriia	o__Flavobacteriales	f__Flavobacteriaceae	g__Sediminibacter	s__Sediminibacter_sp._Hel_I_10	0	0	0	3	0	0	0	0	4	0	0	0	0	0	0	0	0	0	0	0
k__Bacteria	p__Bacteroidetes	c__Flavobacteriia	o__Flavobacteriales	f__Flavobacteriaceae	g__Sediminicola	s__Sediminicola_luteus	0	0	0	15	0	0	0	0	0	0	0	0	0	0	0	0	0	0	0	0
k__Bacteria	p__Bacteroidetes	c__Flavobacteriia	o__Flavobacteriales	f__Flavobacteriaceae	g__Seonamhaeicola	s__Seonamhaeicola_aphaedonensis	0	0	9	0	0	0	0	0	0	0	0	0	0	0	0	0	0	0	0	0
k__Bacteria	p__Bacteroidetes	c__Flavobacteriia	o__Flavobacteriales	f__Flavobacteriaceae	g__Sinomicrobium	s__Sinomicrobium_oceani	5	0	0	0	0	0	0	0	0	0	0	0	0	0	0	0	0	0	0	0
k__Bacteria	p__Bacteroidetes	c__Flavobacteriia	o__Flavobacteriales	f__Flavobacteriaceae	g__Sinomicrobium	s__Sinomicrobium_pectinilyticum	0	0	4	0	0	0	0	0	0	10	0	0	0	0	0	0	0	0	0	0
k__Bacteria	p__Bacteroidetes	c__Flavobacteriia	o__Flavobacteriales	f__Flavobacteriaceae	g__Tamlana	s__Tamlana_sp._s12	0	0	0	0	0	0	0	0	0	0	0	0	0	0	0	5	3	0	0	0
k__Bacteria	p__Bacteroidetes	c__Flavobacteriia	o__Flavobacteriales	f__Flavobacteriaceae	g__Tenacibaculum	s__Tenacibaculum_agarivorans	0	0	0	19	0	0	0	0	0	0	0	0	0	0	0	0	0	0	0	0
k__Bacteria	p__Bacteroidetes	c__Flavobacteriia	o__Flavobacteriales	f__Flavobacteriaceae	g__Tenacibaculum	s__Tenacibaculum_finnmarkense	3	0	0	0	0	0	0	0	0	0	0	0	0	0	0	0	0	0	0	0
k__Bacteria	p__Bacteroidetes	c__Flavobacteriia	o__Flavobacteriales	f__Flavobacteriaceae	g__Tenacibaculum	s__Tenacibaculum_gallaicum	0	0	0	15	0	0	0	0	0	0	0	0	0	0	0	0	0	0	0	0
k__Bacteria	p__Bacteroidetes	c__Flavobacteriia	o__Flavobacteriales	f__Flavobacteriaceae	g__Tenacibaculum	s__Tenacibaculum_maritimum	0	0	0	27	0	0	3	0	0	51	0	0	0	0	0	0	0	0	0	0
k__Bacteria	p__Bacteroidetes	c__Flavobacteriia	o__Flavobacteriales	f__Flavobacteriaceae	g__Tenacibaculum	s__Tenacibaculum_mesophilum	10	0	0	0	0	0	0	0	0	6	0	0	0	0	0	0	0	0	0	0
k__Bacteria	p__Bacteroidetes	c__Flavobacteriia	o__Flavobacteriales	f__Flavobacteriaceae	g__Tenacibaculum	s__Tenacibaculum_ovolyticum	0	0	0	8	0	0	0	0	0	0	0	0	0	0	0	0	0	0	0	0
k__Bacteria	p__Bacteroidetes	c__Flavobacteriia	o__Flavobacteriales	f__Flavobacteriaceae	g__Tenacibaculum	s__Tenacibaculum_sp._SG_28	0	0	0	0	0	0	0	0	6	0	0	0	0	0	0	0	0	0	0	0
k__Bacteria	p__Bacteroidetes	c__Flavobacteriia	o__Flavobacteriales	f__Flavobacteriaceae	g__Tenacibaculum	s__Tenacibaculum_sp._SZ_18	6	0	0	7	0	0	0	0	3	0	0	0	0	0	0	0	0	0	0	0
k__Bacteria	p__Bacteroidetes	c__Flavobacteriia	o__Flavobacteriales	f__Flavobacteriaceae	g__Tenacibaculum	s__Tenacibaculum_todarodis	0	0	0	0	0	0	0	0	0	0	0	0	0	0	0	0	0	0	0	0
k__Bacteria	p__Bacteroidetes	c__Flavobacteriia	o__Flavobacteriales	f__Flavobacteriaceae	g__Ulvibacterium	s__Ulvibacterium_marinum	0	0	0	16	0	0	0	0	0	10	0	0	0	0	0	0	0	0	0	0
k__Bacteria	p__Bacteroidetes	c__Flavobacteriia	o__Flavobacteriales	f__Flavobacteriaceae	g__Unclassified	s__Flavobacteriaceae_bacterium	0	0	0	0	0	0	0	0	3	0	0	0	0	0	0	0	0	0	0	0
k__Bacteria	p__Bacteroidetes	c__Flavobacteriia	o__Flavobacteriales	f__Flavobacteriaceae	g__Unclassified	s__Flavobacteriaceae_bacterium_144Ye	0	0	0	43	0	0	0	0	0	0	0	0	0	0	0	0	0	0	0	0
k__Bacteria	p__Bacteroidetes	c__Flavobacteriia	o__Flavobacteriales	f__Flavobacteriaceae	g__Unclassified	s__Flavobacteriaceae_bacterium_3519_10	0	0	0	0	0	0	0	0	0	5	0	0	0	0	0	0	0	0	0	0
k__Bacteria	p__Bacteroidetes	c__Flavobacteriia	o__Flavobacteriales	f__Flavobacteriaceae	g__Unclassified	s__Flavobacteriaceae_bacterium_A100	0	0	0	11	0	0	0	0	0	0	0	0	0	0	0	0	0	0	0	0
k__Bacteria	p__Bacteroidetes	c__Flavobacteriia	o__Flavobacteriales	f__Flavobacteriaceae	g__Unclassified	s__Flavobacteriaceae_bacterium_CG02_land_8_20_14_3_00_34_13	0	9	0	0	0	0	3	0	0	0	0	0	0	0	0	0	0	0	0	0
k__Bacteria	p__Bacteroidetes	c__Flavobacteriia	o__Flavobacteriales	f__Flavobacteriaceae	g__Unclassified	s__Flavobacteriaceae_bacterium_CG18_big_fil_WC_8_21_14_2_50_34_36	0	0	0	8	0	0	0	0	0	0	0	0	0	0	0	0	0	0	0	0
k__Bacteria	p__Bacteroidetes	c__Flavobacteriia	o__Flavobacteriales	f__Flavobacteriaceae	g__Unclassified	s__Flavobacteriaceae_bacterium_CRH	0	0	0	12	0	0	0	0	0	0	0	0	0	0	0	0	0	0	0	0
k__Bacteria	p__Bacteroidetes	c__Flavobacteriia	o__Flavobacteriales	f__Flavobacteriaceae	g__Unclassified	s__Flavobacteriaceae_bacterium_YIM_102668	0	0	0	0	0	0	0	0	0	3	0	0	0	0	0	0	0	0	0	0
k__Bacteria	p__Bacteroidetes	c__Flavobacteriia	o__Flavobacteriales	f__Flavobacteriaceae	g__Unclassified	s__Flavobacteriaceae_bacterium__ex_Bugula_neritina_AB1_	0	0	0	7	0	0	0	0	0	8	0	0	0	0	0	0	0	0	0	0
k__Bacteria	p__Bacteroidetes	c__Flavobacteriia	o__Flavobacteriales	f__Flavobacteriaceae	g__Unclassified	s__Unclassified	11	43	6	266	0	0	0	0	30	133	0	4	0	0	0	0	0	0	0	0
k__Bacteria	p__Bacteroidetes	c__Flavobacteriia	o__Flavobacteriales	f__Flavobacteriaceae	g__Urechidicola	s__Urechidicola_croceus	0	0	0	0	0	0	0	0	3	0	0	0	0	0	0	0	0	0	0	0
k__Bacteria	p__Bacteroidetes	c__Flavobacteriia	o__Flavobacteriales	f__Flavobacteriaceae	g__Vaginella	s__Vaginella_massiliensis	0	0	0	0	0	0	80	0	0	0	0	0	0	0	0	0	0	0	0	0
k__Bacteria	p__Bacteroidetes	c__Flavobacteriia	o__Flavobacteriales	f__Flavobacteriaceae	g__Wenyingzhuangia	s__Wenyingzhuangia_fucanilytica	0	0	0	0	0	0	0	0	0	0	0	0	0	0	3	0	0	0	0	0
k__Bacteria	p__Bacteroidetes	c__Flavobacteriia	o__Flavobacteriales	f__Flavobacteriaceae	g__Zhouia	s__Zhouia_amylolytica	5	0	0	0	0	0	0	0	4	0	0	0	0	0	0	0	0	0	0	0
k__Bacteria	p__Bacteroidetes	c__Flavobacteriia	o__Flavobacteriales	f__Flavobacteriaceae	g__Zobellia	s__Zobellia_sp._OII3	0	0	0	0	0	0	0	0	0	49	0	0	0	0	0	0	0	0	0	0
k__Bacteria	p__Bacteroidetes	c__Flavobacteriia	o__Flavobacteriales	f__Flavobacteriaceae	g__Zobellia	s__Zobellia_uliginosa	8	0	0	0	0	0	0	25	0	0	0	0	0	0	0	0	0	0	0	0
k__Bacteria	p__Bacteroidetes	c__Flavobacteriia	o__Flavobacteriales	f__Flavobacteriaceae	g__Zunongwangia	s__Zunongwangia_atlantica	0	0	0	0	0	0	0	0	3	0	0	0	0	0	0	0	0	0	0	0
k__Bacteria	p__Bacteroidetes	c__Flavobacteriia	o__Flavobacteriales	f__Schleiferiaceae	g__Schleiferia	s__Schleiferia_thermophila	0	0	0	19	0	0	0	0	0	0	0	0	0	0	0	0	0	0	0	0
k__Bacteria	p__Bacteroidetes	c__Flavobacteriia	o__Flavobacteriales	f__Unclassified	g__Unclassified	s__Flavobacteriales_bacterium	0	0	3	39	0	0	0	0	0	34	0	0	0	0	0	0	0	0	6	0
k__Bacteria	p__Bacteroidetes	c__Flavobacteriia	o__Flavobacteriales	f__Unclassified	g__Unclassified	s__Flavobacteriales_bacterium_ALC_1	0	0	0	19	0	0	0	0	0	0	0	0	0	0	0	0	0	0	0	0
k__Bacteria	p__Bacteroidetes	c__Flavobacteriia	o__Flavobacteriales	f__Unclassified	g__Unclassified	s__Flavobacteriales_bacterium_BRH_c54	0	0	0	3	0	0	0	0	0	0	0	0	0	0	0	0	0	0	0	0
k__Bacteria	p__Bacteroidetes	c__Flavobacteriia	o__Flavobacteriales	f__Unclassified	g__Unclassified	s__Flavobacteriales_bacterium_CG_4_10_14_0_2_um_filter_32_8	0	0	0	6	0	0	0	0	0	0	0	0	0	0	0	0	0	0	0	0
k__Bacteria	p__Bacteroidetes	c__Flavobacteriia	o__Flavobacteriales	f__Unclassified	g__Unclassified	s__Flavobacteriales_bacterium_TMED113	0	0	0	0	0	0	0	0	3	0	0	0	0	0	0	0	0	0	0	0
k__Bacteria	p__Bacteroidetes	c__Flavobacteriia	o__Flavobacteriales	f__Unclassified	g__Unclassified	s__Flavobacteriales_bacterium_TMED84	0	0	0	3	0	0	0	0	0	0	0	0	0	0	0	0	0	0	0	0
k__Bacteria	p__Bacteroidetes	c__Flavobacteriia	o__Flavobacteriales	f__Unclassified	g__Unclassified	s__Unclassified	69	5	19	51	0	0	4	0	13	53	0	0	0	0	0	0	0	0	0	0
k__Bacteria	p__Bacteroidetes	c__Flavobacteriia	o__Flavobacteriales	f__Weeksellaceae	g__Algoriella	s__Algoriella_xinjiangensis	0	0	0	0	0	0	0	0	0	0	0	0	0	0	0	0	0	0	0	0
k__Bacteria	p__Bacteroidetes	c__Flavobacteriia	o__Flavobacteriales	f__Weeksellaceae	g__Apibacter	s__Apibacter_adventoris	0	0	0	22	0	0	3	0	0	0	0	0	0	0	0	0	0	0	0	0
k__Bacteria	p__Bacteroidetes	c__Flavobacteriia	o__Flavobacteriales	f__Weeksellaceae	g__Apibacter	s__Apibacter_mensalis	0	0	0	7	0	0	0	0	0	0	0	0	0	0	0	0	0	0	0	0
k__Bacteria	p__Bacteroidetes	c__Flavobacteriia	o__Flavobacteriales	f__Weeksellaceae	g__Apibacter	s__Apibacter_sp._HY039	0	0	0	0	0	0	0	0	0	0	0	0	0	0	0	0	0	0	0	0
k__Bacteria	p__Bacteroidetes	c__Flavobacteriia	o__Flavobacteriales	f__Weeksellaceae	g__Bergeyella	s__Bergeyella_cardium	0	10	6	35	0	0	6	0	34	10	0	0	0	0	0	0	0	0	0	0
k__Bacteria	p__Bacteroidetes	c__Flavobacteriia	o__Flavobacteriales	f__Weeksellaceae	g__Bergeyella	s__Bergeyella_zoohelcum	0	47	4	16	0	0	0	0	3	18	0	0	0	0	0	0	0	0	0	0
k__Bacteria	p__Bacteroidetes	c__Flavobacteriia	o__Flavobacteriales	f__Weeksellaceae	g__Chishuiella	s__Chishuiella_changwenlii	41	0	0	0	0	0	0	0	0	40	0	0	0	0	0	0	0	0	0	0
k__Bacteria	p__Bacteroidetes	c__Flavobacteriia	o__Flavobacteriales	f__Weeksellaceae	g__Chryseobacterium	s__Candidatus_Chryseobacterium_massiliae	0	0	0	0	0	0	0	0	0	4	0	0	0	0	0	0	0	0	0	0
k__Bacteria	p__Bacteroidetes	c__Flavobacteriia	o__Flavobacteriales	f__Weeksellaceae	g__Chryseobacterium	s__Chryseobacterium_arachidis	0	0	4	0	0	0	0	0	0	0	0	0	0	0	0	0	0	0	0	0
k__Bacteria	p__Bacteroidetes	c__Flavobacteriia	o__Flavobacteriales	f__Weeksellaceae	g__Chryseobacterium	s__Chryseobacterium_aureum	0	0	0	0	0	0	0	0	4	0	0	0	0	0	0	0	0	0	0	0
k__Bacteria	p__Bacteroidetes	c__Flavobacteriia	o__Flavobacteriales	f__Weeksellaceae	g__Chryseobacterium	s__Chryseobacterium_bernardetii	0	0	3	0	0	0	0	0	0	0	0	0	0	0	0	6	0	0	0	4
k__Bacteria	p__Bacteroidetes	c__Flavobacteriia	o__Flavobacteriales	f__Weeksellaceae	g__Chryseobacterium	s__Chryseobacterium_carnipullorum	0	0	0	0	0	0	8	0	0	0	0	0	0	0	0	0	0	0	0	0
k__Bacteria	p__Bacteroidetes	c__Flavobacteriia	o__Flavobacteriales	f__Weeksellaceae	g__Chryseobacterium	s__Chryseobacterium_daeguense	0	0	0	0	0	0	0	0	0	4	0	0	0	0	0	0	0	0	0	0
k__Bacteria	p__Bacteroidetes	c__Flavobacteriia	o__Flavobacteriales	f__Weeksellaceae	g__Chryseobacterium	s__Chryseobacterium_defluvii	0	0	6	0	0	0	0	0	0	8	0	0	0	0	0	0	0	0	0	0
k__Bacteria	p__Bacteroidetes	c__Flavobacteriia	o__Flavobacteriales	f__Weeksellaceae	g__Chryseobacterium	s__Chryseobacterium_gambrini	0	0	0	5	0	0	0	0	0	0	0	0	0	0	0	0	0	0	0	0
k__Bacteria	p__Bacteroidetes	c__Flavobacteriia	o__Flavobacteriales	f__Weeksellaceae	g__Chryseobacterium	s__Chryseobacterium_glaciei	0	0	0	0	0	0	0	0	0	0	0	0	0	0	0	0	0	0	0	0
k__Bacteria	p__Bacteroidetes	c__Flavobacteriia	o__Flavobacteriales	f__Weeksellaceae	g__Chryseobacterium	s__Chryseobacterium_gleum	0	0	4	0	0	0	0	0	0	5	0	0	0	0	0	0	0	0	0	0
k__Bacteria	p__Bacteroidetes	c__Flavobacteriia	o__Flavobacteriales	f__Weeksellaceae	g__Chryseobacterium	s__Chryseobacterium_hispalense	0	0	0	0	0	0	0	0	0	6	0	0	0	0	0	0	0	0	0	0
k__Bacteria	p__Bacteroidetes	c__Flavobacteriia	o__Flavobacteriales	f__Weeksellaceae	g__Chryseobacterium	s__Chryseobacterium_humi	0	0	0	0	0	0	0	0	0	13	0	0	0	0	0	0	0	0	0	0
k__Bacteria	p__Bacteroidetes	c__Flavobacteriia	o__Flavobacteriales	f__Weeksellaceae	g__Chryseobacterium	s__Chryseobacterium_indologenes	8	0	3	8	0	0	0	0	0	0	0	0	0	0	0	0	0	0	0	0
k__Bacteria	p__Bacteroidetes	c__Flavobacteriia	o__Flavobacteriales	f__Weeksellaceae	g__Chryseobacterium	s__Chryseobacterium_indoltheticum	0	0	0	46	0	0	0	0	0	3	0	0	0	0	0	0	0	0	0	0
k__Bacteria	p__Bacteroidetes	c__Flavobacteriia	o__Flavobacteriales	f__Weeksellaceae	g__Chryseobacterium	s__Chryseobacterium_joostei	0	0	0	3	0	0	0	0	0	0	0	0	0	0	0	0	0	0	0	0
k__Bacteria	p__Bacteroidetes	c__Flavobacteriia	o__Flavobacteriales	f__Weeksellaceae	g__Chryseobacterium	s__Chryseobacterium_koreense	5	0	0	0	0	0	0	0	0	0	0	0	0	0	0	0	0	0	0	0
k__Bacteria	p__Bacteroidetes	c__Flavobacteriia	o__Flavobacteriales	f__Weeksellaceae	g__Chryseobacterium	s__Chryseobacterium_lacus	0	0	0	4	0	0	0	0	0	61	0	0	0	0	0	0	0	0	0	0
k__Bacteria	p__Bacteroidetes	c__Flavobacteriia	o__Flavobacteriales	f__Weeksellaceae	g__Chryseobacterium	s__Chryseobacterium_limigenitum	0	0	0	0	0	0	7	0	4	0	0	0	0	0	0	0	0	0	0	0
k__Bacteria	p__Bacteroidetes	c__Flavobacteriia	o__Flavobacteriales	f__Weeksellaceae	g__Chryseobacterium	s__Chryseobacterium_mucoviscidosis	0	14	0	0	0	0	0	0	0	0	0	0	0	0	0	0	0	0	0	0
k__Bacteria	p__Bacteroidetes	c__Flavobacteriia	o__Flavobacteriales	f__Weeksellaceae	g__Chryseobacterium	s__Chryseobacterium_nematophagum	0	0	0	0	0	0	0	0	0	17	0	0	0	0	0	0	0	0	0	0
k__Bacteria	p__Bacteroidetes	c__Flavobacteriia	o__Flavobacteriales	f__Weeksellaceae	g__Chryseobacterium	s__Chryseobacterium_oranimense	0	0	0	0	0	0	4	0	0	0	0	0	0	0	0	0	0	0	0	0
k__Bacteria	p__Bacteroidetes	c__Flavobacteriia	o__Flavobacteriales	f__Weeksellaceae	g__Chryseobacterium	s__Chryseobacterium_pennae	0	0	0	8	0	0	0	0	0	0	0	0	0	0	0	0	0	0	0	0
k__Bacteria	p__Bacteroidetes	c__Flavobacteriia	o__Flavobacteriales	f__Weeksellaceae	g__Chryseobacterium	s__Chryseobacterium_phosphatilyticum	4	0	0	0	0	0	0	0	0	0	0	0	0	0	0	0	0	0	0	0
k__Bacteria	p__Bacteroidetes	c__Flavobacteriia	o__Flavobacteriales	f__Weeksellaceae	g__Chryseobacterium	s__Chryseobacterium_piperi	0	0	0	7	0	0	0	0	0	7	0	0	0	0	0	0	0	0	0	0
k__Bacteria	p__Bacteroidetes	c__Flavobacteriia	o__Flavobacteriales	f__Weeksellaceae	g__Chryseobacterium	s__Chryseobacterium_piscicola	0	0	3	6	0	0	0	0	0	0	0	0	0	0	0	0	0	0	0	0
k__Bacteria	p__Bacteroidetes	c__Flavobacteriia	o__Flavobacteriales	f__Weeksellaceae	g__Chryseobacterium	s__Chryseobacterium_scophthalmum	0	0	0	4	0	0	0	0	0	0	0	0	0	0	0	0	0	0	0	0
k__Bacteria	p__Bacteroidetes	c__Flavobacteriia	o__Flavobacteriales	f__Weeksellaceae	g__Chryseobacterium	s__Chryseobacterium_senegalense	0	0	0	4	0	0	0	0	0	18	0	0	0	0	0	0	0	0	0	0
k__Bacteria	p__Bacteroidetes	c__Flavobacteriia	o__Flavobacteriales	f__Weeksellaceae	g__Chryseobacterium	s__Chryseobacterium_sp.	6	0	0	0	0	0	0	0	0	6	0	0	0	0	0	0	0	0	0	0
k__Bacteria	p__Bacteroidetes	c__Flavobacteriia	o__Flavobacteriales	f__Weeksellaceae	g__Chryseobacterium	s__Chryseobacterium_sp._3008163	0	0	0	6	0	0	0	0	0	0	0	0	0	0	0	0	0	0	0	0
k__Bacteria	p__Bacteroidetes	c__Flavobacteriia	o__Flavobacteriales	f__Weeksellaceae	g__Chryseobacterium	s__Chryseobacterium_sp._36_9	0	0	0	15	0	0	0	0	0	0	0	0	0	0	0	0	0	0	0	0
k__Bacteria	p__Bacteroidetes	c__Flavobacteriia	o__Flavobacteriales	f__Weeksellaceae	g__Chryseobacterium	s__Chryseobacterium_sp._39_10	0	4	0	0	0	0	0	0	0	3	0	0	0	0	0	0	0	0	0	0
k__Bacteria	p__Bacteroidetes	c__Flavobacteriia	o__Flavobacteriales	f__Weeksellaceae	g__Chryseobacterium	s__Chryseobacterium_sp._6424	0	0	3	0	0	0	0	0	0	0	0	0	0	0	0	0	0	0	0	0
k__Bacteria	p__Bacteroidetes	c__Flavobacteriia	o__Flavobacteriales	f__Weeksellaceae	g__Chryseobacterium	s__Chryseobacterium_sp._CF365	0	0	0	3	0	0	0	0	0	0	0	0	0	0	0	0	0	0	0	0
k__Bacteria	p__Bacteroidetes	c__Flavobacteriia	o__Flavobacteriales	f__Weeksellaceae	g__Chryseobacterium	s__Chryseobacterium_sp._CH21	0	0	0	0	0	0	0	0	0	0	0	0	0	0	0	0	0	0	0	0
k__Bacteria	p__Bacteroidetes	c__Flavobacteriia	o__Flavobacteriales	f__Weeksellaceae	g__Chryseobacterium	s__Chryseobacterium_sp._ERMR1_04	0	0	0	5	0	0	0	0	0	16	0	0	0	0	0	0	0	0	0	0
k__Bacteria	p__Bacteroidetes	c__Flavobacteriia	o__Flavobacteriales	f__Weeksellaceae	g__Chryseobacterium	s__Chryseobacterium_sp._FH1	0	0	0	0	0	0	0	0	0	0	0	0	0	0	0	0	0	0	0	0
k__Bacteria	p__Bacteroidetes	c__Flavobacteriia	o__Flavobacteriales	f__Weeksellaceae	g__Chryseobacterium	s__Chryseobacterium_sp._FH2	0	0	0	17	0	5	0	0	0	14	0	0	0	0	0	0	0	0	0	0
k__Bacteria	p__Bacteroidetes	c__Flavobacteriia	o__Flavobacteriales	f__Weeksellaceae	g__Chryseobacterium	s__Chryseobacterium_sp._FP211_J200	0	0	0	8	0	0	0	0	0	21	0	0	0	0	0	0	0	0	0	0
k__Bacteria	p__Bacteroidetes	c__Flavobacteriia	o__Flavobacteriales	f__Weeksellaceae	g__Chryseobacterium	s__Chryseobacterium_sp._G0186	12	0	0	0	0	0	0	0	36	0	0	0	0	0	0	0	0	0	0	0
k__Bacteria	p__Bacteroidetes	c__Flavobacteriia	o__Flavobacteriales	f__Weeksellaceae	g__Chryseobacterium	s__Chryseobacterium_sp._G0201	0	0	0	5	0	0	0	0	0	0	0	0	0	0	0	0	0	0	0	0
k__Bacteria	p__Bacteroidetes	c__Flavobacteriia	o__Flavobacteriales	f__Weeksellaceae	g__Chryseobacterium	s__Chryseobacterium_sp._G0240	3	0	0	0	0	0	0	0	0	0	0	0	0	0	0	0	0	0	0	0
k__Bacteria	p__Bacteroidetes	c__Flavobacteriia	o__Flavobacteriales	f__Weeksellaceae	g__Chryseobacterium	s__Chryseobacterium_sp._Hurlbut01	0	0	3	0	0	0	0	0	0	0	0	0	0	0	0	0	0	0	0	0
k__Bacteria	p__Bacteroidetes	c__Flavobacteriia	o__Flavobacteriales	f__Weeksellaceae	g__Chryseobacterium	s__Chryseobacterium_sp._IHB_B_17019	0	0	0	3	0	0	0	0	0	35	0	0	0	0	0	0	0	0	0	0
k__Bacteria	p__Bacteroidetes	c__Flavobacteriia	o__Flavobacteriales	f__Weeksellaceae	g__Chryseobacterium	s__Chryseobacterium_sp._Leaf180	0	0	0	0	0	0	0	0	0	0	0	0	0	0	0	0	0	0	0	0
k__Bacteria	p__Bacteroidetes	c__Flavobacteriia	o__Flavobacteriales	f__Weeksellaceae	g__Chryseobacterium	s__Chryseobacterium_sp._Leaf201	0	0	0	9	0	0	0	0	0	0	0	0	0	0	0	0	0	0	0	0
k__Bacteria	p__Bacteroidetes	c__Flavobacteriia	o__Flavobacteriales	f__Weeksellaceae	g__Chryseobacterium	s__Chryseobacterium_sp._Leaf394	0	0	0	0	0	0	0	0	0	18	0	0	0	0	0	0	0	0	0	0
k__Bacteria	p__Bacteroidetes	c__Flavobacteriia	o__Flavobacteriales	f__Weeksellaceae	g__Chryseobacterium	s__Chryseobacterium_sp._MYb7	0	0	0	4	0	0	0	0	0	0	0	0	0	0	0	0	0	0	0	0
k__Bacteria	p__Bacteroidetes	c__Flavobacteriia	o__Flavobacteriales	f__Weeksellaceae	g__Chryseobacterium	s__Chryseobacterium_sp._OV705	0	0	0	11	0	0	0	0	0	0	0	0	0	0	0	0	0	0	0	0
k__Bacteria	p__Bacteroidetes	c__Flavobacteriia	o__Flavobacteriales	f__Weeksellaceae	g__Chryseobacterium	s__Chryseobacterium_sp._RU37D	0	0	4	0	0	0	0	0	0	0	0	0	0	0	0	0	0	0	0	0
k__Bacteria	p__Bacteroidetes	c__Flavobacteriia	o__Flavobacteriales	f__Weeksellaceae	g__Chryseobacterium	s__Chryseobacterium_sp._SC28	0	0	0	0	0	0	0	0	0	5	0	0	0	0	0	0	0	0	0	0
k__Bacteria	p__Bacteroidetes	c__Flavobacteriia	o__Flavobacteriales	f__Weeksellaceae	g__Chryseobacterium	s__Chryseobacterium_sp._T16E_39	0	0	0	4	0	0	0	0	0	0	0	0	0	0	0	0	0	0	0	0
k__Bacteria	p__Bacteroidetes	c__Flavobacteriia	o__Flavobacteriales	f__Weeksellaceae	g__Chryseobacterium	s__Chryseobacterium_sp._UNC8MFCol	0	0	3	0	0	0	0	0	0	0	0	0	0	0	0	0	0	0	0	0
k__Bacteria	p__Bacteroidetes	c__Flavobacteriia	o__Flavobacteriales	f__Weeksellaceae	g__Chryseobacterium	s__Chryseobacterium_sp._VAUSW3	0	0	0	0	0	0	0	0	0	6	0	0	0	0	0	0	0	0	0	0
k__Bacteria	p__Bacteroidetes	c__Flavobacteriia	o__Flavobacteriales	f__Weeksellaceae	g__Chryseobacterium	s__Chryseobacterium_sp._YR460	0	0	0	0	0	0	0	0	0	13	0	0	0	0	0	0	0	0	0	0
k__Bacteria	p__Bacteroidetes	c__Flavobacteriia	o__Flavobacteriales	f__Weeksellaceae	g__Chryseobacterium	s__Chryseobacterium_taichungense	0	0	0	3	0	0	0	0	0	0	0	0	0	0	0	0	0	0	0	0
k__Bacteria	p__Bacteroidetes	c__Flavobacteriia	o__Flavobacteriales	f__Weeksellaceae	g__Chryseobacterium	s__Chryseobacterium_taklimakanense	0	0	0	9	0	0	0	0	3	0	0	0	0	0	0	0	0	0	0	0
k__Bacteria	p__Bacteroidetes	c__Flavobacteriia	o__Flavobacteriales	f__Weeksellaceae	g__Chryseobacterium	s__Chryseobacterium_wanjuense	0	0	0	0	0	0	0	0	3	0	0	0	0	0	0	0	0	0	0	0
k__Bacteria	p__Bacteroidetes	c__Flavobacteriia	o__Flavobacteriales	f__Weeksellaceae	g__Chryseobacterium	s__Unclassified	0	0	0	77	0	0	0	0	0	20	0	0	0	0	0	0	0	0	0	0
k__Bacteria	p__Bacteroidetes	c__Flavobacteriia	o__Flavobacteriales	f__Weeksellaceae	g__Cloacibacterium	s__Cloacibacterium_normanense	4	4	0	14	0	0	0	0	26	20	0	0	0	0	0	0	0	0	0	0
k__Bacteria	p__Bacteroidetes	c__Flavobacteriia	o__Flavobacteriales	f__Weeksellaceae	g__Elizabethkingia	s__Elizabethkingia_anophelis	0	6	0	44	0	0	0	0	0	6	0	0	0	0	0	0	0	0	0	0
k__Bacteria	p__Bacteroidetes	c__Flavobacteriia	o__Flavobacteriales	f__Weeksellaceae	g__Elizabethkingia	s__Elizabethkingia_meningoseptica	8	0	3	0	0	0	0	0	0	6	0	0	0	0	0	0	0	0	0	0
k__Bacteria	p__Bacteroidetes	c__Flavobacteriia	o__Flavobacteriales	f__Weeksellaceae	g__Elizabethkingia	s__Elizabethkingia_miricola	0	0	0	0	0	0	0	0	0	7	0	0	0	0	0	0	0	0	0	0
k__Bacteria	p__Bacteroidetes	c__Flavobacteriia	o__Flavobacteriales	f__Weeksellaceae	g__Elizabethkingia	s__Elizabethkingia_occulta	0	0	0	8	0	0	0	0	0	0	0	0	0	0	0	0	0	0	0	0
k__Bacteria	p__Bacteroidetes	c__Flavobacteriia	o__Flavobacteriales	f__Weeksellaceae	g__Elizabethkingia	s__Unclassified	0	0	0	0	0	0	0	0	0	7	0	0	0	0	0	0	0	0	0	0
k__Bacteria	p__Bacteroidetes	c__Flavobacteriia	o__Flavobacteriales	f__Weeksellaceae	g__Empedobacter	s__Empedobacter_brevis	0	0	0	23	0	0	0	0	0	0	0	0	0	0	0	0	0	0	0	0
k__Bacteria	p__Bacteroidetes	c__Flavobacteriia	o__Flavobacteriales	f__Weeksellaceae	g__Empedobacter	s__Empedobacter_falsenii	0	4	0	0	0	0	0	0	0	0	0	0	0	0	0	0	0	0	0	0
k__Bacteria	p__Bacteroidetes	c__Flavobacteriia	o__Flavobacteriales	f__Weeksellaceae	g__Epilithonimonas	s__Epilithonimonas_arachidiradicis	3	0	0	0	0	0	0	0	0	0	0	0	0	0	0	0	0	0	0	0
k__Bacteria	p__Bacteroidetes	c__Flavobacteriia	o__Flavobacteriales	f__Weeksellaceae	g__Epilithonimonas	s__Epilithonimonas_bovis	0	0	0	0	0	0	0	0	0	4	0	0	0	0	0	0	0	0	0	0
k__Bacteria	p__Bacteroidetes	c__Flavobacteriia	o__Flavobacteriales	f__Weeksellaceae	g__Epilithonimonas	s__Epilithonimonas_caeni	0	0	4	0	0	0	0	0	0	0	0	0	0	0	0	0	0	0	0	0
k__Bacteria	p__Bacteroidetes	c__Flavobacteriia	o__Flavobacteriales	f__Weeksellaceae	g__Epilithonimonas	s__Epilithonimonas_hispanica	0	0	0	0	0	0	0	0	0	0	0	0	0	0	0	0	0	0	0	0
k__Bacteria	p__Bacteroidetes	c__Flavobacteriia	o__Flavobacteriales	f__Weeksellaceae	g__Epilithonimonas	s__Epilithonimonas_lactis	0	0	0	0	0	0	0	0	0	0	0	0	0	0	0	0	0	0	0	0
k__Bacteria	p__Bacteroidetes	c__Flavobacteriia	o__Flavobacteriales	f__Weeksellaceae	g__Epilithonimonas	s__Epilithonimonas_tenax	0	0	0	4	0	0	0	0	5	0	0	0	0	0	0	0	0	0	0	0
k__Bacteria	p__Bacteroidetes	c__Flavobacteriia	o__Flavobacteriales	f__Weeksellaceae	g__Epilithonimonas	s__Epilithonimonas_vandammei	8	0	0	0	0	0	0	0	0	0	0	0	0	0	0	0	0	0	0	0
k__Bacteria	p__Bacteroidetes	c__Flavobacteriia	o__Flavobacteriales	f__Weeksellaceae	g__Kaistella	s__Kaistella_antarctica	0	0	0	20	0	0	0	0	3	3	0	0	0	0	0	0	0	0	0	0
k__Bacteria	p__Bacteroidetes	c__Flavobacteriia	o__Flavobacteriales	f__Weeksellaceae	g__Kaistella	s__Kaistella_chaponensis	0	0	0	0	0	0	0	0	5	0	0	0	0	0	0	0	0	0	0	0
k__Bacteria	p__Bacteroidetes	c__Flavobacteriia	o__Flavobacteriales	f__Weeksellaceae	g__Kaistella	s__Kaistella_daneshvariae	0	0	0	3	0	0	0	0	0	0	0	0	0	0	0	0	0	0	0	0
k__Bacteria	p__Bacteroidetes	c__Flavobacteriia	o__Flavobacteriales	f__Weeksellaceae	g__Kaistella	s__Kaistella_haifensis	11	0	0	13	0	0	0	0	0	0	0	0	0	0	0	0	0	0	0	0
k__Bacteria	p__Bacteroidetes	c__Flavobacteriia	o__Flavobacteriales	f__Weeksellaceae	g__Ornithobacterium	s__Candidatus_Ornithobacterium_hominis	8	0	4	32	0	53	0	0	9	78	0	0	0	0	0	0	0	0	0	0
k__Bacteria	p__Bacteroidetes	c__Flavobacteriia	o__Flavobacteriales	f__Weeksellaceae	g__Ornithobacterium	s__Ornithobacterium_rhinotracheale	0	0	0	5	0	0	0	0	16	16	0	0	0	0	0	0	0	0	0	0
k__Bacteria	p__Bacteroidetes	c__Flavobacteriia	o__Flavobacteriales	f__Weeksellaceae	g__Riemerella	s__Riemerella_anatipestifer	0	3	0	51	0	0	0	0	9	62	0	0	0	0	0	0	0	0	0	0
k__Bacteria	p__Bacteroidetes	c__Flavobacteriia	o__Flavobacteriales	f__Weeksellaceae	g__Riemerella	s__Riemerella_columbina	7	0	4	29	0	0	0	0	0	52	0	0	0	0	0	0	0	0	0	0
k__Bacteria	p__Bacteroidetes	c__Flavobacteriia	o__Flavobacteriales	f__Weeksellaceae	g__Riemerella	s__Riemerella_columbipharyngis	18	109	3	41	0	0	0	0	3	60	0	0	0	0	0	0	0	0	0	0
k__Bacteria	p__Bacteroidetes	c__Flavobacteriia	o__Flavobacteriales	f__Weeksellaceae	g__Riemerella	s__Riemerella_sp.	99	150	87	602	0	0	0	0	39	653	0	0	0	0	0	0	0	0	0	0
k__Bacteria	p__Bacteroidetes	c__Flavobacteriia	o__Flavobacteriales	f__Weeksellaceae	g__Riemerella	s__Unclassified	0	0	0	16	0	0	0	0	0	0	0	0	0	0	0	0	0	0	0	0
k__Bacteria	p__Bacteroidetes	c__Flavobacteriia	o__Flavobacteriales	f__Weeksellaceae	g__Soonwooa	s__Soonwooa_buanensis	0	3	0	29	0	0	0	0	7	0	0	0	0	0	0	0	0	0	0	0
k__Bacteria	p__Bacteroidetes	c__Flavobacteriia	o__Flavobacteriales	f__Weeksellaceae	g__Unclassified	s__Unclassified	112	0	0	38	0	0	0	0	62	12	0	0	0	0	0	0	0	0	0	0
k__Bacteria	p__Bacteroidetes	c__Flavobacteriia	o__Flavobacteriales	f__Weeksellaceae	g__Weeksella	s__Weeksella_massiliensis	0	0	0	12	0	0	0	0	3	0	0	0	0	0	0	0	0	0	0	0
k__Bacteria	p__Bacteroidetes	c__Flavobacteriia	o__Flavobacteriales	f__Weeksellaceae	g__Weeksella	s__Weeksella_virosa	0	0	0	5	0	0	0	0	0	4	0	0	0	0	0	0	0	0	0	0
k__Bacteria	p__Bacteroidetes	c__Flavobacteriia	o__Unclassified	f__Unclassified	g__Unclassified	s__Flavobacteria_bacterium_MS024_2A	0	0	0	17	0	0	0	0	0	0	0	0	0	0	0	0	0	0	0	0
k__Bacteria	p__Bacteroidetes	c__Flavobacteriia	o__Unclassified	f__Unclassified	g__Unclassified	s__Flavobacteria_bacterium_RIFCSPLOWO2_12_FULL_31_7	0	0	0	0	0	0	0	0	7	0	0	0	0	0	0	0	0	0	0	0
k__Bacteria	p__Bacteroidetes	c__Flavobacteriia	o__Unclassified	f__Unclassified	g__Unclassified	s__Flavobacteria_bacterium_RIFCSPLOWO2_12_FULL_35_11	0	0	0	0	0	0	0	0	0	0	0	0	0	0	0	0	0	0	0	0
k__Bacteria	p__Bacteroidetes	c__Flavobacteriia	o__Unclassified	f__Unclassified	g__Unclassified	s__Flavobacteriia_bacterium	0	0	0	33	0	0	0	0	0	6	0	0	0	0	0	0	0	0	0	0
k__Bacteria	p__Bacteroidetes	c__Saprospiria	o__Saprospirales	f__Haliscomenobacteraceae	g__Phaeodactylibacter	s__Phaeodactylibacter_xiamenensis	0	0	0	4	0	0	0	0	0	0	0	0	0	0	0	0	0	0	0	0
k__Bacteria	p__Bacteroidetes	c__Saprospiria	o__Saprospirales	f__Lewinellaceae	g__Flavilitoribacter	s__Flavilitoribacter_nigricans	0	0	0	4	0	0	0	0	0	0	0	0	0	0	0	0	0	0	0	0
k__Bacteria	p__Bacteroidetes	c__Saprospiria	o__Saprospirales	f__Lewinellaceae	g__Lewinella	s__Lewinella_cohaerens	7	0	0	6	0	0	0	0	0	3	0	0	0	0	0	0	0	0	0	0
k__Bacteria	p__Bacteroidetes	c__Saprospiria	o__Saprospirales	f__Lewinellaceae	g__Lewinella	s__Lewinella_marina	0	0	0	18	0	0	0	0	0	0	0	0	0	0	0	0	0	0	0	0
k__Bacteria	p__Bacteroidetes	c__Saprospiria	o__Saprospirales	f__Lewinellaceae	g__Lewinella	s__Lewinella_sp._4G2	10	0	0	0	0	0	0	0	3	0	0	0	0	0	0	0	0	0	0	0
k__Bacteria	p__Bacteroidetes	c__Saprospiria	o__Saprospirales	f__Lewinellaceae	g__Lewinella	s__Lewinella_sp._IMCC34183	0	0	0	0	0	0	0	0	0	0	0	0	0	0	0	0	0	0	4	0
k__Bacteria	p__Bacteroidetes	c__Saprospiria	o__Saprospirales	f__Saprospiraceae	g__Aureispira	s__Aureispira_sp._CCB_QB1	0	5	0	0	0	0	0	0	0	0	0	0	0	0	0	0	0	0	0	0
k__Bacteria	p__Bacteroidetes	c__Saprospiria	o__Saprospirales	f__Unclassified	g__Unclassified	s__Saprospirales_bacterium_TMED214	0	0	0	0	0	0	0	0	0	7	0	0	0	0	0	0	0	0	0	0
k__Bacteria	p__Bacteroidetes	c__Sphingobacteriia	o__Sphingobacteriales	f__Sphingobacteriaceae	g__Daejeonella	s__Daejeonella_lutea	0	0	0	20	0	0	0	0	0	0	0	0	0	0	0	0	0	0	0	0
k__Bacteria	p__Bacteroidetes	c__Sphingobacteriia	o__Sphingobacteriales	f__Sphingobacteriaceae	g__Mucilaginibacter	s__Mucilaginibacter_gotjawali	0	0	0	0	0	0	0	0	0	0	0	0	0	0	0	0	0	0	6	0
k__Bacteria	p__Bacteroidetes	c__Sphingobacteriia	o__Sphingobacteriales	f__Sphingobacteriaceae	g__Mucilaginibacter	s__Mucilaginibacter_hurinus	28	0	133	115	605	252	22	526	59	59	0	182	90	10	471	73	274	6	78	135
k__Bacteria	p__Bacteroidetes	c__Sphingobacteriia	o__Sphingobacteriales	f__Sphingobacteriaceae	g__Mucilaginibacter	s__Mucilaginibacter_kameinonensis	0	15	0	13	0	0	0	0	0	0	0	0	0	0	0	0	0	0	0	0
k__Bacteria	p__Bacteroidetes	c__Sphingobacteriia	o__Sphingobacteriales	f__Sphingobacteriaceae	g__Mucilaginibacter	s__Mucilaginibacter_lappiensis	0	0	0	13	0	0	0	0	0	0	0	0	0	0	0	0	0	0	0	0
k__Bacteria	p__Bacteroidetes	c__Sphingobacteriia	o__Sphingobacteriales	f__Sphingobacteriaceae	g__Mucilaginibacter	s__Mucilaginibacter_mallensis	0	0	0	13	0	0	0	0	0	0	0	0	0	0	0	0	0	0	0	0
k__Bacteria	p__Bacteroidetes	c__Sphingobacteriia	o__Sphingobacteriales	f__Sphingobacteriaceae	g__Mucilaginibacter	s__Mucilaginibacter_sp._OK268	0	0	0	0	0	0	0	0	0	0	0	0	0	0	0	0	0	0	0	0
k__Bacteria	p__Bacteroidetes	c__Sphingobacteriia	o__Sphingobacteriales	f__Sphingobacteriaceae	g__Mucilaginibacter	s__Mucilaginibacter_terrenus	0	0	0	15	0	0	0	0	0	0	0	0	0	0	0	0	0	0	0	0
k__Bacteria	p__Bacteroidetes	c__Sphingobacteriia	o__Sphingobacteriales	f__Sphingobacteriaceae	g__Olivibacter	s__Olivibacter_sitiensis	0	0	0	219	0	0	0	0	0	0	0	0	0	0	0	0	0	0	0	0
k__Bacteria	p__Bacteroidetes	c__Sphingobacteriia	o__Sphingobacteriales	f__Sphingobacteriaceae	g__Pararcticibacter	s__Pararcticibacter_amylolyticus	0	0	0	0	0	0	0	8	0	0	0	0	0	0	0	0	0	0	0	0
k__Bacteria	p__Bacteroidetes	c__Sphingobacteriia	o__Sphingobacteriales	f__Sphingobacteriaceae	g__Pedobacter	s__Pedobacter_alluvionis	0	0	0	9	0	0	0	0	0	0	0	0	0	0	0	0	0	0	0	0
k__Bacteria	p__Bacteroidetes	c__Sphingobacteriia	o__Sphingobacteriales	f__Sphingobacteriaceae	g__Pedobacter	s__Pedobacter_arcticus	0	0	0	17	0	0	0	0	0	0	0	0	0	0	0	0	0	0	0	0
k__Bacteria	p__Bacteroidetes	c__Sphingobacteriia	o__Sphingobacteriales	f__Sphingobacteriaceae	g__Pedobacter	s__Pedobacter_cryoconitis	0	0	0	46	0	0	0	0	0	0	0	0	0	0	0	0	0	0	0	0
k__Bacteria	p__Bacteroidetes	c__Sphingobacteriia	o__Sphingobacteriales	f__Sphingobacteriaceae	g__Pedobacter	s__Pedobacter_glucosidilyticus	0	0	0	17	0	0	0	0	0	0	0	0	0	0	0	0	0	0	0	0
k__Bacteria	p__Bacteroidetes	c__Sphingobacteriia	o__Sphingobacteriales	f__Sphingobacteriaceae	g__Pedobacter	s__Pedobacter_jeongneungensis	0	0	0	11	0	0	0	0	0	0	0	0	0	0	0	0	0	0	0	0
k__Bacteria	p__Bacteroidetes	c__Sphingobacteriia	o__Sphingobacteriales	f__Sphingobacteriaceae	g__Pedobacter	s__Pedobacter_kyonggii	0	0	0	0	0	0	0	0	0	10	0	0	0	0	0	0	0	0	0	0
k__Bacteria	p__Bacteroidetes	c__Sphingobacteriia	o__Sphingobacteriales	f__Sphingobacteriaceae	g__Pedobacter	s__Pedobacter_nyackensis	23	0	0	0	0	0	0	0	0	0	0	0	0	0	0	0	0	0	0	0
k__Bacteria	p__Bacteroidetes	c__Sphingobacteriia	o__Sphingobacteriales	f__Sphingobacteriaceae	g__Pedobacter	s__Pedobacter_panaciterrae	702	1946	0	1646	0	3648	0	2726	111	0	0	0	193	1650	2706	0	463	0	0	0
k__Bacteria	p__Bacteroidetes	c__Sphingobacteriia	o__Sphingobacteriales	f__Sphingobacteriaceae	g__Pedobacter	s__Pedobacter_rhizosphaerae	21	0	0	0	0	0	0	0	0	0	0	0	0	0	0	0	0	0	0	0
k__Bacteria	p__Bacteroidetes	c__Sphingobacteriia	o__Sphingobacteriales	f__Sphingobacteriaceae	g__Pedobacter	s__Pedobacter_sp.	0	3	12	22	0	0	0	0	0	3	0	0	0	0	0	0	0	0	0	0
k__Bacteria	p__Bacteroidetes	c__Sphingobacteriia	o__Sphingobacteriales	f__Sphingobacteriaceae	g__Pedobacter	s__Pedobacter_sp._KBW06	0	0	0	18	0	0	0	0	0	0	0	0	0	0	0	0	0	0	0	0
k__Bacteria	p__Bacteroidetes	c__Sphingobacteriia	o__Sphingobacteriales	f__Sphingobacteriaceae	g__Pedobacter	s__Pedobacter_sp._Leaf216	0	0	0	0	0	0	0	0	0	0	0	0	0	0	0	0	0	0	0	0
k__Bacteria	p__Bacteroidetes	c__Sphingobacteriia	o__Sphingobacteriales	f__Sphingobacteriaceae	g__Pedobacter	s__Pedobacter_sp._Leaf41	0	0	0	5	0	0	0	0	0	0	0	0	0	0	0	0	0	0	0	0
k__Bacteria	p__Bacteroidetes	c__Sphingobacteriia	o__Sphingobacteriales	f__Sphingobacteriaceae	g__Pedobacter	s__Pedobacter_sp._YR510	0	0	0	0	0	0	0	0	0	5	0	0	0	0	0	0	0	0	0	0
k__Bacteria	p__Bacteroidetes	c__Sphingobacteriia	o__Sphingobacteriales	f__Sphingobacteriaceae	g__Pedobacter	s__Pedobacter_terrae	0	34	0	0	0	0	0	0	0	0	0	0	0	0	0	0	0	0	0	0
k__Bacteria	p__Bacteroidetes	c__Sphingobacteriia	o__Sphingobacteriales	f__Sphingobacteriaceae	g__Pedobacter	s__Pedobacter_xixiisoli	0	0	0	0	0	0	0	0	0	0	0	0	0	0	0	0	0	0	0	0
k__Bacteria	p__Bacteroidetes	c__Sphingobacteriia	o__Sphingobacteriales	f__Sphingobacteriaceae	g__Pseudopedobacter	s__Pseudopedobacter_saltans	0	0	0	17	0	0	0	0	0	0	0	0	0	0	0	0	0	0	0	0
k__Bacteria	p__Bacteroidetes	c__Sphingobacteriia	o__Sphingobacteriales	f__Sphingobacteriaceae	g__Solitalea	s__Solitalea_longa	0	2	0	0	0	0	0	0	0	2	0	0	0	0	0	0	0	0	0	0
k__Bacteria	p__Bacteroidetes	c__Sphingobacteriia	o__Sphingobacteriales	f__Sphingobacteriaceae	g__Sphingobacterium	s__Sphingobacterium_faecium	0	0	0	17	0	0	0	0	0	0	0	0	0	0	0	0	0	0	0	0
k__Bacteria	p__Bacteroidetes	c__Sphingobacteriia	o__Sphingobacteriales	f__Sphingobacteriaceae	g__Sphingobacterium	s__Sphingobacterium_nematocida	0	0	3	0	0	0	0	0	0	0	0	0	0	0	0	0	0	0	0	0
k__Bacteria	p__Bacteroidetes	c__Sphingobacteriia	o__Sphingobacteriales	f__Sphingobacteriaceae	g__Sphingobacterium	s__Sphingobacterium_paucimobilis	0	0	0	0	0	0	0	0	0	8	0	0	0	0	0	0	0	0	0	0
k__Bacteria	p__Bacteroidetes	c__Sphingobacteriia	o__Sphingobacteriales	f__Sphingobacteriaceae	g__Sphingobacterium	s__Sphingobacterium_sp._HMA12	0	0	0	0	0	0	0	11	0	0	0	0	0	0	0	0	0	0	0	0
k__Bacteria	p__Bacteroidetes	c__Sphingobacteriia	o__Sphingobacteriales	f__Sphingobacteriaceae	g__Sphingobacterium	s__Sphingobacterium_sp._ML3W	3	0	0	0	0	0	0	0	0	0	0	0	0	0	0	0	0	0	0	0
k__Bacteria	p__Bacteroidetes	c__Sphingobacteriia	o__Sphingobacteriales	f__Sphingobacteriaceae	g__Sphingobacterium	s__Sphingobacterium_spiritivorum	0	0	0	4	0	0	7	0	0	7	0	0	0	0	0	0	0	0	0	0
k__Bacteria	p__Bacteroidetes	c__Sphingobacteriia	o__Sphingobacteriales	f__Sphingobacteriaceae	g__Sphingobacterium	s__Sphingobacterium_wenxiniae	0	0	0	7	0	0	0	0	0	0	0	0	0	0	0	0	0	0	0	0
k__Bacteria	p__Bacteroidetes	c__Sphingobacteriia	o__Sphingobacteriales	f__Sphingobacteriaceae	g__Unclassified	s__Sphingobacteriaceae_bacterium	0	0	0	3	0	0	0	0	0	0	0	0	0	0	0	0	0	0	0	0
k__Bacteria	p__Bacteroidetes	c__Sphingobacteriia	o__Sphingobacteriales	f__Sphingobacteriaceae	g__Unclassified	s__Sphingobacteriaceae_bacterium_DW12	0	0	0	6	0	0	0	0	0	0	0	0	0	0	0	0	0	0	0	0
k__Bacteria	p__Bacteroidetes	c__Sphingobacteriia	o__Sphingobacteriales	f__Unclassified	g__Unclassified	s__Sphingobacteriales_bacterium	0	0	0	10	0	0	0	0	0	0	0	0	0	0	0	0	0	0	0	0
k__Bacteria	p__Bacteroidetes	c__Sphingobacteriia	o__Sphingobacteriales	f__Unclassified	g__Unclassified	s__Sphingobacteriales_bacterium_44_61	0	0	0	0	0	0	0	0	0	38	0	0	0	0	0	0	0	0	0	0
k__Bacteria	p__Bacteroidetes	c__Sphingobacteriia	o__Sphingobacteriales	f__Unclassified	g__Unclassified	s__Sphingobacteriales_bacterium_46_32	0	0	0	0	0	0	0	0	0	7	0	0	0	0	0	0	0	0	0	0
k__Bacteria	p__Bacteroidetes	c__Sphingobacteriia	o__Sphingobacteriales	f__Unclassified	g__Unclassified	s__Sphingobacteriales_bacterium_UPWRP_1	0	0	0	19	0	0	0	0	0	0	0	0	0	0	0	0	0	0	0	0
k__Bacteria	p__Bacteroidetes	c__Sphingobacteriia	o__Unclassified	f__Unclassified	g__Unclassified	s__Sphingobacteriia_bacterium_RIFOXYC2_FULL_35_18	0	4	0	0	0	0	0	0	0	0	0	0	0	0	0	0	0	0	0	0
k__Bacteria	p__Bacteroidetes	c__Unclassified	o__Bacteroidetes_Order_II._Incertae_sedis	f__Rhodothermaceae	g__Rhodothermus	s__Rhodothermus_marinus	0	0	8	0	0	0	0	16	22	0	0	0	0	0	15	0	20	15	0	10
k__Bacteria	p__Bacteroidetes	c__Unclassified	o__Bacteroidetes_Order_II._Incertae_sedis	f__Rhodothermaceae	g__Rhodothermus	s__Rhodothermus_profundi	4	0	0	0	0	0	0	0	0	0	0	0	0	0	31	0	0	0	0	0
k__Bacteria	p__Bacteroidetes	c__Unclassified	o__Bacteroidetes_Order_II._Incertae_sedis	f__Rhodothermaceae	g__Salinibacter	s__Salinibacter_ruber	0	0	0	17	0	0	0	0	0	0	0	0	0	0	0	0	0	0	0	0
k__Bacteria	p__Bacteroidetes	c__Unclassified	o__Bacteroidetes_Order_II._Incertae_sedis	f__Rhodothermaceae	g__Salinibacter	s__Salinibacter_sp._10B	0	0	0	0	5	0	0	0	0	0	0	0	0	0	0	0	0	0	0	0
k__Bacteria	p__Bacteroidetes	c__Unclassified	o__Unclassified	f__Unclassified	g__Unclassified	s__Bacteroidetes_bacterium	0	114	7	4414	0	0	3	3	62	166	0	0	5	0	0	0	0	0	21	0
k__Bacteria	p__Bacteroidetes	c__Unclassified	o__Unclassified	f__Unclassified	g__Unclassified	s__Bacteroidetes_bacterium_38_7	0	0	0	0	0	0	0	0	0	0	0	0	0	0	0	0	0	0	0	0
k__Bacteria	p__Bacteroidetes	c__Unclassified	o__Unclassified	f__Unclassified	g__Unclassified	s__Bacteroidetes_bacterium_41_46	0	3	0	10	0	0	0	0	4	0	0	0	0	0	0	0	0	0	0	0
k__Bacteria	p__Bacteroidetes	c__Unclassified	o__Unclassified	f__Unclassified	g__Unclassified	s__Bacteroidetes_bacterium_43_93	0	0	0	0	0	0	0	0	4	0	0	0	0	0	0	0	0	0	0	0
k__Bacteria	p__Bacteroidetes	c__Unclassified	o__Unclassified	f__Unclassified	g__Unclassified	s__Bacteroidetes_bacterium_4484_249	0	0	0	25	0	0	0	0	0	0	0	0	0	0	0	0	0	0	0	0
k__Bacteria	p__Bacteroidetes	c__Unclassified	o__Unclassified	f__Unclassified	g__Unclassified	s__Bacteroidetes_bacterium_4572_112	0	0	0	15	0	0	0	0	0	0	0	0	0	0	0	0	0	0	0	0
k__Bacteria	p__Bacteroidetes	c__Unclassified	o__Unclassified	f__Unclassified	g__Unclassified	s__Bacteroidetes_bacterium_4572_117	0	0	0	0	0	0	0	0	0	22	0	0	0	0	0	0	0	0	0	0
k__Bacteria	p__Bacteroidetes	c__Unclassified	o__Unclassified	f__Unclassified	g__Unclassified	s__Bacteroidetes_bacterium_47_18	0	5	0	0	0	4	0	0	0	0	0	0	0	0	0	0	0	0	0	0
k__Bacteria	p__Bacteroidetes	c__Unclassified	o__Unclassified	f__Unclassified	g__Unclassified	s__Bacteroidetes_bacterium_CG23_combo_of_CG06_09_8_20_14_all_32_9	0	0	0	8	0	0	0	0	0	0	0	0	0	0	0	0	0	0	0	0
k__Bacteria	p__Bacteroidetes	c__Unclassified	o__Unclassified	f__Unclassified	g__Unclassified	s__Bacteroidetes_bacterium_CG2_30_33_31	0	0	0	0	0	0	0	0	0	0	0	0	0	0	0	0	0	0	0	0
k__Bacteria	p__Bacteroidetes	c__Unclassified	o__Unclassified	f__Unclassified	g__Unclassified	s__Bacteroidetes_bacterium_GWA2_30_7	0	0	0	13	0	0	0	0	0	0	0	0	0	0	0	0	0	0	0	0
k__Bacteria	p__Bacteroidetes	c__Unclassified	o__Unclassified	f__Unclassified	g__Unclassified	s__Bacteroidetes_bacterium_GWA2_32_17	0	0	0	14	0	0	0	0	0	0	0	0	0	0	0	0	0	0	0	0
k__Bacteria	p__Bacteroidetes	c__Unclassified	o__Unclassified	f__Unclassified	g__Unclassified	s__Bacteroidetes_bacterium_GWA2_33_15	0	0	0	38	0	0	0	0	0	0	0	0	0	0	0	0	0	0	0	0
k__Bacteria	p__Bacteroidetes	c__Unclassified	o__Unclassified	f__Unclassified	g__Unclassified	s__Bacteroidetes_bacterium_GWA2_40_14	0	0	0	3	0	0	0	0	0	0	0	0	0	0	0	0	0	0	0	0
k__Bacteria	p__Bacteroidetes	c__Unclassified	o__Unclassified	f__Unclassified	g__Unclassified	s__Bacteroidetes_bacterium_GWA2_42_15	0	0	0	0	0	0	0	0	0	0	0	0	0	0	0	0	0	0	0	0
k__Bacteria	p__Bacteroidetes	c__Unclassified	o__Unclassified	f__Unclassified	g__Unclassified	s__Bacteroidetes_bacterium_GWB2_41_8	0	0	0	110	0	3	3	0	0	10	0	0	0	0	0	0	0	0	0	0
k__Bacteria	p__Bacteroidetes	c__Unclassified	o__Unclassified	f__Unclassified	g__Unclassified	s__Bacteroidetes_bacterium_GWC2_40_13	0	50	0	12	0	0	0	0	0	0	0	0	0	0	0	0	0	0	0	0
k__Bacteria	p__Bacteroidetes	c__Unclassified	o__Unclassified	f__Unclassified	g__Unclassified	s__Bacteroidetes_bacterium_GWC2_46_850	0	0	0	29	0	0	0	4	0	0	0	0	0	0	0	0	0	0	0	0
k__Bacteria	p__Bacteroidetes	c__Unclassified	o__Unclassified	f__Unclassified	g__Unclassified	s__Bacteroidetes_bacterium_GWE2_32_14	0	0	0	36	0	0	0	0	0	0	0	0	0	0	0	0	0	0	0	0
k__Bacteria	p__Bacteroidetes	c__Unclassified	o__Unclassified	f__Unclassified	g__Unclassified	s__Bacteroidetes_bacterium_GWE2_39_28	0	0	0	11	0	0	0	0	0	0	0	0	0	0	0	0	0	0	0	0
k__Bacteria	p__Bacteroidetes	c__Unclassified	o__Unclassified	f__Unclassified	g__Unclassified	s__Bacteroidetes_bacterium_GWE2_42_24	0	0	0	23	0	0	0	0	0	0	0	0	0	0	0	0	0	0	0	0
k__Bacteria	p__Bacteroidetes	c__Unclassified	o__Unclassified	f__Unclassified	g__Unclassified	s__Bacteroidetes_bacterium_GWE2_42_39	0	0	0	19	0	0	0	0	0	0	0	0	0	0	0	0	0	0	0	0
k__Bacteria	p__Bacteroidetes	c__Unclassified	o__Unclassified	f__Unclassified	g__Unclassified	s__Bacteroidetes_bacterium_GWE2_42_42	0	0	0	13	0	0	0	0	0	0	0	0	0	0	0	0	0	0	0	0
k__Bacteria	p__Bacteroidetes	c__Unclassified	o__Unclassified	f__Unclassified	g__Unclassified	s__Bacteroidetes_bacterium_GWF2_33_38	0	0	0	0	0	8	0	0	0	0	0	0	0	0	0	0	0	0	10	0
k__Bacteria	p__Bacteroidetes	c__Unclassified	o__Unclassified	f__Unclassified	g__Unclassified	s__Bacteroidetes_bacterium_GWF2_35_48	0	3	0	24	0	0	0	0	0	0	0	0	0	0	0	0	0	0	0	0
k__Bacteria	p__Bacteroidetes	c__Unclassified	o__Unclassified	f__Unclassified	g__Unclassified	s__Bacteroidetes_bacterium_GWF2_40_14	0	0	0	18	0	0	0	0	0	3	0	0	0	0	0	0	0	0	0	0
k__Bacteria	p__Bacteroidetes	c__Unclassified	o__Unclassified	f__Unclassified	g__Unclassified	s__Bacteroidetes_bacterium_HGW_Bacteroidetes_1	0	0	0	12	0	0	0	0	0	0	0	0	0	0	0	0	0	0	0	0
k__Bacteria	p__Bacteroidetes	c__Unclassified	o__Unclassified	f__Unclassified	g__Unclassified	s__Bacteroidetes_bacterium_HGW_Bacteroidetes_11	0	0	0	62	0	0	0	0	0	4	0	0	0	0	0	0	0	0	0	0
k__Bacteria	p__Bacteroidetes	c__Unclassified	o__Unclassified	f__Unclassified	g__Unclassified	s__Bacteroidetes_bacterium_HGW_Bacteroidetes_12	4	0	0	0	0	0	0	0	0	0	0	0	0	0	0	0	0	0	0	0
k__Bacteria	p__Bacteroidetes	c__Unclassified	o__Unclassified	f__Unclassified	g__Unclassified	s__Bacteroidetes_bacterium_HGW_Bacteroidetes_15	0	0	0	51	0	0	0	0	0	0	0	0	0	0	0	0	0	0	0	0
k__Bacteria	p__Bacteroidetes	c__Unclassified	o__Unclassified	f__Unclassified	g__Unclassified	s__Bacteroidetes_bacterium_HGW_Bacteroidetes_16	0	0	0	5	0	0	0	0	0	0	0	0	0	0	0	0	0	0	0	0
k__Bacteria	p__Bacteroidetes	c__Unclassified	o__Unclassified	f__Unclassified	g__Unclassified	s__Bacteroidetes_bacterium_HGW_Bacteroidetes_18	0	0	0	6	0	0	0	0	0	0	0	0	0	0	0	0	0	0	0	0
k__Bacteria	p__Bacteroidetes	c__Unclassified	o__Unclassified	f__Unclassified	g__Unclassified	s__Bacteroidetes_bacterium_HGW_Bacteroidetes_4	0	0	0	39	0	0	0	0	0	0	0	0	0	0	0	0	0	0	0	0
k__Bacteria	p__Bacteroidetes	c__Unclassified	o__Unclassified	f__Unclassified	g__Unclassified	s__Bacteroidetes_bacterium_HGW_Bacteroidetes_6	0	0	0	7	0	0	0	0	0	0	0	0	0	0	0	0	0	0	0	0
k__Bacteria	p__Bacteroidetes	c__Unclassified	o__Unclassified	f__Unclassified	g__Unclassified	s__Bacteroidetes_bacterium_HGW_Bacteroidetes_8	0	0	0	0	0	0	0	0	0	0	0	0	0	0	0	0	0	0	0	0
k__Bacteria	p__Bacteroidetes	c__Unclassified	o__Unclassified	f__Unclassified	g__Unclassified	s__Bacteroidetes_bacterium_HGW_Bacteroidetes_9	0	0	0	18	2	0	0	0	5	0	0	0	0	0	0	5	2	0	0	0
k__Bacteria	p__Bacteroidetes	c__Unclassified	o__Unclassified	f__Unclassified	g__Unclassified	s__Bacteroidetes_bacterium_HLUCCA01	0	0	0	0	0	0	0	0	0	0	0	0	3	0	0	0	0	0	0	0
k__Bacteria	p__Bacteroidetes	c__Unclassified	o__Unclassified	f__Unclassified	g__Unclassified	s__Bacteroidetes_bacterium_OLB8	0	0	0	10	0	0	0	0	0	0	0	0	0	0	0	0	0	0	0	0
k__Bacteria	p__Bacteroidetes	c__Unclassified	o__Unclassified	f__Unclassified	g__Unclassified	s__Bacteroidetes_bacterium_QH_8_67_23	0	0	0	3	0	0	0	0	0	0	0	0	0	0	0	0	0	0	0	0
k__Bacteria	p__Bacteroidetes	c__Unclassified	o__Unclassified	f__Unclassified	g__Unclassified	s__Bacteroidetes_bacterium_RBG_13_42_15	0	0	0	5	0	0	0	0	0	0	0	0	0	0	0	0	0	0	0	0
k__Bacteria	p__Bacteroidetes	c__Unclassified	o__Unclassified	f__Unclassified	g__Unclassified	s__Bacteroidetes_bacterium_RBG_13_43_22	0	0	0	0	0	0	0	0	0	0	0	0	0	0	0	0	0	0	0	0
k__Bacteria	p__Bacteroidetes	c__Unclassified	o__Unclassified	f__Unclassified	g__Unclassified	s__Bacteroidetes_bacterium_RBG_13_44_24	0	0	0	35	0	0	0	0	0	0	0	0	0	0	0	0	0	0	0	0
k__Bacteria	p__Bacteroidetes	c__Unclassified	o__Unclassified	f__Unclassified	g__Unclassified	s__Bacteroidetes_bacterium_RIFCSPLOWO2_12_FULL_31_6	0	0	0	20	0	0	0	0	0	0	0	0	0	0	0	0	0	0	0	0
k__Bacteria	p__Bacteroidetes	c__Unclassified	o__Unclassified	f__Unclassified	g__Unclassified	s__Bacteroidetes_bacterium_RIFCSPLOWO2_12_FULL_35_15	0	0	0	0	0	0	3	0	0	0	0	0	0	0	0	0	0	0	0	0
k__Bacteria	p__Bacteroidetes	c__Unclassified	o__Unclassified	f__Unclassified	g__Unclassified	s__Bacteroidetes_bacterium_oral_taxon_272	0	7	0	62	0	0	0	0	0	0	0	0	0	0	0	0	0	0	0	0
k__Bacteria	p__Bacteroidetes	c__Unclassified	o__Unclassified	f__Unclassified	g__Unclassified	s__Bacteroidetes_oral_taxon_274	55	189	48	658	0	0	38	101	1169	87	0	0	0	0	0	0	0	0	0	0
k__Bacteria	p__Bacteroidetes	c__Unclassified	o__Unclassified	f__Unclassified	g__Unclassified	s__Candidatus_[Bacteroides]_periocalifornicus	12	1371	0	11965	0	0	0	0	0	82	0	0	0	0	0	0	0	0	0	0
k__Bacteria	p__Bacteroidetes	c__Unclassified	o__Unclassified	f__Unclassified	g__Unclassified	s__Unclassified	303	903	61	1885	0	0	227	2	276	622	0	0	0	0	0	5	0	0	3	0
k__Bacteria	p__Balneolaeota	c__Balneolia	o__Balneolales	f__Balneolaceae	g__Aliifodinibius	s__Aliifodinibius_sp._WN023	0	0	0	0	0	0	0	0	0	3	0	0	0	0	0	0	0	0	0	0
k__Bacteria	p__Balneolaeota	c__Balneolia	o__Balneolales	f__Balneolaceae	g__Balneola	s__Balneola_sp._EhC07	4	0	0	0	0	0	0	0	0	0	0	0	0	0	0	0	0	0	0	0
k__Bacteria	p__Balneolaeota	c__Balneolia	o__Balneolales	f__Balneolaceae	g__Gracilimonas	s__Gracilimonas_tropica	0	18	0	0	0	0	0	0	0	0	0	0	0	0	0	0	0	0	0	0
k__Bacteria	p__Balneolaeota	c__Balneolia	o__Balneolales	f__Balneolaceae	g__Rhodohalobacter	s__Rhodohalobacter_barkolensis	0	0	0	9	0	0	0	0	0	0	0	0	0	0	0	0	0	0	0	0
k__Bacteria	p__Caldiserica	c__Caldisericia	o__Caldisericales	f__Caldisericaceae	g__Caldisericum	s__Caldisericum_exile	0	0	0	5	0	0	0	0	0	0	0	0	0	0	0	0	0	0	0	0
k__Bacteria	p__Calditrichaeota	c__Unclassified	o__Unclassified	f__Unclassified	g__Unclassified	s__Calditrichaeota_bacterium	0	15	0	22	0	0	0	0	0	0	0	0	0	0	0	0	0	0	0	0
k__Bacteria	p__Candidatus_Absconditabacteria	c__Unclassified	o__Unclassified	f__Unclassified	g__Unclassified	s__SR1_bacterium_human_oral_taxon_HOT_345	0	90	252	2805	0	0	29	8	30	675	0	0	0	0	0	0	0	0	0	0
k__Bacteria	p__Candidatus_Absconditabacteria	c__Unclassified	o__Unclassified	f__Unclassified	g__Unclassified	s__Unclassified	0	0	61	342	0	0	3	11	13	85	0	0	0	0	0	0	0	0	0	0
k__Bacteria	p__Candidatus_Absconditabacteria	c__Unclassified	o__Unclassified	f__Unclassified	g__Unclassified	s__candidate_division_SR1_bacterium	0	34	198	3501	0	0	228	5	0	1321	0	0	0	0	0	0	0	0	0	0
k__Bacteria	p__Candidatus_Absconditabacteria	c__Unclassified	o__Unclassified	f__Unclassified	g__Unclassified	s__candidate_division_SR1_bacterium_Aalborg_AAW_1	0	0	0	26	0	0	3	0	13	14	0	0	0	0	0	0	0	0	0	0
k__Bacteria	p__Candidatus_Absconditabacteria	c__Unclassified	o__Unclassified	f__Unclassified	g__Unclassified	s__candidate_division_SR1_bacterium_CG_4_9_14_3_um_filter_40_9	0	0	0	73	0	0	0	0	0	61	0	0	0	0	0	0	0	0	0	0
k__Bacteria	p__Candidatus_Absconditabacteria	c__Unclassified	o__Unclassified	f__Unclassified	g__Unclassified	s__candidate_division_SR1_bacterium_RAAC1_SR1_1	0	0	0	42	0	0	0	0	0	31	0	0	0	0	0	0	0	0	0	0
k__Bacteria	p__Candidatus_Abyssubacteria	c__Unclassified	o__Unclassified	f__Unclassified	g__Unclassified	s__Candidatus_Abyssubacteria_bacterium_SURF_17	0	0	0	19	0	0	0	0	0	0	0	0	0	0	0	0	0	0	0	0
k__Bacteria	p__Candidatus_Abyssubacteria	c__Unclassified	o__Unclassified	f__Unclassified	g__Unclassified	s__Candidatus_Abyssubacteria_bacterium_SURF_5	0	3	0	14	0	0	0	0	0	0	0	0	0	0	0	0	0	0	0	0
k__Bacteria	p__Candidatus_Aerophobetes	c__Unclassified	o__Unclassified	f__Unclassified	g__Unclassified	s__Candidatus_Aerophobetes_bacterium	0	65	0	0	0	0	17	6	0	0	0	0	0	0	0	0	0	0	0	0
k__Bacteria	p__Candidatus_Aminicenantes	c__Unclassified	o__Unclassified	f__Unclassified	g__Unclassified	s__Candidatus_Aminicenantes_bacterium	0	0	0	0	0	0	0	0	4	0	0	0	0	0	0	0	0	0	0	0
k__Bacteria	p__Candidatus_Aminicenantes	c__Unclassified	o__Unclassified	f__Unclassified	g__Unclassified	s__Candidatus_Aminicenantes_bacterium_RBG_13_62_12	0	0	0	0	0	0	0	5	0	0	0	0	0	0	0	0	0	0	0	0
k__Bacteria	p__Candidatus_Aminicenantes	c__Unclassified	o__Unclassified	f__Unclassified	g__Unclassified	s__Candidatus_Aminicenantes_bacterium_RBG_16_63_16	0	0	0	0	0	0	0	0	0	0	0	0	0	0	0	0	0	0	0	19
k__Bacteria	p__Candidatus_Aminicenantes	c__Unclassified	o__Unclassified	f__Unclassified	g__Unclassified	s__Candidatus_Aminicenantes_bacterium_RBG_19FT_COMBO_65_30	0	0	0	4	0	0	0	0	0	0	0	0	0	0	0	0	0	0	0	0
k__Bacteria	p__Candidatus_Andersenbacteria	c__Unclassified	o__Unclassified	f__Unclassified	g__Unclassified	s__Candidatus_Andersenbacteria_bacterium_CG10_big_fil_rev_8_21_14_0_10_54_11	0	0	0	0	0	0	0	0	0	9	0	0	0	0	0	0	0	0	0	0
k__Bacteria	p__Candidatus_Azambacteria	c__Unclassified	o__Unclassified	f__Unclassified	g__Unclassified	s__Candidatus_Azambacteria_bacterium_GW2011_GWA1_44_9	0	4	0	0	0	0	0	0	0	0	0	0	0	0	0	0	0	0	0	0
k__Bacteria	p__Candidatus_Bipolaricaulota	c__Unclassified	o__Unclassified	f__Unclassified	g__Unclassified	s__Acetothermia_bacterium_64_32	0	0	0	15	0	0	4	0	0	0	0	0	0	0	0	0	0	0	0	0
k__Bacteria	p__Candidatus_Buchananbacteria	c__Unclassified	o__Unclassified	f__Unclassified	g__Unclassified	s__Candidatus_Buchananbacteria_bacterium_RIFCSPHIGHO2_01_FULL_39_14	0	0	0	0	0	0	0	0	0	8	0	0	0	0	0	0	0	0	0	0
k__Bacteria	p__Candidatus_Cloacimonetes	c__Unclassified	o__Unclassified	f__Unclassified	g__Unclassified	s__Candidatus_Cloacimonetes_bacterium	0	16	0	114	0	0	0	0	0	0	0	0	0	0	0	0	0	0	0	0
k__Bacteria	p__Candidatus_Cloacimonetes	c__Unclassified	o__Unclassified	f__Unclassified	g__Unclassified	s__Candidatus_Cloacimonetes_bacterium_4572_65	0	0	0	0	0	0	3	0	0	0	0	0	0	0	0	0	0	0	0	0
k__Bacteria	p__Candidatus_Collierbacteria	c__Unclassified	o__Unclassified	f__Unclassified	g__Unclassified	s__Candidatus_Collierbacteria_bacterium_CG17_big_fil_post_rev_8_21_14_2_50_45_7	0	0	0	0	0	0	0	0	0	5	0	0	0	0	0	0	0	0	0	0
k__Bacteria	p__Candidatus_Collierbacteria	c__Unclassified	o__Unclassified	f__Unclassified	g__Unclassified	s__Candidatus_Collierbacteria_bacterium_GW2011_GWC2_44_13	0	0	0	5	0	0	0	0	0	0	0	0	0	0	0	0	0	0	0	0
k__Bacteria	p__Candidatus_Colwellbacteria	c__Unclassified	o__Unclassified	f__Unclassified	g__Unclassified	s__Candidatus_Colwellbacteria_bacterium_CG10_big_fil_rev_8_21_14_0_10_42_22	0	0	0	0	0	0	0	0	9	0	0	0	0	0	0	0	0	0	0	0
k__Bacteria	p__Candidatus_Dadabacteria	c__Unclassified	o__Unclassified	f__Unclassified	g__Unclassified	s__Candidatus_Dadabacteria_bacterium	0	0	0	17	0	0	6	0	0	0	0	0	0	0	0	0	0	0	0	0
k__Bacteria	p__Candidatus_Dadabacteria	c__Unclassified	o__Unclassified	f__Unclassified	g__Unclassified	s__Candidatus_Dadabacteria_bacterium_CSP1_2	0	0	0	0	0	0	0	0	0	13	0	0	0	0	0	0	0	0	0	0
k__Bacteria	p__Candidatus_Delongbacteria	c__Unclassified	o__Unclassified	f__Unclassified	g__Unclassified	s__Candidatus_Delongbacteria_bacterium	0	0	0	4	0	0	0	0	0	0	0	0	0	0	0	0	0	0	0	0
k__Bacteria	p__Candidatus_Edwardsbacteria	c__Unclassified	o__Unclassified	f__Unclassified	g__Unclassified	s__Candidatus_Edwardsbacteria_bacterium_RifOxyC12_full_54_24	0	14	0	0	0	0	3	0	0	0	0	0	0	0	0	0	0	0	0	0
k__Bacteria	p__Candidatus_Eremiobacteraeota	c__Unclassified	o__Unclassified	f__Unclassified	g__Unclassified	s__Candidatus_Eremiobacteraeota_bacterium	40	0	0	0	0	0	0	0	0	0	0	0	0	0	0	0	0	0	0	0
k__Bacteria	p__Candidatus_Falkowbacteria	c__Unclassified	o__Unclassified	f__Unclassified	g__Unclassified	s__Candidatus_Falkowbacteria_bacterium_CG10_big_fil_rev_8_21_14_0_10_43_11	0	0	0	0	0	0	0	0	0	0	0	0	0	0	0	0	0	0	0	0
k__Bacteria	p__Candidatus_Falkowbacteria	c__Unclassified	o__Unclassified	f__Unclassified	g__Unclassified	s__Candidatus_Falkowbacteria_bacterium_HGW_Falkowbacteria_1	0	0	0	0	0	0	0	0	0	20	0	0	0	0	0	0	0	0	0	0
k__Bacteria	p__Candidatus_Falkowbacteria	c__Unclassified	o__Unclassified	f__Unclassified	g__Unclassified	s__Candidatus_Falkowbacteria_bacterium_HGW_Falkowbacteria_2	0	37	0	0	0	0	0	0	0	0	0	0	0	0	0	0	0	0	0	0
k__Bacteria	p__Candidatus_Fermentibacteria	c__Unclassified	o__Unclassified	f__Unclassified	g__Unclassified	s__Candidatus_Fermentibacteria_bacterium	0	0	0	0	0	0	0	0	0	0	0	0	0	0	0	11	0	0	0	0
k__Bacteria	p__Candidatus_Firestonebacteria	c__Unclassified	o__Unclassified	f__Unclassified	g__Unclassified	s__Candidatus_Firestonebacteria_bacterium_RIFOXYC2_FULL_39_67	0	4	0	0	0	0	0	0	0	0	0	0	0	0	0	0	0	0	0	0
k__Bacteria	p__Candidatus_Giovannonibacteria	c__Unclassified	o__Unclassified	f__Unclassified	g__Unclassified	s__Candidatus_Giovannonibacteria_bacterium_RIFCSPHIGHO2_01_FULL_45_23	0	0	0	0	0	0	0	0	0	33	0	0	0	0	0	0	0	0	0	0
k__Bacteria	p__Candidatus_Giovannonibacteria	c__Unclassified	o__Unclassified	f__Unclassified	g__Unclassified	s__Candidatus_Giovannonibacteria_bacterium_RIFCSPHIGHO2_12_FULL_44_29	0	0	0	0	0	0	0	0	0	5	0	0	0	0	0	0	8	0	0	0
k__Bacteria	p__Candidatus_Goldbacteria	c__Unclassified	o__Unclassified	f__Unclassified	g__Unclassified	s__Candidatus_Goldbacteria_bacterium_HGW_Goldbacteria_1	0	3	0	4	0	0	0	0	0	0	0	0	0	0	0	0	0	0	0	0
k__Bacteria	p__Candidatus_Gottesmanbacteria	c__Unclassified	o__Unclassified	f__Unclassified	g__Unclassified	s__Candidatus_Gottesmanbacteria_bacterium_RBG_16_52_11	0	0	0	3	0	0	0	0	0	0	0	0	0	0	0	0	0	0	0	0
k__Bacteria	p__Candidatus_Gottesmanbacteria	c__Unclassified	o__Unclassified	f__Unclassified	g__Unclassified	s__Candidatus_Gottesmanbacteria_bacterium_RIFCSPHIGHO2_12_FULL_40_13	0	0	0	0	0	0	0	0	0	0	0	0	0	0	5	0	0	0	0	0
k__Bacteria	p__Candidatus_Gottesmanbacteria	c__Unclassified	o__Unclassified	f__Unclassified	g__Unclassified	s__Candidatus_Gottesmanbacteria_bacterium_RIFCSPLOWO2_01_FULL_43_11b	0	0	0	0	0	0	6	0	0	0	0	0	0	0	0	0	0	0	0	0
k__Bacteria	p__Candidatus_Gracilibacteria	c__Unclassified	o__Unclassified	f__Unclassified	g__Unclassified	s__Candidatus_Gracilibacteria_bacterium	0	239	2211	11405	0	2	916	58	273	4320	0	0	0	0	0	0	0	0	0	0
k__Bacteria	p__Candidatus_Gracilibacteria	c__Unclassified	o__Unclassified	f__Unclassified	g__Unclassified	s__Candidatus_Gracilibacteria_bacterium_CG18_big_fil_WC_8_21_14_2_50_38_16	0	0	0	0	0	0	0	0	9	0	0	0	0	0	0	0	0	0	0	0
k__Bacteria	p__Candidatus_Gracilibacteria	c__Unclassified	o__Unclassified	f__Unclassified	g__Unclassified	s__Candidatus_Gracilibacteria_bacterium_CG1_02_38_174	0	0	0	0	0	0	0	0	4	0	0	0	0	0	0	0	0	0	0	0
k__Bacteria	p__Candidatus_Gracilibacteria	c__Unclassified	o__Unclassified	f__Unclassified	g__Unclassified	s__Candidatus_Gracilibacteria_bacterium_GN02_872	0	0	3	0	0	0	0	0	0	3	0	0	0	0	0	0	0	0	0	0
k__Bacteria	p__Candidatus_Gracilibacteria	c__Unclassified	o__Unclassified	f__Unclassified	g__Unclassified	s__Candidatus_Gracilibacteria_bacterium_GN02_873	0	17	17	4	0	0	0	0	1428	3	0	0	0	0	0	0	0	0	0	0
k__Bacteria	p__Candidatus_Gracilibacteria	c__Unclassified	o__Unclassified	f__Unclassified	g__Unclassified	s__Unclassified	0	0	0	43	0	0	0	0	3	0	0	0	0	0	0	0	0	0	0	0
k__Bacteria	p__Candidatus_Gribaldobacteria	c__Unclassified	o__Unclassified	f__Unclassified	g__Unclassified	s__bacterium__Candidatus_Gribaldobacteria__CG23_combo_of_CG06_09_8_20_14_all_37_87_8	0	0	0	0	0	0	0	0	0	11	0	0	0	0	0	0	0	0	0	0
k__Bacteria	p__Candidatus_Harrisonbacteria	c__Unclassified	o__Unclassified	f__Unclassified	g__Unclassified	s__Candidatus_Harrisonbacteria_bacterium_RIFCSPLOWO2_02_FULL_45_10c	0	0	0	0	0	0	0	0	0	6	0	0	0	0	0	0	0	0	0	0
k__Bacteria	p__Candidatus_Hydrogenedentes	c__Unclassified	o__Unclassified	f__Unclassified	g__Unclassified	s__Candidatus_Hydrogenedentes_bacterium	0	0	0	0	0	0	0	10	0	0	0	0	0	0	0	0	3	0	0	0
k__Bacteria	p__Candidatus_Jorgensenbacteria	c__Unclassified	o__Unclassified	f__Unclassified	g__Unclassified	s__Candidatus_Jorgensenbacteria_bacterium_CG23_combo_of_CG06_09_8_20_14_all_54_14	0	0	0	9	0	0	0	0	0	0	0	0	0	0	0	0	0	0	0	0
k__Bacteria	p__Candidatus_Kaiserbacteria	c__Unclassified	o__Unclassified	f__Unclassified	g__Unclassified	s__Candidatus_Kaiserbacteria_bacterium_CG10_big_fil_rev_8_21_14_0_10_59_10	0	4	0	0	0	0	0	0	0	4	0	0	0	0	0	0	0	0	0	0
k__Bacteria	p__Candidatus_Kaiserbacteria	c__Unclassified	o__Unclassified	f__Unclassified	g__Unclassified	s__Candidatus_Kaiserbacteria_bacterium_RIFCSPLOWO2_01_FULL_45_25	0	0	0	0	0	0	0	0	0	0	0	0	0	0	0	0	0	0	0	0
k__Bacteria	p__Candidatus_Kerfeldbacteria	c__Unclassified	o__Unclassified	f__Unclassified	g__Unclassified	s__Candidatus_Kerfeldbacteria_bacterium_CG08_land_8_20_14_0_20_40_16	0	0	0	0	0	0	0	0	0	13	0	0	0	0	0	0	0	0	0	0
k__Bacteria	p__Candidatus_Kerfeldbacteria	c__Unclassified	o__Unclassified	f__Unclassified	g__Unclassified	s__Candidatus_Kerfeldbacteria_bacterium_RIFCSPHIGHO2_12_FULL_48_17	12	0	0	0	0	0	0	0	0	0	0	0	0	0	0	0	0	0	0	0
k__Bacteria	p__Candidatus_Kryptonia	c__Unclassified	o__Unclassified	f__Unclassified	g__Candidatus_Chrysopegis	s__Candidatus_Chrysopegis_kryptomonas	0	0	0	0	0	0	0	0	0	0	0	0	0	0	0	0	0	0	0	0
k__Bacteria	p__Candidatus_Kryptonia	c__Unclassified	o__Unclassified	f__Unclassified	g__Candidatus_Kryptobacter	s__Candidatus_Kryptobacter_tengchongensis	0	9	0	0	0	0	0	0	0	0	0	0	0	0	0	0	0	0	0	0
k__Bacteria	p__Candidatus_Kryptonia	c__Unclassified	o__Unclassified	f__Unclassified	g__Candidatus_Kryptonium	s__Candidatus_Kryptonium_thompsoni	0	3	0	0	0	0	0	0	0	49	0	0	0	0	0	0	0	0	0	0
k__Bacteria	p__Candidatus_Kuenenbacteria	c__Unclassified	o__Unclassified	f__Unclassified	g__Unclassified	s__Candidatus_Kuenenbacteria_bacterium_HGW_Kuenenbacteria_1	0	0	0	0	0	0	0	0	0	11	0	0	0	0	0	0	0	0	0	0
k__Bacteria	p__Candidatus_Latescibacteria	c__Unclassified	o__Unclassified	f__Unclassified	g__Unclassified	s__Candidatus_Latescibacteria_bacterium	0	3	0	17	0	0	0	0	0	20	0	0	0	0	0	0	0	0	0	0
k__Bacteria	p__Candidatus_Latescibacteria	c__Unclassified	o__Unclassified	f__Unclassified	g__Unclassified	s__Candidatus_Latescibacteria_bacterium_4484_107	0	0	0	0	0	0	0	0	0	10	0	0	0	0	0	0	0	0	0	0
k__Bacteria	p__Candidatus_Levybacteria	c__Unclassified	o__Unclassified	f__Unclassified	g__Unclassified	s__Candidatus_Levybacteria_bacterium_RIFCSPHIGHO2_01_FULL_41_15	5	0	0	0	0	0	0	0	0	0	0	0	0	0	0	0	0	0	0	0
k__Bacteria	p__Candidatus_Liptonbacteria	c__Unclassified	o__Unclassified	f__Unclassified	g__Unclassified	s__Candidatus_Liptonbacteria_bacterium_RIFCSPLOWO2_01_FULL_52_25	0	0	0	0	0	0	0	7	0	0	0	0	0	0	0	0	0	0	0	0
k__Bacteria	p__Candidatus_Magasanikbacteria	c__Unclassified	o__Unclassified	f__Unclassified	g__Unclassified	s__Candidatus_Magasanikbacteria_bacterium_RIFCSPHIGHO2_01_FULL_33_34	0	30	0	0	0	0	0	0	0	0	0	0	0	0	0	0	0	0	0	0
k__Bacteria	p__Candidatus_Magasanikbacteria	c__Unclassified	o__Unclassified	f__Unclassified	g__Unclassified	s__Candidatus_Magasanikbacteria_bacterium_RIFOXYC12_FULL_33_11	0	0	0	3	0	0	0	0	0	0	0	0	0	0	0	0	0	0	0	0
k__Bacteria	p__Candidatus_Margulisbacteria	c__Candidatus_Riflemargulisbacteria	o__Unclassified	f__Unclassified	g__Unclassified	s__Candidatus_Margulisbacteria_bacterium_GWF2_35_9	0	0	0	0	0	0	4	0	0	7	0	0	0	0	0	0	0	0	0	0
k__Bacteria	p__Candidatus_Marinimicrobia	c__Unclassified	o__Unclassified	f__Unclassified	g__Unclassified	s__Candidatus_Marinimicrobia_bacterium	0	68	0	7	42	3	0	3	0	0	0	0	0	0	0	0	9	0	8	0
k__Bacteria	p__Candidatus_Marinimicrobia	c__Unclassified	o__Unclassified	f__Unclassified	g__Unclassified	s__Marinimicrobia_bacterium_46_47	0	0	0	4	0	0	0	0	0	0	0	0	0	0	0	0	0	0	0	0
k__Bacteria	p__Candidatus_Melainabacteria	c__Unclassified	o__Candidatus_Gastranaerophilales	f__Unclassified	g__Unclassified	s__Candidatus_Gastranaerophilales_bacterium	0	13	0	0	0	0	0	0	0	0	0	0	0	0	0	0	0	0	0	0
k__Bacteria	p__Candidatus_Melainabacteria	c__Unclassified	o__Candidatus_Gastranaerophilales	f__Unclassified	g__Unclassified	s__Candidatus_Gastranaerophilales_bacterium_HUM_1	0	9	0	0	0	0	0	0	0	0	0	0	0	0	0	0	0	0	0	0
k__Bacteria	p__Candidatus_Melainabacteria	c__Unclassified	o__Candidatus_Gastranaerophilales	f__Unclassified	g__Unclassified	s__Candidatus_Gastranaerophilales_bacterium_HUM_11	0	14	0	0	0	0	0	0	0	0	0	0	0	0	0	0	0	0	0	0
k__Bacteria	p__Candidatus_Melainabacteria	c__Unclassified	o__Candidatus_Gastranaerophilales	f__Unclassified	g__Unclassified	s__Candidatus_Gastranaerophilales_bacterium_HUM_14	0	9	0	0	0	0	0	0	0	0	0	0	0	0	0	0	0	0	0	0
k__Bacteria	p__Candidatus_Melainabacteria	c__Unclassified	o__Unclassified	f__Unclassified	g__Unclassified	s__Candidatus_Melainabacteria_bacterium	0	78	0	0	0	0	0	0	0	3	0	0	0	0	0	0	0	0	0	0
k__Bacteria	p__Candidatus_Melainabacteria	c__Unclassified	o__Unclassified	f__Unclassified	g__Unclassified	s__Candidatus_Melainabacteria_bacterium_35_41	0	3	0	0	0	0	0	0	0	0	0	0	0	0	0	0	0	0	0	0
k__Bacteria	p__Candidatus_Melainabacteria	c__Unclassified	o__Unclassified	f__Unclassified	g__Unclassified	s__Candidatus_Melainabacteria_bacterium_LEY3_CP_29_8	0	0	0	8	0	0	0	0	0	0	0	0	0	0	0	0	0	0	0	0
k__Bacteria	p__Candidatus_Microgenomates	c__Unclassified	o__Unclassified	f__Unclassified	g__Unclassified	s__Candidatus_Microgenomates_bacterium	0	8	0	0	0	0	0	0	0	0	0	0	0	0	0	0	0	0	0	0
k__Bacteria	p__Candidatus_Moranbacteria	c__Unclassified	o__Unclassified	f__Unclassified	g__Unclassified	s__Candidatus_Moranbacteria_bacterium	0	0	0	0	0	0	0	0	0	0	0	0	0	0	0	0	0	0	0	0
k__Bacteria	p__Candidatus_Moranbacteria	c__Unclassified	o__Unclassified	f__Unclassified	g__Unclassified	s__Candidatus_Moranbacteria_bacterium_GW2011_GWE1_35_17	0	21	0	0	0	0	0	0	0	0	0	0	0	0	0	0	0	0	0	0
k__Bacteria	p__Candidatus_Moranbacteria	c__Unclassified	o__Unclassified	f__Unclassified	g__Unclassified	s__Candidatus_Moranbacteria_bacterium_GW2011_GWF1_36_4	0	8	0	25	0	0	0	0	7	17	0	0	0	0	0	0	0	0	0	0
k__Bacteria	p__Candidatus_Moranbacteria	c__Unclassified	o__Unclassified	f__Unclassified	g__Unclassified	s__Candidatus_Moranbacteria_bacterium_RIFCSPHIGHO2_01_FULL_55_24	0	0	0	0	0	0	0	0	0	0	0	0	0	0	0	4	0	0	0	0
k__Bacteria	p__Candidatus_Moranbacteria	c__Unclassified	o__Unclassified	f__Unclassified	g__Unclassified	s__Candidatus_Moranbacteria_bacterium_RIFCSPHIGHO2_02_FULL_40_12b	0	0	0	0	0	0	0	0	0	4	0	0	0	0	0	0	0	0	0	0
k__Bacteria	p__Candidatus_Nealsonbacteria	c__Unclassified	o__Unclassified	f__Unclassified	g__Unclassified	s__Candidatus_Nealsonbacteria_bacterium_CG23_combo_of_CG06_09_8_20_14_all_40_13	5	0	0	0	0	0	0	0	0	0	0	0	0	0	0	0	0	0	0	0
k__Bacteria	p__Candidatus_Nomurabacteria	c__Unclassified	o__Unclassified	f__Unclassified	g__Unclassified	s__Candidatus_Nomurabacteria_bacterium_CG2_30_43_9	0	0	0	0	0	0	0	0	0	7	0	0	0	0	0	0	0	0	0	0
k__Bacteria	p__Candidatus_Nomurabacteria	c__Unclassified	o__Unclassified	f__Unclassified	g__Unclassified	s__Candidatus_Nomurabacteria_bacterium_GW2011_GWA2_40_9	0	0	0	5	0	0	0	0	0	0	0	0	0	0	0	0	0	0	0	0
k__Bacteria	p__Candidatus_Nomurabacteria	c__Unclassified	o__Unclassified	f__Unclassified	g__Unclassified	s__Candidatus_Nomurabacteria_bacterium_GW2011_GWE2_36_115	0	0	3	0	0	0	0	0	0	0	0	0	0	0	0	0	0	0	0	0
k__Bacteria	p__Candidatus_Nomurabacteria	c__Unclassified	o__Unclassified	f__Unclassified	g__Unclassified	s__Candidatus_Nomurabacteria_bacterium_RIFCSPHIGHO2_01_FULL_40_12	0	0	0	0	0	0	0	0	0	0	0	0	0	0	0	0	0	0	0	0
k__Bacteria	p__Candidatus_Nomurabacteria	c__Unclassified	o__Unclassified	f__Unclassified	g__Unclassified	s__Candidatus_Nomurabacteria_bacterium_RIFCSPHIGHO2_02_FULL_41_52	3	0	0	0	0	0	0	0	0	0	0	0	0	0	0	0	0	0	0	0
k__Bacteria	p__Candidatus_Nomurabacteria	c__Unclassified	o__Unclassified	f__Unclassified	g__Unclassified	s__Candidatus_Nomurabacteria_bacterium_RIFCSPLOWO2_01_FULL_33_24	0	0	0	13	0	0	0	0	0	0	0	0	0	0	0	0	0	0	0	0
k__Bacteria	p__Candidatus_Nomurabacteria	c__Unclassified	o__Unclassified	f__Unclassified	g__Unclassified	s__Candidatus_Nomurabacteria_bacterium_RIFCSPLOWO2_01_FULL_39_17	0	0	0	0	0	0	0	0	0	3	0	0	0	0	0	0	0	0	0	0
k__Bacteria	p__Candidatus_Omnitrophica	c__Unclassified	o__Unclassified	f__Unclassified	g__Candidatus_Omnitrophus	s__Candidatus_Omnitrophus_magneticus	0	3	0	0	0	0	0	0	0	0	0	0	0	0	0	0	0	0	0	0
k__Bacteria	p__Candidatus_Omnitrophica	c__Unclassified	o__Unclassified	f__Unclassified	g__Unclassified	s__Candidatus_Omnitrophica_bacterium	0	0	0	29	0	0	0	0	0	0	0	0	0	0	0	0	0	0	0	0
k__Bacteria	p__Candidatus_Omnitrophica	c__Unclassified	o__Unclassified	f__Unclassified	g__Unclassified	s__Candidatus_Omnitrophica_bacterium_4484_70.2	0	0	0	0	0	3	0	0	0	0	0	0	0	0	0	0	5	0	0	0
k__Bacteria	p__Candidatus_Omnitrophica	c__Unclassified	o__Unclassified	f__Unclassified	g__Unclassified	s__Candidatus_Omnitrophica_bacterium_CG1_02_40_15	0	4	0	3	0	0	0	0	0	0	0	0	0	0	0	0	0	0	0	0
k__Bacteria	p__Candidatus_Omnitrophica	c__Unclassified	o__Unclassified	f__Unclassified	g__Unclassified	s__Omnitrophica_WOR_2_bacterium_RIFCSPHIGHO2_02_FULL_68_15	0	7	0	0	0	0	0	0	0	0	0	0	0	0	0	0	0	0	0	0
k__Bacteria	p__Candidatus_Omnitrophica	c__Unclassified	o__Unclassified	f__Unclassified	g__Unclassified	s__Omnitrophica_bacterium_RIFCSPHIGHO2_02_FULL_63_14	0	3	0	0	0	0	0	0	0	0	0	0	0	0	0	0	0	0	0	0
k__Bacteria	p__Candidatus_Pacebacteria	c__Unclassified	o__Unclassified	f__Unclassified	g__Unclassified	s__Candidatus_Pacebacteria_bacterium_GW2011_GWA1_46_10	0	7	0	0	0	0	0	0	0	0	0	0	0	0	0	0	0	0	0	0
k__Bacteria	p__Candidatus_Parcubacteria	c__Unclassified	o__Unclassified	f__Unclassified	g__Unclassified	s__Candidatus_Parcubacteria_bacterium	0	0	0	33	0	0	0	0	0	15	0	19	0	0	0	0	0	0	0	0
k__Bacteria	p__Candidatus_Parcubacteria	c__Unclassified	o__Unclassified	f__Unclassified	g__Unclassified	s__Parcubacteria_bacterium_DG_74_2	0	0	0	3	0	0	0	0	0	0	0	0	0	0	0	0	0	0	0	0
k__Bacteria	p__Candidatus_Parcubacteria	c__Unclassified	o__Unclassified	f__Unclassified	g__Unclassified	s__Parcubacteria_bacterium_RAAC4_OD1_1	0	12	0	0	0	0	0	0	0	0	0	0	0	0	0	0	0	0	0	0
k__Bacteria	p__Candidatus_Peregrinibacteria	c__Unclassified	o__Unclassified	f__Unclassified	g__Unclassified	s__Candidatus_Peregrinibacteria_bacterium_CG08_land_8_20_14_0_20_41_10	0	0	0	0	0	0	0	0	0	0	0	0	0	0	48	0	0	0	0	0
k__Bacteria	p__Candidatus_Peregrinibacteria	c__Unclassified	o__Unclassified	f__Unclassified	g__Unclassified	s__Candidatus_Peregrinibacteria_bacterium_CG1_02_54_53	0	54	0	0	0	0	0	0	0	0	0	0	0	0	0	0	0	0	0	0
k__Bacteria	p__Candidatus_Peregrinibacteria	c__Unclassified	o__Unclassified	f__Unclassified	g__Unclassified	s__Candidatus_Peregrinibacteria_bacterium_CG_4_10_14_0_2_um_filter_43_11	0	0	0	0	0	0	0	0	0	4	0	0	0	0	0	0	0	0	0	0
k__Bacteria	p__Candidatus_Peregrinibacteria	c__Unclassified	o__Unclassified	f__Unclassified	g__Unclassified	s__Candidatus_Peregrinibacteria_bacterium_GW2011_GWA2_33_10	0	0	0	0	0	0	0	0	0	0	0	0	0	0	0	0	0	0	0	0
[truncated: 4,921 more rows]

## Sheet: Table S2
Table S2. Alpha diversity indices of microbial species in CRSwNP and control groups
sample	observed_species	ACE	Chao1	Shannon	Simpson	goods_Coverage	pielou_evenness
CRSwNP-1	1626	1626.37	1626.05	4.53146	0.973721	0.999998	0.612866
CRSwNP-2	2977	2977.35	2977.09	4.98908	0.984619	0.999999	0.623739
CRSwNP-3	765	767.1	766.565	4.37289	0.972901	0.999956	0.658579
CRSwNP-4	3057	3057	3057	5.12622	0.98795	1	0.638767
CRSwNP-5	186	186	186	3.37627	0.931726	1	0.646085
CRSwNP-6	492	493.803	492.966	3.87451	0.964585	0.99995	0.625075
CRSwNP-7	974	974.575	974.107	4.45028	0.972901	0.999992	0.64671
CRSwNP-8	489	489.196	489	2.87218	0.806294	0.999997	0.463826
CRSwNP-9	1170	1170.99	1170.45	4.67299	0.980355	0.999984	0.66145
CRSwNP-10	2359	2359.18	2359	5.02071	0.986149	0.999999	0.646499
HC-1	49	49	49	1.69095	0.653532	1	0.434489
HC-2	215	215	215	3.55876	0.949707	1	0.662633
HC-3	220	220.18	220	3.54697	0.952244	0.999989	0.657622
HC-4	206	206.202	206	3.58421	0.956477	0.999986	0.672727
HC-5	253	253.207	253	3.64786	0.956454	0.999993	0.659244
HC-6	260	260	260	3.5815	0.95214	1	0.644076
HC-7	475	475	475	3.64284	0.946955	1	0.591053
HC-8	234	234.188	234	3.63617	0.956516	0.99999	0.666536
HC-9	335	335	335	3.71784	0.953229	1	0.639449
HC-10	209	209	209	3.40347	0.934162	1	0.637076

## Sheet: Table S3
Table S3. PCoA coordinates of samples for microbial community analysis
sampleID	PC1	PC2	PC3	PC4	PC5	PC6	PC7	PC8	PC9	PC10	PC11	PC12	PC13	PC14	PC15	PC16	PC17	PC18	PC19	PC20
CRSwNP-1	0.260751	-0.075857	0.11312	0.130943	-0.0547886	0.0148466	-0.0255119	0.00528838	-0.00847189	0.00279206	-0.00420371	-0.00748552	0.000821135	-0.00150321	-0.00119215	0.000341132	-0.000703656	-0.000349148	-0.000409543	3.77e-09
CRSwNP-2	0.472183	-0.121814	0.111558	-0.124129	-0.0049836	0.0131891	0.00573812	0.00655577	0.00294559	-0.00487313	0.000993539	-0.00650993	-0.00153597	-0.000705805	-0.000292698	-0.000205372	0.000164679	0.000337748	0.000104047	3.77e-09
CRSwNP-3	-0.0908376	-0.0383216	0.00101513	0.0124021	-0.0218474	0.0134948	0.0118876	0.028433	0.0157699	-0.0211643	0.0176974	0.0156866	0.0131805	0.0168347	-0.00193006	-0.0026857	0.0003692	-0.00149645	-0.00069394	3.77e-09
CRSwNP-4	0.348806	-0.0452594	-0.23143	-0.00527304	-0.0476722	0.017317	-0.0118823	-0.014424	-0.00517459	-0.000235266	-0.00136396	0.00164967	0.00198626	-0.000328863	-0.00286336	-0.000623183	-4.58e-05	0.000133744	0.000162434	3.77e-09
CRSwNP-5	-0.116033	0.00683789	-0.021391	0.00981216	0.00135573	0.00322282	0.0206295	0.0153511	-0.0355458	-0.0185343	0.0188903	-0.00585078	-0.0209436	-0.00305343	-0.0030288	0.00393109	0.00443217	0.00104567	0.000788588	3.77e-09
CRSwNP-6	-0.107017	0.00663835	-0.0247205	0.00949583	0.0228137	-0.0100542	0.015802	-0.00492603	0.00663521	-0.00599152	-0.0144647	-0.0287382	-0.00314996	0.0175021	-0.00407072	-0.00569437	-0.00526832	0.00115141	0.0015354	3.77e-09
CRSwNP-7	-0.00992678	-0.0751542	-0.0310533	-0.0085788	-0.0117801	-0.10419	-0.0254588	0.0241693	0.00390434	0.00491269	-0.000369998	-0.000724247	-0.00167483	-0.00111365	0.00879101	1.37e-05	0.00155874	-0.00107912	0.000198069	3.77e-09
CRSwNP-8	-0.139082	-0.00949851	-0.0173375	-0.0137166	-0.0233655	0.020313	0.0453304	0.0357979	-0.0123983	0.0327755	-0.0150241	0.00480514	-0.000979603	-0.00290615	-0.00144369	-0.00241131	-0.00241725	-0.00186601	-0.00181902	3.77e-09
CRSwNP-9	-0.0843506	-0.0440403	-0.0278647	0.027346	-0.00248238	0.023347	0.0229211	0.0035908	0.0501713	-0.00285286	0.00334058	-0.00574986	-0.0075006	-0.0117577	0.00970684	0.00430964	0.000387275	0.00353993	-0.000158753	3.77e-09
CRSwNP-10	0.281363	-0.0963687	-0.0128905	0.0557392	0.123579	-0.00945332	0.0201893	-0.00838991	-0.00271612	0.00649906	0.00047096	0.0129116	-0.000450641	0.00125484	-0.00093156	-0.00010797	0.000217757	-0.000682026	-0.000203752	3.77e-09
HC-1	0.284237	0.41163	0.00958085	0.00191093	0.012611	-0.00333714	-0.00535007	0.0127958	0.00571726	-0.000735264	0.000387353	0.000134687	-0.000580305	-4.49e-05	0.0028016	0.000228941	-0.000176653	-0.000486575	-0.00055207	3.77e-09
HC-2	-0.165096	-0.00393388	0.00167618	-0.0117814	0.0240403	0.0316153	-0.0338347	-0.000646843	-0.00735359	0.00741487	0.0148651	-0.00201657	0.00194888	-0.00850152	0.00866879	-0.0156012	-0.00232593	-0.000752105	0.00249264	3.77e-09
HC-3	-0.171456	-0.00502988	0.00419073	-0.020661	0.0188832	0.0219563	-0.042487	-0.00664877	0.00638523	0.0138126	-0.00391979	-0.00188358	-0.00527243	0.00917249	-0.00319853	0.000716492	0.0139303	0.00138365	-0.0040176	3.77e-09
HC-4	-0.0583307	0.0341516	0.0542624	-0.00263197	-0.0417	-0.0159516	0.0123223	-0.0263826	0.00625621	-0.00208105	-0.0146788	0.0240813	-0.0123015	0.00283805	-0.00322392	-0.00544	0.00296749	0.00225641	0.00384428	3.77e-09
HC-5	-0.138751	-0.00222412	0.00852828	-0.00696173	-6.34e-05	-0.00185665	0.00854788	-0.0214372	-0.00441976	-0.0289034	-0.0160461	-0.000198672	0.0013022	-0.00915982	0.004275	-0.00227672	-0.000160988	-0.00726441	-0.00400405	3.77e-09
HC-6	-0.131496	-0.00192062	0.0105795	-0.0179208	0.00859916	-0.000625662	-0.0222541	-0.00296515	-0.0166895	-0.00747199	-0.00501848	0.00943894	0.00289633	1.86e-05	0.00264475	0.00346517	-0.0118769	0.00834703	-0.00327531	3.77e-09
HC-7	-0.120422	0.0207108	0.00211569	-0.00325617	0.0159004	-0.0104303	0.00398586	0.00876838	-0.0036062	-0.00806493	-0.00800146	-0.00552288	0.0217728	-0.0140717	-0.0134217	0.00145761	0.00691154	0.00323432	0.00256066	3.77e-09
HC-8	-0.0650498	0.0332636	0.0330188	-0.00438453	-0.0264972	-0.0337291	0.0225341	-0.0375048	0.00599013	0.0187292	0.0267602	-0.005143	0.00363781	-0.00228124	-0.0100042	-0.000264752	-0.003455	-0.000856326	-0.00238077	3.77e-09
HC-9	-0.08488	0.0129907	0.0162221	-0.00792468	-0.00933502	0.0126528	0.0166451	-0.0221167	-0.018789	0.008942	0.000817663	-0.00285617	0.0125592	0.00813962	0.0183039	0.00979907	0.00332902	-0.00082606	0.00272465	3.77e-09
HC-10	-0.164612	-0.00680113	0.000819722	-0.0204294	0.0167326	0.017673	-0.0397544	0.00469148	0.0113896	0.00503011	-0.00113192	0.00397147	-0.00571568	-0.000332392	-0.0095905	0.0110477	-0.00783762	-0.00577168	0.00310404	3.77e-09

## Sheet: Table S4
Table S4. Differential microbial abundance at phylum, genus, and family levels (Kruskal–Wallis test)
treat1.taxonomy.phylum.relabund
Taxon	p value	adjust p value	A1 mean	A1 Standard Error of Mean	A1 Standard Deviation	B1 mean	B1 Standard Error of Mean	B1 Standard Deviation
Artverviricota	0.000212183	0.027796	0.00344694	0.000243837	0.00077108	0.0016783	0.000178587	0.000564743
Candidatus_Saccharibacteria	0.000669729	0.0330112	0	0	0	0.00171544	0.000831014	0.0026279
Bacteroidetes	0.000880743	0.0330112	0.000749888	0.000292279	0.000924268	0.0980228	0.0280325	0.0886466
Spirochaetes	0.00100798	0.0330112	8.85916e-07	4.65745e-07	1.47281e-06	0.00692016	0.00583332	0.0184466
Candidatus_Gracilibacteria	0.00249691	0.065419	0	0	0	0.000824472	0.000360315	0.00113942
Arthropoda	0.0031971	0.0698033	0.00368661	0.00333669	0.0105515	0.00229647	0.000417752	0.00132105
Fusobacteria	0.0065017	0.118642	6.0076e-05	3.53959e-05	0.000111932	0.0146686	0.00746927	0.0236199
Candidatus_Absconditabacteria	0.00815097	0.118642	0	0	0	0.000346048	0.00020807	0.000657976
Actinobacteria	0.00815097	0.118642	0.00769206	0.00107442	0.0033976	0.0398246	0.011708	0.0370239
Chlamydiae	0.0191099	0.227582	0.0314697	0.0227	0.0717836	0.0242395	0.00397615	0.0125737
Chloroflexi	0.0191099	0.227582	8.83517e-06	3.23241e-06	1.02218e-05	3.04718e-05	1.02615e-05	3.24497e-05
Uroviricota	0.0211339	0.230712	1.72562e-06	9.21301e-07	2.91341e-06	0.000302014	9.84733e-05	0.0003114
Tenericutes	0.0233422	0.235218	0	0	0	5.84855e-05	1.9357e-05	6.12122e-05
Mucoromycota	0.0283655	0.26542	0.000557009	9.74824e-05	0.000308266	0.000304311	5.02979e-05	0.000159056
treat1.taxonomy.family.relabund
Taxon	p value	adjust p value	A1 mean	A1 Standard Error of Mean	A1 Standard Deviation	B1 mean	B1 Standard Error of Mean	B1 Standard Deviation
Veillonellaceae	0.000157052	0.0629122	8.19867e-07	6.14496e-07	1.94321e-06	0.0184516	0.00770343	0.0243604
Retroviridae	0.000212183	0.0629122	0.00344694	0.000243837	0.00077108	0.0016783	0.000178587	0.000564743
Micrococcaceae	0.000669729	0.0651062	3.42189e-05	8.95918e-06	2.83314e-05	0.0165462	0.00662984	0.0209654
Bacteroidaceae	0.000669729	0.0651062	0	0	0	0.000694374	0.000220479	0.000697215
Streptococcaceae	0.000669729	0.0651062	0.00690506	0.00111483	0.00352539	0.0647604	0.0197197	0.0623591
Tannerellaceae	0.000768539	0.0651062	5.03469e-07	5.03469e-07	1.59211e-06	0.00245229	0.00147877	0.0046763
Peptoniphilaceae	0.000768539	0.0651062	1.47704e-07	1.47704e-07	4.67082e-07	0.000369521	0.000174306	0.000551203
Prevotellaceae	0.000880743	0.0652851	3.62448e-06	3.11373e-06	9.84646e-06	0.0724491	0.0216364	0.0684204
Atopobiaceae	0.00249691	0.118492	0	0	0	0.00096579	0.000594955	0.00188141
Kytococcaceae	0.00249691	0.118492	0	0	0	4.88749e-05	2.40508e-05	7.60555e-05
Porphyromonadaceae	0.00249691	0.118492	3.9663e-05	1.68852e-05	5.33957e-05	0.00950759	0.00313498	0.00991367
Eubacteriales_Family_XIII._Incertae_Sedis	0.00249691	0.118492	0	0	0	0.0036932	0.00228008	0.00721026
Actinomycetaceae	0.00282727	0.118492	1.08502e-05	7.89431e-06	2.4964e-05	0.0135149	0.00643447	0.0203476
Staphylococcaceae	0.0031971	0.118492	0.0463672	0.0362794	0.114726	0.00333288	0.000460081	0.0014549
Treponemataceae	0.0031971	0.118492	2.13437e-07	2.13437e-07	6.74948e-07	0.00686383	0.00579542	0.0183267
Flavobacteriaceae	0.0031971	0.118492	1.19318e-05	4.57578e-06	1.44699e-05	0.00964381	0.00366925	0.0116032
Comamonadaceae	0.00361051	0.125943	9.23027e-07	9.23027e-07	2.91887e-06	1.0131e-05	3.01943e-06	9.54826e-06
Weeksellaceae	0.00407199	0.127089	7.20608e-07	4.90548e-07	1.55125e-06	0.000140983	5.25757e-05	0.000166259
Odoribacteraceae	0.00407199	0.127089	2.84583e-07	2.84583e-07	8.99931e-07	1.93688e-05	9.63882e-06	3.04806e-05
Fusobacteriaceae	0.0065017	0.172626	5.98544e-05	3.53665e-05	0.000111839	0.00914961	0.00519564	0.01643
Pasteurellaceae	0.0065017	0.172626	0.000434482	0.000140193	0.000443328	0.0181087	0.00892813	0.0282332
Neisseriaceae	0.00815097	0.172626	0.00074616	0.000175542	0.000555112	0.00632234	0.00196533	0.00621492
Metschnikowiaceae	0.00815097	0.172626	2.203e-07	2.203e-07	6.96649e-07	4.47241e-06	2.51518e-06	7.95369e-06
Myoviridae	0.00815097	0.172626	0	0	0	9.20506e-05	4.44278e-05	0.000140493
Promicromonosporaceae	0.00815097	0.172626	0	0	0	6.93088e-05	2.81549e-05	8.90335e-05
Erysipelotrichaceae	0.00815097	0.172626	0	0	0	0.00311986	0.00183534	0.00580385
Muribaculaceae	0.00815097	0.172626	0	0	0	2.45545e-05	8.16659e-06	2.5825e-05
Eubacteriaceae	0.00815097	0.172626	0	0	0	7.74052e-05	3.85153e-05	0.000121796
Leptotrichiaceae	0.0113297	0.22395	2.21556e-07	2.21556e-07	7.00623e-07	0.00546684	0.00256061	0.00809735
Selenomonadaceae	0.0113297	0.22395	4.19558e-07	4.19558e-07	1.32676e-06	0.000829008	0.000547535	0.00173146
Listeriaceae	0.0126111	0.241239	0.00460437	0.00330272	0.0104441	0.00401182	0.000537233	0.00169888
Lachnospiraceae	0.0140193	0.259795	0.000107131	7.43472e-05	0.000235106	0.0108262	0.00520497	0.0164596
Pseudoalteromonadaceae	0.0155644	0.279688	0.0001732	0.000103845	0.000328387	0.000471887	0.000109702	0.000346907
Chlamydiaceae	0.0191099	0.314589	0.0313826	0.0227086	0.071811	0.0242369	0.00397606	0.0125734
Siphoviridae	0.0211339	0.314589	1.72562e-06	9.21301e-07	2.91341e-06	0.000154575	5.56856e-05	0.000176093
Sanguibacteraceae	0.0233422	0.314589	0	0	0	0.000230001	0.000161293	0.000510054
Carnobacteriaceae	0.0233422	0.314589	0.000831287	0.000757126	0.00239424	0.0026188	0.00125168	0.00395817
Coriobacteriaceae	0.0233422	0.314589	0	0	0	4.77419e-05	3.56512e-05	0.000112739
Cardiobacteriaceae	0.0233422	0.314589	0	0	0	8.06723e-06	3.84479e-06	1.21583e-05
Pyriculariaceae	0.0233422	0.314589	0	0	0	4.92968e-06	2.46383e-06	7.7913e-06
Rikenellaceae	0.0233422	0.314589	0	0	0	4.3891e-05	2.19326e-05	6.93571e-05
Mycoplasmataceae	0.0233422	0.314589	0	0	0	5.00756e-05	1.76472e-05	5.58054e-05
Acidaminococcaceae	0.0233422	0.314589	0	0	0	3.37402e-05	1.96221e-05	6.20506e-05
Thiovulaceae	0.0233422	0.314589	0	0	0	3.47324e-06	1.69407e-06	5.35711e-06
Gloeophyllaceae	0.0257481	0.339302	4.5643e-07	4.5643e-07	1.44336e-06	7.45505e-06	3.3052e-06	1.0452e-05
Helicobacteraceae	0.031209	0.402325	6.11854e-06	6.11854e-06	1.93485e-05	4.52395e-05	2.61797e-05	8.27874e-05
Pseudonocardiaceae	0.0376353	0.455464	1.56481e-06	1.56481e-06	4.94837e-06	6.72193e-06	1.81804e-06	5.74916e-06
Bifidobacteriaceae	0.0376353	0.455464	1.56061e-06	9.43347e-07	2.98313e-06	4.91099e-05	2.2511e-05	7.11859e-05
Nocardiaceae	0.0376353	0.455464	1.43507e-05	1.43507e-05	4.53808e-05	0.000124063	0.000116713	0.000369078
Spirosomaceae	0.04125	0.479633	4.29973e-07	4.29973e-07	1.35969e-06	1.09012e-05	5.47049e-06	1.72992e-05
Clostridiaceae	0.04125	0.479633	0.0016676	0.00149409	0.00472472	0.00146036	0.000410649	0.00129859
Propionibacteriaceae	0.0451546	0.484133	8.24062e-05	8.24062e-05	0.000260591	3.38744e-05	1.80378e-05	5.70406e-05
Streptomycetaceae	0.0493662	0.484133	1.70658e-05	8.48694e-06	2.68381e-05	5.43802e-05	2.14567e-05	6.7852e-05
Bacillaceae	0.0493662	0.484133	0.0062046	0.000982981	0.00310846	0.00398309	0.000536919	0.00169789
treat1.taxonomy.genus
Taxon	p value	adjust p value	HC mean	HC Standard Error of Mean	HC Standard Deviation	CRSwNP mean	CRSwNP Standard Error of Mean	CRSwNP Standard Deviation
Veillonella	0.000157052	0.11814	5.98311e-07	5.98311e-07	1.89203e-06	0.0173821	0.0070688	0.0223535
Bacteroides	0.000669729	0.11814	0	0	0	0.000552926	0.000168182	0.000531837
Streptococcus	0.000669729	0.11814	0.00690285	0.0011152	0.00352656	0.0647175	0.0197098	0.0623278
Capnocytophaga	0.000669729	0.11814	0	0	0	0.00951509	0.00361928	0.0114452
Actinomyces	0.000669729	0.11814	0	0	0	0.0115697	0.00575303	0.0181927
Granulicatella	0.000669729	0.11814	0	0	0	0.00234313	0.0012719	0.00402212
Tannerella	0.000669729	0.11814	0	0	0	0.0023596	0.00145222	0.00459231
Porphyromonas	0.000669729	0.11814	0	0	0	0.00918056	0.00304065	0.00961539
Peptostreptococcus	0.000669729	0.11814	0	0	0	0.00201725	0.000974281	0.00308095
Alloprevotella	0.000669729	0.11814	0	0	0	0.00684116	0.001748	0.00552766
Rothia	0.000880743	0.129469	5.9802e-07	3.98758e-07	1.26098e-06	0.0164291	0.00662518	0.0209507
Prevotella	0.000880743	0.129469	3.62448e-06	3.11373e-06	9.84646e-06	0.0636666	0.0197865	0.0625703
Parabacteroides	0.00100798	0.136775	5.03469e-07	5.03469e-07	1.59211e-06	9.1853e-05	3.06921e-05	9.70571e-05
Haemophilus	0.00149887	0.169406	7.39681e-05	7.36423e-05	0.000232877	0.0164863	0.00843982	0.026689
Staphylococcus	0.00193973	0.169406	0.0462909	0.0362623	0.114671	0.00314926	0.000458397	0.00144958
Aggregatibacter	0.00249691	0.169406	0	0	0	0.000426279	0.000260351	0.000823302
Kytococcus	0.00249691	0.169406	0	0	0	4.88749e-05	2.40508e-05	7.60555e-05
Lachnoanaerobaculum	0.00249691	0.169406	0	0	0	0.00231967	0.00109318	0.00345695
Schaalia	0.00249691	0.169406	0	0	0	0.000734781	0.000290533	0.000918747
Anaerococcus	0.00249691	0.169406	0	0	0	2.8102e-05	9.60245e-06	3.03656e-05
Eikenella	0.00249691	0.169406	0	0	0	4.45422e-05	2.48946e-05	7.87235e-05
Oribacterium	0.00249691	0.169406	0	0	0	0.00216024	0.00115576	0.00365483
Morococcus	0.00249691	0.169406	0	0	0	7.28871e-05	4.35337e-05	0.000137666
Peptoniphilus	0.00249691	0.169406	0	0	0	0.000166374	6.10372e-05	0.000193017
Odoribacter	0.00249691	0.169406	0	0	0	1.24157e-05	6.06179e-06	1.91691e-05
Gemella	0.00249691	0.169406	0	0	0	0.00185499	0.000824699	0.00260793
Flavobacterium	0.0031971	0.201417	1.91412e-06	8.89788e-07	2.81376e-06	4.3568e-05	1.83541e-05	5.80408e-05
Treponema	0.0031971	0.201417	2.13437e-07	2.13437e-07	6.74948e-07	0.00686383	0.00579542	0.0183267
Chryseobacterium	0.00515896	0.305922	7.20608e-07	4.90548e-07	1.55125e-06	2.74735e-05	1.16106e-05	3.67161e-05
Fusobacterium	0.0065017	0.305922	5.98544e-05	3.53665e-05	0.000111839	0.00914472	0.00519337	0.0164229
Clavispora	0.00815097	0.305922	2.203e-07	2.203e-07	6.96649e-07	4.0551e-06	2.10903e-06	6.66934e-06
Solobacterium	0.00815097	0.305922	0	0	0	0.00299104	0.00176327	0.00557594
Kocuria	0.00815097	0.305922	0	0	0	3.8319e-06	1.48418e-06	4.69337e-06
Blautia	0.00815097	0.305922	0	0	0	6.0051e-05	3.90327e-05	0.000123432
Mogibacterium	0.00815097	0.305922	0	0	0	0.00184124	0.00120796	0.00381991
Lysinibacillus	0.00815097	0.305922	0	0	0	1.69694e-05	1.22406e-05	3.87081e-05
Kingella	0.00815097	0.305922	0	0	0	2.40208e-05	9.79102e-06	3.09619e-05
Xylanimonas	0.00815097	0.305922	0	0	0	2.50927e-05	1.08646e-05	3.43568e-05
Roseburia	0.00815097	0.305922	0	0	0	5.92643e-05	2.66091e-05	8.41454e-05
Leptotrichia	0.00815097	0.305922	0	0	0	0.0053559	0.0025017	0.00791107
Avibacterium	0.00815097	0.305922	0	0	0	1.72055e-05	8.57908e-06	2.71294e-05
Gallibacterium	0.00815097	0.305922	0	0	0	2.23584e-05	8.75817e-06	2.76958e-05
Atopobium	0.00815097	0.305922	0	0	0	0.0001948	0.000127857	0.000404319
Paraprevotella	0.00815097	0.305922	0	0	0	2.83875e-05	1.17867e-05	3.72727e-05
Phocaeicola	0.00815097	0.305922	0	0	0	0.000104485	4.98753e-05	0.00015772
Mobiluncus	0.00815097	0.305922	0	0	0	3.70005e-06	1.25506e-06	3.96884e-06
Catonella	0.00815097	0.305922	0	0	0	0.000946187	0.000561953	0.00177705
Neisseria	0.0101652	0.373571	0.00074616	0.000175542	0.000555112	0.00583953	0.00183676	0.00580833
Selenomonas	0.0113297	0.399712	4.19558e-07	4.19558e-07	1.32676e-06	0.00073774	0.00051923	0.00164195
Rodentibacter	0.0113297	0.399712	3.35646e-07	3.35646e-07	1.06141e-06	7.05866e-05	3.22609e-05	0.000102018
Butyrivibrio	0.0126111	0.427809	3.45219e-06	2.06329e-06	6.5247e-06	0.00011856	6.75652e-05	0.00021366
Listeria	0.0126111	0.427809	0.00460437	0.00330272	0.0104441	0.00401182	0.000537233	0.00169888
Pseudoalteromonas	0.0155644	0.484419	0.0001732	0.000103845	0.000328387	0.000469705	0.000110197	0.000348472
Butyricimonas	0.0172575	0.484419	2.84583e-07	2.84583e-07	8.99931e-07	6.64011e-06	3.81507e-06	1.20643e-05
Chlamydia	0.0191099	0.484419	0.0313826	0.0227086	0.071811	0.0242369	0.00397606	0.0125734
Lactococcus	0.0191099	0.484419	2.20729e-06	1.61552e-06	5.10872e-06	2.22262e-05	7.97722e-06	2.52262e-05
Alistipes	0.0233422	0.484419	0	0	0	3.52764e-05	1.66012e-05	5.24975e-05
Prevotellamassilia	0.0233422	0.484419	0	0	0	1.64821e-05	7.60208e-06	2.40399e-05
Candidatus_Saccharimonas	0.0233422	0.484419	0	0	0	4.81146e-05	2.2995e-05	7.27165e-05
Bibersteinia	0.0233422	0.484419	0	0	0	2.492e-06	7.96448e-07	2.51859e-06
Caballeronia	0.0233422	0.484419	0	0	0	2.08357e-05	1.58085e-05	4.99909e-05
Massilimicrobiota	0.0233422	0.484419	0	0	0	9.50125e-06	3.8749e-06	1.22535e-05
Eubacterium	0.0233422	0.484419	0	0	0	6.50494e-05	3.27788e-05	0.000103656
Intestinibacillus	0.0233422	0.484419	0	0	0	2.8187e-06	1.17928e-06	3.7292e-06
Isoptericola	0.0233422	0.484419	0	0	0	4.29361e-05	1.90051e-05	6.00994e-05
Riemerella	0.0233422	0.484419	0	0	0	7.19129e-05	3.21171e-05	0.000101563
Faecalibacterium	0.0233422	0.484419	0	0	0	3.07078e-05	1.37485e-05	4.34766e-05
Ornithobacterium	0.0233422	0.484419	0	0	0	1.00335e-05	4.46468e-06	1.41186e-05
Sphingobacterium	0.0233422	0.484419	0	0	0	2.58141e-06	9.3684e-07	2.96255e-06
Mediterraneibacter	0.0233422	0.484419	0	0	0	4.52953e-05	2.90567e-05	9.18854e-05
Bergeyella	0.0233422	0.484419	0	0	0	7.11712e-06	2.37231e-06	7.50189e-06
Collinsella	0.0233422	0.484419	0	0	0	4.41349e-05	3.47236e-05	0.000109806
Olsenella	0.0233422	0.484419	0	0	0	1.4968e-05	7.0829e-06	2.23981e-05
Boudabousia	0.0233422	0.484419	0	0	0	5.63249e-06	3.55204e-06	1.12325e-05
Lancefieldella	0.0233422	0.484419	0	0	0	0.000701787	0.00043314	0.00136971
Mycoplasma	0.0233422	0.484419	0	0	0	4.36536e-05	1.67641e-05	5.30126e-05
Sanguibacter	0.0233422	0.484419	0	0	0	0.000230001	0.000161293	0.000510054
Pyricularia	0.0233422	0.484419	0	0	0	4.92968e-06	2.46383e-06	7.7913e-06
Photobacterium	0.0233422	0.484419	0	0	0	5.73283e-06	2.421e-06	7.65588e-06
Weissella	0.0233422	0.484419	0	0	0	2.87059e-06	1.16392e-06	3.68063e-06
Dorea	0.0233422	0.484419	0	0	0	2.33737e-05	9.96643e-06	3.15166e-05
Ruminococcus	0.0233422	0.484419	0	0	0	8.58845e-05	3.90591e-05	0.000123516
Conchiformibius	0.0233422	0.484419	0	0	0	1.36059e-05	1.01433e-05	3.20758e-05
Basfia	0.0233422	0.484419	0	0	0	2.87007e-05	2.09668e-05	6.63028e-05
Nevevirus	0.0233422	0.484419	0	0	0	5.80288e-06	2.11743e-06	6.69591e-06
Arthrobacter	0.0283655	0.581823	3.32852e-05	8.85476e-06	2.80012e-05	9.08869e-05	2.09705e-05	6.63147e-05
Helicobacter	0.031209	0.63279	6.11854e-06	6.11854e-06	1.93485e-05	4.52395e-05	2.61797e-05	8.27874e-05
Geotrichum	0.0342937	0.648068	4.87658e-06	2.47795e-06	7.83598e-06	9.22134e-08	9.22134e-08	2.91604e-07
Moraxella	0.0342937	0.648068	0.000194128	0.000189014	0.000597716	0.000395063	0.000309258	0.00097796
Bifidobacterium	0.0376353	0.648068	1.56061e-06	9.43347e-07	2.98313e-06	2.7364e-05	1.24271e-05	3.92979e-05
Clostridium	0.04125	0.648068	0.00166619	0.00149422	0.00472515	0.00138792	0.000380447	0.00120308
Rozella	0.0493662	0.648068	9.62817e-05	4.80399e-05	0.000151915	2.35469e-05	5.62994e-06	1.78034e-05
Bacillus	0.0493662	0.648068	0.00592757	0.000957862	0.00302903	0.00360525	0.000573706	0.00181422
Gammaretrovirus	0.0493662	0.648068	0.000231146	5.86449e-05	0.000185451	8.20503e-05	1.6469e-05	5.20796e-05

## Sheet: Table S5
Table S5. LEfSe-identified differential microbial taxa between CRSwNP and control groups
Biomarker	Abundance	Group	LDA	Pvalue
p__Proteobacteria.c__Gammaproteobacteria.o__Pasteurellales.f__Pasteurellaceae	4.90435			-
p__Firmicutes.c__Clostridia	4.82479			-
p__Bacteroidetes.c__Bacteroidia.o__Bacteroidales.f__Prevotellaceae.g__Alloprevotella	4.29184	CRSwNP-1	4.08969	0.000196437
p__Chlamydiae.c__Chlamydiia.o__Chlamydiales.f__Chlamydiaceae.g__Chlamydia.s__Chlamydia_abortus	4.66481			-
p__Firmicutes.c__Bacilli.o__Lactobacillales.f__Streptococcaceae.g__Streptococcus.s__Streptococcus_parasanguinis	4.29307	CRSwNP-1	4.02862	0.000196437
p__Proteobacteria.c__Gammaproteobacteria.o__Pseudomonadales.f__Pseudomonadaceae	4.66212	HC-1	4.24337	0.00407199
p__Proteobacteria.c__Betaproteobacteria.o__Burkholderiales	4.39448			-
p__Bacteroidetes.c__Bacteroidia.o__Bacteroidales.f__Prevotellaceae.g__Prevotella.s__Prevotella_salivae	4.1348	CRSwNP-1	3.8305	0.000642885
p__Firmicutes.c__Bacilli.o__Bacillales.f__Bacillaceae.g__Bacillus.s__Bacillus_pseudomycoides	4.60005	HC-1	4.27057	0.00249691
p__Firmicutes.c__Clostridia.o__Eubacteriales	4.84413			-
p__Chlamydiae.c__Chlamydiia	5.06776			-
p__Bacteroidetes.c__Bacteroidia.o__Bacteroidales.f__Porphyromonadaceae.g__Porphyromonas	4.37131	CRSwNP-1	4.13517	0.000196437
p__Firmicutes.c__Bacilli.o__Lactobacillales.f__Lactobacillaceae	4.11083			-
p__Chlamydiae	5.04733			-
p__Bacteroidetes.c__Bacteroidia.o__Bacteroidales.f__Prevotellaceae.g__Prevotella.s__Prevotella_shahii	4.07438	CRSwNP-1	3.83917	0.000196437
p__Firmicutes.c__Bacilli.o__Bacillales.f__Staphylococcaceae.g__Staphylococcus.s__Staphylococcus_aureus	5.11967	HC-1	4.74165	0.000506541
p__Proteobacteria.c__Gammaproteobacteria.o__Moraxellales.f__Moraxellaceae.g__Acinetobacter	4.38159	HC-1	3.98162	0.0191099
p__Proteobacteria.c__Gammaproteobacteria	5.42346	HC-1	4.78736	0.0191099
p__Actinobacteria.c__Actinomycetia.o__Actinomycetales.f__Actinomycetaceae.g__Actinomyces	4.31136	CRSwNP-1	4.01985	0.000196437
p__Fusobacteria.c__Fusobacteriia.o__Fusobacteriales.f__Fusobacteriaceae.g__Fusobacterium	4.24673	CRSwNP-1	3.92157	0.0186608
p__Spirochaetes.c__Spirochaetia	4.05151	CRSwNP-1	3.79189	0.000902676
p__Firmicutes.c__Bacilli.o__Lactobacillales.f__Streptococcaceae.g__Streptococcus.s__Streptococcus_salivarius	4.15456	CRSwNP-1	3.86783	0.000196437
p__Proteobacteria.c__Gammaproteobacteria.o__Pasteurellales.f__Pasteurellaceae.g__Haemophilus.s__Haemophilus_influenzae	4.7984	CRSwNP-1	4.49396	0.00336407
p__Firmicutes.c__Bacilli.o__Lactobacillales.f__Carnobacteriaceae	3.94141			-
p__Proteobacteria.c__Gammaproteobacteria.o__Pseudomonadales	4.64319	HC-1	4.22602	0.00407199
p__Firmicutes.c__Negativicutes	4.50109	CRSwNP-1	4.21154	0.000112545
p__Fusobacteria.c__Fusobacteriia.o__Fusobacteriales	4.40335	CRSwNP-1	4.06689	0.0122799
p__Proteobacteria.c__Epsilonproteobacteria	3.9579			-
p__Firmicutes.c__Bacilli.o__Bacillales.f__Staphylococcaceae.g__Staphylococcus.s__Staphylococcus_epidermidis	4.39588	HC-1	4.18077	0.0164119
p__Actinobacteria.c__Actinomycetia.o__Corynebacteriales.f__Mycobacteriaceae.g__Mycobacterium.s__Mycobacterium_tuberculosis	4.99353	HC-1	4.49288	0.00815097
p__Firmicutes.c__Bacilli.o__Bacillales	5.39268	HC-1	4.9709	0.000157052
p__Firmicutes.c__Bacilli.o__Bacillales.f__Listeriaceae.g__Listeria	4.3476			-
p__Spirochaetes.c__Spirochaetia.o__Spirochaetales.f__Treponemataceae	4.06521	CRSwNP-1	3.79996	0.0012506
p__Chlamydiae.c__Chlamydiia.o__Chlamydiales	5.07893			-
p__Proteobacteria.c__Epsilonproteobacteria.o__Campylobacterales	3.9634			-
p__Fusobacteria	4.38442	CRSwNP-1	4.04863	0.0122799
p__Bacteroidetes.c__Bacteroidia.o__Bacteroidales.f__Prevotellaceae.g__Prevotella.s__Prevotella_nanceiensis	4.06143	CRSwNP-1	3.87146	0.000642885
p__Firmicutes.c__Bacilli.o__Lactobacillales.f__Enterococcaceae	4.56579			-
p__Bacteroidetes.c__Bacteroidia.o__Bacteroidales.f__Prevotellaceae.g__Prevotella.s__Prevotella_pallens	4.4094	CRSwNP-1	4.13633	0.000196437
p__Actinobacteria	4.96663			-
p__Actinobacteria.c__Actinomycetia.o__Actinomycetales.f__Actinomycetaceae.g__Actinomyces.s__Actinomyces_sp__ICM47	4.09862	CRSwNP-1	3.83035	0.00190626
p__Actinobacteria.c__Actinomycetia.o__Actinomycetales	4.33604	CRSwNP-1	4.04389	0.0042666
p__Fusobacteria.c__Fusobacteriia.o__Fusobacteriales.f__Leptotrichiaceae.g__Leptotrichia.s__Leptotrichia_sp__oral_taxon_215	3.96504	CRSwNP-1	3.67979	0.00190626
p__Actinobacteria.c__Actinomycetia.o__Corynebacteriales.f__Mycobacteriaceae	4.89806	HC-1	4.43985	0.0126111
p__Planctomycetes.c__Planctomycetia.o__Pirellulales.f__Pirellulaceae	4.43654			-
p__Firmicutes.c__Bacilli.o__Lactobacillales.f__Streptococcaceae	5.23675	CRSwNP-1	4.65967	0.0342937
p__Proteobacteria.c__Gammaproteobacteria.o__Pasteurellales.f__Pasteurellaceae.g__Haemophilus	4.9046	CRSwNP-1	4.60196	0.00115665
p__Proteobacteria.c__Gammaproteobacteria.o__Enterobacterales.f__Enterobacteriaceae.g__Escherichia	4.84922	HC-1	4.43976	0.0031971
p__Firmicutes.c__Clostridia.o__Eubacteriales.f__Peptostreptococcaceae	4.73093			-
p__Proteobacteria.c__Gammaproteobacteria.o__Moraxellales.f__Moraxellaceae	4.5086	HC-1	4.06401	0.0342937
p__Bacteroidetes.c__Bacteroidia.o__Bacteroidales	5.27902	CRSwNP-1	5.0012	0.00247812
p__Bacteroidetes.c__Flavobacteriia.o__Flavobacteriales	4.3563	CRSwNP-1	4.0898	0.00315145
p__Proteobacteria.c__Gammaproteobacteria.o__Enterobacterales.f__Enterobacteriaceae.g__Salmonella.s__Salmonella_enterica	4.7494	HC-1	4.30168	0.0101652
p__Firmicutes.c__Clostridia.o__Eubacteriales.f__Lachnospiraceae	4.24807	CRSwNP-1	3.92459	0.0443481
p__Spirochaetes	4.03977	CRSwNP-1	3.78384	0.000902676
p__Firmicutes.c__Bacilli.o__Lactobacillales.f__Carnobacteriaceae.g__Granulicatella	3.64753	CRSwNP-1	3.54853	0.000196437
p__Bacteroidetes	5.31888	CRSwNP-1	5.0244	0.0031971
p__Bacteroidetes.c__Flavobacteriia	4.34873	CRSwNP-1	4.08278	0.00315145
p__Proteobacteria.c__Gammaproteobacteria.o__Enterobacterales	5.21879	HC-1	4.78491	0.00407199
p__Bacteroidetes.c__Bacteroidia.o__Bacteroidales.f__Tannerellaceae.g__Tannerella	3.62117	CRSwNP-1	3.45551	0.000196437
p__Proteobacteria.c__Gammaproteobacteria.o__Pasteurellales	4.89228			-
p__Arthropoda	3.94501			-
p__Proteobacteria.c__Gammaproteobacteria.o__Enterobacterales.f__Enterobacteriaceae	5.23623	HC-1	4.80405	0.0031971
p__Firmicutes.c__Bacilli.o__Lactobacillales.f__Enterococcaceae.g__Enterococcus.s__Enterococcus_faecium	4.48222			-
p__Bacteroidetes.c__Bacteroidia.o__Bacteroidales.f__Porphyromonadaceae.g__Porphyromonas.s__Porphyromonas_sp__oral_taxon_279	4.36372	CRSwNP-1	4.12219	0.000196437
p__Chlamydiae.c__Chlamydiia.o__Chlamydiales.f__Chlamydiaceae.g__Chlamydia.s__Chlamydia_trachomatis	4.69968	HC-1	4.03347	0.0101652
p__Bacteroidetes.c__Bacteroidia.o__Bacteroidales.f__Prevotellaceae.g__Prevotella.s__Prevotella_veroralis	3.92948	CRSwNP-1	3.65434	0.000642885
p__Planctomycetes.c__Planctomycetia.o__Pirellulales.f__Pirellulaceae.g__Blastopirellula.s__Blastopirellula_cremea	4.57495			-
p__Firmicutes.c__Erysipelotrichia.o__Erysipelotrichales.f__Erysipelotrichaceae	3.69862	CRSwNP-1	3.47432	0.00190626
p__Firmicutes.c__Bacilli.o__Lactobacillales.f__Streptococcaceae.g__Streptococcus.s__Streptococcus_mitis	4.23303	CRSwNP-1	4.00748	5.38e-05
p__Firmicutes.c__Bacilli.o__Lactobacillales.f__Lactobacillaceae.g__Lactiplantibacillus.s__Lactiplantibacillus_mudanjiangensis	4.11137			-
p__Firmicutes.c__Bacilli.o__Lactobacillales.f__Streptococcaceae.g__Streptococcus.s__Streptococcus_pneumoniae	4.97888			-
p__Planctomycetes.c__Planctomycetia.o__Pirellulales	4.41602			-
p__Firmicutes.c__Negativicutes.o__Veillonellales.f__Veillonellaceae.g__Veillonella.s__Veillonella_dispar	4.08368	CRSwNP-1	3.81587	0.000196437
p__Proteobacteria.c__Betaproteobacteria	4.50457			-
p__Firmicutes.c__Erysipelotrichia.o__Erysipelotrichales.f__Erysipelotrichaceae.g__Solobacterium.s__Solobacterium_moorei	4.05306	CRSwNP-1	3.76449	0.00190626
p__Firmicutes.c__Negativicutes.o__Veillonellales.f__Veillonellaceae.g__Veillonella	4.51059	CRSwNP-1	4.22226	7.41e-05
p__Actinobacteria.c__Actinomycetia	4.97177			-
p__Proteobacteria.c__Betaproteobacteria.o__Neisseriales.f__Neisseriaceae.g__Neisseria	4.29661			-
p__Proteobacteria.c__Gammaproteobacteria.o__Moraxellales.f__Moraxellaceae.g__Acinetobacter.s__Acinetobacter_baumannii	4.44922	HC-1	3.9549	0.04125
p__Proteobacteria.c__Epsilonproteobacteria.o__Campylobacterales.f__Campylobacteraceae.g__Campylobacter.s__Campylobacter_concisus	3.95466	CRSwNP-1	3.6417	0.00190626
p__Firmicutes.c__Bacilli.o__Bacillales.f__Listeriaceae.g__Listeria.s__Listeria_monocytogenes	4.50765			-
p__Fusobacteria.c__Fusobacteriia	4.39762	CRSwNP-1	4.0619	0.0122799
p__Spirochaetes.c__Spirochaetia.o__Spirochaetales.f__Treponemataceae.g__Treponema	4.09302	CRSwNP-1	3.80654	0.0012506
p__Firmicutes.c__Bacilli.o__Bacillales.f__Staphylococcaceae.g__Staphylococcus.s__Staphylococcus_simulans	4.50622	HC-1	4.16083	0.0065017
p__Firmicutes.c__Clostridia.o__Eubacteriales.f__Clostridiaceae	3.61977			-
p__Firmicutes.c__Erysipelotrichia.o__Erysipelotrichales.f__Erysipelotrichaceae.g__Solobacterium	3.72148	CRSwNP-1	3.49328	0.00190626
p__Actinobacteria.c__Actinomycetia.o__Micrococcales.f__Micrococcaceae.g__Rothia.s__Rothia_mucilaginosa	4.64806	CRSwNP-1	4.39663	0.000196437
p__Actinobacteria.c__Actinomycetia.o__Actinomycetales.f__Actinomycetaceae.g__Actinomyces.s__Actinomyces_graevenitzii	4.1463	CRSwNP-1	3.8399	0.000196437
p__Planctomycetes	4.37446			-
p__Firmicutes.c__Bacilli.o__Bacillales.f__Bacillaceae	4.81942	HC-1	4.40798	0.00149887
p__Fusobacteria.c__Fusobacteriia.o__Fusobacteriales.f__Leptotrichiaceae	3.97009	CRSwNP-1	3.66223	0.00425974
p__Planctomycetes.c__Planctomycetia.o__Pirellulales.f__Pirellulaceae.g__Blastopirellula	4.50423	HC-1	4.07966	0.0493662
p__Firmicutes.c__Clostridia.o__Eubacteriales.f__Eubacteriales_Family_XIII__Incertae_Sedis	3.77033	CRSwNP-1	3.59071	0.000642885
p__Bacteroidetes.c__Bacteroidia.o__Bacteroidales.f__Porphyromonadaceae	4.36107	CRSwNP-1	4.11599	0.00259345
p__Bacteroidetes.c__Bacteroidia.o__Bacteroidales.f__Prevotellaceae	5.21556	CRSwNP-1	4.93994	0.000488254
p__Firmicutes.c__Clostridia.o__Eubacteriales.f__Peptostreptococcaceae.g__Peptostreptococcus	3.59902	CRSwNP-1	3.49701	0.000196437
p__Firmicutes.c__Negativicutes.o__Veillonellales.f__Veillonellaceae	4.49877	CRSwNP-1	4.21146	9.42e-05
p__Bacteroidetes.c__Bacteroidia.o__Bacteroidales.f__Prevotellaceae.g__Prevotella.s__Prevotella_histicola	4.20405	CRSwNP-1	3.94353	0.000642885
p__Fusobacteria.c__Fusobacteriia.o__Fusobacteriales.f__Fusobacteriaceae.g__Fusobacterium.s__Fusobacterium_nucleatum	3.9526	CRSwNP-1	3.76492	0.000642885
p__Firmicutes.c__Bacilli.o__Lactobacillales.f__Streptococcaceae.g__Streptococcus.s__Streptococcus_intermedius	4.50116			-
p__Chlamydiae.c__Chlamydiia.o__Chlamydiales.f__Chlamydiaceae	5.09457			-
p__Bacteroidetes.c__Flavobacteriia.o__Flavobacteriales.f__Flavobacteriaceae	4.36248	CRSwNP-1	4.09602	0.0080554
p__Bacteroidetes.c__Flavobacteriia.o__Flavobacteriales.f__Flavobacteriaceae.g__Capnocytophaga	4.38525	CRSwNP-1	4.1183	0.000196437
p__Proteobacteria.c__Gammaproteobacteria.o__Enterobacterales.f__Enterobacteriaceae.g__Escherichia.s__Escherichia_coli	4.92193	HC-1	4.44706	0.0065017
p__Actinobacteria.c__Actinomycetia.o__Corynebacteriales	4.90977	HC-1	4.44119	0.0155644
p__Firmicutes.c__Bacilli.o__Bacillales.f__Staphylococcaceae	5.18342	HC-1	4.83356	0.000212183
p__Fusobacteria.c__Fusobacteriia.o__Fusobacteriales.f__Fusobacteriaceae	4.21894	CRSwNP-1	3.90045	0.0122799
p__Artverviricota	4.50204	HC-1	4.16921	0.000880743
p__Bacteroidetes.c__Bacteroidia.o__Bacteroidales.f__Prevotellaceae.g__Prevotella.s__Prevotella_melaninogenica	4.72782	CRSwNP-1	4.47237	0.000196437
p__Artverviricota.c__Revtraviricetes	4.52286	HC-1	4.18606	0.000880743
p__Firmicutes.c__Erysipelotrichia.o__Erysipelotrichales	3.69239	CRSwNP-1	3.46993	0.00190626
p__Proteobacteria.c__Gammaproteobacteria.o__Pseudomonadales.f__Pseudomonadaceae.g__Pseudomonas.s__Pseudomonas_viridiflava	4.66122	HC-1	4.20131	0.0342937
p__Actinobacteria.c__Actinomycetia.o__Micrococcales	4.59791	CRSwNP-1	4.34068	0.0065017
p__Firmicutes.c__Bacilli.o__Lactobacillales.f__Streptococcaceae.g__Streptococcus	5.26539			-
p__Actinobacteria.c__Actinomycetia.o__Micrococcales.f__Micrococcaceae.g__Rothia	4.62638	CRSwNP-1	4.37649	0.000872794
p__Proteobacteria	5.47327	HC-1	4.77693	0.0283655
p__Proteobacteria.c__Gammaproteobacteria.o__Enterobacterales.f__Enterobacteriaceae.g__Enterobacter	4.27908			-
p__Firmicutes.c__Bacilli.o__Lactobacillales.f__Streptococcaceae.g__Streptococcus.s__Streptococcus_infantis	4.2607	CRSwNP-1	4.01864	0.000196437
p__Firmicutes.c__Negativicutes.o__Veillonellales	4.48649	CRSwNP-1	4.19927	9.42e-05
p__Actinobacteria.c__Actinomycetia.o__Actinomycetales.f__Actinomycetaceae	4.34772	CRSwNP-1	4.05526	0.0026399
p__Firmicutes	5.64734			-
p__Artverviricota.c__Revtraviricetes.o__Ortervirales.f__Retroviridae	4.56247	HC-1	4.22079	0.000880743
p__Artverviricota.c__Revtraviricetes.o__Ortervirales	4.54238	HC-1	4.20716	0.000880743
p__Firmicutes.c__Bacilli.o__Lactobacillales.f__Lactobacillaceae.g__Lactiplantibacillus	4.04155			-
p__Spirochaetes.c__Spirochaetia.o__Spirochaetales	4.05526	CRSwNP-1	3.7956	0.0012506
p__Firmicutes.c__Clostridia.o__Eubacteriales.f__Clostridiaceae.g__Clostridium	3.65919			-
p__Proteobacteria.c__Betaproteobacteria.o__Neisseriales.f__Neisseriaceae	4.29193			-
p__Chlamydiae.c__Chlamydiia.o__Chlamydiales.f__Chlamydiaceae.g__Chlamydia.s__Chlamydia_psittaci	4.44631			-
p__Fusobacteria.c__Fusobacteriia.o__Fusobacteriales.f__Fusobacteriaceae.g__Fusobacterium.s__Fusobacterium_periodonticum	4.36194	CRSwNP-1	4.04949	0.000642885
p__Actinobacteria.c__Actinomycetia.o__Corynebacteriales.f__Mycobacteriaceae.g__Mycobacterium	4.91996	HC-1	4.496	0.0031971
p__Proteobacteria.c__Epsilonproteobacteria.o__Campylobacterales.f__Campylobacteraceae	3.96691			-
p__Bacteroidetes.c__Bacteroidia	5.27272	CRSwNP-1	4.99292	0.0100521
p__Bacteroidetes.c__Bacteroidia.o__Bacteroidales.f__Prevotellaceae.g__Prevotella.s__Prevotella_jejuni	3.95263	CRSwNP-1	3.77202	0.000642885
p__Firmicutes.c__Clostridia.o__Eubacteriales.f__Lachnospiraceae.g__Oribacterium	3.57678	CRSwNP-1	3.41192	0.000642885
p__Proteobacteria.c__Gammaproteobacteria.o__Pasteurellales.f__Pasteurellaceae.g__Haemophilus.s__Haemophilus_parainfluenzae	4.34512	CRSwNP-1	4.12249	0.000325373
p__Firmicutes.c__Bacilli.o__Bacillales.f__Bacillaceae.g__Bacillus	4.86961	HC-1	4.46871	0.00149887
p__Firmicutes.c__Clostridia.o__Eubacteriales.f__Peptostreptococcaceae.g__Clostridioides.s__Clostridioides_difficile	4.86554			-
p__Proteobacteria.c__Gammaproteobacteria.o__Moraxellales	4.48899	HC-1	4.04591	0.0342937
p__Firmicutes.c__Erysipelotrichia	3.68563	CRSwNP-1	3.46539	0.00190626
p__Proteobacteria.c__Gammaproteobacteria.o__Pseudomonadales.f__Pseudomonadaceae.g__Pseudomonas	4.7357	HC-1	4.32612	0.00407199
p__Bacteroidetes.c__Flavobacteriia.o__Flavobacteriales.f__Flavobacteriaceae.g__Capnocytophaga.s__Capnocytophaga_sp__oral_taxon_329	4.16333	CRSwNP-1	3.91473	0.000642885
p__Proteobacteria.c__Betaproteobacteria.o__Burkholderiales.f__Burkholderiaceae	4.39521	HC-1	4.01423	0.04125
p__Proteobacteria.c__Gammaproteobacteria.o__Enterobacterales.f__Enterobacteriaceae.g__Enterobacter.s__Enterobacter_hormaechei	4.29587			-
p__Proteobacteria.c__Epsilonproteobacteria.o__Campylobacterales.f__Campylobacteraceae.g__Campylobacter	3.99752			-
p__Bacteroidetes.c__Bacteroidia.o__Bacteroidales.f__Tannerellaceae	3.61207	CRSwNP-1	3.50632	0.000325373
p__Firmicutes.c__Negativicutes.o__Veillonellales.f__Veillonellaceae.g__Veillonella.s__Veillonella_atypica	4.05708	CRSwNP-1	3.76905	0.000642885
p__Bacteroidetes.c__Bacteroidia.o__Bacteroidales.f__Prevotellaceae.g__Prevotella	5.18201	CRSwNP-1	4.90149	0.000488254
p__Planctomycetes.c__Planctomycetia	4.39565			-
p__Fusobacteria.c__Fusobacteriia.o__Fusobacteriales.f__Leptotrichiaceae.g__Leptotrichia	3.99428	CRSwNP-1	3.68339	0.00190626
p__Proteobacteria.c__Gammaproteobacteria.o__Enterobacterales.f__Enterobacteriaceae.g__Salmonella	4.67216	HC-1	4.28333	0.0065017
p__Firmicutes.c__Bacilli.o__Lactobacillales.f__Enterococcaceae.g__Enterococcus	4.62951			-
p__Firmicutes.c__Bacilli.o__Lactobacillales.f__Enterococcaceae.g__Enterococcus.s__Enterococcus_faecalis	4.39581			-
p__Firmicutes.c__Bacilli.o__Bacillales.f__Listeriaceae	4.29424			-
p__Firmicutes.c__Bacilli.o__Lactobacillales	5.31073			-
p__Chlamydiae.c__Chlamydiia.o__Chlamydiales.f__Chlamydiaceae.g__Chlamydia	5.15283			-
p__Proteobacteria.c__Betaproteobacteria.o__Neisseriales	4.27433			-
p__Firmicutes.c__Bacilli.o__Bacillales.f__Staphylococcaceae.g__Staphylococcus	5.22871	HC-1	4.88557	0.000157052
p__Firmicutes.c__Clostridia.o__Eubacteriales.f__Peptostreptococcaceae.g__Clostridioides	4.80066			-
p__Firmicutes.c__Clostridia.o__Eubacteriales.f__Lachnospiraceae.g__Lachnoanaerobaculum	3.63353	CRSwNP-1	3.40179	0.000642885
p__Proteobacteria.c__Gammaproteobacteria.o__Enterobacterales.f__Enterobacteriaceae.g__Klebsiella	4.42042	HC-1	3.99525	0.0283655
p__Proteobacteria.c__Gammaproteobacteria.o__Enterobacterales.f__Enterobacteriaceae.g__Klebsiella.s__Klebsiella_pneumoniae	4.41293			-
p__Actinobacteria.c__Actinomycetia.o__Micrococcales.f__Micrococcaceae	4.59981	CRSwNP-1	4.34892	0.00193973
p__Firmicutes.c__Bacilli	5.57146	HC-1	4.75417	0.0191099

## Sheet: Table S6
										Table S6. Quantitative data of detected metabolites in CRSwNP and control groups
#ID	HC-1	HC-2	HC-3	HC-4	HC-5	HC-6	HC-7	HC-8	HC-9	HC-10	HC-11	HC-12	HC-13	HC-14	HC-15	HC-16	HC-17	HC-18	HC-19	CRSwNP-1	CRSwNP-2	CRSwNP-3	CRSwNP-4	CRSwNP-5	CRSwNP-6	CRSwNP-7	CRSwNP-8	CRSwNP-9	CRSwNP-10	CRSwNP-11	CRSwNP-12	CRSwNP-13	CRSwNP-14	CRSwNP-15	CRSwNP-16	CRSwNP-17	CRSwNP-18	CRSwNP-19	CRSwNP-20	QC-1	QC-2	QC-3	QC-4	QC-5
neg_1	37.1599	127.076	112.909	88.238	75.3188	118.949	46.4049	51.1375	86.0116	47.6816	117.719	38.6789	111.178	45.4567	52.2074	125.022	83.7892	71.8404	50.363	28.1015	88.0343	41.2837	41.9231	16.3252	22.3337	14.2478	64.57	77.8406	26.7056	16.4617	26.5267	27.2188	27.1529	29.2169	51.3785	31.1636	80.7435	27.164	51.634	42.2568	63.8504	41.2856	62.0734	33.5058
neg_100	48.6373	95.1919	79.5981	21.7518	69.6024	8.7417	22.13	7.43587	33.7768	1.61e-08	13.7833	31.4017	70.7311	71.3918	41.0466	92.4997	56.3796	63.0306	103.34	25.4407	40.2638	28.133	33.7433	8.29252	27.3534	34.5675	35.3047	40.3216	48.6844	4.5978	55.9319	26.2171	50.8452	54.652	60.8922	37.6754	43.5405	56.8742	28.1035	62.1825	73.5158	63.819	71.4939	58.2065
neg_101	88.7819	66.2252	61.8396	17.3428	59.8593	18.1587	12.8497	3.58943	18.6864	1.61e-08	8.43564	17.6133	61.0129	55.8693	23.8571	66.1858	38.1228	50.4583	76.8534	23.1136	28.9197	25.7958	26.1484	2.81528	19.5412	24.7304	29.8317	38.0898	35.4319	7.87015	51.6575	14.7137	31.665	46.141	41.8734	33.6673	16.4023	44.6473	15.7835	52.8912	63.6186	48.8512	61.3576	44.0738
neg_1015	10.5284	1.61e-08	1.61e-08	5.11229	3.2244	22.1735	1.61e-08	1.05669	2.91118	1.61e-08	1.61e-08	1.61e-08	1.61e-08	1.61e-08	6.16609	1.61e-08	1.61e-08	1.61e-08	1.61e-08	108.164	1.61e-08	10.5663	7.89573	41.2523	5.49339	3.38724	38.2806	7.87057	3.00324	18.6258	1.61e-08	80.9513	0.826562	1.61e-08	1.61e-08	4.2573	1.61e-08	1.61e-08	1.61e-08	23.8371	19.8275	17.3243	21.9904	11.7205
neg_1016	166.472	23.3162	43.8041	173.587	196.517	374.563	88.0164	106.072	215.717	1.61e-08	1.61e-08	47.9897	45.1922	26.9219	164.782	44.4768	24.6116	18.9861	72.6284	1263.67	29.2208	174.617	233.877	465.287	89.6469	47.776	562.075	236.352	57.2995	195.333	15.8365	914.955	42.0327	12.3205	11.5501	76.4888	1.61e-08	8.11575	1.61e-08	308.596	278.704	296.776	334.327	193.944
neg_102	4.30234	36.1223	18.6889	2.98247	17.4789	1.61e-08	1.61e-08	1.61e-08	3.43344	1.61e-08	1.61e-08	3.66941	22.976	37.2244	7.57772	41.7925	26.9652	30.3834	69.1722	6.72635	10.9644	3.91117	5.67636	0.772972	8.28452	18.2367	8.7984	8.14016	13.1293	0.84494	19.8854	8.85571	27.2602	27.1773	11.7863	15.1358	19.2224	30.2126	1.88885	23.7985	26.244	25.4648	27.8623	20.8332
neg_1021	13.4179	1.61e-08	1.61e-08	2.06316	1.61e-08	12.2816	1.61e-08	1.61e-08	5.38896	1.61e-08	1.61e-08	1.61e-08	1.61e-08	1.61e-08	6.424	1.61e-08	1.61e-08	1.61e-08	1.05507	83.6847	1.61e-08	20.5812	4.88568	40.9552	6.45253	1.54059	62.8811	20.6839	6.20994	17.3482	1.61e-08	49.2412	1.61e-08	1.61e-08	1.61e-08	5.32269	1.61e-08	1.61e-08	1.61e-08	23.7462	31.7354	17.9642	33.2996	9.00454
neg_1023	3.75031	1.61e-08	1.61e-08	1.61e-08	1.77768	10.7694	1.61e-08	1.61e-08	1.18937	1.61e-08	1.61e-08	1.61e-08	1.61e-08	1.61e-08	3.49312	1.61e-08	1.61e-08	1.61e-08	1.61e-08	1.93248	1.61e-08	5.06028	3.01609	1.61e-08	2.56697	1.29677	3.9419	1.88721	1.59303	1.61e-08	1.61e-08	1.61e-08	0.330685	1.61e-08	1.61e-08	2.09517	1.61e-08	1.61e-08	1.61e-08	4.14343	6.08283	2.75042	6.52022	3.13822
neg_1024	7.82367	1.61e-08	1.61e-08	5.34865	1.61e-08	14.6605	1.92353	1.19983	4.89745	1.61e-08	1.61e-08	1.01847	1.84268	1.61e-08	6.03806	1.61e-08	1.61e-08	1.61e-08	1.26005	10.9238	1.61e-08	6.09141	4.77331	5.01634	3.05577	0.885815	22.373	5.88784	3.1338	3.28422	1.61e-08	12.3584	1.61e-08	1.61e-08	1.61e-08	4.42092	1.61e-08	1.61e-08	1.61e-08	10.1233	9.54738	8.44307	11.2009	5.93136
neg_103	64.1577	20.1474	1.61e-08	1.61e-08	4.36655	1.61e-08	1.61e-08	1.61e-08	1.61e-08	1.61e-08	1.61e-08	1.61e-08	7.53435	23.0924	1.61e-08	119.528	12.2773	27.5123	51.1538	8.11121	3.53787	4.12888	1.61e-08	1.09151	24.6129	17.2906	1.61e-08	1.61e-08	34.8769	1.61e-08	63.8727	7.23204	31.4015	8.60988	5.12498	7.76808	28.242	19.9316	1.61e-08	11.2872	14.4312	13.4839	12.5543	12.356
neg_1038	1.61e-08	1.61e-08	1.61e-08	1.61e-08	1.61e-08	1.61e-08	1.61e-08	1.61e-08	1.61e-08	1.61e-08	1.61e-08	1.61e-08	1.61e-08	1.61e-08	3.81986	4.0857	1.61e-08	1.61e-08	1.61e-08	31.2109	1.61e-08	8.58829	1.61e-08	52.0137	1.61e-08	1.61e-08	14.3321	1.61e-08	1.61e-08	232.16	1.61e-08	116.902	1.61e-08	1.61e-08	1.61e-08	1.61e-08	1.61e-08	1.61e-08	1.61e-08	11.4657	5.1059	3.14219	7.22184	8.80901
neg_104	503.204	806.407	453.036	155.691	366.819	129.484	93.2156	49.9144	317.632	1.61e-08	234.102	133.158	595.649	521.199	235.376	1051.91	503.308	541.767	837.433	211.141	268.237	225.053	153.177	91.4441	353.969	417.255	266.677	310.811	480.91	99.7822	641.901	232.725	513.79	441.14	301.059	304.953	519.109	469.504	145.413	446.178	544.586	453.236	498.42	404.979
neg_1040	1.61e-08	1.61e-08	1.61e-08	1.61e-08	1.61e-08	1.61e-08	1.61e-08	1.61e-08	30.3759	1.61e-08	1.61e-08	1.61e-08	1.61e-08	308.027	1.61e-08	1177.45	1.61e-08	1.61e-08	1609.27	1.61e-08	1.61e-08	1.61e-08	1.61e-08	1.61e-08	1.61e-08	1.61e-08	1.61e-08	1.61e-08	1.61e-08	1.61e-08	1.61e-08	1.61e-08	35.2106	79.9666	1.61e-08	1.61e-08	1.61e-08	1.61e-08	1.61e-08	43.9077	43.2571	33.7352	47.3661	33.6526
neg_1042	1.61e-08	1.61e-08	1.61e-08	1.61e-08	1.61e-08	1.61e-08	1.61e-08	1.61e-08	552.011	1.61e-08	1.61e-08	1.61e-08	55.4202	1878.03	131.007	6279.82	5.47681	81.3644	9227.84	5.76457	1.61e-08	1.61e-08	1.61e-08	1.61e-08	1.61e-08	1.61e-08	1.61e-08	1.61e-08	1.61e-08	1.61e-08	1.61e-08	1.61e-08	286.292	542.806	1.61e-08	1.61e-08	1.61e-08	1.61e-08	1.61e-08	413.277	490.31	393.419	460.132	321.208
neg_1046	1.61e-08	1.61e-08	1.61e-08	1.61e-08	1.61e-08	1.61e-08	1.61e-08	1.61e-08	11.1353	1.61e-08	1.61e-08	1.61e-08	1.61e-08	17.4783	1.61e-08	38.2773	1.61e-08	1.61e-08	55.542	1.61e-08	1.61e-08	1.61e-08	1.61e-08	1.61e-08	1.61e-08	1.61e-08	1.61e-08	1.61e-08	1.61e-08	1.61e-08	1.61e-08	1.61e-08	7.52284	12.1867	1.61e-08	1.61e-08	1.61e-08	1.61e-08	1.61e-08	8.87165	11.9673	8.89612	10.4723	2.74769
neg_1047	1.61e-08	1.61e-08	1.61e-08	1.61e-08	1.61e-08	1.61e-08	1.61e-08	1.61e-08	28.7643	1.61e-08	1.61e-08	1.61e-08	1.61e-08	105.846	1.61e-08	375.146	1.61e-08	4.77736	240.641	1.61e-08	1.61e-08	1.61e-08	1.61e-08	1.28722	1.61e-08	1.61e-08	1.61e-08	1.61e-08	1.61e-08	1.61e-08	1.61e-08	1.61e-08	16.1214	32.1345	1.61e-08	1.61e-08	1.61e-08	1.61e-08	1.61e-08	21.81	18.4521	17.6243	25.0053	14.7431
neg_105	39.8163	48.5333	12.1204	1.61e-08	14.3118	1.61e-08	1.61e-08	1.61e-08	2.925	1.61e-08	1.61e-08	1.61e-08	29.8137	36.28	4.61427	111.935	32.0086	40.6819	86.3205	13.5057	1.61e-08	20.8609	1.61e-08	5.10197	36.9419	32.4043	10.1662	11.1879	41.0619	2.2626	42.1979	0.179194	53.5319	22.0473	10.874	16.3224	25.2567	24.3858	1.61e-08	22.1059	27.609	25.1923	20.4812	24.8818
neg_1059	1.61e-08	1.61e-08	1.61e-08	1.61e-08	1.61e-08	1.61e-08	1.61e-08	1.61e-08	1.61e-08	1.61e-08	1.61e-08	1.61e-08	1.61e-08	1.61e-08	22.4702	1.61e-08	1.61e-08	1.61e-08	1.61e-08	79.9679	1.61e-08	1.61e-08	1.61e-08	112.381	1.61e-08	1.61e-08	13.0295	1.61e-08	1.61e-08	519.403	1.61e-08	514.233	1.61e-08	1.61e-08	1.61e-08	1.61e-08	1.61e-08	1.61e-08	1.61e-08	16.5298	13.5478	13.1481	22.3589	11.3432
neg_106	33.6349	57.0042	12.9689	3.94599	21.0645	1.61e-08	1.61e-08	2.14554	23.5064	1.61e-08	8.03155	4.32948	39.0193	46.9376	10.2907	97.2223	45.4084	48.8602	104.248	19.7834	15.0221	7.55664	4.48228	3.49804	28.4005	35.2622	20.5172	18.7617	48.9093	4.86289	62.3768	20.6641	47.5418	35.181	17.9404	23.8712	38.1399	36.7875	2.74279	36.626	39.156	33.2012	39.3413	32.3172
neg_1063	1.61e-08	1.61e-08	1.61e-08	1.61e-08	1.61e-08	1.61e-08	1.61e-08	1.61e-08	1.61e-08	1.61e-08	1.61e-08	1.61e-08	1.61e-08	1.61e-08	55.7071	1.61e-08	1.61e-08	1.61e-08	1.61e-08	134.469	1.61e-08	3.75398	1.61e-08	69.706	1.61e-08	1.61e-08	8.85253	1.61e-08	1.61e-08	485.258	1.61e-08	646.418	1.61e-08	1.61e-08	1.61e-08	1.61e-08	1.61e-08	1.61e-08	1.61e-08	32.5959	28.7276	26.7657	33.5582	21.6462
neg_107	103.545	24.5629	12.5207	1.61e-08	24.9146	1.61e-08	11.6155	5.00034	1.61e-08	1.61e-08	3.25712	7.30355	13.1643	34.4305	10.6206	151.195	20.1518	34.5264	58.8795	5.58224	1.61e-08	5.57814	10.2409	3.516	34.5487	30.8571	8.40578	17.8117	57.2575	2.61854	96.1543	8.33187	39.4264	20.5559	15.1119	9.47861	37.7685	23.7602	12.6251	15.7766	28.4955	14.5353	24.8819	18.6744
neg_1072	30.2945	69.4666	61.5695	40.067	56.0471	51.1402	45.2602	13.2541	32.2883	23.6651	129.196	239.431	56.4387	31.6813	66.015	61.3311	34.9062	77.8636	26.0222	11.277	25.3468	148.462	53.7774	12.0839	28.0273	27.9438	22.9626	24.7395	18.7716	12.617	22.9586	24.9869	19.9369	35.4425	26.1879	17.445	30.8075	32.5961	102.551	30.9109	39.6241	32.0142	36.3171	36.6867
neg_1077	192.109	30.9201	121.389	37.8276	90.8872	4.90719	57.8249	25.7437	111.41	1.61e-08	156.211	104.718	1.61e-08	190.035	44.8132	26.6053	75.1444	80.229	90.2685	74.6231	1.61e-08	181.764	6.99765	53.8155	339.63	419.894	46.9003	10.8747	222.938	83.8091	204.503	38.7561	318.469	317.034	1.61e-08	380.741	91.8335	417.407	175.851	42.4532	38.0723	44.5781	50.2826	45.1237
neg_108	155.608	42.8577	28.2291	1.61e-08	21.8394	6.5e-06	1.61e-08	5.16224	4.28936	1.61e-08	99.4932	2.09524	34.0914	67.6877	10.7348	207.135	39.6635	66.5696	128.812	29.6042	1.61e-08	22.4966	9.9027	5.57689	42.3365	56.3328	9.06131	13.7638	93.8361	4.90174	127.422	11.1331	56.9667	46.9531	20.269	23.7585	25.378	49.0923	1.61e-08	42.1275	42.5037	43.2499	39.4445	38.6907
neg_1080	47.9303	125.839	110.092	54.8153	66.5653	85.4167	39.3637	24.8759	38.7303	43.0683	100.179	58.2859	88.6612	30.3661	73.9638	60.3028	54.5509	51.1214	38.7675	19.8009	58.276	22.5133	31.8854	10.4924	18.4263	18.7209	32.1772	42.0822	16.279	9.75668	29.9007	21.7536	21.2507	21.5607	30.9412	17.7195	54.6799	26.6188	29.6917	35.7004	39.7736	38.4946	52.37	31.9655
neg_1083	2085.82	1.61e-08	1.61e-08	1.61e-08	8.46266	1.61e-08	13.9323	1.61e-08	1.61e-08	1.61e-08	1.61e-08	1.61e-08	1.61e-08	170.603	1.61e-08	1.61e-08	1.61e-08	26.0116	184.681	5781.99	14.4465	217.702	11.8653	784.896	1372.42	1812.68	1.61e-08	1.61e-08	12791.8	1510.24	2140.69	3356.78	634.219	21.3899	1.61e-08	1342.29	1.61e-08	1722.72	1.61e-08	251.434	24.2198	212.819	121.352	169.56
neg_1086	132.078	26.7541	34.9259	225.781	68.2426	256.778	284.382	802.128	272.676	1.61e-08	27.2712	96.6163	10.5206	102.782	338.991	43.9611	54.8105	82.8565	48.3619	300.829	281.954	98.4568	390.353	756.431	431.78	427.884	328.568	270.836	221.278	277.584	111.067	215.018	40.5087	71.284	38.3013	64.7157	48.0733	35.6569	17.8898	200.154	166.62	178.179	238.487	114.924
neg_1088	3.55222	22.3915	15.2818	19.9486	11.9335	19.106	14.1672	28.0494	15.8609	9.83082	46.9926	30.5076	22.1815	47.1653	22.0504	24.7811	23.0078	22.4101	30.0996	16.6453	16.3713	43.1352	15.5179	19.1455	37.2059	28.0087	19.4323	31.5258	10.1387	7.55729	25.3664	4.95431	22.3626	43.9464	50.6868	43.9924	88.1969	21.4681	32.6644	21.749	28.6633	18.7526	27.6748	22.4375
neg_109	469.425	582.599	309.477	116.682	247.362	77.8131	54.7592	18.6635	233.993	1.61e-08	163.072	88.8656	474.531	431.917	168.775	954.459	413.878	457.608	741.122	178.306	196.803	162.686	114.202	75.3269	300.711	355.674	198.946	234.062	431.399	85.7001	541.445	166.925	406.629	328.196	221.675	217.225	406.83	363.735	86.2833	331.616	426.033	344.539	390.932	309.593
neg_1092	37.0853	1.61e-08	1.61e-08	1.61e-08	1.61e-08	1.61e-08	3.39527	1.61e-08	1.61e-08	1.61e-08	1.61e-08	1.61e-08	1.61e-08	8.2634	1.61e-08	1.61e-08	1.61e-08	1.61e-08	3.88631	269.891	1.61e-08	67.4643	32.8155	174.07	295.588	66.6544	9.90155	1.61e-08	705.373	61.1784	179.706	345	16.543	3.22053	1.61e-08	190.675	1.61e-08	309.838	1.61e-08	41.9917	8.7204	41.8201	38.0597	12.3985
neg_1093	119.442	1.61e-08	4.03056	1.61e-08	24.9919	4.22909	14.6849	1.61e-08	1.61e-08	1.61e-08	1.61e-08	5.83761	1.61e-08	22.9403	3.3	26.0069	8.00356	28.0993	38.9667	383.134	1.61e-08	89.6392	64.9642	138.168	388.443	80.0244	41.7588	1.61e-08	982.324	92.2026	227.849	222.205	26.6934	6.63182	1.61e-08	167.455	22.6562	285.013	1.61e-08	74.2539	56.6785	83.3373	70.322	59.4669
neg_1096	76.8081	137.869	4.86397	102.18	7.57265	16.8901	138.666	149.698	534.346	1.61e-08	2450.31	101.847	1.61e-08	119.865	3582.74	30.5592	55.0884	3501.5	78.9924	86.7453	239.788	235.702	72.6804	296.964	338.144	281.414	46.8266	972.881	91.8503	231.028	161.09	44.3485	201.108	521.142	23.6124	129.703	834.512	377.654	1335.98	683.109	419.839	713.54	628.965	298.839
neg_1099	10.4185	21.9027	33.6073	295.878	223.532	201.393	95.4758	366.687	358.431	19.4278	364.839	331.755	179.836	585.816	73.2046	207.312	559.953	339.136	272.58	199.843	389.491	343.465	176.769	84.1292	290.741	289.07	111.521	307.889	134.293	90.4429	277.238	138.165	396.614	405.902	515.847	567.978	813.878	392.046	1000.79	284.844	274.225	270.239	429.246	44.8506
[truncated: 9,979 more rows]

## Sheet: Table S7
																																							Table S7. Differential metabolites identified between CRSwNP and control groups
[truncated: 983 more rows]

[truncated: 9 more sheets: Table S8, Table S9, Table S10, Table S11, Table S12, Table S13, Table S14, Table S15, Table S16]
